# Supplementary material for: Efficient deep red/near-infrared thermally activated delayed fluorescence emitters via molecular reconstruction: theoretical insights
Source: Royal Society of Chemistry journal article supplement (doi:10.1039/d2cp03697e), 2022-01-01
Supplement: d2cp03697e1.pdf [file d2cp03697e1.pdf]

*Supporting Information for*  
Efficient Deep Red/Near-Infrared Thermally  
Activated Delayed Fluorescence Emitters via  
Molecular Reconstruction: Theoretical  
Insights

*Kai Zhang,<sup>a</sup> Lei Cai,<sup>ab</sup> Jianzhong Fan,<sup>a</sup> Yuzhi Song,<sup>a</sup> Lili Lin<sup>\*a</sup>, Chuan-Kui Wang<sup>\*a</sup>*

<sup>a</sup> Shandong Province Key Laboratory of Medical Physics and Image Processing  
Technology, School of Physics and Electronics, Shandong Normal University,  
250014 Jinan, China.

<sup>b</sup> Institute of Functional Nano & Soft Materials (FUNSOM), Jiangsu Key Laboratory  
for Carbon-Based Functional Materials & Devices, Soochow University, Suzhou,  
Jiangsu 215123, China

**Corresponding Author**

\* Author to whom correspondence should be addressed.

E-mail: ckwang@sdnu.edu.cn and linll@sdnu.edu.cn.

The crystal prediction of Polymerph Predictor mainly includes three processes:

(1) Monte Carlo simulated annealing, simulated annealing consists of two stages: heating and cooling. (2) Cluster analysis: Monte Carlo simulation will obtain a large number of unoptimized structures, including the results of local energy minimization and similar structures. Cluster analysis adopts a method similar to energy optimization to find representatives from similar structures and remove other redundant crystal structures. (3) Energy minimization: the "cluster representation" obtained from the above (2) needs to be further refined and optimized, involving all degrees of freedom.

Specific parameter setting:

(1) Two single molecules were optimised using PBE0/1-3/6-31g\*, using the optimised structure as a rigid body. Calculations of electrostatic and Van der Waals interactions were carried out by the Ewald long-range summation method. (2) The DREIDING 2.21 force field suitable for molecular crystals was selected. (3) Select four common spatial point groups:  $P2_1/c$ , P-1,  $P2_12_12_1$  and  $P2_1$ . (4) The number of molecules in the asymmetric unit was chosen to be 1. (5) The maximum temperature for simulated annealing was 10000 K and the minimum was 300 K.

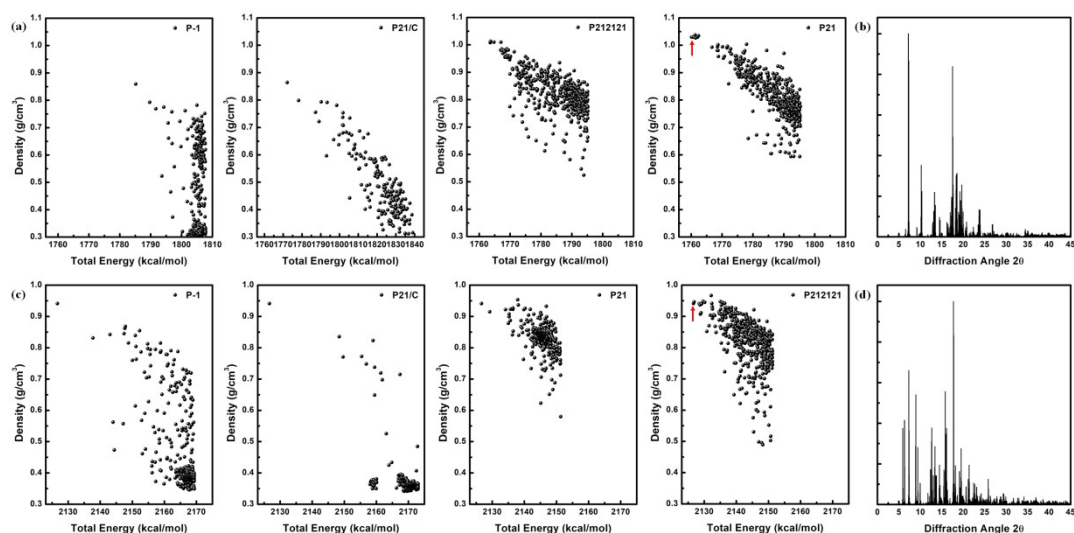

Fig. S1. Results of the polymorph prediction of CNQ-f-TPA(a)/CNQ-b-TPA(c) in  $P2_1/P2_12_12_1$  space group as an energy-density plot. Each point represents one predicted crystal structure. The simulated XRPD of chosen structures for CNQ-f-TPA (c) and CNQ-b-TPA(d).

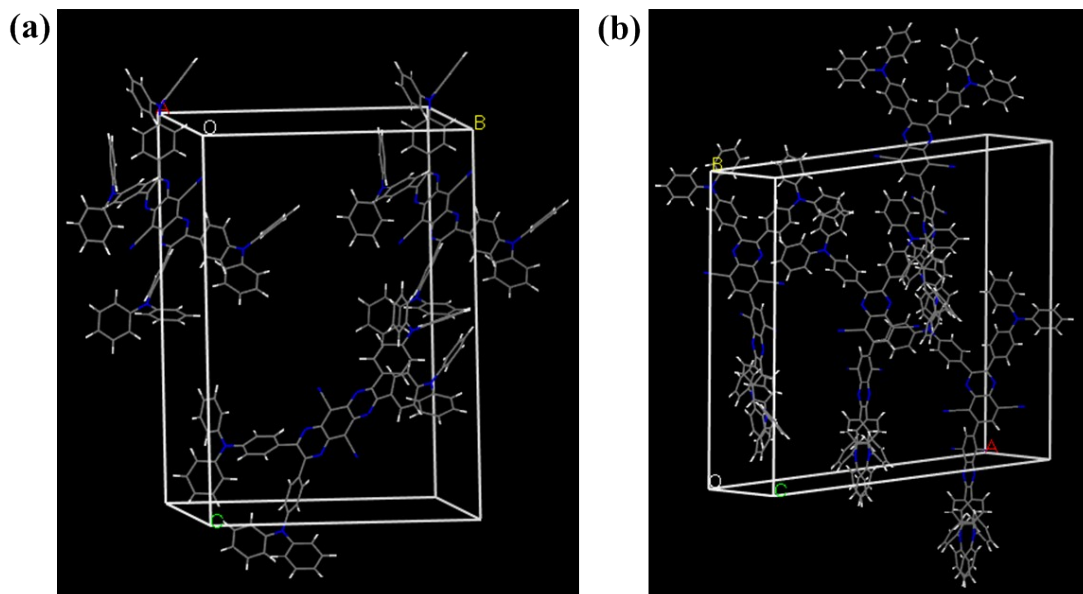

Fig. S2. Predicted crystal structures of CNQ-f-TPA and CNQ-b-TPA.

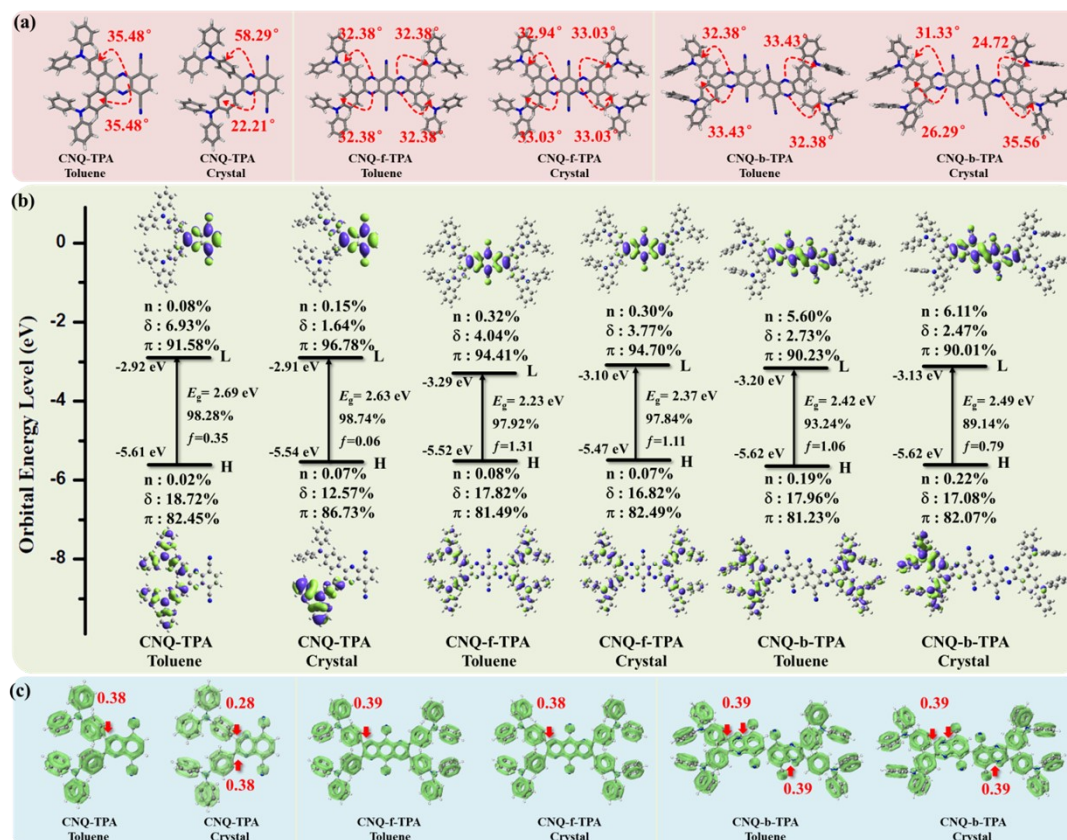

Fig. S3. (a) The  $S_1$ -optimized geometries of CNQ-TPA, CNQ-f-TPA and CNQ-b-TPA. (b) Involved molecular orbitals in the energy levels, transition proportions and oscillator strengths for CNQ-TPA, CNQ-f-TPA and CNQ-b-TPA and its derivatives at the  $S_1$ -optimized geometries in toluene and crystal state. (c) The localized orbital locator- $\pi$  (LOL- $\pi$ ) isosurfaces for CNQ-TPA, CNQ-f-TPA and CNQ-b-TPA.

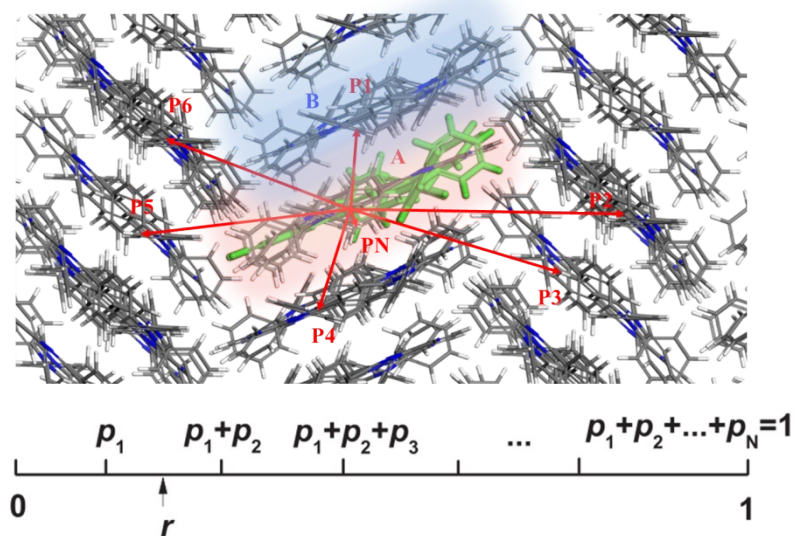

Fig. S4. Top: schematic representation of the charge hopping pathways from molecule A to all its neighbors with probabilities  $P_1$ ,  $P_2$ , ...,  $P_N$ , where  $N$  is the number of neighbors. Bottom: a unit length is divided into  $N$  parts according to each probability, and a uniformly distributed random number,  $r$ , is generated.

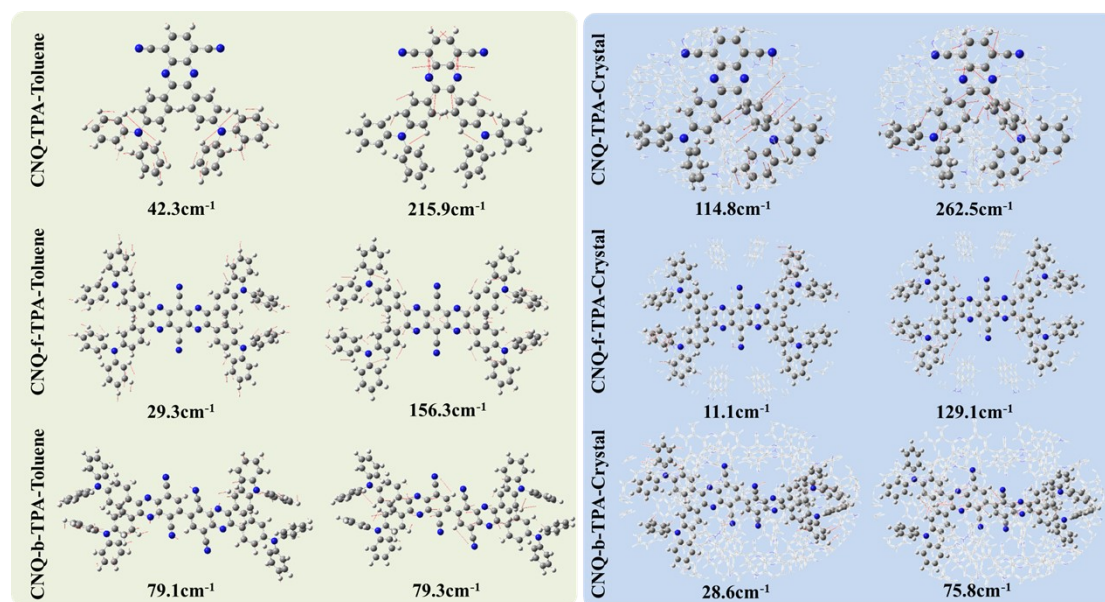

Fig. S5. Representative vibration modes of CNQ-TPA, CNQ-f-TPA and CNQ-b-TPA in toluene and crystal.

Cartesian coordinates of  $S_0$  state of optimized CNQ-TPA in toluene:

|   |             |             |             |
|---|-------------|-------------|-------------|
| C | 7.59463600  | -0.51797300 | 0.49487600  |
| H | 8.11408500  | 0.29269400  | 0.99313700  |
| C | 7.61933600  | -2.45794400 | -0.91796000 |
| H | 8.15658300  | -3.16464600 | -1.54034900 |
| C | 8.30041300  | -1.41906300 | -0.29422700 |
| H | 9.37132500  | -1.31275900 | -0.42120900 |
| C | 6.22502000  | -0.65569700 | 0.66813900  |
| C | 5.53858500  | -1.69182700 | 0.03189600  |
| H | 5.67995000  | 0.03906400  | 1.29617700  |
| N | 4.14270800  | -1.83732100 | 0.20363000  |
| C | 6.24667700  | -2.59222500 | -0.76580300 |
| C | 3.29761200  | -0.72661800 | 0.13917700  |
| C | 3.60703900  | -3.13083000 | 0.40147900  |
| H | 5.71574100  | -3.39548000 | -1.26270500 |
| C | 2.13549100  | -0.66895200 | 0.91984100  |
| C | 3.59082300  | 0.35516500  | -0.70167300 |
| C | 4.21097800  | -4.01111700 | 1.30085000  |
| C | 2.48261600  | -3.54804600 | -0.31297700 |
| H | 1.91045300  | -1.47965700 | 1.60149100  |
| C | 1.28333600  | 0.41524500  | 0.83759600  |
| H | 4.48351200  | 0.33117800  | -1.31396100 |
| C | 2.74626900  | 1.44611300  | -0.75966900 |
| C | 3.69900500  | -5.28881200 | 1.47554200  |
| H | 5.08289300  | -3.68749100 | 1.85688500  |
| H | 2.01807900  | -2.87047800 | -1.01958900 |
| C | 1.96865900  | -4.82279000 | -0.12213600 |
| C | 1.56471400  | 1.49129200  | -0.01150400 |
| H | 0.40279600  | 0.43587200  | 1.46744600  |
| H | 2.98853800  | 2.28038300  | -1.40649300 |
| H | 4.17810600  | -5.96233200 | 2.17709600  |
| C | 2.57436400  | -5.70113700 | 0.76950400  |
| H | 1.09787100  | -5.13327400 | -0.68868400 |
| C | 0.72361200  | 2.69702000  | -0.07315900 |
| H | 2.17650200  | -6.69938400 | 0.91021300  |
| N | 1.36760200  | 3.82983100  | -0.23981400 |
| C | -0.72354500 | 2.69703400  | 0.07298900  |
| C | 0.68648600  | 4.98690200  | -0.16197100 |
| N | -1.36750600 | 3.82985000  | 0.23971900  |
| C | -1.56467000 | 1.49131800  | 0.01138100  |
| C | -0.68636500 | 4.98690900  | 0.16193700  |
| C | 1.35721500  | 6.22417700  | -0.34725500 |
| C | -1.28336200 | 0.41526800  | -0.83773700 |
| C | -2.74618600 | 1.44616500  | 0.75960800  |

|   |             |             |             |
|---|-------------|-------------|-------------|
| C | -1.35706700 | 6.22419000  | 0.34728100  |
| C | 0.67701000  | 7.41542300  | -0.17839500 |
| C | 2.74122800  | 6.22760300  | -0.69867800 |
| C | -2.13554800 | -0.66890900 | -0.91993900 |
| H | -0.40285900 | 0.43587700  | -1.46763800 |
| H | -2.98840300 | 2.28044000  | 1.40644600  |
| C | -3.59076900 | 0.35523600  | 0.70165600  |
| C | -0.67683700 | 7.41542900  | 0.17848100  |
| C | -2.74107900 | 6.22762900  | 0.69870900  |
| H | 1.19590000  | 8.35488200  | -0.31659100 |
| N | 3.86056500  | 6.26606600  | -0.98855500 |
| H | -1.91056800 | -1.47961600 | -1.60160600 |
| C | -3.29762800 | -0.72655000 | -0.13921300 |
| H | -4.48342600 | 0.33126800  | 1.31399100  |
| H | -1.19570700 | 8.35489300  | 0.31672500  |
| N | -3.86042600 | 6.26607400  | 0.98855200  |
| N | -4.14275300 | -1.83723400 | -0.20362300 |
| C | -3.60712400 | -3.13075500 | -0.40150500 |
| C | -5.53861800 | -1.69170900 | -0.03181500 |
| C | -2.48267000 | -3.54799700 | 0.31288500  |
| C | -4.21113400 | -4.01102600 | -1.30084300 |
| C | -6.24668800 | -2.59209000 | 0.76592300  |
| C | -6.22506300 | -0.65556500 | -0.66802200 |
| H | -2.01807700 | -2.87044100 | 1.01947300  |
| C | -1.96875200 | -4.82275200 | 0.12201300  |
| H | -5.08307300 | -3.68738000 | -1.85682800 |
| C | -3.69919900 | -5.28873200 | -1.47556700 |
| H | -5.71574300 | -3.39535600 | 1.26279800  |
| C | -7.61933500 | -2.45777900 | 0.91815400  |
| H | -5.68001100 | 0.03918300  | -1.29609000 |
| C | -7.59466800 | -0.51781000 | -0.49468700 |
| H | -1.09793800 | -5.13325700 | 0.68851100  |
| C | -2.57452700 | -5.70108400 | -0.76959400 |
| H | -4.17835600 | -5.96224000 | -2.17709600 |
| C | -8.30042200 | -1.41888200 | 0.29445600  |
| H | -8.15656500 | -3.16446700 | 1.54057100  |
| H | -8.11412500 | 0.29286900  | -0.99292100 |
| H | -2.17669500 | -6.69934000 | -0.91032800 |
| H | -9.37132500 | -1.31255400 | 0.42149400  |

Cartesian coordinates of  $S_0$  state of optimized CNQ-TPA in crystal:

|       |            |             |               |
|-------|------------|-------------|---------------|
| N-N_R | 9.51408100 | 11.83721300 | -4.94135200 L |
| N-N_R | 9.27517700 | 9.25272600  | -6.00569200 L |

|       |             |             |               |
|-------|-------------|-------------|---------------|
| N-N_R | 14.72288300 | 12.99155700 | -1.52434300 L |
| C-C_R | 10.45707800 | 10.92826100 | -4.71005300 L |
| C-C_R | 13.88942600 | 11.37621100 | -3.12504100 L |
| C-C_R | 11.60079700 | 11.40540300 | -3.90425500 L |
| C-C_R | 12.89099000 | 10.85197400 | -3.91550900 L |
| C-C_R | 10.30304800 | 9.58140000  | -5.24291300 L |
| N-N_R | 14.18209300 | 5.54747600  | -4.24469800 L |
| C-C_R | 11.40614800 | 12.52497400 | -3.08757200 L |
| C-C_R | 8.31202100  | 10.19188200 | -6.22269600 L |
| C-C_R | 13.68356600 | 12.48430800 | -2.31146600 L |
| C-C_R | 8.42641400  | 11.46870700 | -5.66763600 L |
| C-C_R | 15.69089900 | 12.07565900 | -0.97600200 L |
| C-C_R | 12.40074700 | 13.04798900 | -2.31028600 L |
| C-C_R | 11.25761200 | 8.48077000  | -4.97309500 L |
| C-C_R | 7.16429900  | 9.86308000  | -6.97932900 L |
| C-C_R | 15.20073400 | 14.57786300 | 0.25233800 L  |
| C-C_R | 14.74362800 | 14.32546600 | -1.02370300 L |
| C-C_R | 12.44919400 | 7.06021100  | -3.44319100 L |
| C-C_R | 11.53176500 | 8.06522200  | -3.68120000 L |
| C-C_R | 13.13724800 | 6.48485500  | -4.50186000 L |
| C-C_R | 7.38714200  | 12.40765500 | -5.88408500 L |
| C-C_R | 14.14433700 | 4.27522700  | -4.87141600 L |
| C-C_R | 15.29794000 | 11.08972200 | -0.11508300 L |
| C-C_R | 12.82259700 | 6.84966500  | -5.78500300 L |
| C-C_R | 11.87419200 | 7.83764400  | -6.02182400 L |
| C-C_R | 17.03422100 | 12.26095400 | -1.23374000 L |
| C-C_R | 6.27843500  | 12.06598600 | -6.61007100 L |
| C-C_R | 6.16924000  | 10.79424500 | -7.16210800 L |
| C-C_R | 7.52959000  | 13.71560900 | -5.31284400 L |
| N-N_R | 7.61691000  | 14.76006000 | -4.85565700 L |
| C-C_R | 14.36915500 | 15.39438300 | -1.81883400 L |
| C-C_R | 15.18014700 | 5.89500300  | -3.31910200 L |
| C-C_R | 17.95903600 | 11.45477400 | -0.60675600 L |
| C-C_R | 7.04796300  | 8.55109600  | -7.56553400 L |
| C-C_R | 16.23216400 | 10.28107700 | 0.50218400 L  |
| N-N_R | 6.92118500  | 7.52763500  | -8.04443400 L |
| C-C_R | 14.92541400 | 16.91817900 | -0.05463100 L |
| C-C_R | 12.95432700 | 3.58792900  | -4.96785000 L |
| C-C_R | 17.57066500 | 10.46930300 | 0.24747400 L  |
| C-C_R | 15.30885100 | 15.86139300 | 0.72387100 L  |
| C-C_R | 15.29080300 | 3.69818100  | -5.39809100 L |
| C-C_R | 12.91165500 | 2.33817000  | -5.56108600 L |
| C-C_R | 14.44501800 | 16.67668500 | -1.30267800 L |
| C-C_R | 16.76116600 | 5.30747600  | -1.61169000 L |

|       |             |             |               |
|-------|-------------|-------------|---------------|
| C-C_R | 15.80051400 | 4.92061900  | -2.53246700 L |
| C-C_R | 15.55331100 | 7.21203400  | -3.14067300 L |
| C-C_R | 15.23106200 | 2.43267300  | -5.97617500 L |
| C-C_R | 14.04442800 | 1.76037200  | -6.05070800 L |
| C-C_R | 16.50088700 | 7.54694100  | -2.18943000 L |
| C-C_R | 17.11497200 | 6.58734300  | -1.42281700 L |
| N-N_R | 10.03685400 | 5.83963200  | 3.28517000 L  |
| N-N_R | 9.79799200  | 3.25587800  | 2.22150800 L  |
| N-N_R | 15.24565600 | 6.99397600  | 6.70217900 L  |
| C-C_R | 10.97989400 | 4.93141300  | 3.51714700 L  |
| C-C_R | 14.41219900 | 5.37862900  | 5.10148100 L  |
| C-C_R | 12.12352300 | 5.40850100  | 4.32153500 L  |
| C-C_R | 13.41380600 | 4.85512600  | 4.31169000 L  |
| C-C_R | 10.82582100 | 3.58381800  | 2.98360800 L  |
| N-N_R | 14.70486700 | -0.45010500 | 3.98182300 L  |
| C-C_R | 11.92887500 | 6.52807200  | 5.13821700 L  |
| C-C_R | 8.83483700  | 4.19503400  | 2.00450400 L  |
| C-C_R | 14.20634000 | 6.48672600  | 5.91505600 L  |
| C-C_R | 8.94918700  | 5.47112600  | 2.55888500 L  |
| C-C_R | 16.21367200 | 6.07807800  | 7.25052000 L  |
| C-C_R | 12.92352000 | 7.05040800  | 5.91623500 L  |
| C-C_R | 11.78042800 | 2.48392200  | 3.25410500 L  |
| C-C_R | 7.68702600  | 3.86617900  | 1.24646100 L  |
| C-C_R | 15.72355000 | 8.58101500  | 8.47953800 L  |
| C-C_R | 15.26640100 | 8.32788400  | 7.20281800 L  |
| C-C_R | 12.97196700 | 1.06263000  | 4.78333100 L  |
| C-C_R | 12.05453800 | 2.06764000  | 4.54532200 L  |
| C-C_R | 13.66006300 | 0.48800700  | 3.72534000 L  |
| C-C_R | 7.90991500  | 6.41007300  | 2.34243600 L  |
| C-C_R | 14.66711100 | -1.72235400 | 3.35510600 L  |
| C-C_R | 15.82071400 | 5.09214100  | 8.11143900 L  |
| C-C_R | 13.34541200 | 0.85281700  | 2.44219700 L  |
| C-C_R | 12.39700800 | 1.84079600  | 2.20537600 L  |
| C-C_R | 17.55699400 | 6.26337300  | 6.99278200 L  |
| C-C_R | 6.80125100  | 6.06913900  | 1.61712900 L  |
| C-C_R | 6.69205600  | 4.79739800  | 1.06509200 L  |
| C-C_R | 8.05236400  | 7.71802800  | 2.91367800 L  |
| N-N_R | 8.13968300  | 8.76247900  | 3.37086500 L  |
| C-C_R | 14.89197000 | 9.39753500  | 6.40836600 L  |
| C-C_R | 15.70296200 | -0.10184500 | 4.90809800 L  |
| C-C_R | 18.48180900 | 5.45719200  | 7.61976600 L  |
| C-C_R | 7.57073600  | 2.55351500  | 0.66098700 L  |
| C-C_R | 16.75493700 | 4.28349500  | 8.72870600 L  |
| N-N_R | 7.44400000  | 1.53078700  | 0.18276600 L  |



|       |             |             |               |
|-------|-------------|-------------|---------------|
| C-C_R | 15.44818800 | 10.92059800 | 8.17189100 L  |
| C-C_R | 13.47710000 | -2.40965300 | 3.25867100 L  |
| C-C_R | 18.09339100 | 4.47240100  | 8.47326300 L  |
| C-C_R | 15.83162400 | 9.86381100  | 8.95039300 L  |
| C-C_R | 15.81357600 | -2.29940000 | 2.82843000 L  |
| C-C_R | 13.43442900 | -3.65941100 | 2.66543600 L  |
| C-C_R | 14.96783400 | 10.67983700 | 6.92452200 L  |
| C-C_R | 17.28393900 | -0.69010600 | 6.61483200 L  |
| C-C_R | 16.32333000 | -1.07622900 | 5.69473300 L  |
| C-C_R | 16.07608500 | 1.21445300  | 5.08584900 L  |
| C-C_R | 15.75383500 | -3.56490800 | 2.25034600 L  |
| C-C_R | 14.56715400 | -4.23653000 | 2.17508100 L  |
| C-C_R | 17.02370300 | 1.55009300  | 6.03777000 L  |
| C-C_R | 17.63774100 | 0.59117500  | 6.80365100 L  |
| N-N_R | 10.55962300 | -0.15653600 | 11.51163800 L |
| N-N_R | 10.32076600 | -2.74170300 | 10.44802900 L |
| N-N_R | 15.76842900 | 0.99639500  | 14.92870100 L |
| C-C_R | 11.50262100 | -1.06548800 | 11.74293600 L |
| C-C_R | 14.93501500 | -0.61821800 | 13.32868100 L |
| C-C_R | 12.64633900 | -0.58834700 | 12.54873500 L |
| C-C_R | 13.93657900 | -1.14245500 | 12.53821200 L |
| C-C_R | 11.34863700 | -2.41302900 | 11.21080800 L |
| N-N_R | 15.22768200 | -6.44695300 | 12.20902300 L |
| C-C_R | 12.45164800 | 0.53049100  | 13.36473900 L |
| C-C_R | 9.35761000  | -1.80254700 | 10.23102600 L |
| C-C_R | 14.72915500 | 0.48987900  | 14.14225600 L |
| C-C_R | 9.47195600  | -0.52504200 | 10.78535300 L |
| C-C_R | 16.73648800 | 0.08123000  | 15.47772000 L |
| C-C_R | 13.44628900 | 1.05424000  | 14.14270300 L |
| C-C_R | 12.30320100 | -3.51365900 | 11.48062600 L |
| C-C_R | 8.20984100  | -2.13066900 | 9.47366100 L  |
| C-C_R | 16.24632300 | 2.58343400  | 16.70606000 L |
| C-C_R | 15.78921700 | 2.33103700  | 15.43001800 L |
| C-C_R | 13.49478200 | -4.93421800 | 13.01053100 L |
| C-C_R | 12.57731200 | -3.92994100 | 12.77184300 L |
| C-C_R | 14.18279000 | -5.50889500 | 11.95113000 L |
| C-C_R | 8.43273100  | 0.41322500  | 10.56963600 L |
| C-C_R | 15.18992600 | -7.71920200 | 11.58230600 L |
| C-C_R | 16.34352900 | -0.90470700 | 16.33863900 L |
| C-C_R | 13.86818600 | -5.14476400 | 10.66871900 L |
| C-C_R | 12.91978100 | -4.15678500 | 10.43189700 L |
| C-C_R | 18.07981000 | 0.26652500  | 15.21998200 L |
| C-C_R | 7.32402400  | 0.07155700  | 9.84365100 L  |
| C-C_R | 7.21478200  | -1.19950400 | 9.29088200 L  |

|       |              |              |               |
|-------|--------------|--------------|---------------|
| C-C_R | 8.57513300   | 1.72186000   | 11.14014600 L |
| N-N_R | 8.66249800   | 2.76563100   | 11.59806500 L |
| C-C_R | 15.41474400  | 3.39995300   | 14.63488800 L |
| C-C_R | 16.22573600  | -6.09942700  | 13.13461900 L |
| C-C_R | 19.00458200  | -0.54038900  | 15.84628700 L |
| C-C_R | 8.09355200   | -3.44333300  | 8.88818700 L  |
| C-C_R | 17.27770600  | -1.71267300  | 16.95517400 L |
| N-N_R | 7.96677400   | -4.46679400  | 8.40928700 L  |
| C-C_R | 15.97100300  | 4.92375000   | 16.39909100 L |
| C-C_R | 13.99991500  | -8.40650000  | 11.48587100 L |
| C-C_R | 18.61620700  | -1.52444600  | 16.70046300 L |
| C-C_R | 16.35443900  | 3.86696400   | 17.17759300 L |
| C-C_R | 16.33635000  | -8.29698200  | 11.05495200 L |
| C-C_R | 13.95724400  | -9.65625900  | 10.89263600 L |
| C-C_R | 15.49060700  | 4.68225600   | 15.15104400 L |
| C-C_R | 17.80675400  | -6.68695300  | 14.84203200 L |
| C-C_R | 16.84605700  | -7.07313000  | 13.92052300 L |
| C-C_R | 16.59890000  | -4.78239500  | 13.31304800 L |
| C-C_R | 16.27665100  | -9.56175600  | 10.47754600 L |
| C-C_R | 15.08997000  | -10.23337800 | 10.40228100 L |
| C-C_R | 17.54647600  | -4.44748800  | 14.26429200 L |
| C-C_R | 18.16051500  | -5.40640600  | 15.03017200 L |
| N-N_R | -15.06803000 | 11.82202800  | -3.39029600 L |
| N-N_R | -15.30693400 | 9.23754100   | -4.45463600 L |
| N-N_R | -9.85922800  | 12.97637200  | 0.02671300 L  |
| C-C_R | -14.12503200 | 10.91307600  | -3.15899700 L |
| C-C_R | -10.69268500 | 11.36102500  | -1.57398500 L |
| C-C_R | -12.98131400 | 11.39021700  | -2.35319900 L |
| C-C_R | -11.69112000 | 10.83678900  | -2.36445400 L |
| C-C_R | -14.27906300 | 9.56621400   | -3.69185700 L |
| N-N_R | -10.40001700 | 5.53229100   | -2.69364300 L |
| C-C_R | -13.17596200 | 12.50978900  | -1.53651700 L |
| C-C_R | -16.27009000 | 10.17669700  | -4.67164000 L |
| C-C_R | -10.89854400 | 12.46912200  | -0.76041000 L |
| C-C_R | -16.15569700 | 11.45352200  | -4.11658000 L |
| C-C_R | -8.89121200  | 12.06047300  | 0.57505400 L  |
| C-C_R | -12.18136400 | 13.03280400  | -0.75923000 L |
| C-C_R | -13.32449900 | 8.46558400   | -3.42203900 L |
| C-C_R | -17.41781100 | 9.84789500   | -5.42827300 L |
| C-C_R | -9.38137600  | 14.56267800  | 1.80339400 L  |
| C-C_R | -9.83848300  | 14.31028000  | 0.52735200 L  |
| C-C_R | -12.13291700 | 7.04502600   | -1.89213500 L |
| C-C_R | -13.05034500 | 8.05003600   | -2.13014400 L |
| C-C_R | -11.44486300 | 6.46966900   | -2.95080400 L |

|       |              |             |               |
|-------|--------------|-------------|---------------|
| C-C_R | -17.19496900 | 12.39246900 | -4.33303000 L |
| C-C_R | -10.43777300 | 4.26004200  | -3.32036000 L |
| C-C_R | -9.28417000  | 11.07453600 | 1.43597300 L  |
| C-C_R | -11.75951400 | 6.83447900  | -4.23394700 L |
| C-C_R | -12.70791800 | 7.82245800  | -4.47076800 L |
| C-C_R | -7.54789000  | 12.24576900 | 0.31731600 L  |
| C-C_R | -18.30367500 | 12.05080100 | -5.05901500 L |
| C-C_R | -18.41287000 | 10.77906000 | -5.61105200 L |
| C-C_R | -17.05252000 | 13.70042400 | -3.76178800 L |
| N-N_R | -16.96520100 | 14.74487500 | -3.30460100 L |
| C-C_R | -10.21295600 | 15.37919700 | -0.26777800 L |
| C-C_R | -9.40196400  | 5.87981700  | -1.76804600 L |
| C-C_R | -6.62307500  | 11.43958800 | 0.94430000 L  |
| C-C_R | -17.53414800 | 8.53591100  | -6.01447900 L |
| C-C_R | -8.34994700  | 10.26589100 | 2.05324000 L  |
| N-N_R | -17.66092600 | 7.51244900  | -6.49337900 L |
| C-C_R | -9.65669600  | 16.90299300 | 1.49642500 L  |
| C-C_R | -11.62778400 | 3.57274300  | -3.41679500 L |
| C-C_R | -7.01144600  | 10.45411800 | 1.79853000 L  |
| C-C_R | -9.27326000  | 15.84620700 | 2.27492700 L  |
| C-C_R | -9.29130700  | 3.68299600  | -3.84703600 L |
| C-C_R | -11.67045500 | 2.32298500  | -4.01003000 L |
| C-C_R | -10.13709200 | 16.66150000 | 0.24837800 L  |
| C-C_R | -7.82094500  | 5.29229000  | -0.06063400 L |
| C-C_R | -8.78159600  | 4.90543400  | -0.98141100 L |
| C-C_R | -9.02879900  | 7.19684900  | -1.58961700 L |
| C-C_R | -9.35104900  | 2.41748800  | -4.42512000 L |
| C-C_R | -10.53768300 | 1.74518600  | -4.49965300 L |
| C-C_R | -8.08122300  | 7.53175600  | -0.63837400 L |
| C-C_R | -7.46713800  | 6.57215800  | 0.12823900 L  |
| N-N_R | -14.54525600 | 5.82444600  | 4.83622600 L  |
| N-N_R | -14.78411800 | 3.24069300  | 3.77256400 L  |
| N-N_R | -9.33645400  | 6.97879100  | 8.25323500 L  |
| C-C_R | -13.60221700 | 4.91622800  | 5.06820300 L  |
| C-C_R | -10.16991100 | 5.36344400  | 6.65253700 L  |
| C-C_R | -12.45858700 | 5.39331600  | 5.87259100 L  |
| C-C_R | -11.16830500 | 4.83994100  | 5.86274600 L  |
| C-C_R | -13.75628900 | 3.56863300  | 4.53466400 L  |
| N-N_R | -9.87724400  | -0.46529100 | 5.53287900 L  |
| C-C_R | -12.65323600 | 6.51288700  | 6.68927300 L  |
| C-C_R | -15.74727400 | 4.17984900  | 3.55556000 L  |
| C-C_R | -10.37577100 | 6.47154100  | 7.46611200 L  |
| C-C_R | -15.63292300 | 5.45594100  | 4.10994100 L  |
| C-C_R | -8.36843800  | 6.06289200  | 8.80157600 L  |

|       |              |             |               |
|-------|--------------|-------------|---------------|
| C-C_R | -11.65859000 | 7.03522200  | 7.46729100 L  |
| C-C_R | -12.80168300 | 2.46873700  | 4.80516000 L  |
| C-C_R | -16.89508500 | 3.85099300  | 2.79751700 L  |
| C-C_R | -8.85856100  | 8.56583000  | 10.03059400 L |
| C-C_R | -9.31570900  | 8.31269900  | 8.75387400 L  |
| C-C_R | -11.61014400 | 1.04744500  | 6.33438700 L  |
| C-C_R | -12.52757200 | 2.05245500  | 6.09637800 L  |
| C-C_R | -10.92204700 | 0.47282100  | 5.27639600 L  |
| C-C_R | -16.67219500 | 6.39488800  | 3.89349200 L  |
| C-C_R | -9.91500000  | -1.73753900 | 4.90616200 L  |
| C-C_R | -8.76139700  | 5.07695500  | 9.66249400 L  |
| C-C_R | -11.23669800 | 0.83763200  | 3.99325300 L  |
| C-C_R | -12.18510300 | 1.82561100  | 3.75643200 L  |
| C-C_R | -7.02511600  | 6.24818700  | 8.54383800 L  |
| C-C_R | -17.78085900 | 6.05395300  | 3.16818500 L  |
| C-C_R | -17.89005500 | 4.78221200  | 2.61614800 L  |
| C-C_R | -16.52974700 | 7.70284300  | 4.46473400 L  |
| N-N_R | -16.44242800 | 8.74729300  | 4.92192000 L  |
| C-C_R | -9.69014000  | 9.38234900  | 7.95942200 L  |
| C-C_R | -8.87914800  | -0.11703100 | 6.45915400 L  |
| C-C_R | -6.10030200  | 5.44200700  | 9.17082100 L  |
| C-C_R | -17.01137500 | 2.53832900  | 2.21204300 L  |
| C-C_R | -7.82717400  | 4.26831000  | 10.27976200 L |
| N-N_R | -17.13811000 | 1.51560100  | 1.73382100 L  |
| C-C_R | -9.13392300  | 10.90541200 | 9.72294700 L  |
| C-C_R | -11.10501100 | -2.42483800 | 4.80972700 L  |
| C-C_R | -6.48871900  | 4.45721600  | 10.02431900 L |
| C-C_R | -8.75048700  | 9.84862600  | 10.50144900 L |
| C-C_R | -8.76853400  | -2.31458600 | 4.37948600 L  |
| C-C_R | -11.14768200 | -3.67459700 | 4.21649200 L  |
| C-C_R | -9.61427700  | 10.66465200 | 8.47557800 L  |
| C-C_R | -7.29817200  | -0.70529100 | 8.16588700 L  |
| C-C_R | -8.25878000  | -1.09141400 | 7.24578900 L  |
| C-C_R | -8.50602600  | 1.19926800  | 6.63690400 L  |
| C-C_R | -8.82827500  | -3.58009400 | 3.80140200 L  |
| C-C_R | -10.01495600 | -4.25171500 | 3.72613700 L  |
| C-C_R | -7.55840800  | 1.53490800  | 7.58882600 L  |
| C-C_R | -6.94436900  | 0.57599000  | 8.35470700 L  |
| N-N_R | -14.02248700 | -0.17172200 | 13.06269300 L |
| N-N_R | -14.26134500 | -2.75688900 | 11.99908500 L |
| N-N_R | -8.81368100  | 0.98120900  | 16.47975600 L |
| C-C_R | -13.07949000 | -1.08067400 | 13.29399200 L |
| C-C_R | -9.64709600  | -0.63340400 | 14.87973700 L |
| C-C_R | -11.93577100 | -0.60353200 | 14.09979100 L |

|       |              |              |               |
|-------|--------------|--------------|---------------|
| C-C_R | -10.64553200 | -1.15764100  | 14.08926800 L |
| C-C_R | -13.23347400 | -2.42821500  | 12.76186400 L |
| N-N_R | -9.35442800  | -6.46213800  | 13.76007900 L |
| C-C_R | -12.13046300 | 0.51530600   | 14.91579500 L |
| C-C_R | -15.22450100 | -1.81773200  | 11.78208100 L |
| C-C_R | -9.85295500  | 0.47469300   | 15.69331200 L |
| C-C_R | -15.11015400 | -0.54022800  | 12.33640900 L |
| C-C_R | -7.84562300  | 0.06604400   | 17.02877600 L |
| C-C_R | -11.13582100 | 1.03905400   | 15.69375900 L |
| C-C_R | -12.27891000 | -3.52884500  | 13.03168200 L |
| C-C_R | -16.37226900 | -2.14585500  | 11.02471700 L |
| C-C_R | -8.33578800  | 2.56824900   | 18.25711500 L |
| C-C_R | -8.79289400  | 2.31585100   | 16.98107400 L |
| C-C_R | -11.08732800 | -4.94940300  | 14.56158700 L |
| C-C_R | -12.00479900 | -3.94512600  | 14.32289900 L |
| C-C_R | -10.39932000 | -5.52408000  | 13.50218600 L |
| C-C_R | -16.14938000 | 0.39804000   | 12.12069200 L |
| C-C_R | -9.39218400  | -7.73438700  | 13.13336200 L |
| C-C_R | -8.23858100  | -0.91989300  | 17.88969400 L |
| C-C_R | -10.71392500 | -5.15995000  | 12.21977400 L |
| C-C_R | -11.66233000 | -4.17197100  | 11.98295300 L |
| C-C_R | -6.50230100  | 0.25134000   | 16.77103800 L |
| C-C_R | -17.25808600 | 0.05637200   | 11.39470700 L |
| C-C_R | -17.36732800 | -1.21469000  | 10.84193700 L |
| C-C_R | -16.00697800 | 1.70667400   | 12.69120100 L |
| N-N_R | -15.91961200 | 2.75044600   | 13.14912000 L |
| C-C_R | -9.16736700  | 3.38476800   | 16.18594300 L |
| C-C_R | -8.35637500  | -6.11461200  | 14.68567500 L |
| C-C_R | -5.57752800  | -0.55557400  | 17.39734300 L |
| C-C_R | -16.48855900 | -3.45851900  | 10.43924300 L |
| C-C_R | -7.30440500  | -1.72785800  | 18.50623000 L |
| N-N_R | -16.61533700 | -4.48198000  | 9.96034300 L  |
| C-C_R | -8.61110700  | 4.90856400   | 17.95014700 L |
| C-C_R | -10.58219500 | -8.42168600  | 13.03692700 L |
| C-C_R | -5.96590400  | -1.53963200  | 18.25151900 L |
| C-C_R | -8.22767100  | 3.85177800   | 18.72864900 L |
| C-C_R | -8.24576100  | -8.31216700  | 12.60600800 L |
| C-C_R | -10.62486600 | -9.67144400  | 12.44369200 L |
| C-C_R | -9.09150400  | 4.66707000   | 16.70210000 L |
| C-C_R | -6.77535600  | -6.70213900  | 16.39308700 L |
| C-C_R | -7.73605400  | -7.08831600  | 15.47157900 L |
| C-C_R | -7.98321000  | -4.79758000  | 14.86410400 L |
| C-C_R | -8.30546000  | -9.57694100  | 12.02860200 L |
| C-C_R | -9.49214100  | -10.24856300 | 11.95333700 L |

|       |             |             |                |
|-------|-------------|-------------|----------------|
| C-C_R | -7.03563500 | -4.46267300 | 15.81534800 L  |
| C-C_R | -6.42159600 | -5.42159200 | 16.58122800 L  |
| N-N_R | 8.91780900  | 1.50662000  | -14.49258400 L |
| N-N_R | 8.67890500  | -1.07786700 | -15.55692400 L |
| N-N_R | 14.12661100 | 2.66096500  | -11.07557500 L |
| C-C_R | 9.86080600  | 0.59766800  | -14.26128500 L |
| C-C_R | 13.29315400 | 1.04561800  | -12.67627300 L |
| C-C_R | 11.00452500 | 1.07481000  | -13.45548700 L |
| C-C_R | 12.29471800 | 0.52138100  | -13.46674200 L |
| C-C_R | 9.70677600  | -0.74919300 | -14.79414600 L |
| N-N_R | 13.58582200 | -4.78311700 | -13.79593100 L |
| C-C_R | 10.80987600 | 2.19438100  | -12.63880500 L |
| C-C_R | 7.71574900  | -0.13871100 | -15.77392800 L |
| C-C_R | 13.08729400 | 2.15371500  | -11.86269800 L |
| C-C_R | 7.83014200  | 1.13811500  | -15.21886900 L |
| C-C_R | 15.09462700 | 1.74506600  | -10.52723400 L |
| C-C_R | 11.80447500 | 2.71739600  | -11.86151900 L |
| C-C_R | 10.66134000 | -1.84982300 | -14.52432800 L |
| C-C_R | 6.56802700  | -0.46751200 | -16.53056100 L |
| C-C_R | 14.60446200 | 4.24727000  | -9.29889400 L  |
| C-C_R | 14.14735600 | 3.99487300  | -10.57493600 L |
| C-C_R | 11.85292200 | -3.27038100 | -12.99442300 L |
| C-C_R | 10.93549300 | -2.26537100 | -13.23243200 L |
| C-C_R | 12.54097600 | -3.84573800 | -14.05309200 L |
| C-C_R | 6.79087000  | 2.07706200  | -15.43531800 L |
| C-C_R | 13.54806600 | -6.05536500 | -14.42264800 L |
| C-C_R | 14.70166800 | 0.75912900  | -9.66631500 L  |
| C-C_R | 12.22632500 | -3.48092800 | -15.33623500 L |
| C-C_R | 11.27792000 | -2.49294900 | -15.57305600 L |
| C-C_R | 16.43794900 | 1.93036100  | -10.78497200 L |
| C-C_R | 5.68216400  | 1.73539400  | -16.16130300 L |
| C-C_R | 5.57296800  | 0.46365300  | -16.71334000 L |
| C-C_R | 6.93331900  | 3.38501700  | -14.86407600 L |
| N-N_R | 7.02063800  | 4.42946700  | -14.40688900 L |
| C-C_R | 13.77288300 | 5.06379000  | -11.37006600 L |
| C-C_R | 14.58387500 | -4.43559000 | -12.87033500 L |
| C-C_R | 17.36276400 | 1.12418100  | -10.15798800 L |
| C-C_R | 6.45169100  | -1.77949700 | -17.11676700 L |
| C-C_R | 15.63589200 | -0.04951600 | -9.04904800 L  |
| N-N_R | 6.32491300  | -2.80295800 | -17.59566700 L |
| C-C_R | 14.32914200 | 6.58758600  | -9.60586300 L  |
| C-C_R | 12.35805500 | -6.74266400 | -14.51908300 L |
| C-C_R | 16.97439300 | 0.13871000  | -9.30375800 L  |
| C-C_R | 14.71257900 | 5.53080000  | -8.82736100 L  |

|       |             |              |                |
|-------|-------------|--------------|----------------|
| C-C_R | 14.69453100 | -6.63241200  | -14.94932400 L |
| C-C_R | 12.31538300 | -7.99242300  | -15.11231800 L |
| C-C_R | 13.84874600 | 6.34609200   | -10.85391000 L |
| C-C_R | 16.16489400 | -5.02311700  | -11.16292200 L |
| C-C_R | 15.20424300 | -5.40997400  | -12.08369900 L |
| C-C_R | 14.95703900 | -3.11855800  | -12.69190500 L |
| C-C_R | 14.63479000 | -7.89792000  | -15.52740800 L |
| C-C_R | 13.44815600 | -8.57022100  | -15.60194100 L |
| C-C_R | 15.90461500 | -2.78365200  | -11.74066200 L |
| C-C_R | 16.51870100 | -3.74324900  | -10.97404900 L |
| N-N_R | 9.44058200  | -4.49096100  | -6.26606300 L  |
| N-N_R | 9.20172100  | -7.07471500  | -7.32972400 L  |
| N-N_R | 14.64938400 | -3.33661700  | -2.84905300 L  |
| C-C_R | 10.38362200 | -5.39917900  | -6.03408500 L  |
| C-C_R | 13.81592700 | -4.95196300  | -4.44975100 L  |
| C-C_R | 11.52725200 | -4.92209200  | -5.22969700 L  |
| C-C_R | 12.81753400 | -5.47546600  | -5.23954200 L  |
| C-C_R | 10.22954900 | -6.74677400  | -6.56762400 L  |
| N-N_R | 14.10859500 | -10.78069800 | -5.56940900 L  |
| C-C_R | 11.33260300 | -3.80252000  | -4.41301500 L  |
| C-C_R | 8.23856500  | -6.13555800  | -7.54672800 L  |
| C-C_R | 13.61006800 | -3.84386600  | -3.63617600 L  |
| C-C_R | 8.35291500  | -4.85946700  | -6.99234700 L  |
| C-C_R | 15.61740000 | -4.25251500  | -2.30071200 L  |
| C-C_R | 12.32724800 | -3.28018500  | -3.63499700 L  |
| C-C_R | 11.18415600 | -7.84667100  | -6.29712800 L  |
| C-C_R | 7.09075400  | -6.46441400  | -8.30477100 L  |
| C-C_R | 15.12727800 | -1.74957700  | -1.07169400 L  |
| C-C_R | 14.67012900 | -2.00270800  | -2.34841400 L  |
| C-C_R | 12.37569500 | -9.26796300  | -4.76790100 L  |
| C-C_R | 11.45826700 | -8.26295200  | -5.00591000 L  |
| C-C_R | 13.06379200 | -9.84258600  | -5.82589200 L  |
| C-C_R | 7.31364300  | -3.92052000  | -7.20879600 L  |
| C-C_R | 14.07083900 | -12.05294700 | -6.19612600 L  |
| C-C_R | 15.22444200 | -5.23845200  | -1.43979400 L  |
| C-C_R | 12.74914000 | -9.47777600  | -7.10903500 L  |
| C-C_R | 11.80073600 | -8.48979700  | -7.34585700 L  |
| C-C_R | 16.96072200 | -4.06722000  | -2.55845000 L  |
| C-C_R | 6.20497900  | -4.26145400  | -7.93410300 L  |
| C-C_R | 6.09578400  | -5.53319500  | -8.48614000 L  |
| C-C_R | 7.45609200  | -2.61256500  | -6.63755500 L  |
| N-N_R | 7.54341100  | -1.56811400  | -6.18036800 L  |
| C-C_R | 14.29569900 | -0.93305800  | -3.14286600 L  |
| C-C_R | 15.10669000 | -10.43243800 | -4.64313500 L  |

|       |             |              |               |
|-------|-------------|--------------|---------------|
| C-C_R | 17.88553700 | -4.87340000  | -1.93146700 L |
| C-C_R | 6.97446400  | -7.77707800  | -8.89024500 L |
| C-C_R | 16.15866500 | -6.04709700  | -0.82252600 L |
| N-N_R | 6.84772900  | -8.79980600  | -9.36846700 L |
| C-C_R | 14.85191600 | 0.59000500   | -1.37934100 L |
| C-C_R | 12.88082800 | -12.74024500 | -6.29256100 L |
| C-C_R | 17.49712000 | -5.85819100  | -1.07796900 L |
| C-C_R | 15.23535200 | -0.46678100  | -0.60083900 L |
| C-C_R | 15.21730500 | -12.62999300 | -6.72280200 L |
| C-C_R | 12.83815700 | -13.99000400 | -6.88579600 L |
| C-C_R | 14.37156200 | 0.34924400   | -2.62671000 L |
| C-C_R | 16.68766700 | -11.02069800 | -2.93640100 L |
| C-C_R | 15.72705800 | -11.40682100 | -3.85649900 L |
| C-C_R | 15.47981300 | -9.11614000  | -4.46538400 L |
| C-C_R | 15.15756300 | -13.89550100 | -7.30088600 L |
| C-C_R | 13.97088200 | -14.56712300 | -7.37615100 L |
| C-C_R | 16.42743100 | -8.78049900  | -3.51346200 L |
| C-C_R | 17.04147000 | -9.73941800  | -2.74758200 L |
| N-N_R | 9.96335100  | -10.48712900 | 1.96040500 L  |
| N-N_R | 9.72449400  | -13.07229600 | 0.89679700 L  |
| N-N_R | 15.17215800 | -9.33419800  | 5.37746800 L  |
| C-C_R | 10.90634900 | -11.39608100 | 2.19170400 L  |
| C-C_R | 14.33874300 | -10.94881100 | 3.77744900 L  |
| C-C_R | 12.05006700 | -10.91893900 | 2.99750300 L  |
| C-C_R | 13.34030700 | -11.47304800 | 2.98698000 L  |
| C-C_R | 10.75236500 | -12.74362200 | 1.65957600 L  |
| N-N_R | 14.63141100 | -16.77754600 | 2.65779100 L  |
| C-C_R | 11.85537600 | -9.80010200  | 3.81350700 L  |
| C-C_R | 8.76133800  | -12.13314000 | 0.67979300 L  |
| C-C_R | 14.13288300 | -9.84071400  | 4.59102400 L  |
| C-C_R | 8.87568400  | -10.85563500 | 1.23412100 L  |
| C-C_R | 16.14021600 | -10.24936300 | 5.92648800 L  |
| C-C_R | 12.85001700 | -9.27635300  | 4.59147100 L  |
| C-C_R | 11.70692900 | -13.84425200 | 1.92939400 L  |
| C-C_R | 7.61357000  | -12.46126200 | -0.07757100 L |
| C-C_R | 15.65005100 | -7.74715900  | 7.15482700 L  |
| C-C_R | 15.19294500 | -7.99955600  | 5.87878600 L  |
| C-C_R | 12.89851100 | -15.26481000 | 3.45929900 L  |
| C-C_R | 11.98104000 | -14.26053400 | 3.22061100 L  |
| C-C_R | 13.58651800 | -15.83948800 | 2.39989800 L  |
| C-C_R | 7.83645900  | -9.91736700  | 1.01840400 L  |
| C-C_R | 14.59365500 | -18.04979400 | 2.03107300 L  |
| C-C_R | 15.74725700 | -11.23530000 | 6.78740600 L  |
| C-C_R | 13.27191400 | -15.47535700 | 1.11748600 L  |



|       |              |              |                |
|-------|--------------|--------------|----------------|
| C-C_R | 12.32350900  | -14.48737800 | 0.88066500 L   |
| C-C_R | 17.48353800  | -10.06406800 | 5.66875000 L   |
| C-C_R | 6.72775200   | -10.25903500 | 0.29241900 L   |
| C-C_R | 6.61851000   | -11.53009700 | -0.26035100 L  |
| C-C_R | 7.97886100   | -8.60873300  | 1.58891300 L   |
| N-N_R | 8.06622700   | -7.56496200  | 2.04683200 L   |
| C-C_R | 14.81847200  | -6.93063900  | 5.08365500 L   |
| C-C_R | 15.62946400  | -16.43001900 | 3.58338700 L   |
| C-C_R | 18.40831000  | -10.87098200 | 6.29505500 L   |
| C-C_R | 7.49728000   | -13.77392600 | -0.66304500 L  |
| C-C_R | 16.68143400  | -12.04326600 | 7.40394100 L   |
| N-N_R | 7.37050200   | -14.79738700 | -1.14194500 L  |
| C-C_R | 15.37473100  | -5.40684300  | 6.84785900 L   |
| C-C_R | 13.40364400  | -18.73709300 | 1.93463900 L   |
| C-C_R | 18.01993500  | -11.85503900 | 7.14923100 L   |
| C-C_R | 15.75816800  | -6.46362900  | 7.62636100 L   |
| C-C_R | 15.74007800  | -18.62757400 | 1.50372000 L   |
| C-C_R | 13.36097200  | -19.98685200 | 1.34140300 L   |
| C-C_R | 14.89433500  | -5.64833700  | 5.59981200 L   |
| C-C_R | 17.21048300  | -17.01754600 | 5.29079900 L   |
| C-C_R | 16.24978500  | -17.40372300 | 4.36929100 L   |
| C-C_R | 16.00262800  | -15.11298700 | 3.76181600 L   |
| C-C_R | 15.68037900  | -19.89234900 | 0.92631400 L   |
| C-C_R | 14.49369800  | -20.56397000 | 0.85104900 L   |
| C-C_R | 16.95020400  | -14.77808100 | 4.71305900 L   |
| C-C_R | 17.56424300  | -15.73699900 | 5.47894000 L   |
| N-N_R | -15.66430100 | 1.49143500   | -12.94152800 L |
| N-N_R | -15.90320600 | -1.09305200  | -14.00586900 L |
| N-N_R | -10.45549900 | 2.64577900   | -9.52451900 L  |
| C-C_R | -14.72130400 | 0.58248300   | -12.71022900 L |
| C-C_R | -11.28895700 | 1.03043200   | -11.12521700 L |
| C-C_R | -13.57758600 | 1.05962500   | -11.90443100 L |
| C-C_R | -12.28739200 | 0.50619600   | -11.91568600 L |
| C-C_R | -14.87533500 | -0.76437800  | -13.24309000 L |
| N-N_R | -10.99628900 | -4.79830200  | -12.24487500 L |
| C-C_R | -13.77223400 | 2.17919600   | -11.08774900 L |
| C-C_R | -16.86636100 | -0.15389600  | -14.22287200 L |
| C-C_R | -11.49481600 | 2.13852900   | -10.31164200 L |
| C-C_R | -16.75196900 | 1.12292900   | -13.66781300 L |
| C-C_R | -9.48748300  | 1.72988100   | -8.97617800 L  |
| C-C_R | -12.77763600 | 2.70221100   | -10.31046300 L |
| C-C_R | -13.92077000 | -1.86500800  | -12.97327200 L |
| C-C_R | -18.01408300 | -0.48269800  | -14.97950500 L |
| C-C_R | -9.97764800  | 4.23208500   | -7.74783800 L  |

|       |              |              |                |
|-------|--------------|--------------|----------------|
| C-C_R | -10.43475500 | 3.97968800   | -9.02388000 L  |
| C-C_R | -12.72918900 | -3.28556700  | -11.44336700 L |
| C-C_R | -13.64661700 | -2.28055700  | -11.68137600 L |
| C-C_R | -12.04113500 | -3.86092400  | -12.50203600 L |
| C-C_R | -17.79124000 | 2.06187600   | -13.88426200 L |
| C-C_R | -11.03404500 | -6.07055100  | -12.87159200 L |
| C-C_R | -9.88044200  | 0.74394400   | -8.11525900 L  |
| C-C_R | -12.35578600 | -3.49611300  | -13.78517900 L |
| C-C_R | -13.30419000 | -2.50813400  | -14.02200100 L |
| C-C_R | -8.14416200  | 1.91517600   | -9.23391600 L  |
| C-C_R | -18.89994700 | 1.72020800   | -14.61024700 L |
| C-C_R | -19.00914200 | 0.44846700   | -15.16228400 L |
| C-C_R | -17.64879200 | 3.36983100   | -13.31302000 L |
| N-N_R | -17.56147300 | 4.41428200   | -12.85583400 L |
| C-C_R | -10.80922800 | 5.04860400   | -9.81901100 L  |
| C-C_R | -9.99823600  | -4.45077600  | -11.31927900 L |
| C-C_R | -7.21934700  | 1.10899600   | -8.60693300 L  |
| C-C_R | -18.13042000 | -1.79468200  | -15.56571100 L |
| C-C_R | -8.94621900  | -0.06470200  | -7.49799200 L  |
| N-N_R | -18.25719700 | -2.81814400  | -16.04461100 L |
| C-C_R | -10.25296800 | 6.57240100   | -8.05480700 L  |
| C-C_R | -12.22405600 | -6.75784900  | -12.96802700 L |
| C-C_R | -7.60771800  | 0.12352500   | -7.75270300 L  |
| C-C_R | -9.86953200  | 5.51561400   | -7.27630500 L  |
| C-C_R | -9.88757900  | -6.64759700  | -13.39826800 L |
| C-C_R | -12.26672700 | -8.00760800  | -13.56126200 L |
| C-C_R | -10.73336400 | 6.33090700   | -9.30285400 L  |
| C-C_R | -8.41721700  | -5.03830200  | -9.61186600 L  |
| C-C_R | -9.37786800  | -5.42515900  | -10.53264300 L |
| C-C_R | -9.62507100  | -3.13374400  | -11.14085000 L |
| C-C_R | -9.94732000  | -7.91310500  | -13.97635200 L |
| C-C_R | -11.13395500 | -8.58540600  | -14.05088500 L |
| C-C_R | -8.67749500  | -2.79883700  | -10.18960600 L |
| C-C_R | -8.06341000  | -3.75843500  | -9.42299400 L  |
| N-N_R | -15.14152800 | -4.50614600  | -4.71500700 L  |
| N-N_R | -15.38039000 | -7.08990000  | -5.77866900 L  |
| N-N_R | -9.93272600  | -3.35180200  | -1.29799800 L  |
| C-C_R | -14.19848800 | -5.41436500  | -4.48303000 L  |
| C-C_R | -10.76618300 | -4.96714900  | -2.89869500 L  |
| C-C_R | -13.05485900 | -4.93727700  | -3.67864200 L  |
| C-C_R | -11.76457700 | -5.49065200  | -3.68848600 L  |
| C-C_R | -14.35256100 | -6.76196000  | -5.01656800 L  |
| N-N_R | -10.47351600 | -10.79588300 | -4.01835300 L  |
| C-C_R | -13.24950800 | -3.81770600  | -2.86195900 L  |

|       |              |              |               |
|-------|--------------|--------------|---------------|
| C-C_R | -16.34354600 | -6.15074400  | -5.99567200 L |
| C-C_R | -10.97204300 | -3.85905200  | -2.08512100 L |
| C-C_R | -16.22919500 | -4.87465200  | -5.44129100 L |
| C-C_R | -8.96471000  | -4.26770100  | -0.74965600 L |
| C-C_R | -12.25486200 | -3.29537000  | -2.08394100 L |
| C-C_R | -13.39795500 | -7.86185600  | -4.74607200 L |
| C-C_R | -17.49135700 | -6.47960000  | -6.75371600 L |
| C-C_R | -9.45483300  | -1.76476300  | 0.47936200 L  |
| C-C_R | -9.91198100  | -2.01789400  | -0.79735800 L |
| C-C_R | -12.20641500 | -9.28314800  | -3.21684500 L |
| C-C_R | -13.12384400 | -8.27813800  | -3.45485500 L |
| C-C_R | -11.51831900 | -9.85777100  | -4.27483600 L |
| C-C_R | -17.26846700 | -3.93570500  | -5.65774000 L |
| C-C_R | -10.51127200 | -12.06813200 | -4.64507100 L |
| C-C_R | -9.35766900  | -5.25363800  | 0.11126200 L  |
| C-C_R | -11.83297000 | -9.49296100  | -5.55798000 L |
| C-C_R | -12.78137500 | -8.50498200  | -5.79480100 L |
| C-C_R | -7.62138800  | -4.08240500  | -1.00739500 L |
| C-C_R | -18.37713100 | -4.27664000  | -6.38304700 L |
| C-C_R | -18.48632700 | -5.54838100  | -6.93508400 L |
| C-C_R | -17.12601900 | -2.62775000  | -5.08649900 L |
| N-N_R | -17.03869900 | -1.58329900  | -4.62931200 L |
| C-C_R | -10.28641200 | -0.94824300  | -1.59181100 L |
| C-C_R | -9.47542000  | -10.44762300 | -3.09207900 L |
| C-C_R | -6.69657300  | -4.88858600  | -0.38041100 L |
| C-C_R | -17.60764600 | -7.79226400  | -7.33918900 L |
| C-C_R | -8.42344600  | -6.06228300  | 0.72852900 L  |
| N-N_R | -17.73438200 | -8.81499100  | -7.81741100 L |
| C-C_R | -9.73019500  | 0.57481900   | 0.17171400 L  |
| C-C_R | -11.70128300 | -12.75543100 | -4.74150500 L |
| C-C_R | -7.08499100  | -5.87337700  | 0.47308700 L  |
| C-C_R | -9.34675900  | -0.48196700  | 0.95021700 L  |
| C-C_R | -9.36480600  | -12.64517800 | -5.17174600 L |
| C-C_R | -11.74395400 | -14.00518900 | -5.33474100 L |
| C-C_R | -10.21054900 | 0.33405900   | -1.07565400 L |
| C-C_R | -7.89444300  | -11.03588400 | -1.38534500 L |
| C-C_R | -8.85505200  | -11.42200700 | -2.30544300 L |
| C-C_R | -9.10229800  | -9.13132500  | -2.91432800 L |
| C-C_R | -9.42454700  | -13.91068600 | -5.74983000 L |
| C-C_R | -10.61122800 | -14.58230800 | -5.82509500 L |
| C-C_R | -8.15468000  | -8.79568500  | -1.96240600 L |
| C-C_R | -7.54064100  | -9.75460300  | -1.19652600 L |
| N-N_R | -14.61875900 | -10.50231500 | 3.51146100 L  |
| N-N_R | -14.85761700 | -13.08748100 | 2.44785300 L  |

|       |              |              |              |
|-------|--------------|--------------|--------------|
| N-N_R | -9.40995300  | -9.34938400  | 6.92852400 L |
| C-C_R | -13.67576200 | -11.41126700 | 3.74276000 L |
| C-C_R | -10.24336800 | -10.96399700 | 5.32850500 L |
| C-C_R | -12.53204300 | -10.93412500 | 4.54855800 L |
| C-C_R | -11.24180300 | -11.48823300 | 4.53803600 L |
| C-C_R | -13.82974600 | -12.75880700 | 3.21063200 L |
| N-N_R | -9.95070000  | -16.79273100 | 4.20884700 L |
| C-C_R | -12.72673400 | -9.81528700  | 5.36456200 L |
| C-C_R | -15.82077300 | -12.14832500 | 2.23084900 L |
| C-C_R | -10.44922700 | -9.85590000  | 6.14207900 L |
| C-C_R | -15.70642600 | -10.87082000 | 2.78517700 L |
| C-C_R | -8.44189500  | -10.26454800 | 7.47754400 L |
| C-C_R | -11.73209300 | -9.29153900  | 6.14252700 L |
| C-C_R | -12.87518100 | -13.85943800 | 3.48045000 L |
| C-C_R | -16.96854100 | -12.47644700 | 1.47348400 L |
| C-C_R | -8.93205900  | -7.76234400  | 8.70588300 L |
| C-C_R | -9.38916600  | -8.01474100  | 7.42984200 L |
| C-C_R | -11.68360000 | -15.27999600 | 5.01035500 L |
| C-C_R | -12.60107100 | -14.27571900 | 4.77166700 L |
| C-C_R | -10.99559200 | -15.85467300 | 3.95095300 L |
| C-C_R | -16.74565100 | -9.93255300  | 2.56946000 L |
| C-C_R | -9.98845600  | -18.06498000 | 3.58212900 L |
| C-C_R | -8.83485300  | -11.25048500 | 8.33846200 L |
| C-C_R | -11.31019700 | -15.49054200 | 2.66854200 L |
| C-C_R | -12.25860100 | -14.50256300 | 2.43172100 L |
| C-C_R | -7.09857300  | -10.07925300 | 7.21980500 L |
| C-C_R | -17.85435800 | -10.27422100 | 1.84347400 L |
| C-C_R | -17.96360000 | -11.54528200 | 1.29070500 L |
| C-C_R | -16.60325000 | -8.62391800  | 3.13996900 L |
| N-N_R | -16.51588400 | -7.58014700  | 3.59788800 L |
| C-C_R | -9.76363900  | -6.94582500  | 6.63471100 L |
| C-C_R | -8.95264700  | -16.44520500 | 5.13444300 L |
| C-C_R | -6.17380000  | -10.88616700 | 7.84611100 L |
| C-C_R | -17.08483100 | -13.78911100 | 0.88801100 L |
| C-C_R | -7.90067700  | -12.05845100 | 8.95499700 L |
| N-N_R | -17.21160900 | -14.81257300 | 0.40911100 L |
| C-C_R | -9.20737900  | -5.42202800  | 8.39891400 L |
| C-C_R | -11.17846700 | -18.75227800 | 3.48569500 L |
| C-C_R | -6.56217500  | -11.87022400 | 8.70028700 L |
| C-C_R | -8.82394300  | -6.47881500  | 9.17741600 L |
| C-C_R | -8.84203300  | -18.64276000 | 3.05477600 L |
| C-C_R | -11.22113800 | -20.00203700 | 2.89245900 L |
| C-C_R | -9.68777500  | -5.66352200  | 7.15086700 L |
| C-C_R | -7.37162800  | -17.03273100 | 6.84185500 L |

|       |              |              |               |
|-------|--------------|--------------|---------------|
| C-C_R | -8.33232600  | -17.41890900 | 5.92034700 L  |
| C-C_R | -8.57948200  | -15.12817300 | 5.31287200 L  |
| C-C_R | -8.90173200  | -19.90753400 | 2.47737000 L  |
| C-C_R | -10.08841300 | -20.57915600 | 2.40210500 L  |
| C-C_R | -7.63190600  | -14.79326600 | 6.26411500 L  |
| C-C_R | -7.01786800  | -15.75218400 | 7.02999600 L  |
| N-N_R | -2.59270300  | 16.08226700  | -1.19579800 L |
| N-N_R | -2.69920100  | 18.66648700  | -0.11108000 L |
| N-N_R | 2.14766100   | 14.93474800  | -5.24130400 L |
| C-C_R | -1.68741900  | 16.99162700  | -1.54439900 L |
| C-C_R | 1.52007100   | 16.54851300  | -3.54768400 L |
| C-C_R | -0.65346800  | 16.51583100  | -2.48760100 L |
| C-C_R | 0.62722600   | 17.07084800  | -2.63856200 L |
| C-C_R | -1.77486500  | 18.33907300  | -0.99562100 L |
| N-N_R | 1.94388900   | 22.37763600  | -2.47465000 L |
| C-C_R | -0.94680600  | 15.39669200  | -3.27281200 L |
| C-C_R | -3.62623900  | 17.72548300  | 0.22592400 L  |
| C-C_R | 1.21494700   | 15.44010000  | -4.32901700 L |
| C-C_R | -3.58090700  | 16.44949000  | -0.33853300 L |
| C-C_R | 3.03690900   | 15.85106100  | -5.90751400 L |
| C-C_R | -0.05819300  | 14.87410600  | -4.16960400 L |
| C-C_R | -0.86318400  | 19.44012200  | -1.38387400 L |
| C-C_R | -4.66916000  | 18.05293200  | 1.12078000 L  |
| C-C_R | 2.40031500   | 13.34816000  | -7.06475800 L |
| C-C_R | 2.10700300   | 13.60014800  | -5.73995200 L |
| C-C_R | 0.12490000   | 20.86202700  | -3.05130900 L |
| C-C_R | -0.75305900  | 19.85664100  | -2.69933600 L |
| C-C_R | 0.94085400   | 21.43831300  | -2.08753900 L |
| C-C_R | -4.58266500  | 15.50922800  | 0.00528300 L  |
| C-C_R | 1.98373000   | 23.64994000  | -1.84664800 L |
| C-C_R | 2.53872900   | 16.83650100  | -6.71078800 L |
| C-C_R | 0.79043000   | 21.07321500  | -0.77505000 L |
| C-C_R | -0.12051400  | 20.08476700  | -0.42164500 L |
| C-C_R | 4.40319800   | 15.66743900  | -5.82074400 L |
| C-C_R | -5.59170000  | 15.84890900  | 0.86562700 L  |
| C-C_R | -5.63320500  | 17.12055700  | 1.42717300 L  |
| C-C_R | -4.51149200  | 14.20072600  | -0.57870200 L |
| N-N_R | -4.48200100  | 13.15708100  | -1.04257800 L |
| C-C_R | 1.83671600   | 12.53009900  | -4.90482000 L |
| C-C_R | 2.81815900   | 22.03058700  | -3.51764900 L |
| C-C_R | 5.24096700   | 16.47476200  | -6.55752500 L |
| C-C_R | -4.71350400  | 19.36481700  | 1.71712400 L  |
| C-C_R | 3.38696100   | 17.64624700  | -7.44052300 L |
| N-N_R | -4.78034200  | 20.38815900  | 2.20824100 L  |

|       |             |             |               |
|-------|-------------|-------------|---------------|
| C-C_R | 2.16773400  | 11.00758500 | -6.72432700 L |
| C-C_R | 0.81334600  | 24.33572700 | -1.60269600 L |
| C-C_R | 4.74705000  | 17.45895400 | -7.35676600 L |
| C-C_R | 2.44993100  | 12.06404900 | -7.54550900 L |
| C-C_R | 3.18559400  | 24.22843700 | -1.46814500 L |
| C-C_R | 0.84408400  | 25.58621100 | -1.00802600 L |
| C-C_R | 1.84768000  | 11.24785100 | -5.42645500 L |
| C-C_R | 4.17034900  | 22.62065900 | -5.40945700 L |
| C-C_R | 3.33253400  | 23.00567100 | -4.37588300 L |
| C-C_R | 3.16655900  | 20.71400000 | -3.74160600 L |
| C-C_R | 3.19743100  | 25.49391500 | -0.88703800 L |
| C-C_R | 2.02974700  | 26.16476200 | -0.66395500 L |
| C-C_R | 3.98742000  | 20.38086600 | -4.80516800 L |
| C-C_R | 4.50014000  | 21.34048000 | -5.64214300 L |
| N-N_R | -2.06993000 | 10.08468600 | 7.03072400 L  |
| N-N_R | -2.17638500 | 12.66963900 | 8.11612000 L  |
| N-N_R | 2.67043500  | 8.93716700  | 2.98521800 L  |
| C-C_R | -1.16460300 | 10.99477900 | 6.68280100 L  |
| C-C_R | 2.04284400  | 10.55093200 | 4.67883800 L  |
| C-C_R | -0.13065200 | 10.51898300 | 5.73959900 L  |
| C-C_R | 1.15004100  | 11.07400000 | 5.58863800 L  |
| C-C_R | -1.25209200 | 12.34149200 | 7.23090100 L  |
| N-N_R | 2.46670500  | 16.38078800 | 5.75255000 L  |
| C-C_R | -0.42403300 | 9.39911000  | 4.95370900 L  |
| C-C_R | -3.10351200 | 11.72858200 | 8.45171400 L  |
| C-C_R | 1.73772000  | 9.44251900  | 3.89750500 L  |
| C-C_R | -3.05813400 | 10.45190900 | 7.88798900 L  |
| C-C_R | 3.55972500  | 9.85421300  | 2.31968600 L  |
| C-C_R | 0.46462300  | 8.87725900  | 4.05759600 L  |
| C-C_R | -0.34036800 | 13.44327500 | 6.84332600 L  |
| C-C_R | -4.14634500 | 12.05608400 | 9.34798000 L  |
| C-C_R | 2.92313100  | 7.35131300  | 1.16244100 L  |
| C-C_R | 2.62977600  | 7.60256700  | 2.48657000 L  |
| C-C_R | 0.64771500  | 14.86517900 | 5.17589100 L  |
| C-C_R | -0.23028500 | 13.85906000 | 5.52718600 L  |
| C-C_R | 1.46367000  | 15.44146500 | 6.13966100 L  |
| C-C_R | -4.05985000 | 9.51238100  | 8.23248300 L  |
| C-C_R | 2.50645700  | 17.65303800 | 6.37914200 L  |
| C-C_R | 3.06150200  | 10.83892000 | 1.51573300 L  |
| C-C_R | 1.31315700  | 15.07631400 | 7.45073900 L  |
| C-C_R | 0.40230200  | 14.08792000 | 7.80555500 L  |
| C-C_R | 4.92601400  | 9.67059100  | 2.40645600 L  |
| C-C_R | -5.06892700 | 9.85132700  | 9.09214800 L  |
| C-C_R | -5.11043200 | 11.12297500 | 9.65369400 L  |

|       |             |             |               |
|-------|-------------|-------------|---------------|
| C-C_R | -3.98867600 | 8.20387800  | 7.64849800 L  |
| N-N_R | -3.95927400 | 7.16017900  | 7.18321100 L  |
| C-C_R | 2.35948900  | 6.53251800  | 3.32170200 L  |
| C-C_R | 3.34088600  | 16.03368500 | 4.70814100 L  |
| C-C_R | 5.76374000  | 10.47718100 | 1.66899700 L  |
| C-C_R | -4.19068900 | 13.36796900 | 9.94432400 L  |
| C-C_R | 3.90973400  | 11.64866600 | 0.78599900 L  |
| N-N_R | -4.25757300 | 14.39199100 | 10.43470800 L |
| C-C_R | 2.69046000  | 5.01068300  | 1.50146300 L  |
| C-C_R | 1.33616200  | 18.33887900 | 6.62450400 L  |
| C-C_R | 5.26986600  | 11.46210700 | 0.87043400 L  |
| C-C_R | 2.97274700  | 6.06720100  | 0.68169100 L  |
| C-C_R | 3.70836700  | 18.23085600 | 6.75837700 L  |
| C-C_R | 1.36685700  | 19.58863000 | 7.21849500 L  |
| C-C_R | 2.37049500  | 5.25100300  | 2.80074500 L  |
| C-C_R | 4.69307500  | 16.62375700 | 2.81633300 L  |
| C-C_R | 3.85535000  | 17.00882300 | 3.85131700 L  |
| C-C_R | 3.68932800  | 14.71783200 | 4.48486100 L  |
| C-C_R | 3.72015700  | 19.49701400 | 7.33875100 L  |
| C-C_R | 2.55252000  | 20.16718100 | 7.56256700 L  |
| C-C_R | 4.51023500  | 14.38401800 | 3.42203200 L  |
| C-C_R | 5.02295500  | 15.34363200 | 2.58505700 L  |
| N-N_R | -1.54715600 | 4.08710400  | 15.25724500 L |
| N-N_R | -1.65361200 | 6.67205800  | 16.34264200 L |
| N-N_R | 3.19325000  | 2.94031900  | 11.21241700 L |
| C-C_R | -0.64183000 | 4.99719800  | 14.90932300 L |
| C-C_R | 2.56557100  | 4.55403000  | 12.90462800 L |
| C-C_R | 0.39212100  | 4.52140200  | 13.96612000 L |
| C-C_R | 1.67281400  | 5.07641900  | 13.81516000 L |
| C-C_R | -0.72936600 | 6.34459000  | 15.45669000 L |
| N-N_R | 2.98947800  | 10.38320700 | 13.97907200 L |
| C-C_R | 0.09878200  | 3.40226200  | 13.18090900 L |
| C-C_R | -2.58069700 | 5.73173400  | 16.67891400 L |
| C-C_R | 2.26044700  | 3.44561700  | 12.12329400 L |
| C-C_R | -2.53531800 | 4.45506100  | 16.11518900 L |
| C-C_R | 4.08249800  | 3.85663100  | 10.54620800 L |
| C-C_R | 0.98739600  | 2.87967700  | 12.28411700 L |
| C-C_R | 0.18235900  | 7.44637300  | 15.06911500 L |
| C-C_R | -3.62357200 | 6.05850300  | 17.57450200 L |
| C-C_R | 3.44590400  | 1.35373100  | 9.38896300 L  |
| C-C_R | 3.15259200  | 1.60571900  | 10.71377000 L |
| C-C_R | 1.17044200  | 8.86827800  | 13.40168000 L |
| C-C_R | 0.29248400  | 7.86289200  | 13.75365400 L |
| C-C_R | 1.98644300  | 9.44388400  | 14.36618300 L |

|       |             |             |               |
|-------|-------------|-------------|---------------|
| C-C_R | -3.53707600 | 3.51479900  | 16.45900500 L |
| C-C_R | 3.02923000  | 11.65545700 | 14.60566300 L |
| C-C_R | 3.58422900  | 4.84201800  | 9.74152300 L  |
| C-C_R | 1.83597300  | 9.07946600  | 15.67793900 L |
| C-C_R | 0.92507500  | 8.09033800  | 16.03207700 L |
| C-C_R | 5.44878700  | 3.67301000  | 10.63297800 L |
| C-C_R | -4.54615800 | 3.85515900  | 17.31861600 L |
| C-C_R | -4.58761600 | 5.12612800  | 17.88089400 L |
| C-C_R | -3.46590300 | 2.20629700  | 15.87502000 L |
| N-N_R | -3.43645900 | 1.16333100  | 15.41041100 L |
| C-C_R | 2.88230400  | 0.53567000  | 11.54890200 L |
| C-C_R | 3.86370100  | 10.03683700 | 12.93534100 L |
| C-C_R | 6.28650900  | 4.48101300  | 9.89546400 L  |
| C-C_R | -3.66796200 | 7.37106700  | 18.17011400 L |
| C-C_R | 4.43250700  | 5.65108500  | 9.01252000 L  |
| N-N_R | -3.73479900 | 8.39440900  | 18.66123000 L |
| C-C_R | 3.21323400  | -0.98689800 | 9.72798500 L  |
| C-C_R | 1.85893500  | 12.34129800 | 14.85102600 L |
| C-C_R | 5.79263900  | 5.46452500  | 9.09695500 L  |
| C-C_R | 3.49547400  | 0.07029900  | 8.90748000 L  |
| C-C_R | 4.23113600  | 12.23468700 | 14.98484500 L |
| C-C_R | 1.88963000  | 13.59104900 | 15.44501700 L |
| C-C_R | 2.89326900  | -0.74657800 | 11.02726700 L |
| C-C_R | 5.21584900  | 10.62617600 | 11.04285500 L |
| C-C_R | 4.37812300  | 11.01124200 | 12.07783800 L |
| C-C_R | 4.21210100  | 8.72025100  | 12.71138300 L |
| C-C_R | 4.24293000  | 13.49943200 | 15.56527300 L |
| C-C_R | 3.07529400  | 14.16960000 | 15.78908800 L |
| C-C_R | 5.03300800  | 8.38643700  | 11.64855400 L |
| C-C_R | 5.54572900  | 9.34605100  | 10.81157800 L |
| N-N_R | -2.66620100 | -0.24590700 | -2.52050900 L |
| N-N_R | -2.77265700 | 2.33904600  | -1.43511200 L |
| N-N_R | 2.07416300  | -1.39342600 | -6.56601500 L |
| C-C_R | -1.76087500 | 0.66418700  | -2.86843100 L |
| C-C_R | 1.44657200  | 0.22033900  | -4.87239400 L |
| C-C_R | -0.72692400 | 0.18839000  | -3.81163400 L |
| C-C_R | 0.55376900  | 0.74340700  | -3.96259400 L |
| C-C_R | -1.84836400 | 2.01089900  | -2.32033200 L |
| N-N_R | 1.87043300  | 6.05019600  | -3.79868200 L |
| C-C_R | -1.02030500 | -0.93148300 | -4.59752300 L |
| C-C_R | -3.69978400 | 1.39798900  | -1.09951800 L |
| C-C_R | 1.14144800  | -0.88807400 | -5.65372800 L |
| C-C_R | -3.65440600 | 0.12131600  | -1.66324300 L |
| C-C_R | 2.96345300  | -0.47638000 | -7.23154600 L |



|       |             |             |               |
|-------|-------------|-------------|---------------|
| C-C_R | -0.13164900 | -1.45333400 | -5.49363700 L |
| C-C_R | -0.93664000 | 3.11268200  | -2.70790700 L |
| C-C_R | -4.74261700 | 1.72549100  | -0.20325200 L |
| C-C_R | 2.32685900  | -2.97928000 | -8.38879100 L |
| C-C_R | 2.03350400  | -2.72802600 | -7.06466300 L |
| C-C_R | 0.05144400  | 4.53458700  | -4.37534200 L |
| C-C_R | -0.82655700 | 3.52846700  | -4.02404600 L |
| C-C_R | 0.86739800  | 5.11087200  | -3.41157100 L |
| C-C_R | -4.65612100 | -0.81821200 | -1.31874900 L |
| C-C_R | 1.91018500  | 7.32244600  | -3.17209100 L |
| C-C_R | 2.46523100  | 0.50832700  | -8.03549900 L |
| C-C_R | 0.71688500  | 4.74572100  | -2.10049300 L |
| C-C_R | -0.19397000 | 3.75732700  | -1.74567700 L |
| C-C_R | 4.32974200  | -0.66000100 | -7.14477600 L |
| C-C_R | -5.66519900 | -0.47926500 | -0.45908400 L |
| C-C_R | -5.70670400 | 0.79238300  | 0.10246200 L  |
| C-C_R | -4.58494800 | -2.12671500 | -1.90273400 L |
| N-N_R | -4.55554600 | -3.17041400 | -2.36802100 L |
| C-C_R | 1.76321700  | -3.79807500 | -6.22953000 L |
| C-C_R | 2.74461400  | 5.70309200  | -4.84309200 L |
| C-C_R | 5.16746800  | 0.14658800  | -7.88223600 L |
| C-C_R | -4.78696100 | 3.03737600  | 0.39309200 L  |
| C-C_R | 3.31346200  | 1.31807300  | -8.76523400 L |
| N-N_R | -4.85384400 | 4.06139800  | 0.88347600 L  |
| C-C_R | 2.09418900  | -5.31991000 | -8.04976900 L |
| C-C_R | 0.73989000  | 8.00828600  | -2.92672800 L |
| C-C_R | 4.67359400  | 1.13151400  | -8.68079900 L |
| C-C_R | 2.37647500  | -4.26339200 | -8.86954100 L |
| C-C_R | 3.11209500  | 7.90026300  | -2.79285500 L |
| C-C_R | 0.77058500  | 9.25803700  | -2.33273700 L |
| C-C_R | 1.77422300  | -5.07959000 | -6.75048700 L |
| C-C_R | 4.09680400  | 6.29316400  | -6.73489900 L |
| C-C_R | 3.25907800  | 6.67823100  | -5.69991600 L |
| C-C_R | 3.09305600  | 4.38724000  | -5.06637100 L |
| C-C_R | 3.12388500  | 9.16642100  | -2.21248100 L |
| C-C_R | 1.95624900  | 9.83658800  | -1.98866600 L |
| C-C_R | 3.91396300  | 4.05342500  | -6.12920000 L |
| C-C_R | 4.42668400  | 5.01304000  | -6.96617600 L |
| N-N_R | -2.14342800 | -6.24348800 | 5.70601300 L  |
| N-N_R | -2.24988400 | -3.65853500 | 6.79140900 L  |
| N-N_R | 2.59697800  | -7.39027300 | 1.66118500 L  |
| C-C_R | -1.23810200 | -5.33339500 | 5.35809100 L  |
| C-C_R | 1.96929900  | -5.77656300 | 3.35339500 L  |
| C-C_R | -0.20415100 | -5.80919100 | 4.41488800 L  |

|       |             |              |               |
|-------|-------------|--------------|---------------|
| C-C_R | 1.07654300  | -5.25417400  | 4.26392800 L  |
| C-C_R | -1.32563700 | -3.98600300  | 5.90545800 L  |
| N-N_R | 2.39320600  | 0.05261400   | 4.42783900 L  |
| C-C_R | -0.49748900 | -6.92833000  | 3.62967700 L  |
| C-C_R | -3.17696900 | -4.59885900  | 7.12768200 L  |
| C-C_R | 1.66417500  | -6.88497600  | 2.57206200 L  |
| C-C_R | -3.13159000 | -5.87553200  | 6.56395700 L  |
| C-C_R | 3.48622600  | -6.47396100  | 0.99497500 L  |
| C-C_R | 0.39112400  | -7.45091500  | 2.73288500 L  |
| C-C_R | -0.41391300 | -2.88422000  | 5.51788300 L  |
| C-C_R | -4.21984300 | -4.27209000  | 8.02326900 L  |
| C-C_R | 2.84963200  | -8.97686100  | -0.16226900 L |
| C-C_R | 2.55632000  | -8.72487400  | 1.16253700 L  |
| C-C_R | 0.57417000  | -1.46231500  | 3.85044800 L  |
| C-C_R | -0.30378800 | -2.46770100  | 4.20242200 L  |
| C-C_R | 1.39017100  | -0.88670900  | 4.81495100 L  |
| C-C_R | -4.13334800 | -6.81579300  | 6.90777300 L  |
| C-C_R | 2.43295800  | 1.32486400   | 5.05443100 L  |
| C-C_R | 2.98795700  | -5.48857500  | 0.19029100 L  |
| C-C_R | 1.23970100  | -1.25112700  | 6.12670700 L  |
| C-C_R | 0.32880300  | -2.24025500  | 6.48084400 L  |
| C-C_R | 4.85251500  | -6.65758300  | 1.08174600 L  |
| C-C_R | -5.14243000 | -6.47543400  | 7.76738400 L  |
| C-C_R | -5.18388800 | -5.20446500  | 8.32966200 L  |
| C-C_R | -4.06217500 | -8.12429600  | 6.32378700 L  |
| N-N_R | -4.03273100 | -9.16726100  | 5.85917900 L  |
| C-C_R | 2.28603300  | -9.79492200  | 1.99767000 L  |
| C-C_R | 3.26742900  | -0.29375600  | 3.38410800 L  |
| C-C_R | 5.69023700  | -5.84958000  | 0.34423200 L  |
| C-C_R | -4.26423400 | -2.95952500  | 8.61888100 L  |
| C-C_R | 3.83623600  | -4.67950800  | -0.53871200 L |
| N-N_R | -4.33107100 | -1.93618400  | 9.10999800 L  |
| C-C_R | 2.61696200  | -11.31749100 | 0.17675200 L  |
| C-C_R | 1.26266300  | 2.01070500   | 5.29979400 L  |
| C-C_R | 5.19636700  | -4.86606800  | -0.45427700 L |
| C-C_R | 2.89920200  | -10.26029400 | -0.64375200 L |
| C-C_R | 3.63486400  | 1.90409500   | 5.43361200 L  |
| C-C_R | 1.29335800  | 3.26045600   | 5.89378500 L  |
| C-C_R | 2.29699700  | -11.07717100 | 1.47603500 L  |
| C-C_R | 4.61957700  | 0.29558300   | 1.49162200 L  |
| C-C_R | 3.78185100  | 0.68064900   | 2.52660600 L  |
| C-C_R | 3.61583000  | -1.61034200  | 3.16015100 L  |
| C-C_R | 3.64665900  | 3.16884000   | 6.01404100 L  |
| C-C_R | 2.47902200  | 3.83900700   | 6.23785600 L  |

|       |             |             |                |
|-------|-------------|-------------|----------------|
| C-C_R | 4.43673700  | -1.94415600 | 2.09732200 L   |
| C-C_R | 4.94945700  | -0.98454200 | 1.26034600 L   |
| N-N_R | 14.30496200 | 10.92759300 | -7.05641600 L  |
| N-N_R | 14.54377700 | 13.51202600 | -5.99348700 L  |
| N-N_R | 9.09611300  | 9.77392900  | -10.47415800 L |
| C-C_R | 13.36192200 | 11.83581200 | -7.28839400 L  |
| C-C_R | 9.92961700  | 11.38859600 | -8.87272800 L  |
| C-C_R | 12.21820400 | 11.35867000 | -8.09419200 L  |
| C-C_R | 10.92801000 | 11.91209900 | -8.08293700 L  |
| C-C_R | 13.51599500 | 13.18340700 | -6.75485500 L  |
| N-N_R | 9.63686000  | 17.21727600 | -7.75448000 L  |
| C-C_R | 12.41289500 | 10.23983200 | -8.91019600 L  |
| C-C_R | 15.50697900 | 12.57219100 | -5.77575100 L  |
| C-C_R | 10.13547600 | 10.28049900 | -9.68630300 L  |
| C-C_R | 15.39262900 | 11.29609900 | -6.33013200 L  |
| C-C_R | 8.12805500  | 10.68909300 | -11.02317700 L |
| C-C_R | 11.41825400 | 9.71608400  | -9.68816000 L  |
| C-C_R | 12.56138800 | 14.28330300 | -7.02535100 L  |
| C-C_R | 16.65470100 | 12.90099200 | -5.01911800 L  |
| C-C_R | 8.61822000  | 8.18688900  | -12.25151700 L |
| C-C_R | 9.07541500  | 8.43934000  | -10.97406500 L |
| C-C_R | 11.36980700 | 15.70386100 | -8.55525600 L  |
| C-C_R | 12.28727800 | 14.69958500 | -8.31656900 L  |
| C-C_R | 10.68175300 | 16.27921800 | -7.49658700 L  |
| C-C_R | 16.43181200 | 10.35709800 | -6.11509300 L  |
| C-C_R | 9.67470500  | 18.48957900 | -7.12635300 L  |
| C-C_R | 8.52110200  | 11.67508400 | -11.88268500 L |
| C-C_R | 10.99640400 | 15.91440800 | -6.21344400 L  |
| C-C_R | 11.94476200 | 14.92710800 | -5.97735500 L  |
| C-C_R | 6.78473300  | 10.50379800 | -10.76543900 L |
| C-C_R | 17.54056500 | 10.69808600 | -5.38837600 L  |
| C-C_R | 17.64976000 | 11.96982700 | -4.83633900 L  |
| C-C_R | 16.28941000 | 9.04846300  | -6.68560300 L  |
| N-N_R | 16.20213300 | 8.00474600  | -7.14211100 L  |
| C-C_R | 9.44984600  | 7.36969000  | -10.17961300 L |
| C-C_R | 8.63885400  | 16.86907000 | -8.67934400 L  |
| C-C_R | 5.86000700  | 11.31003300 | -11.39101200 L |
| C-C_R | 16.77103800 | 14.21297700 | -4.43291200 L  |
| C-C_R | 7.58687900  | 12.48373000 | -12.49995300 L |
| N-N_R | 16.89781500 | 15.23643800 | -3.95401200 L  |
| C-C_R | 8.89362800  | 5.84662700  | -11.94313800 L |
| C-C_R | 10.86462700 | 19.17682300 | -7.03132800 L  |
| C-C_R | 6.24833600  | 12.29476900 | -12.24592100 L |
| C-C_R | 8.51015000  | 6.90268000  | -12.72231800 L |

|       |             |             |                |
|-------|-------------|-------------|----------------|
| C-C_R | 8.52824000  | 19.06662500 | -6.59967700 L  |
| C-C_R | 10.90734100 | 20.42731600 | -6.43741500 L  |
| C-C_R | 9.37398200  | 6.08738800  | -10.69576900 L |
| C-C_R | 7.05787700  | 17.45733000 | -10.38607800 L |
| C-C_R | 8.01848600  | 17.84345400 | -9.46598000 L  |
| C-C_R | 8.26568900  | 15.55203800 | -8.85777400 L  |
| C-C_R | 8.58798100  | 20.33213300 | -6.02159300 L  |
| C-C_R | 9.77461500  | 21.00443400 | -5.94706000 L  |
| C-C_R | 7.31806700  | 15.21781100 | -9.80974900 L  |
| C-C_R | 6.70402800  | 16.17672900 | -10.57563000 L |
| N-N_R | 14.82773500 | 4.93001200  | 1.17010500 L   |
| N-N_R | 15.06659300 | 7.51517900  | 2.23371300 L   |
| N-N_R | 9.61888600  | 3.77634700  | -2.24763600 L  |
| C-C_R | 13.88473800 | 5.83896400  | 0.93880600 L   |
| C-C_R | 10.45239000 | 5.39101400  | -0.64620600 L  |
| C-C_R | 12.74101900 | 5.36182200  | 0.13300800 L   |
| C-C_R | 11.45082600 | 5.91525100  | 0.14426300 L   |
| C-C_R | 14.03876800 | 7.18582500  | 1.47166600 L   |
| N-N_R | 10.15967600 | 11.22042800 | 0.47272000 L   |
| C-C_R | 12.93566800 | 4.24225100  | -0.68367400 L  |
| C-C_R | 16.02970600 | 6.57528900  | 2.45003900 L   |
| C-C_R | 10.65825000 | 4.28291700  | -1.45978100 L  |
| C-C_R | 15.91540200 | 5.29851800  | 1.89639000 L   |
| C-C_R | 8.65087000  | 4.69224600  | -2.79597700 L  |
| C-C_R | 11.94106900 | 3.71923600  | -1.46096000 L  |
| C-C_R | 13.08420400 | 8.28645500  | 1.20184900 L   |
| C-C_R | 17.17751700 | 6.90414500  | 3.20808200 L   |
| C-C_R | 9.14103500  | 2.19004200  | -4.02431700 L  |
| C-C_R | 9.59818800  | 2.44175900  | -2.74754300 L  |
| C-C_R | 11.89262200 | 9.70701400  | -0.32805600 L  |
| C-C_R | 12.81005100 | 8.70200300  | -0.09004700 L  |
| C-C_R | 11.20456800 | 10.28237000 | 0.73061300 L   |
| C-C_R | 16.95462700 | 4.36025000  | 2.11210700 L   |
| C-C_R | 10.19743200 | 12.49267700 | 1.09943700 L   |
| C-C_R | 9.04387600  | 5.67750300  | -3.65616400 L  |
| C-C_R | 11.51913000 | 9.91750600  | 2.01234600 L   |
| C-C_R | 12.46757700 | 8.93026100  | 2.24984500 L   |
| C-C_R | 7.30754900  | 4.50695000  | -2.53823900 L  |
| C-C_R | 18.06333800 | 4.70050500  | 2.83814600 L   |
| C-C_R | 18.17253400 | 5.97224600  | 3.39018300 L   |
| C-C_R | 16.81222600 | 3.05161600  | 1.54159700 L   |
| N-N_R | 16.72486000 | 2.00784400  | 1.08367800 L   |
| C-C_R | 9.97261900  | 1.37210900  | -1.95309100 L  |
| C-C_R | 9.16158000  | 10.87216800 | -0.45355500 L  |

|       |             |             |               |
|-------|-------------|-------------|---------------|
| C-C_R | 6.38278000  | 5.31245100  | -3.16449100 L |
| C-C_R | 17.29385300 | 8.21612900  | 3.79428800 L  |
| C-C_R | 8.10965200  | 6.48614800  | -4.27343100 L |
| N-N_R | 17.42058400 | 9.24027000  | 4.27245600 L  |
| C-C_R | 9.41635500  | -0.15027400 | -3.71734800 L |
| C-C_R | 11.38744300 | 13.17997600 | 1.19587200 L  |
| C-C_R | 6.77115100  | 6.29792200  | -4.01872100 L |
| C-C_R | 9.03296500  | 0.90583200  | -4.49511800 L |
| C-C_R | 9.05101300  | 13.06904400 | 1.62684500 L  |
| C-C_R | 11.43011400 | 14.42973400 | 1.78910700 L  |
| C-C_R | 9.89679800  | 0.09054000  | -2.46856900 L |
| C-C_R | 7.58060400  | 11.46042900 | -2.16028900 L |
| C-C_R | 8.54130100  | 11.84660600 | -1.23878000 L |
| C-C_R | 8.78845800  | 9.55587000  | -0.63130600 L |
| C-C_R | 9.11070700  | 14.33523200 | 2.20419700 L  |
| C-C_R | 10.29738800 | 15.00685300 | 2.27946200 L  |
| C-C_R | 7.84088200  | 9.22096300  | -1.58254900 L |
| C-C_R | 7.22684300  | 10.17988200 | -2.34843000 L |
| N-N_R | 15.35050800 | -1.06757000 | 9.39662700 L  |
| N-N_R | 15.58936600 | 1.51759700  | 10.46023500 L |
| N-N_R | 10.14170200 | -2.22050100 | 5.97956400 L  |
| C-C_R | 14.40751100 | -0.15861800 | 9.16532800 L  |
| C-C_R | 10.97511700 | -0.60588700 | 7.57958300 L  |
| C-C_R | 13.26379200 | -0.63575900 | 8.35953000 L  |
| C-C_R | 11.97359900 | -0.08233000 | 8.37078400 L  |
| C-C_R | 14.56149500 | 1.18892300  | 9.69745600 L  |
| N-N_R | 10.68244900 | 5.22284700  | 8.69924100 L  |
| C-C_R | 13.45848400 | -1.75459700 | 7.54352600 L  |
| C-C_R | 16.55252200 | 0.57844100  | 10.67723900 L |
| C-C_R | 11.18097600 | -1.71398400 | 6.76600900 L  |
| C-C_R | 16.43821800 | -0.69833000 | 10.12359000 L |
| C-C_R | 9.17364400  | -1.30533600 | 5.43054400 L  |
| C-C_R | 12.46384200 | -2.27834500 | 6.76556100 L  |
| C-C_R | 13.60693100 | 2.28955400  | 9.42763800 L  |
| C-C_R | 17.70029000 | 0.90656300  | 11.43460400 L |
| C-C_R | 9.66380900  | -3.80754000 | 4.20220500 L  |
| C-C_R | 10.12100400 | -3.55508900 | 5.47965700 L  |
| C-C_R | 12.41534900 | 3.71011200  | 7.89773300 L  |
| C-C_R | 13.33282000 | 2.70583500  | 8.13642100 L  |
| C-C_R | 11.72734100 | 4.28478900  | 8.95713500 L  |
| C-C_R | 17.47740100 | -1.63733100 | 10.33862800 L |
| C-C_R | 10.72020500 | 6.49509600  | 9.32595900 L  |
| C-C_R | 9.56660200  | -0.31939900 | 4.56962600 L  |
| C-C_R | 12.04194600 | 3.92065800  | 10.23954600 L |

|       |              |             |                |
|-------|--------------|-------------|----------------|
| C-C_R | 12.99035100  | 2.93267900  | 10.47636700 L  |
| C-C_R | 7.83032200   | -1.49063100 | 5.68828300 L   |
| C-C_R | 18.58610700  | -1.29566300 | 11.06461400 L  |
| C-C_R | 18.69534900  | -0.02460200 | 11.61738300 L  |
| C-C_R | 17.33499900  | -2.94596600 | 9.76811900 L   |
| N-N_R | 17.24767500  | -3.98900300 | 9.31087800 L   |
| C-C_R | 10.49543400  | -4.62473900 | 6.27410900 L   |
| C-C_R | 9.68439600   | 4.87532100  | 7.77364500 L   |
| C-C_R | 6.90554900   | -0.68371700 | 5.06197700 L   |
| C-C_R | 17.81658000  | 2.21922700  | 12.02007700 L  |
| C-C_R | 8.63242600   | 0.48856700  | 3.95309100 L   |
| N-N_R | 17.94335800  | 3.24268900  | 12.49897700 L  |
| C-C_R | 9.93912800   | -6.14785600 | 4.50917400 L   |
| C-C_R | 11.91021600  | 7.18239400  | 9.42239300 L   |
| C-C_R | 7.29392500   | 0.30034000  | 4.20780100 L   |
| C-C_R | 9.55569200   | -5.09106900 | 3.73067200 L   |
| C-C_R | 9.57378200   | 7.07287600  | 9.85331200 L   |
| C-C_R | 11.95288700  | 8.43215300  | 10.01562900 L  |
| C-C_R | 10.41957100  | -5.90704100 | 5.75795300 L   |
| C-C_R | 8.10337700   | 5.46284700  | 6.06623300 L   |
| C-C_R | 9.06407500   | 5.84902400  | 6.98774100 L   |
| C-C_R | 9.31123100   | 3.55828900  | 7.59521600 L   |
| C-C_R | 9.63348100   | 8.33765000  | 10.43071800 L  |
| C-C_R | 10.82016200  | 9.00927200  | 10.50598300 L  |
| C-C_R | 8.36365600   | 3.22338200  | 6.64397300 L   |
| C-C_R | 7.74961700   | 4.18230000  | 5.87809200 L   |
| N-N_R | -10.27714900 | 10.91240800 | -5.50536100 L  |
| N-N_R | -10.03833400 | 13.49684100 | -4.44243100 L  |
| N-N_R | -15.48599700 | 9.75874300  | -8.92310200 L  |
| C-C_R | -11.22018800 | 11.82062600 | -5.73733800 L  |
| C-C_R | -14.65249400 | 11.37341000 | -7.32167200 L  |
| C-C_R | -12.36390700 | 11.34348400 | -6.54313600 L  |
| C-C_R | -13.65410000 | 11.89691300 | -6.53188100 L  |
| C-C_R | -11.06611600 | 13.16822100 | -5.20379900 L  |
| N-N_R | -14.94525000 | 17.20209100 | -6.20342500 L  |
| C-C_R | -12.16921600 | 10.22464700 | -7.35914000 L  |
| C-C_R | -9.07513100  | 12.55700500 | -4.22469500 L  |
| C-C_R | -14.44663400 | 10.26531300 | -8.13524700 L  |
| C-C_R | -9.18948200  | 11.28091300 | -4.77907600 L  |
| C-C_R | -16.45405600 | 10.67390800 | -9.47212100 L  |
| C-C_R | -13.16385700 | 9.70089800  | -8.13710500 L  |
| C-C_R | -12.02072200 | 14.26811800 | -5.47429600 L  |
| C-C_R | -7.92740900  | 12.88580700 | -3.46806200 L  |
| C-C_R | -15.96389100 | 8.17170400  | -10.70046100 L |

|       |              |             |                |
|-------|--------------|-------------|----------------|
| C-C_R | -15.50669600 | 8.42415500  | -9.42300900 L  |
| C-C_R | -13.21230400 | 15.68867600 | -7.00420000 L  |
| C-C_R | -12.29483300 | 14.68439900 | -6.76551300 L  |
| C-C_R | -13.90035800 | 16.26403300 | -5.94553100 L  |
| C-C_R | -8.15029900  | 10.34191200 | -4.56403800 L  |
| C-C_R | -14.90740500 | 18.47439400 | -5.57529700 L  |
| C-C_R | -16.06100800 | 11.65989900 | -10.33163000 L |
| C-C_R | -13.58570700 | 15.89922200 | -4.66238800 L  |
| C-C_R | -12.63734900 | 14.91192300 | -4.42629900 L  |
| C-C_R | -17.79737800 | 10.48861300 | -9.21438300 L  |
| C-C_R | -7.04154600  | 10.68290100 | -3.83732000 L  |
| C-C_R | -6.93235000  | 11.95464200 | -3.28528300 L  |
| C-C_R | -8.29270100  | 9.03327800  | -5.13454700 L  |
| N-N_R | -8.37997700  | 7.98956100  | -5.59105600 L  |
| C-C_R | -15.13226500 | 7.35450500  | -8.62855700 L  |
| C-C_R | -15.94325700 | 16.85388500 | -7.12828900 L  |
| C-C_R | -18.72210400 | 11.29484700 | -9.83995600 L  |
| C-C_R | -7.81107300  | 14.19779100 | -2.88185600 L  |
| C-C_R | -16.99523100 | 12.46854400 | -10.94889700 L |
| N-N_R | -7.68429500  | 15.22125300 | -2.40295600 L  |
| C-C_R | -15.68848200 | 5.83144200  | -10.39208200 L |
| C-C_R | -13.71748300 | 19.16163800 | -5.48027300 L  |
| C-C_R | -18.33377500 | 12.27958400 | -10.69486500 L |
| C-C_R | -16.07196100 | 6.88749500  | -11.17126200 L |
| C-C_R | -16.05387100 | 19.05144000 | -5.04862100 L  |
| C-C_R | -13.67477000 | 20.41213000 | -4.88635900 L  |
| C-C_R | -15.20812800 | 6.07220200  | -9.14471300 L  |
| C-C_R | -17.52423300 | 17.44214500 | -8.83502300 L  |
| C-C_R | -16.56362500 | 17.82826800 | -7.91492400 L  |
| C-C_R | -16.31642100 | 15.53685300 | -7.30671800 L  |
| C-C_R | -15.99413000 | 20.31694800 | -4.47053700 L  |
| C-C_R | -14.80749500 | 20.98924900 | -4.39600400 L  |
| C-C_R | -17.26404400 | 15.20262600 | -8.25869300 L  |
| C-C_R | -17.87808300 | 16.16154400 | -9.02457400 L  |
| N-N_R | -9.75437500  | 4.91482600  | 2.72116100 L   |
| N-N_R | -9.51551800  | 7.49999300  | 3.78476900 L   |
| N-N_R | -14.96322400 | 3.76116200  | -0.69658000 L  |
| C-C_R | -10.69737300 | 5.82377800  | 2.48986200 L   |
| C-C_R | -14.12972000 | 5.37582900  | 0.90485000 L   |
| C-C_R | -11.84109100 | 5.34663700  | 1.68406400 L   |
| C-C_R | -13.13128500 | 5.90006600  | 1.69531900 L   |
| C-C_R | -10.54334200 | 7.17064000  | 3.02272200 L   |
| N-N_R | -14.42243500 | 11.20524300 | 2.02377500 L   |
| C-C_R | -11.64644300 | 4.22706500  | 0.86738100 L   |

|       |              |             |               |
|-------|--------------|-------------|---------------|
| C-C_R | -8.55240400  | 6.56010300  | 4.00109500 L  |
| C-C_R | -13.92386100 | 4.26773200  | 0.09127500 L  |
| C-C_R | -8.66670800  | 5.28333200  | 3.44744500 L  |
| C-C_R | -15.93124000 | 4.67706000  | -1.24492100 L |
| C-C_R | -12.64104100 | 3.70405000  | 0.09009500 L  |
| C-C_R | -11.49790600 | 8.27127000  | 2.75290400 L  |
| C-C_R | -7.40459400  | 6.88895900  | 4.75913800 L  |
| C-C_R | -15.44107500 | 2.17485600  | -2.47326100 L |
| C-C_R | -14.98392200 | 2.42657400  | -1.19648800 L |
| C-C_R | -12.68948800 | 9.69182800  | 1.22300000 L  |
| C-C_R | -11.77206000 | 8.68681800  | 1.46100900 L  |
| C-C_R | -13.37754200 | 10.26718500 | 2.28166900 L  |
| C-C_R | -7.62748300  | 4.34506500  | 3.66316200 L  |
| C-C_R | -14.38467900 | 12.47749200 | 2.65049300 L  |
| C-C_R | -15.53823500 | 5.66231800  | -2.10510800 L |
| C-C_R | -13.06298000 | 9.90232100  | 3.56340200 L  |
| C-C_R | -12.11453300 | 8.91507500  | 3.80090100 L  |
| C-C_R | -17.27456200 | 4.49176500  | -0.98718300 L |
| C-C_R | -6.51877200  | 4.68532000  | 4.38920200 L  |
| C-C_R | -6.40957700  | 5.95706100  | 4.94123900 L  |
| C-C_R | -7.76988500  | 3.03643000  | 3.09265300 L  |
| N-N_R | -7.85725100  | 1.99265900  | 2.63473400 L  |
| C-C_R | -14.60949200 | 1.35692300  | -0.40203500 L |
| C-C_R | -15.42053000 | 10.85698300 | 1.09750100 L  |
| C-C_R | -18.19933000 | 5.29726600  | -1.61343500 L |
| C-C_R | -7.28825700  | 8.20094400  | 5.34534300 L  |
| C-C_R | -16.47245800 | 6.47096300  | -2.72237500 L |
| N-N_R | -7.16152600  | 9.22508400  | 5.82351100 L  |
| C-C_R | -15.16575500 | -0.16546000 | -2.16629200 L |
| C-C_R | -13.19466800 | 13.16479000 | 2.74692700 L  |
| C-C_R | -17.81095900 | 6.28273600  | -2.46766500 L |
| C-C_R | -15.54914500 | 0.89064700  | -2.94406200 L |
| C-C_R | -15.53109800 | 13.05385800 | 3.17790000 L  |
| C-C_R | -13.15199600 | 14.41454900 | 3.34016300 L  |
| C-C_R | -14.68531300 | 0.07535500  | -0.91751300 L |
| C-C_R | -17.00150700 | 11.44524300 | -0.60923300 L |
| C-C_R | -16.04080900 | 11.83142000 | 0.31227600 L  |
| C-C_R | -15.79365200 | 9.54068500  | 0.91975000 L  |
| C-C_R | -15.47140300 | 14.32004600 | 3.75525200 L  |
| C-C_R | -14.28472200 | 14.99166800 | 3.83051700 L  |
| C-C_R | -16.74122800 | 9.20577800  | -0.03149300 L |
| C-C_R | -17.35526700 | 10.16469600 | -0.79737400 L |
| N-N_R | -9.23160200  | -1.08275500 | 10.94768300 L |
| N-N_R | -8.99274500  | 1.50241200  | 12.01129100 L |



|       |              |             |               |
|-------|--------------|-------------|---------------|
| N-N_R | -14.44040800 | -2.23568600 | 7.53062000 L  |
| C-C_R | -10.17460000 | -0.17380300 | 10.71638400 L |
| C-C_R | -13.60699400 | -0.62107300 | 9.13063900 L  |
| C-C_R | -11.31831800 | -0.65094500 | 9.91058600 L  |
| C-C_R | -12.60851100 | -0.09751600 | 9.92184000 L  |
| C-C_R | -10.02061600 | 1.17373800  | 11.24851200 L |
| N-N_R | -13.89966100 | 5.20766200  | 10.25029700 L |
| C-C_R | -11.12362700 | -1.76978200 | 9.09458100 L  |
| C-C_R | -8.02958900  | 0.56325600  | 12.22829500 L |
| C-C_R | -13.40113400 | -1.72917000 | 8.31706400 L  |
| C-C_R | -8.14389300  | -0.71351600 | 11.67464500 L |
| C-C_R | -15.40846700 | -1.32052100 | 6.98160000 L  |
| C-C_R | -12.11826800 | -2.29353100 | 8.31661700 L  |
| C-C_R | -10.97518000 | 2.27436800  | 10.97869400 L |
| C-C_R | -6.88182000  | 0.89137800  | 12.98565900 L |
| C-C_R | -14.91830200 | -3.82272500 | 5.75326100 L  |
| C-C_R | -14.46110700 | -3.57027400 | 7.03071200 L  |
| C-C_R | -12.16676100 | 3.69492600  | 9.44878900 L  |
| C-C_R | -11.24929100 | 2.69065000  | 9.68747700 L  |
| C-C_R | -12.85476900 | 4.26960400  | 10.50819000 L |
| C-C_R | -7.10471000  | -1.65251700 | 11.88968400 L |
| C-C_R | -13.86190500 | 6.47991000  | 10.87701500 L |
| C-C_R | -15.01550800 | -0.33458400 | 6.12068200 L  |
| C-C_R | -12.54016500 | 3.90547300  | 11.79060200 L |
| C-C_R | -11.59176000 | 2.91749400  | 12.02742300 L |
| C-C_R | -16.75178900 | -1.50581600 | 7.23933900 L  |
| C-C_R | -5.99600300  | -1.31084900 | 12.61566900 L |
| C-C_R | -5.88676100  | -0.03978700 | 13.16843900 L |
| C-C_R | -7.24711200  | -2.96115100 | 11.31917500 L |
| N-N_R | -7.33443500  | -4.00418900 | 10.86193400 L |
| C-C_R | -14.08667600 | -4.63992400 | 7.82516500 L  |
| C-C_R | -14.89771500 | 4.86013500  | 9.32470100 L  |
| C-C_R | -17.67656100 | -0.69890200 | 6.61303300 L  |
| C-C_R | -6.76553100  | 2.20404200  | 13.57113300 L |
| C-C_R | -15.94968500 | 0.47338200  | 5.50414700 L  |
| N-N_R | -6.63875300  | 3.22750300  | 14.05003300 L |
| C-C_R | -14.64298200 | -6.16304100 | 6.06023000 L  |
| C-C_R | -12.67189400 | 7.16720900  | 10.97344900 L |
| C-C_R | -17.28818600 | 0.28515500  | 5.75885700 L  |
| C-C_R | -15.02641800 | -5.10625500 | 5.28172700 L  |
| C-C_R | -15.00832900 | 7.05769000  | 11.40436800 L |
| C-C_R | -12.62922300 | 8.41696800  | 11.56668500 L |
| C-C_R | -14.16253900 | -5.92222700 | 7.30900900 L  |
| C-C_R | -16.47873300 | 5.44766200  | 7.61728900 L  |

|       |              |             |                |
|-------|--------------|-------------|----------------|
| C-C_R | -15.51803600 | 5.83383900  | 8.53879700 L   |
| C-C_R | -15.27087900 | 3.54310300  | 9.14627200 L   |
| C-C_R | -14.94863000 | 8.32246500  | 11.98177400 L  |
| C-C_R | -13.76194900 | 8.99408600  | 12.05703900 L  |
| C-C_R | -16.21845500 | 3.20819700  | 8.19502900 L   |
| C-C_R | -16.83249400 | 4.16711500  | 7.42914800 L   |
| N-N_R | 14.23146300  | -5.40058100 | -8.38112700 L  |
| N-N_R | 14.47032100  | -2.81541400 | -7.31751900 L  |
| N-N_R | 9.02261500   | -6.55424600 | -11.79886800 L |
| C-C_R | 13.28846600  | -4.49162900 | -8.61242600 L  |
| C-C_R | 9.85611800   | -4.93957800 | -10.19743800 L |
| C-C_R | 12.14474700  | -4.96877100 | -9.41822400 L  |
| C-C_R | 10.85455400  | -4.41534200 | -9.40697000 L  |
| C-C_R | 13.44249600  | -3.14476800 | -8.07956600 L  |
| N-N_R | 9.56340400   | 0.88983600  | -9.07851300 L  |
| C-C_R | 12.33939600  | -6.08834200 | -10.23490700 L |
| C-C_R | 15.43343400  | -3.75530400 | -7.10119300 L  |
| C-C_R | 10.06197800  | -6.04767500 | -11.01101300 L |
| C-C_R | 15.31913000  | -5.03207500 | -7.65484300 L  |
| C-C_R | 8.05459900   | -5.63834700 | -12.34721000 L |
| C-C_R | 11.34479700  | -6.61135700 | -11.01219300 L |
| C-C_R | 12.48793200  | -2.04413700 | -8.34938400 L  |
| C-C_R | 16.58124500  | -3.42644800 | -6.34315000 L  |
| C-C_R | 8.54476300   | -8.14055100 | -13.57554900 L |
| C-C_R | 9.00191600   | -7.88883400 | -12.29877600 L |
| C-C_R | 11.29635100  | -0.62357900 | -9.87928800 L  |
| C-C_R | 12.21377900  | -1.62858900 | -9.64127900 L  |
| C-C_R | 10.60829600  | -0.04822200 | -8.82061900 L  |
| C-C_R | 16.35835600  | -5.97034300 | -7.43912600 L  |
| C-C_R | 9.60116000   | 2.16208400  | -8.45179500 L  |
| C-C_R | 8.44760400   | -4.65309000 | -13.20739600 L |
| C-C_R | 10.92285800  | -0.41308700 | -7.53888600 L  |
| C-C_R | 11.87130500  | -1.40033200 | -7.30138700 L  |
| C-C_R | 6.71127700   | -5.82364200 | -12.08947100 L |
| C-C_R | 17.46706600  | -5.63008800 | -6.71308700 L  |
| C-C_R | 17.57626200  | -4.35834700 | -6.16104900 L  |
| C-C_R | 16.21595400  | -7.27897700 | -8.00963500 L  |
| N-N_R | 16.12858800  | -8.32274800 | -8.46755400 L  |
| C-C_R | 9.37634700   | -8.95848400 | -11.50432300 L |
| C-C_R | 8.56530900   | 0.54157600  | -10.00478700 L |
| C-C_R | 5.78650800   | -5.01814100 | -12.71572300 L |
| C-C_R | 16.69758100  | -2.11446400 | -5.75694500 L  |
| C-C_R | 7.51338100   | -3.84444400 | -13.82466300 L |
| N-N_R | 16.82431300  | -1.09032300 | -5.27877700 L  |

|       |             |              |                |
|-------|-------------|--------------|----------------|
| C-C_R | 8.82008300  | -10.48086700 | -13.26858000 L |
| C-C_R | 10.79117100 | 2.84938300   | -8.35536100 L  |
| C-C_R | 6.17487900  | -4.03267100  | -13.56995300 L |
| C-C_R | 8.43669400  | -9.42476000  | -14.04635000 L |
| C-C_R | 8.45474100  | 2.73845100   | -7.92438800 L  |
| C-C_R | 10.83384200 | 4.09914200   | -7.76212500 L  |
| C-C_R | 9.30052600  | -10.24005300 | -12.01980100 L |
| C-C_R | 6.98433200  | 1.12983600   | -11.71152100 L |
| C-C_R | 7.94503000  | 1.51601300   | -10.79001200 L |
| C-C_R | 8.19218600  | -0.77472300  | -10.18253800 L |
| C-C_R | 8.51443600  | 4.00463900   | -7.34703600 L  |
| C-C_R | 9.70111700  | 4.67626000   | -7.27177100 L  |
| C-C_R | 7.24461000  | -1.10962900  | -11.13378100 L |
| C-C_R | 6.63057200  | -0.15071100  | -11.89966200 L |
| N-N_R | 14.75423600 | -11.39816200 | -0.15460500 L  |
| N-N_R | 14.99309400 | -8.81299600  | 0.90900300 L   |
| N-N_R | 9.54543000  | -12.55109300 | -3.57166800 L  |
| C-C_R | 13.81123900 | -10.48921000 | -0.38590400 L  |
| C-C_R | 10.37884500 | -10.93648000 | -1.97164900 L  |
| C-C_R | 12.66752100 | -10.96635200 | -1.19170300 L  |
| C-C_R | 11.37732700 | -10.41292300 | -1.18044800 L  |
| C-C_R | 13.96522300 | -9.14166900  | 0.14622400 L   |
| N-N_R | 10.08617700 | -5.10774600  | -0.85199100 L  |
| C-C_R | 12.86221200 | -12.08519000 | -2.00770700 L  |
| C-C_R | 15.95625000 | -9.75215200  | 1.12600700 L   |
| C-C_R | 10.58470500 | -12.04457700 | -2.78522400 L  |
| C-C_R | 15.84194600 | -11.02892300 | 0.57235700 L   |
| C-C_R | 8.57737200  | -11.63592800 | -4.12068800 L  |
| C-C_R | 11.86757100 | -12.60893800 | -2.78567100 L  |
| C-C_R | 13.01065900 | -8.04103900  | -0.12359400 L  |
| C-C_R | 17.10401800 | -9.42402900  | 1.88337100 L   |
| C-C_R | 9.06753700  | -14.13813300 | -5.34902700 L  |
| C-C_R | 9.52473200  | -13.88568100 | -4.07157600 L  |
| C-C_R | 11.81907700 | -6.62048100  | -1.65349900 L  |
| C-C_R | 12.73654800 | -7.62475800  | -1.41481100 L  |
| C-C_R | 11.13107000 | -6.04580400  | -0.59409800 L  |
| C-C_R | 16.88112900 | -11.96792400 | 0.78739600 L   |
| C-C_R | 10.12393300 | -3.83549700  | -0.22527400 L  |
| C-C_R | 8.97033000  | -10.64999100 | -4.98160600 L  |
| C-C_R | 11.44567400 | -6.40993400  | 0.68831400 L   |
| C-C_R | 12.39407900 | -7.39791300  | 0.92513500 L   |
| C-C_R | 7.23405000  | -11.82122400 | -3.86295000 L  |
| C-C_R | 17.98983500 | -11.62625600 | 1.51338100 L   |
| C-C_R | 18.09907700 | -10.35519400 | 2.06615100 L   |

|       |              |              |                |
|-------|--------------|--------------|----------------|
| C-C_R | 16.73872700  | -13.27655800 | 0.21688700 L   |
| N-N_R | 16.65140400  | -14.31959600 | -0.24035400 L  |
| C-C_R | 9.89916300   | -14.95533200 | -3.27712300 L  |
| C-C_R | 9.08812400   | -5.45527200  | -1.77758700 L  |
| C-C_R | 6.30927700   | -11.01431000 | -4.48925500 L  |
| C-C_R | 17.22030800  | -8.11136600  | 2.46884500 L   |
| C-C_R | 8.03615400   | -9.84202600  | -5.59814200 L  |
| N-N_R | 17.34708600  | -7.08790400  | 2.94774500 L   |
| C-C_R | 9.34285600   | -16.47844800 | -5.04205900 L  |
| C-C_R | 11.31394400  | -3.14819800  | -0.12883900 L  |
| C-C_R | 6.69765300   | -10.03025200 | -5.34343100 L  |
| C-C_R | 8.95942000   | -15.42166200 | -5.82056100 L  |
| C-C_R | 8.97751000   | -3.25771700  | 0.30208000 L   |
| C-C_R | 11.35661500  | -1.89844000  | 0.46439600 L   |
| C-C_R | 9.82329900   | -16.23763400 | -3.79328000 L  |
| C-C_R | 7.50710500   | -4.86774500  | -3.48499900 L  |
| C-C_R | 8.46780300   | -4.48156800  | -2.56349100 L  |
| C-C_R | 8.71495900   | -6.77230400  | -1.95601600 L  |
| C-C_R | 9.03720900   | -1.99294300  | 0.87948600 L   |
| C-C_R | 10.22389000  | -1.32132100  | 0.95475100 L   |
| C-C_R | 7.76738400   | -7.10721100  | -2.90726000 L  |
| C-C_R | 7.15334500   | -6.14829200  | -3.67314000 L  |
| N-N_R | -10.35064700 | -5.41576600  | -6.83007100 L  |
| N-N_R | -10.11179000 | -2.83060000  | -5.76646300 L  |
| N-N_R | -15.55949600 | -6.56943100  | -10.24781200 L |
| C-C_R | -11.29364500 | -4.50681400  | -7.06137000 L  |
| C-C_R | -14.72599200 | -4.95476400  | -8.64638300 L  |
| C-C_R | -12.43736300 | -4.98395600  | -7.86716800 L  |
| C-C_R | -13.72755600 | -4.43052700  | -7.85591400 L  |
| C-C_R | -11.13961400 | -3.15995300  | -6.52851000 L  |
| N-N_R | -15.01870700 | 0.87465000   | -7.52745700 L  |
| C-C_R | -12.24271400 | -6.10352700  | -8.68385100 L  |
| C-C_R | -9.14867600  | -3.77048900  | -5.55013800 L  |
| C-C_R | -14.52013300 | -6.06286100  | -9.45995700 L  |
| C-C_R | -9.26298000  | -5.04726100  | -6.10378700 L  |
| C-C_R | -16.52751200 | -5.65353300  | -10.79615400 L |
| C-C_R | -13.23731300 | -6.62654200  | -9.46113700 L  |
| C-C_R | -12.09417800 | -2.05932300  | -6.79832800 L  |
| C-C_R | -8.00086500  | -3.44163300  | -4.79209400 L  |
| C-C_R | -16.03734700 | -8.15573700  | -12.02449300 L |
| C-C_R | -15.58019400 | -7.90401900  | -10.74772000 L |
| C-C_R | -13.28576000 | -0.63876500  | -8.32823200 L  |
| C-C_R | -12.36833200 | -1.64377500  | -8.09022300 L  |
| C-C_R | -13.97381400 | -0.06340800  | -7.26956400 L  |

|       |              |              |                |
|-------|--------------|--------------|----------------|
| C-C_R | -8.22375500  | -5.98552800  | -5.88807000 L  |
| C-C_R | -14.98095000 | 2.14689900   | -6.90073900 L  |
| C-C_R | -16.13450700 | -4.66827500  | -11.65634000 L |
| C-C_R | -13.65925200 | -0.42827200  | -5.98783000 L  |
| C-C_R | -12.71080500 | -1.41551800  | -5.75033100 L  |
| C-C_R | -17.87083400 | -5.83882800  | -10.53841500 L |
| C-C_R | -7.11504400  | -5.64527300  | -5.16203100 L  |
| C-C_R | -7.00584900  | -4.37353200  | -4.60999400 L  |
| C-C_R | -8.36615700  | -7.29416300  | -6.45857900 L  |
| N-N_R | -8.45352300  | -8.33793400  | -6.91649800 L  |
| C-C_R | -15.20576400 | -8.97366900  | -9.95326700 L  |
| C-C_R | -16.01680200 | 0.52639000   | -8.45373100 L  |
| C-C_R | -18.79560200 | -5.03332700  | -11.16466700 L |
| C-C_R | -7.88452900  | -2.12964900  | -4.20588900 L  |
| C-C_R | -17.06873000 | -3.85963000  | -12.27360700 L |
| N-N_R | -7.75779800  | -1.10550800  | -3.72772100 L  |
| C-C_R | -15.76202700 | -10.49605200 | -11.71752400 L |
| C-C_R | -13.79094000 | 2.83419800   | -6.80430500 L  |
| C-C_R | -18.40723100 | -4.04785600  | -12.01889700 L |
| C-C_R | -16.14541700 | -9.43994600  | -12.49529400 L |
| C-C_R | -16.12737000 | 2.72326600   | -6.37333200 L  |
| C-C_R | -13.74826800 | 4.08395600   | -6.21106900 L  |
| C-C_R | -15.28158400 | -10.25523800 | -10.46874500 L |
| C-C_R | -17.59777900 | 1.11465100   | -10.16046500 L |
| C-C_R | -16.63708100 | 1.50082800   | -9.23895700 L  |
| C-C_R | -16.38992400 | -0.78990800  | -8.63148200 L  |
| C-C_R | -16.06767500 | 3.98945300   | -5.79598000 L  |
| C-C_R | -14.88099400 | 4.66107500   | -5.72071500 L  |
| C-C_R | -17.33750000 | -1.12481500  | -9.58272500 L  |
| C-C_R | -17.95153900 | -0.16589700  | -10.34860600 L |
| N-N_R | -9.82787400  | -11.41334800 | 1.39645100 L   |
| N-N_R | -9.58901600  | -8.82818100  | 2.46005900 L   |
| N-N_R | -15.03668000 | -12.56627900 | -2.02061300 L  |
| C-C_R | -10.77087100 | -10.50439600 | 1.16515200 L   |
| C-C_R | -14.20326600 | -10.95166600 | -0.42059300 L  |
| C-C_R | -11.91459000 | -10.98153700 | 0.35935300 L   |
| C-C_R | -13.20478300 | -10.42810900 | 0.37060800 L   |
| C-C_R | -10.61688800 | -9.15685500  | 1.69728000 L   |
| N-N_R | -14.49593300 | -5.12293100  | 0.69906500 L   |
| C-C_R | -11.71989900 | -12.10037500 | -0.45665100 L  |
| C-C_R | -8.62586100  | -9.76733700  | 2.67706200 L   |
| C-C_R | -13.99740600 | -12.05976300 | -1.23416800 L  |
| C-C_R | -8.74016500  | -11.04410800 | 2.12341300 L   |
| C-C_R | -16.00473900 | -11.65111400 | -2.56963200 L  |

|       |              |              |                |
|-------|--------------|--------------|----------------|
| C-C_R | -12.71454000 | -12.62412400 | -1.23461500 L  |
| C-C_R | -11.57145200 | -8.05622500  | 1.42746200 L   |
| C-C_R | -7.47809200  | -9.43921500  | 3.43442700 L   |
| C-C_R | -15.51457400 | -14.15331800 | -3.79797200 L  |
| C-C_R | -15.05737900 | -13.90086700 | -2.52052000 L  |
| C-C_R | -12.76303300 | -6.63566600  | -0.10244300 L  |
| C-C_R | -11.84556300 | -7.63994300  | 0.13624500 L   |
| C-C_R | -13.45104100 | -6.06098900  | 0.95695800 L   |
| C-C_R | -7.70098200  | -11.98311000 | 2.33845200 L   |
| C-C_R | -14.45817700 | -3.85068200  | 1.32578200 L   |
| C-C_R | -15.61178000 | -10.66517700 | -3.43055100 L  |
| C-C_R | -13.13643600 | -6.42512000  | 2.23936900 L   |
| C-C_R | -12.18803200 | -7.41309900  | 2.47619100 L   |
| C-C_R | -17.34806100 | -11.83640900 | -2.31189400 L  |
| C-C_R | -6.59227500  | -11.64144100 | 3.06443700 L   |
| C-C_R | -6.48303300  | -10.37038000 | 3.61720600 L   |
| C-C_R | -7.84338300  | -13.29174400 | 1.76794200 L   |
| N-N_R | -7.93070700  | -14.33478200 | 1.31070200 L   |
| C-C_R | -14.68294800 | -14.97051700 | -1.72606700 L  |
| C-C_R | -15.49398600 | -5.47045800  | -0.22653100 L  |
| C-C_R | -18.27283300 | -11.02949500 | -2.93819900 L  |
| C-C_R | -7.36180200  | -8.12655100  | 4.01990100 L   |
| C-C_R | -16.54595700 | -9.85721100  | -4.04708600 L  |
| N-N_R | -7.23502500  | -7.10309000  | 4.49880100 L   |
| C-C_R | -15.23925400 | -16.49363400 | -3.49100300 L  |
| C-C_R | -13.26816600 | -3.16338400  | 1.42221700 L   |
| C-C_R | -17.88445800 | -10.04543800 | -3.79237500 L  |
| C-C_R | -15.62269000 | -15.43684800 | -4.26950500 L  |
| C-C_R | -15.60460100 | -3.27290300  | 1.85313600 L   |
| C-C_R | -13.22549500 | -1.91362500  | 2.01545200 L   |
| C-C_R | -14.75881100 | -16.25282000 | -2.24222400 L  |
| C-C_R | -17.07500500 | -4.88293100  | -1.93394400 L  |
| C-C_R | -16.11430800 | -4.49675400  | -1.01243500 L  |
| C-C_R | -15.86715100 | -6.78748900  | -0.40496000 L  |
| C-C_R | -15.54490200 | -2.00812800  | 2.43054200 L   |
| C-C_R | -14.35822100 | -1.33650600  | 2.50580700 L   |
| C-C_R | -16.81472700 | -7.12239600  | -1.35620400 L  |
| C-C_R | -17.42876600 | -6.16347800  | -2.12208400 L  |
| N-N_R | 1.82963500   | 6.66735400   | -9.25091500 L  |
| N-N_R | 1.93604400   | 4.08308000   | -10.33704300 L |
| N-N_R | -2.91077600  | 7.81555200   | -5.20614100 L  |
| C-C_R | 0.92430800   | 5.75726000   | -8.90299200 L  |
| C-C_R | -2.28313900  | 6.20110800   | -6.89902900 L  |
| C-C_R | -0.10964200  | 6.23305700   | -7.95979000 L  |

|       |             |             |                |
|-------|-------------|-------------|----------------|
| C-C_R | -1.39033600 | 5.67804000  | -7.80882900 L  |
| C-C_R | 1.01179800  | 4.41054800  | -9.45109100 L  |
| N-N_R | -2.70704600 | 0.37193100  | -7.97347300 L  |
| C-C_R | 0.18373900  | 7.35292900  | -7.17390000 L  |
| C-C_R | 2.86312900  | 5.02340400  | -10.67331500 L |
| C-C_R | -1.97801400 | 7.30952100  | -6.11769600 L  |
| C-C_R | 2.81783900  | 6.30013100  | -10.10818000 L |
| C-C_R | -3.80006600 | 6.89850600  | -4.54060900 L  |
| C-C_R | -0.70491700 | 7.87478100  | -6.27778700 L  |
| C-C_R | 0.10007300  | 3.30876500  | -9.06351600 L  |
| C-C_R | 3.90605000  | 4.69595500  | -11.56817100 L |
| C-C_R | -3.16347200 | 9.40140600  | -3.38336500 L  |
| C-C_R | -2.87007000 | 9.14947300  | -4.70676100 L  |
| C-C_R | -0.88801000 | 1.88686000  | -7.39608200 L  |
| C-C_R | -0.01000900 | 2.89298000  | -7.74737700 L  |
| C-C_R | -1.70396400 | 1.31057400  | -8.35985200 L  |
| C-C_R | 3.81950800  | 7.24033800  | -10.45340600 L |
| C-C_R | -2.74679800 | -0.90031900 | -8.60006500 L  |
| C-C_R | -3.30179700 | 5.91312000  | -3.73592400 L  |
| C-C_R | -1.55354100 | 1.67567200  | -9.67234000 L  |
| C-C_R | -0.64264300 | 2.66480000  | -10.02647800 L |
| C-C_R | -5.16635500 | 7.08212800  | -4.62737900 L  |
| C-C_R | 4.82859000  | 6.89997900  | -11.31301800 L |
| C-C_R | 4.87009500  | 5.62833100  | -11.87456300 L |
| C-C_R | 3.74838200  | 8.54816100  | -9.86868900 L  |
| N-N_R | 3.71893300  | 9.59254000  | -9.40413400 L  |
| C-C_R | -2.59982600 | 10.21878800 | -5.54257100 L  |
| C-C_R | -3.58126900 | 0.71830100  | -6.92974200 L  |
| C-C_R | -6.00403500 | 6.27485800  | -3.88918700 L  |
| C-C_R | 3.95039400  | 3.38407000  | -12.16451500 L |
| C-C_R | -4.15002900 | 5.10337400  | -3.00619000 L  |
| N-N_R | 4.01723100  | 2.36072900  | -12.65563100 L |
| C-C_R | -2.93080200 | 11.74203600 | -3.72238600 L  |
| C-C_R | -1.57650300 | -1.58616000 | -8.84542700 L  |
| C-C_R | -5.51016000 | 5.28993300  | -3.09062400 L  |
| C-C_R | -3.21304200 | 10.68483900 | -2.90188200 L  |
| C-C_R | -3.94866200 | -1.47881600 | -8.97856800 L  |
| C-C_R | -1.60719800 | -2.83591100 | -9.43941800 L  |
| C-C_R | -2.61079000 | 11.50103700 | -5.02093600 L  |
| C-C_R | -4.93341700 | 0.12896200  | -5.03725600 L  |
| C-C_R | -4.09564400 | -0.25678400 | -6.07150700 L  |
| C-C_R | -3.92966900 | 2.03488700  | -6.70578400 L  |
| C-C_R | -3.96049800 | -2.74429500 | -9.55967400 L  |
| C-C_R | -2.79281500 | -3.41514100 | -9.78275800 L  |

|       |             |             |               |
|-------|-------------|-------------|---------------|
| C-C_R | -4.75057600 | 2.36870100  | -5.64295500 L |
| C-C_R | -5.26325000 | 1.40840700  | -4.80524700 L |
| N-N_R | 2.25967800  | 0.62463100  | -1.02620300 H |
| N-N_R | 2.33618300  | -1.90352700 | -2.15138100 H |
| N-N_R | -2.35079700 | 1.81813800  | 3.09469100 H  |
| C-C_R | 1.35530100  | -0.26997300 | -0.67809300 H |
| C-C_R | -1.80130300 | 0.17350100  | 1.40331500 H  |
| C-C_R | 0.34945700  | 0.20553600  | 0.27997300 H  |
| C-C_R | -0.92351400 | -0.34973600 | 0.47396500 H  |
| C-C_R | 1.42808700  | -1.60723700 | -1.25456000 H |
| N-N_R | -2.13417400 | -5.82802700 | 0.07321400 H  |
| C-C_R | 0.67282100  | 1.33990500  | 1.04214000 H  |
| C-C_R | 3.27052700  | -0.98892900 | -2.46951100 H |
| C-C_R | -1.46176200 | 1.29994800  | 2.16720700 H  |
| C-C_R | 3.23151700  | 0.29040600  | -1.88599200 H |
| C-C_R | -3.24497400 | 0.95353500  | 3.79075700 H  |
| C-C_R | -0.19778600 | 1.87753400  | 1.96013800 H  |
| C-C_R | 0.53658800  | -2.72649500 | -0.89602300 H |
| C-C_R | 4.31926000  | -1.31853000 | -3.36293200 H |
| C-C_R | -2.48716700 | 3.47083500  | 4.86864100 H  |
| C-C_R | -2.29887500 | 3.16405200  | 3.52082800 H  |
| C-C_R | -0.49531700 | -4.16676200 | 0.74404200 H  |
| C-C_R | 0.34583500  | -3.11766700 | 0.43011900 H  |
| C-C_R | -1.18163600 | -4.85207200 | -0.26217900 H |
| C-C_R | 4.22051700  | 1.24271000  | -2.24482800 H |
| C-C_R | -2.11251800 | -7.08450500 | -0.56652800 H |
| C-C_R | -2.73699400 | 0.03165300  | 4.70131300 H  |
| C-C_R | -0.90744000 | -4.53303600 | -1.59398600 H |
| C-C_R | -0.05887600 | -3.48524300 | -1.90369700 H |
| C-C_R | -4.62131800 | 1.08720700  | 3.63337300 H  |
| C-C_R | 5.23812900  | 0.90090900  | -3.11367400 H |
| C-C_R | 5.29399100  | -0.38388700 | -3.66250100 H |
| C-C_R | 4.13314200  | 2.55371000  | -1.69922300 H |
| N-N_R | 4.06616200  | 3.62665600  | -1.27567200 H |
| C-C_R | -2.10600500 | 4.19861300  | 2.60340000 H  |
| C-C_R | -3.02387800 | -5.58408300 | 1.14285100 H  |
| C-C_R | -5.48283600 | 0.28594100  | 4.37246800 H  |
| C-C_R | 4.36618600  | -2.62793300 | -3.92972200 H |
| C-C_R | -3.60154300 | -0.75537200 | 5.44632200 H  |
| N-N_R | 4.42745700  | -3.68044400 | -4.40562100 H |
| C-C_R | -2.31398400 | 5.82103300  | 4.37438100 H  |
| C-C_R | -0.89707400 | -7.72324900 | -0.82034800 H |
| C-C_R | -4.97473300 | -0.63790000 | 5.27681200 H  |
| C-C_R | -2.49833700 | 4.79163400  | 5.28724200 H  |



|       |             |              |               |
|-------|-------------|--------------|---------------|
| C-C_R | -3.30442300 | -7.71914300  | -0.92669000 H |
| C-C_R | -0.87772800 | -8.97452400  | -1.41984100 H |
| C-C_R | -2.10840800 | 5.51625500   | 3.03432600 H  |
| C-C_R | -4.28154200 | -6.36760300  | 3.04773700 H  |
| C-C_R | -3.44074200 | -6.62311200  | 1.97620800 H  |
| C-C_R | -3.49586800 | -4.29154900  | 1.39179700 H  |
| C-C_R | -3.27679600 | -8.97985200  | -1.50375600 H |
| C-C_R | -2.06467100 | -9.61343500  | -1.75632800 H |
| C-C_R | -4.32477400 | -4.04367500  | 2.47653900 H  |
| C-C_R | -4.72125300 | -5.07778200  | 3.31531400 H  |
| N-N_R | 2.87517700  | -5.32639600  | 7.20207500 L  |
| N-N_R | 2.98163300  | -7.91134900  | 6.11667900 L  |
| N-N_R | -1.86522900 | -4.17961100  | 11.24690300 L |
| C-C_R | 1.96985100  | -6.23648900  | 7.54999700 L  |
| C-C_R | -1.23755000 | -5.79332100  | 9.55469300 L  |
| C-C_R | 0.93590000  | -5.76069300  | 8.49320000 L  |
| C-C_R | -0.34474700 | -6.31638900  | 8.64489300 L  |
| C-C_R | 2.05738700  | -7.58388100  | 7.00263000 L  |
| N-N_R | -1.66145700 | -11.62249800 | 8.48024900 L  |
| C-C_R | 1.22923900  | -4.64155400  | 9.27841100 L  |
| C-C_R | 3.90871800  | -6.97102500  | 5.78040600 L  |
| C-C_R | -0.93242600 | -4.68490900  | 10.33602600 L |
| C-C_R | 3.86338200  | -5.69361900  | 6.34480900 L  |
| C-C_R | -2.75447700 | -5.09592300  | 11.91311300 L |
| C-C_R | 0.34062500  | -4.11896900  | 10.17520300 L |
| C-C_R | 1.14566200  | -8.68566400  | 7.39020500 L  |
| C-C_R | 4.95159300  | -7.29779400  | 4.88481900 L  |
| C-C_R | -2.11788300 | -2.59302300  | 13.07035700 L |
| C-C_R | -1.82448200 | -2.84495600  | 11.74696100 L |
| C-C_R | 0.15757900  | -10.10756900 | 9.05764000 L  |
| C-C_R | 1.03553700  | -9.10218300  | 8.70566600 L  |
| C-C_R | -0.65842200 | -10.68317500 | 8.09313700 L  |
| C-C_R | 4.86509700  | -4.75409100  | 6.00031500 L  |
| C-C_R | -1.70120900 | -12.89474800 | 7.85365700 L  |
| C-C_R | -2.25620800 | -6.08130900  | 12.71779700 L |
| C-C_R | -0.50795200 | -10.31875700 | 6.78138100 L  |
| C-C_R | 0.40294600  | -9.32963000  | 6.42724400 L  |
| C-C_R | -4.12076600 | -4.91230100  | 11.82634300 L |
| C-C_R | 5.87417900  | -5.09445100  | 5.14070400 L  |
| C-C_R | 5.91563700  | -6.36541900  | 4.57842600 L  |
| C-C_R | 4.79392400  | -3.44558800  | 6.58430100 L  |
| N-N_R | 4.76452200  | -2.40188900  | 7.04958700 L  |
| C-C_R | -1.55423700 | -1.77564100  | 10.91115100 L |
| C-C_R | -2.53568000 | -11.27612800 | 9.52398000 L  |

|       |             |              |                |
|-------|-------------|--------------|----------------|
| C-C_R | -4.95848800 | -5.72030400  | 12.56385600 L  |
| C-C_R | 4.99598300  | -8.61035900  | 4.28920700 L   |
| C-C_R | -3.10448600 | -6.89037600  | 13.44680000 L  |
| N-N_R | 5.06282000  | -9.63370100  | 3.79809000 L   |
| C-C_R | -1.88521300 | -0.25239300  | 12.73133600 L  |
| C-C_R | -0.53091400 | -13.58058900 | 7.60829400 L   |
| C-C_R | -4.46461800 | -6.70381700  | 13.36236500 L  |
| C-C_R | -2.16745300 | -1.30959000  | 13.55184000 L  |
| C-C_R | -2.90311500 | -13.47397900 | 7.47447600 L   |
| C-C_R | -0.56160900 | -14.83034000 | 7.01430300 L   |
| C-C_R | -1.56520100 | -0.49339200  | 11.43278500 L  |
| C-C_R | -3.88782800 | -11.86546700 | 11.41646600 L  |
| C-C_R | -3.05010200 | -12.25053300 | 10.38148200 L  |
| C-C_R | -2.88408000 | -9.95954200  | 9.74793700 L   |
| C-C_R | -2.91490900 | -14.73872400 | 6.89404700 L   |
| C-C_R | -1.74727300 | -15.40889100 | 6.67023200 L   |
| C-C_R | -3.70498700 | -9.62572800  | 10.81076600 L  |
| C-C_R | -4.21770800 | -10.58534200 | 11.64774200 L  |
| N-N_R | 1.75613600  | -9.66082000  | -10.57562500 L |
| N-N_R | 1.86258800  | -12.24436000 | -11.66107500 L |
| N-N_R | -2.98427400 | -8.51262200  | -6.53085100 L  |
| C-C_R | 0.85085200  | -10.57018000 | -10.22702400 L |
| C-C_R | -2.35663700 | -10.12706600 | -8.22373900 L  |
| C-C_R | -0.18318700 | -10.09443800 | -9.28523200 L  |
| C-C_R | -1.46379200 | -10.64940100 | -9.13286100 L  |
| C-C_R | 0.93829900  | -11.91762600 | -10.77580200 L |
| N-N_R | -2.78054400 | -15.95624300 | -9.29818400 L  |
| C-C_R | 0.11019300  | -8.97456500  | -8.49934300 L  |
| C-C_R | 2.78967300  | -11.30403700 | -11.99734800 L |
| C-C_R | -2.05151300 | -9.01865400  | -7.44240600 L  |
| C-C_R | 2.74434100  | -10.02804400 | -11.43289100 L |
| C-C_R | -3.87356400 | -9.42966800  | -5.86532000 L  |
| C-C_R | -0.77841600 | -8.45339300  | -7.60249700 L  |
| C-C_R | 0.02661700  | -13.01867600 | -10.38754900 L |
| C-C_R | 3.83250500  | -11.63153900 | -12.89361300 L |
| C-C_R | -3.23692800 | -6.92603400  | -4.70739700 L  |
| C-C_R | -2.94356900 | -7.17870100  | -6.03147100 L  |
| C-C_R | -0.96150800 | -14.44131400 | -8.72079200 L  |
| C-C_R | -0.08350800 | -13.43519400 | -9.07208700 L  |
| C-C_R | -1.77742100 | -15.01686600 | -9.68388500 L  |
| C-C_R | 3.74601000  | -9.08783600  | -11.77811700 L |
| C-C_R | -2.82029600 | -17.22849300 | -9.92477500 L  |
| C-C_R | -3.37529600 | -10.41505400 | -5.06063500 L  |
| C-C_R | -1.62699700 | -14.65176900 | -10.99637300 L |

|       |             |              |                |
|-------|-------------|--------------|----------------|
| C-C_R | -0.71609900 | -13.66264100 | -11.35051000 L |
| C-C_R | -5.23985400 | -9.24604600  | -5.95209000 L  |
| C-C_R | 4.75513400  | -9.42746200  | -12.63705000 L |
| C-C_R | 4.79663900  | -10.69911000 | -13.19859600 L |
| C-C_R | 3.67488300  | -7.78001300  | -11.19339900 L |
| N-N_R | 3.64543500  | -6.73563400  | -10.72884500 L |
| C-C_R | -2.67328200 | -6.10865300  | -6.86660300 L  |
| C-C_R | -3.65472500 | -15.60914000 | -8.25377400 L  |
| C-C_R | -6.07753300 | -10.05331600 | -5.21389800 L  |
| C-C_R | 3.87689600  | -12.94410400 | -13.48922500 L |
| C-C_R | -4.22352700 | -11.22480100 | -4.33090000 L  |
| N-N_R | 3.94377500  | -13.96671200 | -13.97966400 L |
| C-C_R | -3.00430000 | -4.58613800  | -5.04709600 L  |
| C-C_R | -1.65000200 | -17.91433400 | -10.17013800 L |
| C-C_R | -5.58370600 | -11.03756200 | -4.41606700 L  |
| C-C_R | -3.28654000 | -5.64333500  | -4.22659200 L  |
| C-C_R | -4.02216000 | -17.80699000 | -10.30327800 L |
| C-C_R | -1.68069700 | -19.16408500 | -10.76412900 L |
| C-C_R | -2.68424600 | -4.82640400  | -6.34496800 L  |
| C-C_R | -5.00691500 | -16.19921200 | -6.36196700 L  |
| C-C_R | -4.16910100 | -16.58422400 | -7.39554000 L  |
| C-C_R | -4.00316800 | -14.29328700 | -8.03049500 L  |
| C-C_R | -4.03399700 | -19.07246900 | -10.88438500 L |
| C-C_R | -2.86636000 | -19.74263600 | -11.10820000 L |
| C-C_R | -4.82403300 | -13.95874000 | -6.96698800 L  |
| C-C_R | -5.33675300 | -14.91835400 | -6.13001200 L  |
| N-N_R | 2.27890500  | -15.65698800 | -2.34915700 L  |
| N-N_R | 2.38536100  | -18.24194200 | -3.43455400 L  |
| N-N_R | -2.46150100 | -14.51020300 | 1.69567100 L   |
| C-C_R | 1.37357900  | -16.56708200 | -2.00123500 L  |
| C-C_R | -1.83382200 | -16.12391400 | 0.00346000 L   |
| C-C_R | 0.33962800  | -16.09128600 | -1.05803200 L  |
| C-C_R | -0.94101900 | -16.64698200 | -0.90634000 L  |
| C-C_R | 1.46111500  | -17.91447400 | -2.54860200 L  |
| N-N_R | -2.25772900 | -21.95309100 | -1.07098400 L  |
| C-C_R | 0.63296700  | -14.97214700 | -0.27282100 L  |
| C-C_R | 3.31244600  | -17.30161800 | -3.77082600 L  |
| C-C_R | -1.52869700 | -15.01550100 | 0.78479400 L   |
| C-C_R | 3.26711000  | -16.02421200 | -3.20642300 L  |
| C-C_R | -3.35074900 | -15.42651600 | 2.36188000 L   |
| C-C_R | -0.25564700 | -14.44956100 | 0.62397100 L   |
| C-C_R | 0.54939100  | -19.01625700 | -2.16102700 L  |
| C-C_R | 4.35532100  | -17.62838700 | -4.66641400 L  |
| C-C_R | -2.71415500 | -12.92361500 | 3.51912500 L   |

|       |             |              |               |
|-------|-------------|--------------|---------------|
| C-C_R | -2.42075300 | -13.17554900 | 2.19572900 L  |
| C-C_R | -0.43869300 | -20.43816200 | -0.49359200 L |
| C-C_R | 0.43926600  | -19.43277600 | -0.84556600 L |
| C-C_R | -1.25469400 | -21.01376800 | -1.45809500 L |
| C-C_R | 4.26882600  | -15.08468300 | -3.55091700 L |
| C-C_R | -2.29748100 | -23.22534100 | -1.69757500 L |
| C-C_R | -2.85248000 | -16.41190200 | 3.16656500 L  |
| C-C_R | -1.10422400 | -20.64935000 | -2.76985100 L |
| C-C_R | -0.19332600 | -19.66022200 | -3.12398800 L |
| C-C_R | -4.71703800 | -15.24289400 | 2.27511000 L  |
| C-C_R | 5.27790700  | -15.42504300 | -4.41052800 L |
| C-C_R | 5.31936500  | -16.69601200 | -4.97280600 L |
| C-C_R | 4.19765200  | -13.77618100 | -2.96693200 L |
| N-N_R | 4.16825000  | -12.73248200 | -2.50164500 L |
| C-C_R | -2.15050900 | -12.10623400 | 1.35991800 L  |
| C-C_R | -3.13195200 | -21.60672100 | -0.02725300 L |
| C-C_R | -5.55476000 | -16.05089700 | 3.01262400 L  |
| C-C_R | 4.39971100  | -18.94095200 | -5.26202600 L |
| C-C_R | -3.70075800 | -17.22096900 | 3.89556800 L  |
| N-N_R | 4.46654900  | -19.96429300 | -5.75314200 L |
| C-C_R | -2.48148500 | -10.58298600 | 3.18010300 L  |
| C-C_R | -1.12718600 | -23.91118200 | -1.94293800 L |
| C-C_R | -5.06089000 | -17.03440900 | 3.81113300 L  |
| C-C_R | -2.76372400 | -11.64018300 | 4.00060800 L  |
| C-C_R | -3.49938700 | -23.80457200 | -2.07675700 L |
| C-C_R | -1.15788100 | -25.16093300 | -2.53692900 L |
| C-C_R | -2.16147300 | -10.82398500 | 1.88155300 L  |
| C-C_R | -4.48409900 | -22.19606000 | 1.86523300 L  |
| C-C_R | -3.64637400 | -22.58112600 | 0.83025000 L  |
| C-C_R | -3.48035200 | -20.29013500 | 0.19670500 L  |
| C-C_R | -3.51118100 | -25.06931600 | -2.65718500 L |
| C-C_R | -2.34354500 | -25.73948400 | -2.88100000 L |
| C-C_R | -4.30125900 | -19.95632100 | 1.25953400 L  |
| C-C_R | -4.81398000 | -20.91593500 | 2.09651000 L  |
| H-H_  | 14.85482400 | 10.91515000  | -3.13778200 L |
| H-H_  | 13.10126000 | 10.01271300  | -4.54538600 L |
| H-H_  | 10.44200600 | 12.98902400  | -3.07077000 L |
| H-H_  | 12.19766800 | 13.89880800  | -1.69336000 L |
| H-H_  | 15.47560100 | 13.75930600  | 0.88463000 L  |
| H-H_  | 12.62875900 | 6.72597000   | -2.44269100 L |
| H-H_  | 11.02731200 | 8.52742700   | -2.85808400 L |
| H-H_  | 14.25640300 | 10.94267100  | 0.08245000 L  |
| H-H_  | 13.30999900 | 6.37111600   | -6.60854400 L |
| H-H_  | 11.62118400 | 8.10069500   | -7.02772700 L |

|      |             |             |               |
|------|-------------|-------------|---------------|
| H-H_ | 17.35354100 | 13.02286500 | -1.91410200 L |
| H-H_ | 5.49343200  | 12.77923100 | -6.75308300 L |
| H-H_ | 5.30264400  | 10.53771600 | -7.73433100 L |
| H-H_ | 14.02558800 | 15.23209600 | -2.81904100 L |
| H-H_ | 19.00118300 | 11.60644200 | -0.79457800 L |
| H-H_ | 15.91641200 | 9.51183200  | 1.17551100 L  |
| H-H_ | 15.00212300 | 17.92028000 | 0.31338300 L  |
| H-H_ | 12.05662300 | 4.02381800  | -4.58121100 L |
| H-H_ | 18.30113600 | 9.84480400  | 0.71809700 L  |
| H-H_ | 15.69535500 | 16.03656500 | 1.70598600 L  |
| H-H_ | 16.22072600 | 4.22537900  | -5.35994900 L |
| H-H_ | 11.97839200 | 1.81945900  | -5.63621200 L |
| H-H_ | 14.11707300 | 17.49984900 | -1.90272800 L |
| H-H_ | 17.24151300 | 4.55218500  | -1.02527000 L |
| H-H_ | 15.53684900 | 3.88895800  | -2.64010500 L |
| H-H_ | 15.10819400 | 7.97754100  | -3.74034200 L |
| H-H_ | 16.12163900 | 1.98395300  | -6.36471000 L |
| H-H_ | 14.00423100 | 0.78606000  | -6.49086500 L |
| H-H_ | 16.76067000 | 8.57492200  | -2.04808200 L |
| H-H_ | 17.85403700 | 6.85291300  | -0.69612700 L |
| H-H_ | 15.37759700 | 4.91756800  | 5.08873900 L  |
| H-H_ | 13.62407600 | 4.01586500  | 3.68181400 L  |
| H-H_ | 10.96468600 | 6.99280200  | 5.15428700 L  |
| H-H_ | 12.72048800 | 7.90054700  | 6.53389400 L  |
| H-H_ | 15.99845900 | 7.76319200  | 9.11250800 L  |
| H-H_ | 13.15149000 | 0.72765500  | 5.78315300 L  |
| H-H_ | 11.55008500 | 2.52984600  | 5.36843700 L  |
| H-H_ | 14.77917600 | 4.94509000  | 8.30897200 L  |
| H-H_ | 13.83281500 | 0.37426900  | 1.61865600 L  |
| H-H_ | 12.14400000 | 2.10384700  | 1.19947300 L  |
| H-H_ | 17.87631500 | 7.02528400  | 6.31242000 L  |
| H-H_ | 6.01624700  | 6.78238300  | 1.47411700 L  |
| H-H_ | 5.82446200  | 4.54086700  | 0.49293200 L  |
| H-H_ | 14.54840400 | 9.23524800  | 5.40815900 L  |
| H-H_ | 19.52395700 | 5.60886100  | 7.43194300 L  |
| H-H_ | 16.43918500 | 3.51425100  | 9.40203300 L  |
| H-H_ | 15.52589400 | 11.92269900 | 8.53984100 L  |
| H-H_ | 12.57939700 | -1.97376300 | 3.64531100 L  |
| H-H_ | 18.82481400 | 3.84858200  | 8.94309200 L  |
| H-H_ | 16.21812800 | 10.03898300 | 9.93250800 L  |
| H-H_ | 16.74349900 | -1.77220200 | 2.86657300 L  |
| H-H_ | 12.50125400 | -4.17806900 | 2.59172000 L  |
| H-H_ | 14.63889100 | 11.50300000 | 6.32453500 L  |
| H-H_ | 17.76524100 | -1.44612900 | 7.20051000 L  |

|      |              |              |               |
|------|--------------|--------------|---------------|
| H-H_ | 16.05966500  | -2.10789000  | 5.58709500 L  |
| H-H_ | 15.63087800  | 1.97990600   | 4.48477000 L  |
| H-H_ | 16.64445900  | -4.01430800  | 1.86254300 L  |
| H-H_ | 14.52686900  | -5.21089600  | 1.73351400 L  |
| H-H_ | 17.28248700  | 2.57807400   | 6.17918100 L  |
| H-H_ | 18.37680600  | 0.85674500   | 7.53034000 L  |
| H-H_ | 15.90041300  | -1.07927900  | 13.31593900 L |
| H-H_ | 14.14684900  | -1.98171700  | 11.90833600 L |
| H-H_ | 11.48746400  | 0.99380700   | 13.38086300 L |
| H-H_ | 13.24321000  | 1.90505900   | 14.75963000 L |
| H-H_ | 16.52119000  | 1.76487700   | 17.33835100 L |
| H-H_ | 13.67534600  | -5.26845900  | 14.01096800 L |
| H-H_ | 12.07281600  | -3.46846900  | 13.59428100 L |
| H-H_ | 15.30199200  | -1.05175800  | 16.53617200 L |
| H-H_ | 14.35558800  | -5.62331300  | 9.84517800 L  |
| H-H_ | 12.66677300  | -3.89373400  | 9.42599400 L  |
| H-H_ | 18.40021700  | 1.02849100   | 14.54096800 L |
| H-H_ | 6.53902100   | 0.78480200   | 9.70063900 L  |
| H-H_ | 6.34814000   | -1.45535400  | 8.71792600 L  |
| H-H_ | 15.07117700  | 3.23766600   | 13.63468100 L |
| H-H_ | 20.04664500  | -0.39018800  | 15.65710900 L |
| H-H_ | 16.96195400  | -2.48191700  | 17.62850100 L |
| H-H_ | 16.04771200  | 5.92585000   | 16.76710400 L |
| H-H_ | 13.10221200  | -7.97061100  | 11.87251100 L |
| H-H_ | 19.34672000  | -2.14821200  | 17.17176500 L |
| H-H_ | 16.74094400  | 4.04213600   | 18.15970800 L |
| H-H_ | 17.26622600  | -7.76910400  | 11.09236200 L |
| H-H_ | 13.02407000  | -10.17491600 | 10.81892000 L |
| H-H_ | 15.16266200  | 5.50541900   | 14.55099400 L |
| H-H_ | 18.28710100  | -7.44224400  | 15.42845100 L |
| H-H_ | 16.58338900  | -8.10479100  | 13.81282200 L |
| H-H_ | 16.15378300  | -4.01688800  | 12.71338000 L |
| H-H_ | 17.16727500  | -10.01115600 | 10.08974300 L |
| H-H_ | 15.04968400  | -11.20774400 | 9.96071400 L  |
| H-H_ | 17.80625900  | -3.41950700  | 14.40564000 L |
| H-H_ | 18.89957900  | -5.14083700  | 15.75686200 L |
| H-H_ | -9.72728700  | 10.89996400  | -1.58672600 L |
| H-H_ | -11.48085000 | 9.99752700   | -2.99433000 L |
| H-H_ | -14.14010400 | 12.97383900  | -1.51971400 L |
| H-H_ | -12.38444200 | 13.88362300  | -0.14230400 L |
| H-H_ | -9.10651000  | 13.74412100  | 2.43568500 L  |
| H-H_ | -11.95335100 | 6.71078400   | -0.89163500 L |
| H-H_ | -13.55479900 | 8.51224200   | -1.30702900 L |
| H-H_ | -10.32570800 | 10.92748600  | 1.63350600 L  |

|      |              |             |               |
|------|--------------|-------------|---------------|
| H-H_ | -11.27211100 | 6.35593100  | -5.05748800 L |
| H-H_ | -12.96092600 | 8.08551000  | -5.47667100 L |
| H-H_ | -7.22856900  | 13.00768000 | -0.36304600 L |
| H-H_ | -19.08867900 | 12.76404600 | -5.20202700 L |
| H-H_ | -19.27946600 | 10.52253000 | -6.18327500 L |
| H-H_ | -10.55652200 | 15.21691000 | -1.26798500 L |
| H-H_ | -5.58092700  | 11.59125700 | 0.75647800 L  |
| H-H_ | -8.66569900  | 9.49664700  | 2.72656700 L  |
| H-H_ | -9.57998700  | 17.90509400 | 1.86443900 L  |
| H-H_ | -12.52548700 | 4.00863300  | -3.03015500 L |
| H-H_ | -6.28097500  | 9.82961800  | 2.26915300 L  |
| H-H_ | -8.88675500  | 16.02137900 | 3.25704200 L  |
| H-H_ | -8.36138500  | 4.21019400  | -3.80889300 L |
| H-H_ | -12.60371900 | 1.80427300  | -4.08515600 L |
| H-H_ | -10.46503700 | 17.48466300 | -0.35167200 L |
| H-H_ | -7.34059800  | 4.53700000  | 0.52578500 L  |
| H-H_ | -9.04526100  | 3.87377300  | -1.08904900 L |
| H-H_ | -9.47391700  | 7.96235600  | -2.18928600 L |
| H-H_ | -8.46047100  | 1.96876700  | -4.81365500 L |
| H-H_ | -10.57787900 | 0.77087400  | -4.93980900 L |
| H-H_ | -7.82144100  | 8.55973700  | -0.49702600 L |
| H-H_ | -6.72807400  | 6.83772800  | 0.85492800 L  |
| H-H_ | -9.20451300  | 4.90238300  | 6.63979500 L  |
| H-H_ | -10.95803400 | 4.00067900  | 5.23287000 L  |
| H-H_ | -13.61742400 | 6.97761600  | 6.70534300 L  |
| H-H_ | -11.86162300 | 7.88536200  | 8.08495000 L  |
| H-H_ | -8.58365200  | 7.74800600  | 10.66356400 L |
| H-H_ | -11.43062000 | 0.71246900  | 7.33420800 L  |
| H-H_ | -13.03202500 | 2.51466000  | 6.91949300 L  |
| H-H_ | -9.80293500  | 4.92990400  | 9.86002800 L  |
| H-H_ | -10.74929600 | 0.35908300  | 3.16971200 L  |
| H-H_ | -12.43811100 | 2.08866200  | 2.75052800 L  |
| H-H_ | -6.70579600  | 7.01009800  | 7.86347600 L  |
| H-H_ | -18.56586300 | 6.76719800  | 3.02517300 L  |
| H-H_ | -18.75764900 | 4.52568200  | 2.04398800 L  |
| H-H_ | -10.03370700 | 9.22006200  | 6.95921500 L  |
| H-H_ | -5.05815400  | 5.59367500  | 8.98299900 L  |
| H-H_ | -8.14292600  | 3.49906500  | 10.95308900 L |
| H-H_ | -9.05621600  | 11.90751300 | 10.09089700 L |
| H-H_ | -12.00271400 | -1.98894900 | 5.19636700 L  |
| H-H_ | -5.75729700  | 3.83339700  | 10.49414800 L |
| H-H_ | -8.36398200  | 10.02379800 | 11.48356400 L |
| H-H_ | -7.83861100  | -1.78738700 | 4.41762800 L  |
| H-H_ | -12.08085600 | -4.19325400 | 4.14277600 L  |

|      |              |              |                |
|------|--------------|--------------|----------------|
| H-H_ | -9.94321900  | 11.48781500  | 7.87559100 L   |
| H-H_ | -6.81686900  | -1.46131500  | 8.75156600 L   |
| H-H_ | -8.52244600  | -2.12307500  | 7.13815100 L   |
| H-H_ | -8.95123200  | 1.96472000   | 6.03582600 L   |
| H-H_ | -7.93765100  | -4.02949400  | 3.41359900 L   |
| H-H_ | -10.05524200 | -5.22608200  | 3.28457000 L   |
| H-H_ | -7.29962300  | 2.56288800   | 7.73023700 L   |
| H-H_ | -6.20530500  | 0.84155900   | 9.08139600 L   |
| H-H_ | -8.68169800  | -1.09446500  | 14.86699500 L  |
| H-H_ | -10.43526100 | -1.99690200  | 13.45939100 L  |
| H-H_ | -13.09464700 | 0.97862200   | 14.93191900 L  |
| H-H_ | -11.33890000 | 1.88987300   | 16.31068600 L  |
| H-H_ | -8.06092100  | 1.74969100   | 18.88940700 L  |
| H-H_ | -10.90676400 | -5.28364400  | 15.56202400 L  |
| H-H_ | -12.50929400 | -3.48365500  | 15.14533600 L  |
| H-H_ | -9.28011900  | -1.06694300  | 18.08722800 L  |
| H-H_ | -10.22652200 | -5.63849800  | 11.39623300 L  |
| H-H_ | -11.91533700 | -3.90891900  | 10.97705000 L  |
| H-H_ | -6.18189300  | 1.01330500   | 16.09202300 L  |
| H-H_ | -18.04309000 | 0.76961700   | 11.25169500 L  |
| H-H_ | -18.23397100 | -1.47054000  | 10.26898200 L  |
| H-H_ | -9.51093300  | 3.22248100   | 15.18573700 L  |
| H-H_ | -4.53546500  | -0.40537300  | 17.20816400 L  |
| H-H_ | -7.62015700  | -2.49710300  | 19.17955700 L  |
| H-H_ | -8.53439800  | 5.91066500   | 18.31816000 L  |
| H-H_ | -11.47989800 | -7.98579600  | 13.42356700 L  |
| H-H_ | -5.23539000  | -2.16339800  | 18.72282100 L  |
| H-H_ | -7.84116600  | 4.02695000   | 19.71076400 L  |
| H-H_ | -7.31588500  | -7.78428900  | 12.64341800 L  |
| H-H_ | -11.55804100 | -10.19010200 | 12.36997600 L  |
| H-H_ | -9.41944800  | 5.49023400   | 16.10205000 L  |
| H-H_ | -6.29500900  | -7.45742900  | 16.97950700 L  |
| H-H_ | -7.99872100  | -8.11997600  | 15.36387800 L  |
| H-H_ | -8.42832800  | -4.03207400  | 14.26443600 L  |
| H-H_ | -7.41483600  | -10.02634200 | 11.64079900 L  |
| H-H_ | -9.53242600  | -11.22292900 | 11.51177000 L  |
| H-H_ | -6.77585200  | -3.43469300  | 15.95669600 L  |
| H-H_ | -5.68253200  | -5.15602200  | 17.30791800 L  |
| H-H_ | 14.25855200  | 0.58455700   | -12.68901500 L |
| H-H_ | 12.50498900  | -0.31788000  | -14.09661800 L |
| H-H_ | 9.84573400   | 2.65843100   | -12.62200300 L |
| H-H_ | 11.60139600  | 3.56821600   | -11.24459200 L |
| H-H_ | 14.87932900  | 3.42871300   | -8.66660300 L  |
| H-H_ | 12.03248700  | -3.60462300  | -11.99392300 L |



|      |             |              |                |
|------|-------------|--------------|----------------|
| H-H_ | 10.43104000 | -1.80316600  | -12.40931700 L |
| H-H_ | 13.66013100 | 0.61207800   | -9.46878200 L  |
| H-H_ | 12.71372700 | -3.95947600  | -16.15977600 L |
| H-H_ | 11.02491200 | -2.22989800  | -16.57896000 L |
| H-H_ | 16.75727000 | 2.69227200   | -11.46533400 L |
| H-H_ | 4.89716000  | 2.44863800   | -16.30431500 L |
| H-H_ | 4.70637200  | 0.20712300   | -17.28556300 L |
| H-H_ | 13.42931600 | 4.90150300   | -12.37027300 L |
| H-H_ | 18.40491100 | 1.27584900   | -10.34581100 L |
| H-H_ | 15.32014000 | -0.81876100  | -8.37572100 L  |
| H-H_ | 14.40585100 | 7.58968700   | -9.23785000 L  |
| H-H_ | 11.46035100 | -6.30677500  | -14.13244300 L |
| H-H_ | 17.70486400 | -0.48578900  | -8.83313500 L  |
| H-H_ | 15.09908300 | 5.70597200   | -7.84524600 L  |
| H-H_ | 15.62445400 | -6.10521300  | -14.91118100 L |
| H-H_ | 11.38212000 | -8.51113400  | -15.18744400 L |
| H-H_ | 13.52080200 | 7.16925600   | -11.45396000 L |
| H-H_ | 16.64524100 | -5.77840700  | -10.57650300 L |
| H-H_ | 14.94057700 | -6.44163500  | -12.19133700 L |
| H-H_ | 14.51192200 | -2.35305200  | -13.29157400 L |
| H-H_ | 15.52536800 | -8.34664000  | -15.91594300 L |
| H-H_ | 13.40795900 | -9.54453300  | -16.04209700 L |
| H-H_ | 16.16439800 | -1.75567100  | -11.59931400 L |
| H-H_ | 17.25776500 | -3.47768000  | -10.24736000 L |
| H-H_ | 14.78132500 | -5.41302400  | -4.46249300 L  |
| H-H_ | 13.02780400 | -6.31472800  | -5.86941800 L  |
| H-H_ | 10.36841400 | -3.33779100  | -4.39694500 L  |
| H-H_ | 12.12421600 | -2.43004500  | -3.01733800 L  |
| H-H_ | 15.40218700 | -2.56740100  | -0.43872400 L  |
| H-H_ | 12.55521800 | -9.60293800  | -3.76808000 L  |
| H-H_ | 10.95381300 | -7.80074700  | -4.18279500 L  |
| H-H_ | 14.18290400 | -5.38550300  | -1.24226000 L  |
| H-H_ | 13.23654300 | -9.95632400  | -7.93257600 L  |
| H-H_ | 11.54772800 | -8.22674500  | -8.35176000 L  |
| H-H_ | 17.28004300 | -3.30530900  | -3.23881200 L  |
| H-H_ | 5.41997600  | -3.54820900  | -8.07711500 L  |
| H-H_ | 5.22819000  | -5.78972600  | -9.05830000 L  |
| H-H_ | 13.95213200 | -1.09534500  | -4.14307300 L  |
| H-H_ | 18.92768500 | -4.72173200  | -2.11928900 L  |
| H-H_ | 15.84291300 | -6.81634200  | -0.14919900 L  |
| H-H_ | 14.92962300 | 1.59210600   | -1.01139100 L  |
| H-H_ | 11.98312500 | -12.30435600 | -5.90592100 L  |
| H-H_ | 18.22854200 | -6.48201100  | -0.60814000 L  |
| H-H_ | 15.62185700 | -0.29160900  | 0.38127600 L   |

|      |              |              |                |
|------|--------------|--------------|----------------|
| H-H_ | 16.14722700  | -12.10279500 | -6.68466000 L  |
| H-H_ | 11.90498200  | -14.50866100 | -6.95951200 L  |
| H-H_ | 14.04261900  | 1.17240700   | -3.22669700 L  |
| H-H_ | 17.16897000  | -11.77672200 | -2.35072200 L  |
| H-H_ | 15.46339300  | -12.43848200 | -3.96413700 L  |
| H-H_ | 15.03460600  | -8.35068700  | -5.06646300 L  |
| H-H_ | 16.04818800  | -14.34490100 | -7.68868900 L  |
| H-H_ | 13.93059700  | -15.54148900 | -7.81771800 L  |
| H-H_ | 16.68621600  | -7.75251900  | -3.37205100 L  |
| H-H_ | 17.78053400  | -9.47384800  | -2.02089200 L  |
| H-H_ | 15.30414100  | -11.40987200 | 3.76470700 L   |
| H-H_ | 13.55057800  | -12.31230900 | 2.35710300 L   |
| H-H_ | 10.89119200  | -9.33678500  | 3.82963000 L   |
| H-H_ | 12.64693800  | -8.42553400  | 5.20839800 L   |
| H-H_ | 15.92491800  | -8.56571600  | 7.78711900 L   |
| H-H_ | 13.07907400  | -15.59905100 | 4.45973500 L   |
| H-H_ | 11.47654400  | -13.79906200 | 4.04304800 L   |
| H-H_ | 14.70572000  | -11.38235100 | 6.98493900 L   |
| H-H_ | 13.75931600  | -15.95390600 | 0.29394500 L   |
| H-H_ | 12.07050100  | -14.22432700 | -0.12523800 L  |
| H-H_ | 17.80394500  | -9.30210200  | 4.98973500 L   |
| H-H_ | 5.94274900   | -9.54579100  | 0.14940700 L   |
| H-H_ | 5.75186800   | -11.78594700 | -0.83330600 L  |
| H-H_ | 14.47490500  | -7.09292600  | 4.08344900 L   |
| H-H_ | 19.45037300  | -10.72078000 | 6.10587600 L   |
| H-H_ | 16.36568200  | -12.81251000 | 8.07726900 L   |
| H-H_ | 15.45144000  | -4.40474200  | 7.21587200 L   |
| H-H_ | 12.50594000  | -18.30120400 | 2.32127900 L   |
| H-H_ | 18.75044800  | -12.47880500 | 7.62053300 L   |
| H-H_ | 16.14467200  | -6.28845700  | 8.60847600 L   |
| H-H_ | 16.66995400  | -18.09969600 | 1.54113000 L   |
| H-H_ | 12.42779800  | -20.50550900 | 1.26768800 L   |
| H-H_ | 14.56639100  | -4.82517300  | 4.99976200 L   |
| H-H_ | 17.69083000  | -17.77283700 | 5.87721900 L   |
| H-H_ | 15.98711700  | -18.43538400 | 4.26159000 L   |
| H-H_ | 15.55751100  | -14.34748100 | 3.16214800 L   |
| H-H_ | 16.57100300  | -20.34174900 | 0.53851100 L   |
| H-H_ | 14.45341200  | -21.53833700 | 0.40948200 L   |
| H-H_ | 17.20998700  | -13.75010000 | 4.85440800 L   |
| H-H_ | 18.30330700  | -15.47142900 | 6.20563000 L   |
| H-H_ | -10.32355800 | 0.56937200   | -11.13795900 L |
| H-H_ | -12.07712200 | -0.33306600  | -12.54556200 L |
| H-H_ | -14.73637600 | 2.64324600   | -11.07094700 L |
| H-H_ | -12.98071400 | 3.55303000   | -9.69353600 L  |

|      |              |              |                |
|------|--------------|--------------|----------------|
| H-H_ | -9.70278200  | 3.41352800   | -7.11554700 L  |
| H-H_ | -12.54962300 | -3.61980800  | -10.44286700 L |
| H-H_ | -14.15107000 | -1.81835100  | -10.85826100 L |
| H-H_ | -10.92198000 | 0.59689300   | -7.91772600 L  |
| H-H_ | -11.86838300 | -3.97466200  | -14.60872100 L |
| H-H_ | -13.55719800 | -2.24508300  | -15.02790400 L |
| H-H_ | -7.82484100  | 2.67708700   | -9.91427800 L  |
| H-H_ | -19.68495000 | 2.43345300   | -14.75325900 L |
| H-H_ | -19.87573800 | 0.19193700   | -15.73450700 L |
| H-H_ | -11.15279400 | 4.88631700   | -10.81921700 L |
| H-H_ | -6.17719900  | 1.26066400   | -8.79475500 L  |
| H-H_ | -9.26197100  | -0.83394600  | -6.82466500 L  |
| H-H_ | -10.17625900 | 7.57450100   | -7.68679400 L  |
| H-H_ | -13.12175900 | -6.32196000  | -12.58138700 L |
| H-H_ | -6.87724700  | -0.50097500  | -7.28207900 L  |
| H-H_ | -9.48302700  | 5.69078700   | -6.29419000 L  |
| H-H_ | -8.95765700  | -6.12039900  | -13.36012500 L |
| H-H_ | -13.19999100 | -8.52631900  | -13.63638900 L |
| H-H_ | -11.06130900 | 7.15407000   | -9.90290400 L  |
| H-H_ | -7.93687000  | -5.79359300  | -9.02544700 L  |
| H-H_ | -9.64153300  | -6.45682000  | -10.64028100 L |
| H-H_ | -10.07018900 | -2.36823700  | -11.74051800 L |
| H-H_ | -9.05674300  | -8.36182600  | -14.36488700 L |
| H-H_ | -11.17415100 | -9.55971900  | -14.49104200 L |
| H-H_ | -8.41771200  | -1.77085600  | -10.04825800 L |
| H-H_ | -7.32434600  | -3.49286500  | -8.69630400 L  |
| H-H_ | -9.80078500  | -5.42821000  | -2.91143700 L  |
| H-H_ | -11.55430600 | -6.32991300  | -4.31836300 L  |
| H-H_ | -14.21369600 | -3.35297600  | -2.84588900 L  |
| H-H_ | -12.45789400 | -2.44523100  | -1.46628200 L  |
| H-H_ | -9.17992400  | -2.58258600  | 1.11233100 L   |
| H-H_ | -12.02689200 | -9.61812300  | -2.21702400 L  |
| H-H_ | -13.62829700 | -7.81593200  | -2.63173900 L  |
| H-H_ | -10.39920600 | -5.40068800  | 0.30879500 L   |
| H-H_ | -11.34556700 | -9.97151000  | -6.38152100 L  |
| H-H_ | -13.03438200 | -8.24193100  | -6.80070400 L  |
| H-H_ | -7.30206800  | -3.32049400  | -1.68775600 L  |
| H-H_ | -19.16213500 | -3.56339500  | -6.52605900 L  |
| H-H_ | -19.35392000 | -5.80491100  | -7.50724400 L  |
| H-H_ | -10.62997900 | -1.11053000  | -2.59201700 L  |
| H-H_ | -5.65442600  | -4.73691700  | -0.56823300 L  |
| H-H_ | -8.73919700  | -6.83152700  | 1.40185700 L   |
| H-H_ | -9.65248800  | 1.57692100   | 0.53966500 L   |
| H-H_ | -12.59898600 | -12.31954100 | -4.35486500 L  |

|      |              |              |               |
|------|--------------|--------------|---------------|
| H-H_ | -6.35356900  | -6.49719600  | 0.94291500 L  |
| H-H_ | -8.96025400  | -0.30679500  | 1.93233200 L  |
| H-H_ | -8.43488300  | -12.11798000 | -5.13360400 L |
| H-H_ | -12.67712800 | -14.52384700 | -5.40845700 L |
| H-H_ | -10.53949100 | 1.15722200   | -1.67564100 L |
| H-H_ | -7.41314100  | -11.79190700 | -0.79966600 L |
| H-H_ | -9.11871800  | -12.45366800 | -2.41308100 L |
| H-H_ | -9.54750400  | -8.36587300  | -3.51540700 L |
| H-H_ | -8.53392300  | -14.36008700 | -6.13763300 L |
| H-H_ | -10.65151400 | -15.55667400 | -6.26666200 L |
| H-H_ | -7.89589500  | -7.76770500  | -1.82099500 L |
| H-H_ | -6.80157700  | -9.48903300  | -0.46983600 L |
| H-H_ | -9.27797000  | -11.42505800 | 5.31576300 L  |
| H-H_ | -11.03153300 | -12.32749500 | 3.90815900 L  |
| H-H_ | -13.69091800 | -9.35197100  | 5.38068600 L  |
| H-H_ | -11.93517200 | -8.44071900  | 6.75945400 L  |
| H-H_ | -8.65719300  | -8.58090100  | 9.33817500 L  |
| H-H_ | -11.50303600 | -15.61423700 | 6.01079100 L  |
| H-H_ | -13.10556600 | -13.81424700 | 5.59410400 L  |
| H-H_ | -9.87639100  | -11.39753600 | 8.53599500 L  |
| H-H_ | -10.82279400 | -15.96909100 | 1.84500100 L  |
| H-H_ | -12.51160900 | -14.23951200 | 1.42581800 L  |
| H-H_ | -6.77816500  | -9.31728700  | 6.54079100 L  |
| H-H_ | -18.63936200 | -9.56097600  | 1.70046300 L  |
| H-H_ | -18.83024200 | -11.80113300 | 0.71775000 L  |
| H-H_ | -10.10720500 | -7.10811200  | 5.63450500 L  |
| H-H_ | -5.13173700  | -10.73596600 | 7.65693200 L  |
| H-H_ | -8.21642800  | -12.82769600 | 9.62832500 L  |
| H-H_ | -9.13067000  | -4.41992800  | 8.76692800 L  |
| H-H_ | -12.07617000 | -18.31638900 | 3.87233500 L  |
| H-H_ | -5.83166200  | -12.49399000 | 9.17158900 L  |
| H-H_ | -8.43743800  | -6.30364300  | 10.15953100 L |
| H-H_ | -7.91215700  | -18.11488200 | 3.09218600 L  |
| H-H_ | -12.15431300 | -20.52069400 | 2.81874300 L  |
| H-H_ | -10.01572000 | -4.84035900  | 6.55081700 L  |
| H-H_ | -6.89128100  | -17.78802200 | 7.42827500 L  |
| H-H_ | -8.59499300  | -18.45056900 | 5.81264600 L  |
| H-H_ | -9.02460000  | -14.36266600 | 4.71320400 L  |
| H-H_ | -8.01110700  | -20.35693400 | 2.08956700 L  |
| H-H_ | -10.12869800 | -21.55352200 | 1.96053800 L  |
| H-H_ | -7.37212400  | -13.76528500 | 6.40546400 L  |
| H-H_ | -6.27880300  | -15.48661500 | 7.75668600 L  |
| H-H_ | 2.47884600   | 17.01076300  | -3.65635100 L |
| H-H_ | 0.91296900   | 17.91041600  | -2.03998200 L |

|      |             |             |               |
|------|-------------|-------------|---------------|
| H-H_ | -1.90475300 | 14.93150800 | -3.16692100 L |
| H-H_ | -0.33720200 | 14.02366900 | -4.75684800 L |
| H-H_ | 2.59147900  | 14.16627200 | -7.72713600 L |
| H-H_ | 0.17687400  | 21.19641200 | -4.06641800 L |
| H-H_ | -1.35540400 | 19.39375200 | -3.45261600 L |
| H-H_ | 1.48048500  | 16.98298800 | -6.77515100 L |
| H-H_ | 1.37693900  | 21.55174800 | -0.01853500 L |
| H-H_ | -0.24575800 | 19.82289600 | 0.60807000 L  |
| H-H_ | 4.80635200  | 14.90592000 | -5.18738400 L |
| H-H_ | -6.35057900 | 15.13403100 | 1.10678800 L  |
| H-H_ | -6.42231600 | 17.37606400 | 2.10386600 L  |
| H-H_ | 1.62239200  | 12.69204200 | -3.86941200 L |
| H-H_ | 6.29877500  | 16.32517900 | -6.50010700 L |
| H-H_ | 2.98817600  | 18.41578400 | -8.06808400 L |
| H-H_ | 2.19881100  | 10.00555100 | -7.09914100 L |
| H-H_ | -0.12534500 | 23.89938200 | -1.87420000 L |
| H-H_ | 5.41172000  | 18.08284900 | -7.91678100 L |
| H-H_ | 2.71114300  | 11.88786300 | -8.56843900 L |
| H-H_ | 4.10399500  | 23.70238000 | -1.62291100 L |
| H-H_ | -0.07297300 | 26.10378000 | -0.81615100 L |
| H-H_ | 1.59772700  | 10.42501000 | -4.79067600 L |
| H-H_ | 4.57229000  | 23.37722800 | -6.05086500 L |
| H-H_ | 3.08218000  | 24.03628100 | -4.23649300 L |
| H-H_ | 2.80029000  | 19.94799300 | -3.09074200 L |
| H-H_ | 4.12922900  | 25.94376200 | -0.61349000 L |
| H-H_ | 2.04499300  | 27.13905900 | -0.22222400 L |
| H-H_ | 4.22760000  | 19.35246000 | -4.97874300 L |
| H-H_ | 5.14336900  | 21.07649800 | -6.45537100 L |
| H-H_ | 3.00161900  | 11.01318100 | 4.57017000 L  |
| H-H_ | 1.43578400  | 11.91356800 | 6.18721800 L  |
| H-H_ | -1.38202200 | 8.93319300  | 5.05892300 L  |
| H-H_ | 0.18561300  | 8.02682100  | 3.47035200 L  |
| H-H_ | 3.11433700  | 8.17015800  | 0.50074200 L  |
| H-H_ | 0.69873400  | 15.20029700 | 4.16152300 L  |
| H-H_ | -0.83267300 | 13.39543700 | 4.77322800 L  |
| H-H_ | 2.00321600  | 10.98467300 | 1.45069300 L  |
| H-H_ | 1.90066300  | 15.55484700 | 8.20719200 L  |
| H-H_ | 0.27805600  | 13.82604800 | 8.83520700 L  |
| H-H_ | 5.32921400  | 8.90839300  | 3.04054800 L  |
| H-H_ | -5.82780600 | 9.13644900  | 9.33331000 L  |
| H-H_ | -5.89958500 | 11.37774900 | 10.32970900 L |
| H-H_ | 2.14516500  | 6.69446000  | 4.35710900 L  |
| H-H_ | 6.82141700  | 10.32681000 | 1.72432600 L  |
| H-H_ | 3.51090700  | 12.41746900 | 0.15775900 L  |

|      |             |             |               |
|------|-------------|-------------|---------------|
| H-H_ | 2.72049300  | 4.00932800  | 1.12597900 L  |
| H-H_ | 0.39751700  | 17.90185500 | 6.35373200 L  |
| H-H_ | 5.93462000  | 12.08746800 | 0.31177500 L  |
| H-H_ | 3.23400100  | 5.89174900  | -0.34056100 L |
| H-H_ | 4.62690400  | 17.70417400 | 6.60575300 L  |
| H-H_ | 0.44975400  | 20.10687800 | 7.40963900 L  |
| H-H_ | 2.12058900  | 4.42748200  | 3.43725600 L  |
| H-H_ | 5.09397600  | 17.37959200 | 2.17430900 L  |
| H-H_ | 3.60608200  | 18.03948800 | 3.99205400 L  |
| H-H_ | 3.32305900  | 13.95182500 | 5.13572600 L  |
| H-H_ | 4.65190900  | 19.94754000 | 7.61156800 L  |
| H-H_ | 2.56785600  | 21.14153200 | 8.00570800 L  |
| H-H_ | 4.75041600  | 13.35561300 | 3.24845700 L  |
| H-H_ | 5.66623100  | 15.07897100 | 1.77256100 L  |
| H-H_ | 3.52434600  | 5.01627900  | 12.79596000 L |
| H-H_ | 1.95960200  | 5.91530700  | 14.41440900 L |
| H-H_ | -0.85916400 | 2.93707900  | 13.28680100 L |
| H-H_ | 0.70847600  | 2.02929400  | 11.69828400 L |
| H-H_ | 3.63810800  | 2.17257700  | 8.72720100 L  |
| H-H_ | 1.22245800  | 9.20339600  | 12.38724900 L |
| H-H_ | -0.30986200 | 7.40000300  | 13.00037400 L |
| H-H_ | 2.52589600  | 4.98845100  | 9.67575000 L  |
| H-H_ | 2.42243400  | 9.55867800  | 16.43372300 L |
| H-H_ | 0.80087600  | 7.82778800  | 17.06246100 L |
| H-H_ | 5.85293900  | 2.91149200  | 11.26627500 L |
| H-H_ | -5.30608200 | 3.14096000  | 17.55910800 L |
| H-H_ | -5.37572900 | 5.38163500  | 18.55752400 L |
| H-H_ | 2.66798100  | 0.69761300  | 12.58430900 L |
| H-H_ | 7.34427000  | 4.33210900  | 9.95215100 L  |
| H-H_ | 4.03368100  | 6.41988800  | 8.38428100 L  |
| H-H_ | 3.24426400  | -1.98825300 | 9.35243800 L  |
| H-H_ | 0.92029100  | 11.90427400 | 14.58025400 L |
| H-H_ | 6.45735100  | 6.08915300  | 8.53761900 L  |
| H-H_ | 3.75668100  | -0.10447300 | 7.88449700 L  |
| H-H_ | 5.14962700  | 11.70868500 | 14.83148900 L |
| H-H_ | 0.97252700  | 14.10929700 | 15.63616100 L |
| H-H_ | 2.64336200  | -1.57009900 | 11.66377800 L |
| H-H_ | 5.61674900  | 11.38201100 | 10.40083100 L |
| H-H_ | 4.12880900  | 12.04258600 | 12.21784400 L |
| H-H_ | 3.84583300  | 7.95424300  | 13.36224700 L |
| H-H_ | 5.17468200  | 13.94995800 | 15.83809000 L |
| H-H_ | 3.09062900  | 15.14395000 | 16.23223000 L |
| H-H_ | 5.27318900  | 7.35803100  | 11.47497900 L |
| H-H_ | 6.18900500  | 9.08138900  | 9.99908300 L  |

|      |             |             |               |
|------|-------------|-------------|---------------|
| H-H_ | 2.40534700  | 0.68258800  | -4.98106200 L |
| H-H_ | 0.83951200  | 1.58297500  | -3.36401400 L |
| H-H_ | -1.97829400 | -1.39740000 | -4.49230900 L |
| H-H_ | -0.41065800 | -2.30377200 | -6.08088000 L |
| H-H_ | 2.51806500  | -2.16043500 | -9.05049000 L |
| H-H_ | 0.10246200  | 4.86970400  | -5.38971000 L |
| H-H_ | -1.42894500 | 3.06484400  | -4.77800400 L |
| H-H_ | 1.40694400  | 0.65408100  | -8.10054000 L |
| H-H_ | 1.30439100  | 5.22425400  | -1.34404000 L |
| H-H_ | -0.31821600 | 3.49545600  | -0.71602500 L |
| H-H_ | 4.73294200  | -1.42220000 | -6.51068400 L |
| H-H_ | -6.42407800 | -1.19414300 | -0.21792300 L |
| H-H_ | -6.49585700 | 1.04715600  | 0.77847700 L  |
| H-H_ | 1.54889300  | -3.63613200 | -5.19412300 L |
| H-H_ | 6.22514500  | -0.00378300 | -7.82690600 L |
| H-H_ | 2.91463500  | 2.08687600  | -9.39347300 L |
| H-H_ | 2.12422100  | -6.32126500 | -8.42525300 L |
| H-H_ | -0.19875500 | 7.57126200  | -3.19750000 L |
| H-H_ | 5.33834800  | 1.75687500  | -9.23945700 L |
| H-H_ | 2.63772900  | -4.43884300 | -9.89179300 L |
| H-H_ | 4.03063200  | 7.37358100  | -2.94547900 L |
| H-H_ | -0.14651800 | 9.77628500  | -2.14159300 L |
| H-H_ | 1.52431700  | -5.90311000 | -6.11397600 L |
| H-H_ | 4.49770400  | 7.04899900  | -7.37692300 L |
| H-H_ | 3.00981000  | 7.70889500  | -5.55917800 L |
| H-H_ | 2.72678800  | 3.62123200  | -4.41550700 L |
| H-H_ | 4.05563700  | 9.61694700  | -1.93966400 L |
| H-H_ | 1.97158400  | 10.81093900 | -1.54552400 L |
| H-H_ | 4.15414400  | 3.02502000  | -6.30277500 L |
| H-H_ | 5.06995900  | 4.74837800  | -7.77867100 L |
| H-H_ | 2.92807400  | -5.31431300 | 3.24472800 L  |
| H-H_ | 1.36333000  | -4.41528500 | 4.86317600 L  |
| H-H_ | -1.45543600 | -7.39351400 | 3.73556900 L  |
| H-H_ | 0.11220400  | -8.30129900 | 2.14705200 L  |
| H-H_ | 3.04183600  | -8.15801600 | -0.82403100 L |
| H-H_ | 0.62618600  | -1.12719700 | 2.83601700 L  |
| H-H_ | -0.90613400 | -2.93059000 | 3.44914200 L  |
| H-H_ | 1.92962400  | -5.34214200 | 0.12451800 L  |
| H-H_ | 1.82616200  | -0.77191500 | 6.88249000 L  |
| H-H_ | 0.20460400  | -2.50280500 | 7.51122900 L  |
| H-H_ | 5.25666700  | -7.41910100 | 1.71504200 L  |
| H-H_ | -5.90235400 | -7.18963300 | 8.00787600 L  |
| H-H_ | -5.97200100 | -4.94895800 | 9.00629200 L  |
| H-H_ | 2.07170900  | -9.63298000 | 3.03307700 L  |

|      |             |              |                |
|------|-------------|--------------|----------------|
| H-H_ | 6.74799800  | -5.99848400  | 0.40091800 L   |
| H-H_ | 3.43740900  | -3.91070500  | -1.16695100 L  |
| H-H_ | 2.64799200  | -12.31884600 | -0.19879400 L  |
| H-H_ | 0.32401900  | 1.57368100   | 5.02902200 L   |
| H-H_ | 5.86107900  | -4.24144000  | -1.01361300 L  |
| H-H_ | 3.16040900  | -10.43506600 | -1.66673600 L  |
| H-H_ | 4.55335500  | 1.37809200   | 5.28025700 L   |
| H-H_ | 0.37625500  | 3.77870400   | 6.08492800 L   |
| H-H_ | 2.04709100  | -11.90069200 | 2.11254500 L   |
| H-H_ | 5.02047700  | 1.05141800   | 0.84959900 L   |
| H-H_ | 3.53253700  | 1.71199300   | 2.66661100 L   |
| H-H_ | 3.24956100  | -2.37634900  | 3.81101500 L   |
| H-H_ | 4.57841000  | 3.61936500   | 6.28685700 L   |
| H-H_ | 2.49435700  | 4.81335800   | 6.68099800 L   |
| H-H_ | 4.67691700  | -2.97256200  | 1.92374600 L   |
| H-H_ | 5.59273300  | -1.24920300  | 0.44785100 L   |
| H-H_ | 8.96421900  | 11.84965700  | -8.85998600 L  |
| H-H_ | 10.71873800 | 12.75136100  | -7.45312400 L  |
| H-H_ | 13.37707900 | 9.77651600   | -8.92632000 L  |
| H-H_ | 11.62128600 | 8.86594400   | -10.30581900 L |
| H-H_ | 8.34430900  | 9.00471300   | -12.88455000 L |
| H-H_ | 11.18924300 | 16.03810200  | -9.55569300 L  |
| H-H_ | 12.79177300 | 14.23811300  | -9.13900600 L  |
| H-H_ | 9.56268200  | 11.82286900  | -12.07954000 L |
| H-H_ | 10.50904800 | 16.39227700  | -5.38917000 L  |
| H-H_ | 12.19776500 | 14.66547000  | -4.97150500 L  |
| H-H_ | 6.46537000  | 9.74115400   | -10.08575600 L |
| H-H_ | 18.32461700 | 9.98416100   | -5.24456900 L  |
| H-H_ | 18.51635600 | 12.22635700  | -4.26411600 L  |
| H-H_ | 9.79341200  | 7.53197700   | -9.17940600 L  |
| H-H_ | 4.81799100  | 11.15915200  | -11.20110200 L |
| H-H_ | 7.90267300  | 13.25370800  | -13.17260200 L |
| H-H_ | 8.81592100  | 4.84452600   | -12.31108800 L |
| H-H_ | 11.76228400 | 18.74161400  | -7.41870000 L  |
| H-H_ | 5.51778000  | 12.91780200  | -12.71790100 L |
| H-H_ | 8.12364900  | 6.72609500   | -13.70437900 L |
| H-H_ | 7.59831700  | 18.53942700  | -6.63781900 L  |
| H-H_ | 11.84060400 | 20.94602700  | -6.36228800 L  |
| H-H_ | 9.70292500  | 5.26422500   | -10.09578200 L |
| H-H_ | 6.57662100  | 18.21267400  | -10.97102500 L |
| H-H_ | 8.28215100  | 18.87511500  | -9.35834200 L  |
| H-H_ | 8.71085300  | 14.78585200  | -8.25737300 L  |
| H-H_ | 7.69740300  | 20.78085400  | -5.63305800 L  |
| H-H_ | 9.81485800  | 21.97806700  | -5.50617100 L  |



|      |             |             |                |
|------|-------------|-------------|----------------|
| H-H_ | 7.05824100  | 14.18909700 | -9.95177500 L  |
| H-H_ | 5.96496400  | 15.91116000 | -11.30231900 L |
| H-H_ | 9.48699200  | 5.85207500  | -0.63346500 L  |
| H-H_ | 11.24055500 | 6.75451200  | 0.77413900 L   |
| H-H_ | 13.89981000 | 3.77820100  | -0.70047600 L  |
| H-H_ | 12.14414800 | 2.86841700  | -2.07788700 L  |
| H-H_ | 8.86716700  | 3.00859900  | -4.65667100 L  |
| H-H_ | 11.71305700 | 10.04125500 | -1.32855600 L  |
| H-H_ | 13.31450400 | 8.23979800  | -0.91316200 L  |
| H-H_ | 10.08541300 | 5.82455400  | -3.85369700 L  |
| H-H_ | 11.03172800 | 10.39605500 | 2.83588700 L   |
| H-H_ | 12.72058100 | 8.66862300  | 3.25569500 L   |
| H-H_ | 6.98818600  | 3.74430600  | -1.85855600 L  |
| H-H_ | 18.84734400 | 3.98726000  | 2.98122100 L   |
| H-H_ | 19.03912900 | 6.22877600  | 3.96240600 L   |
| H-H_ | 10.31618500 | 1.53439600  | -0.95288400 L  |
| H-H_ | 5.34063300  | 5.16078300  | -2.97666800 L  |
| H-H_ | 8.42540400  | 7.25539300  | -4.94675800 L  |
| H-H_ | 9.33959900  | -1.15169500 | -4.08609400 L  |
| H-H_ | 12.28514600 | 12.74408600 | 0.80923200 L   |
| H-H_ | 6.04068000  | 6.92242100  | -4.48934400 L  |
| H-H_ | 8.64646100  | 0.73066000  | -5.47723300 L  |
| H-H_ | 8.12118300  | 12.54048600 | 1.59016700 L   |
| H-H_ | 12.36328900 | 14.94839200 | 1.86282300 L   |
| H-H_ | 10.22474200 | -0.73262400 | -1.86851900 L  |
| H-H_ | 7.10025700  | 12.21571900 | -2.74670800 L  |
| H-H_ | 8.80401600  | 12.87758700 | -1.13034700 L  |
| H-H_ | 9.23366500  | 8.79041800  | -0.03022700 L  |
| H-H_ | 8.22003700  | 14.78531100 | 2.59126700 L   |
| H-H_ | 10.33767400 | 15.98121900 | 2.72102900 L   |
| H-H_ | 7.58109900  | 8.19298300  | -1.72389700 L  |
| H-H_ | 6.48777900  | 9.91431200  | -3.07511900 L  |
| H-H_ | 10.00967200 | -0.14414700 | 7.59159300 L   |
| H-H_ | 11.76337500 | 0.75625200  | 9.00139300 L   |
| H-H_ | 14.42266800 | -2.21791300 | 7.52740200 L   |
| H-H_ | 12.66692100 | -3.12916500 | 6.14863400 L   |
| H-H_ | 9.38894200  | -2.98898300 | 3.56991300 L   |
| H-H_ | 12.23478500 | 4.04435300  | 6.89729700 L   |
| H-H_ | 13.83731500 | 2.24436300  | 7.31398400 L   |
| H-H_ | 10.60814000 | -0.17234800 | 4.37209300 L   |
| H-H_ | 11.55454300 | 4.39920700  | 11.06308700 L  |
| H-H_ | 13.24335800 | 2.66962800  | 11.48227000 L  |
| H-H_ | 7.50991400  | -2.25259700 | 6.36729700 L   |
| H-H_ | 19.37111100 | -2.00890800 | 11.20762500 L  |

|      |              |             |                |
|------|--------------|-------------|----------------|
| H-H_ | 19.56199200  | 0.23124800  | 12.19033800 L  |
| H-H_ | 10.83900100  | -4.46245200 | 7.27431500 L   |
| H-H_ | 5.86348600   | -0.83391800 | 5.25115600 L   |
| H-H_ | 8.94817800   | 1.25781200  | 3.27976400 L   |
| H-H_ | 9.86241900   | -7.14995600 | 4.14116000 L   |
| H-H_ | 12.80791900  | 6.74650500  | 9.03575300 L   |
| H-H_ | 6.56341100   | 0.92410600  | 3.73649900 L   |
| H-H_ | 9.16918700   | -5.26624200 | 2.74855700 L   |
| H-H_ | 8.64390600   | 6.54499800  | 9.81590200 L   |
| H-H_ | 12.88606200  | 8.95081000  | 10.08934500 L  |
| H-H_ | 10.74751600  | -6.73020500 | 6.35800300 L   |
| H-H_ | 7.62303000   | 6.21813800  | 5.47981300 L   |
| H-H_ | 9.32674200   | 6.88068500  | 7.09544200 L   |
| H-H_ | 9.75634900   | 2.79278200  | 8.19488400 L   |
| H-H_ | 8.74285700   | 8.78705000  | 10.81852100 L  |
| H-H_ | 10.86044700  | 9.98363800  | 10.94755000 L  |
| H-H_ | 8.10387300   | 2.19540100  | 6.50262400 L   |
| H-H_ | 7.01055300   | 3.91673100  | 5.15140200 L   |
| H-H_ | -15.61789200 | 11.83447100 | -7.30893000 L  |
| H-H_ | -13.86337300 | 12.73617500 | -5.90206800 L  |
| H-H_ | -11.20503200 | 9.76133000  | -7.37526400 L  |
| H-H_ | -12.96082500 | 8.85075900  | -8.75476300 L  |
| H-H_ | -16.23780200 | 8.98952800  | -11.33349400 L |
| H-H_ | -13.39286700 | 16.02291700 | -8.00463700 L  |
| H-H_ | -11.79033700 | 14.22292700 | -7.58795000 L  |
| H-H_ | -15.01942800 | 11.80768300 | -10.52848400 L |
| H-H_ | -14.07306300 | 16.37709100 | -3.83811500 L  |
| H-H_ | -12.38434500 | 14.65028500 | -3.42045000 L  |
| H-H_ | -18.11674000 | 9.72596800  | -8.53470000 L  |
| H-H_ | -6.25749300  | 9.96897600  | -3.69351300 L  |
| H-H_ | -6.06575400  | 12.21117200 | -2.71306000 L  |
| H-H_ | -14.78869800 | 7.51679200  | -7.62835000 L  |
| H-H_ | -19.76412000 | 11.14396600 | -9.65004600 L  |
| H-H_ | -16.67943700 | 13.23852200 | -11.62154600 L |
| H-H_ | -15.76618900 | 4.82934100  | -10.76003200 L |
| H-H_ | -12.81982700 | 18.72642800 | -5.86764500 L  |
| H-H_ | -19.06433000 | 12.90261600 | -11.16684500 L |
| H-H_ | -16.45846100 | 6.71090900  | -12.15332300 L |
| H-H_ | -16.98379400 | 18.52424100 | -5.08676400 L  |
| H-H_ | -12.74150600 | 20.93084200 | -4.81123300 L  |
| H-H_ | -14.87918600 | 5.24903900  | -8.54472600 L  |
| H-H_ | -18.00548900 | 18.19748900 | -9.41996900 L  |
| H-H_ | -16.29995900 | 18.85992900 | -7.80728600 L  |
| H-H_ | -15.87125700 | 14.77066700 | -6.70631700 L  |

|      |              |             |               |
|------|--------------|-------------|---------------|
| H-H_ | -16.88470700 | 20.76566800 | -4.08200200 L |
| H-H_ | -14.76725200 | 21.96288200 | -3.95511500 L |
| H-H_ | -17.52386900 | 14.17391100 | -8.40072000 L |
| H-H_ | -18.61714700 | 15.89597400 | -9.75126300 L |
| H-H_ | -15.09511800 | 5.83689000  | 0.91759100 L  |
| H-H_ | -13.34155500 | 6.73932700  | 2.32519500 L  |
| H-H_ | -10.68230100 | 3.76301500  | 0.85057900 L  |
| H-H_ | -12.43796300 | 2.85323100  | -0.52683100 L |
| H-H_ | -15.71494400 | 2.99341400  | -3.10561600 L |
| H-H_ | -12.86905400 | 10.02607000 | 0.22250000 L  |
| H-H_ | -11.26760600 | 8.22461200  | 0.63789400 L  |
| H-H_ | -14.49669700 | 5.80936800  | -2.30264100 L |
| H-H_ | -13.55038300 | 10.38086900 | 4.38694300 L  |
| H-H_ | -11.86153000 | 8.65343700  | 4.80675000 L  |
| H-H_ | -17.59392500 | 3.72912000  | -0.30750000 L |
| H-H_ | -5.73476700  | 3.97207400  | 4.53227600 L  |
| H-H_ | -5.54298100  | 6.21359000  | 5.51346200 L  |
| H-H_ | -14.26592500 | 1.51921000  | 0.59817100 L  |
| H-H_ | -19.24147800 | 5.14559700  | -1.42561300 L |
| H-H_ | -16.15670600 | 7.24020700  | -3.39570200 L |
| H-H_ | -15.24251100 | -1.16688100 | -2.53503800 L |
| H-H_ | -12.29696400 | 12.72890100 | 2.36028800 L  |
| H-H_ | -18.54143000 | 6.90723600  | -2.93828800 L |
| H-H_ | -15.93565000 | 0.71547500  | -3.92617700 L |
| H-H_ | -16.46092700 | 12.52530100 | 3.14122200 L  |
| H-H_ | -12.21882200 | 14.93320600 | 3.41387900 L  |
| H-H_ | -14.35736800 | -0.74780900 | -0.31746300 L |
| H-H_ | -17.48185400 | 12.20053400 | -1.19565300 L |
| H-H_ | -15.77809500 | 12.86240100 | 0.42070900 L  |
| H-H_ | -15.34844600 | 8.77523200  | 1.52082900 L  |
| H-H_ | -16.36207400 | 14.77012600 | 4.14232300 L  |
| H-H_ | -14.24443700 | 15.96603400 | 4.27208500 L  |
| H-H_ | -17.00101100 | 8.17779700  | -0.17284100 L |
| H-H_ | -18.09433100 | 9.89912700  | -1.52406400 L |
| H-H_ | -14.57243800 | -0.15933200 | 9.14264900 L  |
| H-H_ | -12.81873500 | 0.74106600  | 10.55244900 L |
| H-H_ | -10.15944300 | -2.23309900 | 9.07845800 L  |
| H-H_ | -11.91518900 | -3.14435000 | 7.69969000 L  |
| H-H_ | -15.19316900 | -3.00416800 | 5.12096900 L  |
| H-H_ | -12.34732500 | 4.02916700  | 8.44835300 L  |
| H-H_ | -10.74479500 | 2.22917800  | 8.86504000 L  |
| H-H_ | -13.97397100 | -0.18753300 | 5.92314900 L  |
| H-H_ | -13.02756700 | 4.38402100  | 12.61414300 L |
| H-H_ | -11.33875200 | 2.65444300  | 13.03332600 L |

|      |              |              |                |
|------|--------------|--------------|----------------|
| H-H_ | -17.07219600 | -2.26778200  | 7.91835300 L   |
| H-H_ | -5.21100000  | -2.02409300  | 12.75868100 L  |
| H-H_ | -5.02011900  | 0.21606300   | 13.74139400 L  |
| H-H_ | -13.74310900 | -4.47763700  | 8.82537100 L   |
| H-H_ | -18.71862400 | -0.84910400  | 6.80221200 L   |
| H-H_ | -15.63393300 | 1.24262600   | 4.83081900 L   |
| H-H_ | -14.71969100 | -7.16514200  | 5.69221600 L   |
| H-H_ | -11.77419100 | 6.73132000   | 10.58680900 L  |
| H-H_ | -18.01869900 | 0.90892100   | 5.28755500 L   |
| H-H_ | -15.41292300 | -5.28142700  | 4.29961200 L   |
| H-H_ | -15.93820500 | 6.52981200   | 11.36695800 L  |
| H-H_ | -11.69604900 | 8.93562500   | 11.64040000 L  |
| H-H_ | -13.83459500 | -6.74539000  | 7.90905900 L   |
| H-H_ | -16.95908000 | 6.20295300   | 7.03086900 L   |
| H-H_ | -15.25536800 | 6.86550000   | 8.64649800 L   |
| H-H_ | -14.82576200 | 2.77759700   | 9.74594000 L   |
| H-H_ | -15.83925400 | 8.77186500   | 12.36957700 L  |
| H-H_ | -13.72166300 | 9.96845300   | 12.49860600 L  |
| H-H_ | -16.47823800 | 2.18021600   | 8.05368000 L   |
| H-H_ | -17.57155800 | 3.90154500   | 6.70245800 L   |
| H-H_ | 8.89072000   | -4.47851700  | -10.18469700 L |
| H-H_ | 10.64428400  | -3.57608000  | -8.77709300 L  |
| H-H_ | 13.30353800  | -6.55239200  | -10.25170900 L |
| H-H_ | 11.54787600  | -7.46217600  | -11.62912000 L |
| H-H_ | 8.27089500   | -7.32199400  | -14.20790400 L |
| H-H_ | 11.11678500  | -0.28933800  | -10.87978800 L |
| H-H_ | 12.71823200  | -2.09079500  | -10.46439500 L |
| H-H_ | 9.48914100   | -4.50603900  | -13.40492900 L |
| H-H_ | 10.43545600  | 0.06546200   | -6.71534500 L  |
| H-H_ | 12.12430900  | -1.66197000  | -6.29553800 L  |
| H-H_ | 6.39191400   | -6.58628700  | -11.40978800 L |
| H-H_ | 18.25107200  | -6.34333300  | -6.57001200 L  |
| H-H_ | 18.44285800  | -4.10181700  | -5.58882600 L  |
| H-H_ | 9.71991400   | -8.79619700  | -10.50411700 L |
| H-H_ | 4.74436100   | -5.16981000  | -12.52790100 L |
| H-H_ | 7.82913200   | -3.07520000  | -14.49799000 L |
| H-H_ | 8.74332800   | -11.48228800 | -13.63732600 L |
| H-H_ | 11.68887400  | 2.41349400   | -8.74200100 L  |
| H-H_ | 5.44440900   | -3.40817100  | -14.04057600 L |
| H-H_ | 8.05018900   | -9.59993200  | -15.02846500 L |
| H-H_ | 7.52491200   | 2.20989400   | -7.96106600 L  |
| H-H_ | 11.76701700  | 4.61779900   | -7.68840900 L  |
| H-H_ | 9.62847100   | -11.06321600 | -11.41975100 L |
| H-H_ | 6.50398500   | 1.88512700   | -12.29794100 L |

|      |              |              |                |
|------|--------------|--------------|----------------|
| H-H_ | 8.20774400   | 2.54699400   | -10.68157900 L |
| H-H_ | 8.63739300   | -1.54017500  | -9.58145900 L  |
| H-H_ | 7.62376500   | 4.45471800   | -6.95996500 L  |
| H-H_ | 9.74140200   | 5.65062700   | -6.83020300 L  |
| H-H_ | 6.98482800   | -2.13761000  | -11.27512900 L |
| H-H_ | 5.89150800   | -0.41628100  | -12.62635200 L |
| H-H_ | 9.41340000   | -10.47474000 | -1.95963900 L  |
| H-H_ | 11.16710400  | -9.57434100  | -0.54983900 L  |
| H-H_ | 13.82639600  | -12.54850600 | -2.02383100 L  |
| H-H_ | 12.07064900  | -13.45975700 | -3.40259800 L  |
| H-H_ | 8.79267000   | -13.31957600 | -5.98131900 L  |
| H-H_ | 11.63851400  | -6.28624000  | -2.65393600 L  |
| H-H_ | 13.24104400  | -8.08623000  | -2.23724800 L  |
| H-H_ | 10.01186800  | -10.50294100 | -5.17914000 L  |
| H-H_ | 10.95827100  | -5.93138600  | 1.51185500 L   |
| H-H_ | 12.64708700  | -7.66096500  | 1.93103800 L   |
| H-H_ | 6.91364200   | -12.58318900 | -3.18393500 L  |
| H-H_ | 18.77483900  | -12.33950100 | 1.65639300 L   |
| H-H_ | 18.96572000  | -10.09934400 | 2.63910600 L   |
| H-H_ | 10.24272900  | -14.79304500 | -2.27691700 L  |
| H-H_ | 5.26721500   | -11.16451100 | -4.30007600 L  |
| H-H_ | 8.35190600   | -9.07278100  | -6.27146900 L  |
| H-H_ | 9.26614800   | -17.48054900 | -5.41007200 L  |
| H-H_ | 12.21164700  | -3.58408800  | -0.51547900 L  |
| H-H_ | 5.96713900   | -9.40648600  | -5.81473300 L  |
| H-H_ | 8.57291600   | -15.59683400 | -6.80267600 L  |
| H-H_ | 8.04763400   | -3.78559500  | 0.26467000 L   |
| H-H_ | 12.28979000  | -1.37978200  | 0.53811200 L   |
| H-H_ | 10.15124400  | -17.06079800 | -3.19323000 L  |
| H-H_ | 7.02675800   | -4.11245500  | -4.07141900 L  |
| H-H_ | 8.73047000   | -3.44990800  | -2.45579000 L  |
| H-H_ | 9.16007700   | -7.53781100  | -1.35634800 L  |
| H-H_ | 8.14658500   | -1.54354300  | 1.26728900 L   |
| H-H_ | 10.26417500  | -0.34695500  | 1.39631800 L   |
| H-H_ | 7.50760100   | -8.13519200  | -3.04860800 L  |
| H-H_ | 6.41428100   | -6.41386200  | -4.39983000 L  |
| H-H_ | -15.69139000 | -4.49370300  | -8.63364100 L  |
| H-H_ | -13.93782700 | -3.59126600  | -7.22603700 L  |
| H-H_ | -11.27857300 | -6.56757700  | -8.70065300 L  |
| H-H_ | -13.03423400 | -7.47736100  | -10.07806400 L |
| H-H_ | -16.31121600 | -7.33717900  | -12.65684800 L |
| H-H_ | -13.46532600 | -0.30452300  | -9.32873200 L  |
| H-H_ | -11.86387800 | -2.10598000  | -8.91333900 L  |
| H-H_ | -15.09296900 | -4.52122400  | -11.85387300 L |

|      |              |              |                |
|------|--------------|--------------|----------------|
| H-H_ | -14.14665500 | 0.05027600   | -5.16428900 L  |
| H-H_ | -12.45780200 | -1.67715600  | -4.74448200 L  |
| H-H_ | -18.19019700 | -6.60147200  | -9.85873200 L  |
| H-H_ | -6.33103900  | -6.35851900  | -5.01895600 L  |
| H-H_ | -6.13925300  | -4.11700200  | -4.03777000 L  |
| H-H_ | -14.86219700 | -8.81138200  | -8.95306100 L  |
| H-H_ | -19.83775000 | -5.18499500  | -10.97684500 L |
| H-H_ | -16.75297800 | -3.09038500  | -12.94693500 L |
| H-H_ | -15.83878300 | -11.49747400 | -12.08627000 L |
| H-H_ | -12.89323600 | 2.39830800   | -7.19094500 L  |
| H-H_ | -19.13770200 | -3.42335700  | -12.48952100 L |
| H-H_ | -16.53192200 | -9.61511800  | -13.47740900 L |
| H-H_ | -17.05719900 | 2.19470800   | -6.41001000 L  |
| H-H_ | -12.81509400 | 4.60261400   | -6.13735300 L  |
| H-H_ | -14.95364000 | -11.07840200 | -9.86869500 L  |
| H-H_ | -18.07812600 | 1.86994100   | -10.74688500 L |
| H-H_ | -16.37436700 | 2.53180900   | -9.13052400 L  |
| H-H_ | -15.94471800 | -1.55536100  | -8.03040300 L  |
| H-H_ | -16.95834600 | 4.43953300   | -5.40890900 L  |
| H-H_ | -14.84070800 | 5.63544100   | -5.27914800 L  |
| H-H_ | -17.59728300 | -2.15279600  | -9.72407400 L  |
| H-H_ | -18.69060300 | -0.43146600  | -11.07529600 L |
| H-H_ | -15.16871000 | -10.48992500 | -0.40858300 L  |
| H-H_ | -13.41500700 | -9.58952700  | 1.00121700 L   |
| H-H_ | -10.75571500 | -12.56369100 | -0.47277500 L  |
| H-H_ | -12.51146100 | -13.47494300 | -1.85154200 L  |
| H-H_ | -15.78944000 | -13.33476100 | -4.43026300 L  |
| H-H_ | -12.94359700 | -6.30142500  | -1.10288000 L  |
| H-H_ | -11.34106700 | -8.10141500  | -0.68619300 L  |
| H-H_ | -14.57024200 | -10.51812600 | -3.62808400 L  |
| H-H_ | -13.62383900 | -5.94657100  | 3.06291100 L   |
| H-H_ | -11.93502400 | -7.67615000  | 3.48209400 L   |
| H-H_ | -17.66846800 | -12.59837500 | -1.63287900 L  |
| H-H_ | -5.80727200  | -12.35468600 | 3.20744900 L   |
| H-H_ | -5.61639100  | -10.11453000 | 4.19016200 L   |
| H-H_ | -14.33938100 | -14.80823000 | -0.72586100 L  |
| H-H_ | -19.31489600 | -11.17969600 | -2.74902100 L  |
| H-H_ | -16.23020500 | -9.08796700  | -4.72041300 L  |
| H-H_ | -15.31596300 | -17.49573500 | -3.85901600 L  |
| H-H_ | -12.37046300 | -3.59927300  | 1.03557700 L   |
| H-H_ | -18.61497100 | -9.42167200  | -4.26367700 L  |
| H-H_ | -16.00919500 | -15.61202000 | -5.25162000 L  |
| H-H_ | -16.53447700 | -3.80078000  | 1.81572600 L   |
| H-H_ | -12.29232100 | -1.39496800  | 2.08916800 L   |

|      |              |              |                |
|------|--------------|--------------|----------------|
| H-H_ | -14.43086700 | -17.07598300 | -1.64217400 L  |
| H-H_ | -17.55535200 | -4.12764000  | -2.52036300 L  |
| H-H_ | -15.85164000 | -3.46509300  | -0.90473400 L  |
| H-H_ | -15.42203300 | -7.55299600  | 0.19470800 L   |
| H-H_ | -16.43552600 | -1.55872800  | 2.81834500 L   |
| H-H_ | -14.31793500 | -0.36214000  | 2.94737400 L   |
| H-H_ | -17.07451000 | -8.15037700  | -1.49755200 L  |
| H-H_ | -18.16783000 | -6.42904800  | -2.84877400 L  |
| H-H_ | -3.24191400  | 5.73885800   | -6.79036100 L  |
| H-H_ | -1.67607900  | 4.83847200   | -8.40740900 L  |
| H-H_ | 1.14172700   | 7.81884600   | -7.27911400 L  |
| H-H_ | -0.42590800  | 8.72521800   | -5.69054300 L  |
| H-H_ | -3.35567600  | 8.58256100   | -2.72160200 L  |
| H-H_ | -0.93902800  | 1.55174300   | -6.38171400 L  |
| H-H_ | 0.59237900   | 3.35660200   | -6.99341900 L  |
| H-H_ | -2.24351100  | 5.76736600   | -3.67088400 L  |
| H-H_ | -2.14004900  | 1.19714000   | -10.42885600 L |
| H-H_ | -0.51844300  | 2.92735000   | -11.05686300 L |
| H-H_ | -5.57059500  | 7.84359200   | -5.26208600 L  |
| H-H_ | 5.58751600   | 7.61417700   | -11.55344700 L |
| H-H_ | 5.65920600   | 5.37282400   | -12.55125700 L |
| H-H_ | -2.38550200  | 10.05684600  | -6.57797900 L  |
| H-H_ | -7.06171100  | 6.42523000   | -3.94451700 L  |
| H-H_ | -3.75120200  | 4.33457000   | -2.37795000 L  |
| H-H_ | -2.96187800  | 12.74407000  | -3.34757100 L  |
| H-H_ | -0.63785800  | -1.14913600  | -8.57465500 L  |
| H-H_ | -6.17491500  | 4.66457200   | -2.53196600 L  |
| H-H_ | -3.47424900  | 10.85961100  | -1.87889800 L  |
| H-H_ | -4.86706300  | -0.95276000  | -8.82380200 L  |
| H-H_ | -0.69014200  | -3.35347900  | -9.63129400 L  |
| H-H_ | -2.36088400  | 12.32455700  | -5.65744700 L  |
| H-H_ | -5.33531500  | -0.62687400  | -4.39516900 L  |
| H-H_ | -3.84628800  | -1.28739400  | -6.21083500 L  |
| H-H_ | -3.56340100  | 2.80089500   | -7.35664900 L  |
| H-H_ | -4.89229600  | -3.19414100  | -9.83322300 L  |
| H-H_ | -2.80806100  | -4.38943800  | -10.22448900 L |
| H-H_ | -4.99079900  | 3.39637300   | -5.47005800 L  |
| H-H_ | -5.90647900  | 1.67238900   | -3.99202000 L  |
| H-H_ | -2.78295400  | -0.26847100  | 1.52143600 H   |
| H-H_ | -1.25815600  | -1.18003200  | -0.13075900 H  |
| H-H_ | 1.64334800   | 1.79270900   | 0.89634200 H   |
| H-H_ | 0.10073900   | 2.74074400   | 2.54062100 H   |
| H-H_ | -2.63633500  | 2.67136300   | 5.58370200 H   |
| H-H_ | -0.62947700  | -4.48115600  | 1.76932100 H   |

|      |             |              |               |
|------|-------------|--------------|---------------|
| H-H_ | 0.89884300  | -2.62266900  | 1.21425100 H  |
| H-H_ | -1.66643400 | -0.03459400  | 4.84556600 H  |
| H-H_ | -1.37096300 | -5.10171200  | -2.38556400 H |
| H-H_ | 0.12745500  | -3.22815500  | -2.93906500 H |
| H-H_ | -5.00662500 | 1.83048400   | 2.94799600 H  |
| H-H_ | 5.99819600  | 1.62816700   | -3.36863400 H |
| H-H_ | 6.10502200  | -0.64386600  | -4.32470700 H |
| H-H_ | -1.98339200 | 3.96645700   | 1.55232900 H  |
| H-H_ | -6.55327200 | 0.39255500   | 4.25367900 H  |
| H-H_ | -3.20328900 | -1.43531500  | 6.18348700 H  |
| H-H_ | -2.35111600 | 6.84897800   | 4.70724900 H  |
| H-H_ | 0.02903900  | -7.24040700  | -0.53089700 H |
| H-H_ | -5.64415100 | -1.25485500  | 5.86318900 H  |
| H-H_ | -2.65046800 | 5.01291300   | 6.33624600 H  |
| H-H_ | -4.24866200 | -7.22212600  | -0.73817200 H |
| H-H_ | 0.07323300  | -9.46177000  | -1.60191900 H |
| H-H_ | -1.97364200 | 6.31046000   | 2.30870000 H  |
| H-H_ | -4.57652400 | -7.18873200  | 3.68760700 H  |
| H-H_ | -3.09223400 | -7.63127800  | 1.79057200 H  |
| H-H_ | -3.20586400 | -3.48057600  | 0.73479200 H  |
| H-H_ | -4.20987300 | -9.46209100  | -1.77338300 H |
| H-H_ | -2.04471100 | -10.59860900 | -2.20651800 H |
| H-H_ | -4.66624600 | -3.03118700  | 2.66293600 H  |
| H-H_ | -5.36527800 | -4.88547300  | 4.16469000 H  |
| H-H_ | -2.19632500 | -6.25557100  | 9.66336000 L  |
| H-H_ | -0.63049000 | -7.15595700  | 8.04631300 L  |
| H-H_ | 2.18718500  | -4.17637000  | 9.17251900 L  |
| H-H_ | 0.61954500  | -3.26858500  | 10.76103600 L |
| H-H_ | -2.31008700 | -3.41186800  | 13.73211900 L |
| H-H_ | 0.10556300  | -10.44268700 | 10.07207100 L |
| H-H_ | 1.63788300  | -8.63929400  | 9.45894600 L  |
| H-H_ | -1.19787500 | -6.22774200  | 12.78357000 L |
| H-H_ | -1.09441300 | -10.79796900 | 6.02559800 L  |
| H-H_ | 0.52714500  | -9.06707900  | 5.39685900 L  |
| H-H_ | -4.52491800 | -4.15078300  | 11.19304600 L |
| H-H_ | 6.63410300  | -4.38025100  | 4.90021200 L  |
| H-H_ | 6.70375000  | -6.62092600  | 3.90179600 L  |
| H-H_ | -1.33991300 | -1.93758400  | 9.87574300 L  |
| H-H_ | -6.01624900 | -5.57140000  | 12.50717000 L |
| H-H_ | -2.70566000 | -7.65917900  | 14.07503900 L |
| H-H_ | -1.91629000 | 0.74964100   | 13.10615000 L |
| H-H_ | 0.40773000  | -13.14356500 | 7.87906600 L  |
| H-H_ | -5.12933000 | -7.32844400  | 13.92170100 L |
| H-H_ | -2.42866000 | -1.13481800  | 14.57482400 L |



|      |             |              |                |
|------|-------------|--------------|----------------|
| H-H_ | -3.82160600 | -12.94797600 | 7.62783100 L   |
| H-H_ | 0.35549400  | -15.34858800 | 6.82316000 L   |
| H-H_ | -1.31529500 | 0.33012800   | 10.79627500 L  |
| H-H_ | -4.28872800 | -12.62130200 | 12.05848900 L  |
| H-H_ | -2.80078800 | -13.28187700 | 10.24147700 L  |
| H-H_ | -2.51781200 | -9.19353500  | 9.09707300 L   |
| H-H_ | -3.84666100 | -15.18925000 | 6.62123100 L   |
| H-H_ | -1.76260800 | -16.38324200 | 6.22709100 L   |
| H-H_ | -3.94516800 | -8.59732300  | 10.98434200 L  |
| H-H_ | -4.86098400 | -10.32068100 | 12.46023700 L  |
| H-H_ | -3.31541200 | -10.58931600 | -8.11507200 L  |
| H-H_ | -1.74948800 | -11.48964800 | -9.73070900 L  |
| H-H_ | 1.06718400  | -8.50864900  | -8.60449400 L  |
| H-H_ | -0.49936000 | -7.60363500  | -7.01452200 L  |
| H-H_ | -3.42909000 | -7.74414600  | -4.04495600 L  |
| H-H_ | -1.01248000 | -14.77711100 | -7.70569200 L  |
| H-H_ | 0.51883800  | -12.97230500 | -8.31880800 L  |
| H-H_ | -2.31700900 | -10.56080800 | -4.99559400 L  |
| H-H_ | -2.21350500 | -15.13030100 | -11.75288800 L |
| H-H_ | -0.59190000 | -13.40009000 | -12.38089500 L |
| H-H_ | -5.64409400 | -8.48458200  | -6.58679700 L  |
| H-H_ | 5.51406000  | -8.71326400  | -12.87747900 L |
| H-H_ | 5.58583900  | -10.95456300 | -13.87387800 L |
| H-H_ | -2.45895800 | -6.27059500  | -7.90201100 L  |
| H-H_ | -7.13521000 | -9.90294400  | -5.26922800 L  |
| H-H_ | -3.82470000 | -11.99360400 | -3.70266100 L  |
| H-H_ | -3.03537700 | -3.58410400  | -4.67228200 L  |
| H-H_ | -0.71135700 | -17.47731000 | -9.89936600 L  |
| H-H_ | -6.24950500 | -11.66224400 | -3.85807800 L  |
| H-H_ | -3.54774700 | -5.46856300  | -3.20360900 L  |
| H-H_ | -4.94056200 | -17.28093400 | -10.14851200 L |
| H-H_ | -0.76359400 | -19.68233300 | -10.95527300 L |
| H-H_ | -2.43429300 | -4.00356300  | -6.98074700 L  |
| H-H_ | -5.40885600 | -16.95578100 | -5.72055800 L  |
| H-H_ | -3.91874600 | -17.61483400 | -7.53493000 L  |
| H-H_ | -3.63694200 | -13.52801300 | -8.68203800 L  |
| H-H_ | -4.96574800 | -19.52299500 | -11.15720200 L |
| H-H_ | -2.88169500 | -20.71698700 | -11.55134200 L |
| H-H_ | -5.06421300 | -12.93033400 | -6.79341200 L  |
| H-H_ | -5.98002900 | -14.65369200 | -5.31751700 L  |
| H-H_ | -2.79259700 | -16.58616300 | 0.11212800 L   |
| H-H_ | -1.22676200 | -17.48655000 | -1.50491900 L  |
| H-H_ | 1.59091300  | -14.50696300 | -0.37871300 L  |
| H-H_ | 0.02327300  | -13.59917800 | 1.20980400 L   |

|      |             |              |               |
|------|-------------|--------------|---------------|
| H-H_ | -2.90635900 | -13.74246100 | 4.18088700 L  |
| H-H_ | -0.49070900 | -20.77328000 | 0.52083900 L  |
| H-H_ | 1.04161100  | -18.96988700 | -0.09228600 L |
| H-H_ | -1.79414700 | -16.55833500 | 3.23233800 L  |
| H-H_ | -1.69068500 | -21.12856200 | -3.52563500 L |
| H-H_ | -0.06912600 | -19.39767200 | -4.15437300 L |
| H-H_ | -5.12118900 | -14.48137600 | 1.64181300 L  |
| H-H_ | 6.03783100  | -14.71084400 | -4.65102000 L |
| H-H_ | 6.10747900  | -16.95151900 | -5.64943600 L |
| H-H_ | -1.93618500 | -12.26817600 | 0.32451100 L  |
| H-H_ | -6.61252100 | -15.90199300 | 2.95593700 L  |
| H-H_ | -3.30193100 | -17.98977200 | 4.52380700 L  |
| H-H_ | -2.51256100 | -9.58095200  | 3.55491800 L  |
| H-H_ | -0.18854100 | -23.47415800 | -1.67216600 L |
| H-H_ | -5.72560200 | -17.65903700 | 4.37046900 L  |
| H-H_ | -3.02493200 | -11.46541100 | 5.02359100 L  |
| H-H_ | -4.41787700 | -23.27856900 | -1.92340100 L |
| H-H_ | -0.24077800 | -25.67918100 | -2.72807300 L |
| H-H_ | -1.91156700 | -10.00046500 | 1.24504300 L  |
| H-H_ | -4.88500000 | -22.95189500 | 2.50725700 L  |
| H-H_ | -3.39706000 | -23.61247000 | 0.69024400 L  |
| H-H_ | -3.11408400 | -19.52412700 | -0.45415900 L |
| H-H_ | -4.44293300 | -25.51984200 | -2.93000200 L |
| H-H_ | -2.35888000 | -26.71383500 | -3.32414200 L |
| H-H_ | -4.54144000 | -18.92791500 | 1.43310900 L  |
| H-H_ | -5.45725500 | -20.65127300 | 2.90900500 L  |

Cartesian coordinates of S<sub>0</sub> state of optimized CNQ-f-TPA in toluene:

|   |             |            |             |
|---|-------------|------------|-------------|
| C | -6.72452400 | 7.14498100 | -2.62707000 |
| H | -5.91470600 | 7.50135500 | -3.25351000 |
| C | -8.66202400 | 7.57033300 | -1.27578200 |
| H | -9.36754600 | 8.26247100 | -0.83012300 |
| C | -7.62440700 | 8.04592500 | -2.06916100 |
| H | -7.51804200 | 9.10881700 | -2.25147400 |
| C | -6.86224700 | 5.78258700 | -2.40411500 |
| C | -7.89714600 | 5.30552100 | -1.59737200 |
| H | -6.16840000 | 5.08134900 | -2.85251100 |
| N | -8.04263500 | 3.91822100 | -1.36560400 |
| C | -8.79634500 | 6.21102500 | -1.03182500 |
| C | -6.93230400 | 3.12633900 | -1.06428200 |
| C | -9.33634800 | 3.34887500 | -1.40390700 |
| H | -9.59839600 | 5.84311900 | -0.40301900 |
| C | -6.87670000 | 1.78896200 | -1.47890900 |

|   |              |             |             |
|---|--------------|-------------|-------------|
| C | -5.84804600  | 3.64772000  | -0.34517900 |
| C | -10.21627400 | 3.67336700  | -2.43778600 |
| C | -9.75415700  | 2.47359000  | -0.39981800 |
| H | -7.68847000  | 1.37881600  | -2.06654600 |
| C | -5.79297400  | 0.99520000  | -1.15738100 |
| H | -5.87035100  | 4.67855900  | -0.01468100 |
| C | -4.75790700  | 2.85451400  | -0.04891400 |
| C | -11.49424500 | 3.13353000  | -2.46020000 |
| H | -9.89222800  | 4.35146500  | -3.21837000 |
| H | -9.07683400  | 2.22831900  | 0.40966500  |
| C | -11.02917300 | 1.92734700  | -0.43713900 |
| C | -4.71475900  | 1.50688400  | -0.42578400 |
| H | -5.77357300  | -0.02834100 | -1.50985400 |
| H | -3.92159900  | 3.27060100  | 0.49921600  |
| H | -12.16753400 | 3.39418900  | -3.26896300 |
| C | -11.90717200 | 2.25566000  | -1.46414300 |
| H | -11.34006800 | 1.25330100  | 0.35319400  |
| C | -3.50994100  | 0.71955300  | -0.12680400 |
| H | -12.90565900 | 1.83481100  | -1.48628900 |
| N | -2.38118300  | 1.38386100  | -0.13340400 |
| C | -3.50993500  | -0.71949700 | 0.12690700  |
| C | -1.21653800  | 0.71128100  | -0.02152700 |
| N | -2.38117700  | -1.38380600 | 0.13346200  |
| C | -4.71474700  | -1.50684400 | 0.42587200  |
| C | -1.21653600  | -0.71122400 | 0.02154600  |
| C | -0.00002800  | 1.41357700  | 0.00000000  |
| C | -5.79296100  | -0.99518900 | 1.15749100  |
| C | -4.75788700  | -2.85446400 | 0.04896700  |
| C | -0.00002600  | -1.41351900 | -0.00001700 |
| C | 1.21648300   | 0.71128200  | 0.02151800  |
| C | -0.00002900  | 2.83755000  | 0.00000900  |
| C | -6.87667700  | -1.78896900 | 1.47900800  |
| H | -5.77356500  | 0.02834100  | 1.50999400  |
| H | -3.92158000  | -3.27053000 | -0.49918000 |
| C | -5.84801700  | -3.64768800 | 0.34521900  |
| C | 1.21648400   | -0.71122200 | -0.02157300 |
| C | -0.00002500  | -2.83749200 | -0.00002700 |
| N | -0.00003000  | 3.99487600  | 0.00001700  |
| H | -7.68844500  | -1.37884700 | 2.06666400  |
| C | -6.93227200  | -3.12633600 | 1.06434500  |
| H | -5.87031500  | -4.67851900 | 0.01469500  |
| N | -0.00002300  | -3.99481800 | -0.00003400 |
| N | -8.04259300  | -3.91823800 | 1.36565700  |
| C | -9.33631300  | -3.34890800 | 1.40398400  |

|   |              |             |             |
|---|--------------|-------------|-------------|
| C | -7.89708400  | -5.30554000 | 1.59739400  |
| C | -9.75413700  | -2.47359800 | 0.39992200  |
| C | -10.21622900 | -3.67344000 | 2.43785800  |
| C | -8.79627500  | -6.21104400 | 1.03183300  |
| C | -6.86217400  | -5.78261000 | 2.40412000  |
| H | -9.07682200  | -2.22829500 | -0.40955700 |
| C | -11.02915900 | -1.92737000 | 0.43726800  |
| H | -9.89217100  | -4.35155700 | 3.21842000  |
| C | -11.49420600 | -3.13361800 | 2.46029500  |
| H | -9.59833500  | -5.84313500 | 0.40303900  |
| C | -8.66193400  | -7.57035600 | 1.27575900  |
| H | -6.16833400  | -5.08137300 | 2.85252700  |
| C | -6.72443100  | -7.14500700 | 2.62704500  |
| H | -11.34006600 | -1.25330500 | -0.35304400 |
| C | -11.90714900 | -2.25572400 | 1.46426700  |
| H | -12.16748700 | -3.39430900 | 3.26905400  |
| C | -7.62430500  | -8.04595100 | 2.06912200  |
| H | -9.36744900  | -8.26249300 | 0.83009000  |
| H | -5.91460400  | -7.50138300 | 3.25347200  |
| H | -12.90564100 | -1.83488700 | 1.48643100  |
| H | -7.51792500  | -9.10884500 | 2.25141000  |
| C | 6.72461700   | 7.14492100  | 2.62709300  |
| H | 5.91481600   | 7.50130500  | 3.25354900  |
| C | 8.66210300   | 7.57024700  | 1.27577600  |
| H | 9.36763300   | 8.26237400  | 0.83011400  |
| C | 7.62450900   | 8.04585300  | 2.06917800  |
| H | 7.51816900   | 9.10874400  | 2.25150200  |
| C | 6.86230800   | 5.78252600  | 2.40412100  |
| C | 7.89718300   | 5.30544700  | 1.59735700  |
| H | 6.16845400   | 5.08129900  | 2.85252200  |
| N | 8.04263900   | 3.91814700  | 1.36557100  |
| C | 8.79639200   | 6.21093800  | 1.03180400  |
| C | 6.93228500   | 3.12629000  | 1.06426600  |
| C | 9.33634000   | 3.34877100  | 1.40383900  |
| H | 9.59842600   | 5.84302200  | 0.40298000  |
| C | 6.87666700   | 1.78890900  | 1.47887800  |
| C | 5.84802400   | 3.64769800  | 0.34518800  |
| C | 10.21630300  | 3.67324000  | 2.43769400  |
| C | 9.75409700   | 2.47347100  | 0.39974000  |
| H | 7.68844200   | 1.37874300  | 2.06649400  |
| C | 5.79292700   | 0.99516700  | 1.15735300  |
| H | 5.87034100   | 4.67854000  | 0.01470200  |
| C | 4.75786800   | 2.85451200  | 0.04892900  |
| C | 11.49425900  | 3.13336600  | 2.46007400  |

|   |             |             |             |
|---|-------------|-------------|-------------|
| H | 9.89229700  | 4.35134800  | 3.21828500  |
| H | 9.07674500  | 2.22821600  | -0.40972300 |
| C | 11.02909900 | 1.92719100  | 0.43702900  |
| C | 4.71470800  | 1.50687700  | 0.42578000  |
| H | 5.77351800  | -0.02838000 | 1.50980800  |
| H | 3.92155900  | 3.27061800  | -0.49918500 |
| H | 12.16757700 | 3.39400800  | 3.26881800  |
| C | 11.90713500 | 2.25548200  | 1.46400800  |
| H | 11.33995200 | 1.25313300  | -0.35331000 |
| C | 3.50988600  | 0.71955600  | 0.12679200  |
| H | 12.90561000 | 1.83460400  | 1.48612900  |
| N | 2.38112800  | 1.38386400  | 0.13340200  |
| C | 3.50988200  | -0.71949000 | -0.12693300 |
| N | 2.38112600  | -1.38380200 | -0.13349500 |
| C | 4.71470200  | -1.50682700 | -0.42589200 |
| C | 5.79292200  | -0.99515000 | -1.15748700 |
| C | 4.75785300  | -2.85444900 | -0.04899600 |
| C | 6.87665500  | -1.78891200 | -1.47899000 |
| H | 5.77351900  | 0.02838300  | -1.50998000 |
| H | 3.92154200  | -3.27053100 | 0.49913300  |
| C | 5.84800200  | -3.64765400 | -0.34523200 |
| H | 7.68842900  | -1.37877300 | -2.06662500 |
| C | 6.93226400  | -3.12627900 | -1.06433200 |
| H | 5.87031100  | -4.67848600 | -0.01471200 |
| N | 8.04261000  | -3.91815600 | -1.36561600 |
| C | 9.33631500  | -3.34879200 | -1.40391200 |
| C | 7.89714100  | -5.30546200 | -1.59735600 |
| C | 9.75408800  | -2.47346600 | -0.39984300 |
| C | 10.21626700 | -3.67330000 | -2.43776400 |
| C | 8.79634700  | -6.21094300 | -1.03178100 |
| C | 6.86225500  | -5.78256000 | -2.40409700 |
| H | 9.07674500  | -2.22818100 | 0.40961800  |
| C | 11.02909400 | -1.92719800 | -0.43715900 |
| H | 9.89224800  | -4.35142900 | -3.21833300 |
| C | 11.49422700 | -3.13343800 | -2.46017200 |
| H | 9.59838800  | -5.84301200 | -0.40297500 |
| C | 8.66204500  | -7.57025800 | -1.27570900 |
| H | 6.16840300  | -5.08134100 | -2.85251500 |
| C | 6.72455200  | -7.14496100 | -2.62702400 |
| H | 11.33995900 | -1.25311800 | 0.35315700  |
| C | 11.90711800 | -2.25552700 | -1.46413600 |
| H | 12.16753600 | -3.39411000 | -3.26891300 |
| C | 7.62444200  | -8.04588100 | -2.06908700 |
| H | 9.36757300  | -8.26237600 | -0.83002900 |

|   |             |             |             |
|---|-------------|-------------|-------------|
| H | 5.91474400  | -7.50135800 | -3.25346300 |
| H | 12.90559700 | -1.83465900 | -1.48627700 |
| H | 7.51809200  | -9.10877800 | -2.25137600 |

Cartesian coordinates of S<sub>0</sub> state of optimized CNQ-f-TPA in crystal:

|       |              |              |               |
|-------|--------------|--------------|---------------|
| C-C_R | -9.92631700  | -23.64804800 | -6.54387600 L |
| H-H_  | -10.20155300 | -22.63636900 | -6.82185500 L |
| C-C_R | -10.53676800 | -25.85094500 | -5.80831300 L |
| H-H_  | -11.28793500 | -26.56510000 | -5.49420600 L |
| C-C_R | -10.90597100 | -24.55624600 | -6.15539900 L |
| H-H_  | -11.94701000 | -24.25699600 | -6.12285100 L |
| C-C_R | -8.59414300  | -24.02599400 | -6.59366100 L |
| C-C_R | -8.22084100  | -25.32648100 | -6.23679200 L |
| H-H_  | -7.83591400  | -23.32046000 | -6.90867100 L |
| N-N_R | -6.86701600  | -25.71262400 | -6.27708800 L |
| C-C_R | -9.20505500  | -26.23483800 | -5.84036600 L |
| C-C_R | -5.86822000  | -24.82176600 | -5.84926500 L |
| C-C_R | -6.51433900  | -26.99532100 | -6.73358800 L |
| H-H_  | -8.91676900  | -27.23949300 | -5.55174000 L |
| C-C_R | -4.65011800  | -24.74229800 | -6.53477100 L |
| C-C_R | -6.07398300  | -23.99557600 | -4.73919400 L |
| C-C_R | -7.16675100  | -27.56002600 | -7.83554100 L |
| C-C_R | -5.50869600  | -27.72356400 | -6.09003400 L |
| H-H_  | -4.50017600  | -25.34547300 | -7.42177900 L |
| C-C_R | -3.65878200  | -23.88444700 | -6.10157500 L |
| H-H_  | -7.01399900  | -24.04425300 | -4.20277400 L |
| C-C_R | -5.08247600  | -23.12660000 | -4.32228200 L |
| C-C_R | -6.82056200  | -28.82874000 | -8.27359000 L |
| H-H_  | -7.93842600  | -26.99460800 | -8.34286000 L |
| H-H_  | -5.00827500  | -27.29214700 | -5.23118200 L |
| C-C_R | -5.16353000  | -28.98588200 | -6.54288400 L |
| C-C_R | -3.84588900  | -23.07332100 | -4.97531600 L |
| H-H_  | -2.73429600  | -23.82031200 | -6.66118600 L |
| H-H_  | -5.24851900  | -22.47396700 | -3.47522000 L |
| H-H_  | -7.33242600  | -29.25244500 | -9.13054900 L |
| C-C_R | -5.81683500  | -29.54875300 | -7.63499700 L |
| H-H_  | -4.38520900  | -29.53846100 | -6.02973300 L |
| C-C_R | -2.82785200  | -22.11344000 | -4.51217200 L |
| H-H_  | -5.55017100  | -30.53970300 | -7.98225000 L |
| N-N_R | -3.31386000  | -20.97583800 | -4.03442900 L |
| C-C_R | -1.42027500  | -22.31643100 | -4.59595500 L |
| C-C_R | -2.47233500  | -19.98129100 | -3.73349400 L |

|       |             |              |               |
|-------|-------------|--------------|---------------|
| N-N_R | -0.58389000 | -21.30745600 | -4.39329200 L |
| C-C_R | -0.77141300 | -23.61539900 | -4.85192000 L |
| C-C_R | -1.06918000 | -20.12543400 | -4.00180700 L |
| C-C_R | -2.96505800 | -18.77768700 | -3.17751000 L |
| C-C_R | -1.28805300 | -24.82372700 | -4.36689800 L |
| C-C_R | 0.45135600  | -23.64654500 | -5.53244000 L |
| C-C_R | -0.19924500 | -19.02394800 | -3.82635000 L |
| C-C_R | -2.08410100 | -17.69605900 | -2.94329000 L |
| C-C_R | -4.34017200 | -18.65547600 | -2.85480300 L |
| C-C_R | -0.63176200 | -26.01877700 | -4.58556600 L |
| H-H_  | -2.20154400 | -24.82086100 | -3.78504000 L |
| H-H_  | 0.87694100  | -22.71175500 | -5.87566100 L |
| C-C_R | 1.10561000  | -24.84067900 | -5.77138100 L |
| C-C_R | -0.70445000 | -17.80014300 | -3.32719200 L |
| C-C_R | 1.17520600  | -19.14528800 | -4.14816200 L |
| N-N_R | -5.46518800 | -18.55599600 | -2.59062200 L |
| H-H_  | -1.03272400 | -26.94116000 | -4.18368600 L |
| C-C_R | 0.56720100  | -26.04618800 | -5.30633900 L |
| H-H_  | 2.03617600  | -24.84792200 | -6.32516400 L |
| N-N_R | 2.30085900  | -19.24553300 | -4.41224500 L |
| N-N_R | 1.22216600  | -27.26502400 | -5.54863900 L |
| C-C_R | 0.47220400  | -28.41390500 | -5.86279800 L |
| C-C_R | 2.62803700  | -27.33702800 | -5.48860800 L |
| C-C_R | -0.63825000 | -28.32266400 | -6.70910300 L |
| C-C_R | 0.82891800  | -29.65946400 | -5.33821200 L |
| C-C_R | 3.33740300  | -28.10200300 | -6.41825300 L |
| C-C_R | 3.32772900  | -26.64000500 | -4.49828100 L |
| H-H_  | -0.91160700 | -27.36002000 | -7.12562800 L |
| C-C_R | -1.37479300 | -29.45427600 | -7.01672700 L |
| H-H_  | 1.68179000  | -29.73264100 | -4.67453700 L |
| C-C_R | 0.09175000  | -30.78835200 | -5.66123700 L |
| H-H_  | 2.79942300  | -28.63252000 | -7.19395700 L |
| C-C_R | 4.72039100  | -28.17239200 | -6.34993000 L |
| H-H_  | 2.77923600  | -26.05234800 | -3.77178100 L |
| C-C_R | 4.71107100  | -26.70595500 | -4.44853700 L |
| H-H_  | -2.22925400 | -29.36641200 | -7.67799900 L |
| C-C_R | -1.01519100 | -30.69447500 | -6.49968700 L |
| H-H_  | 0.37751000  | -31.74707800 | -5.24380800 L |
| C-C_R | 5.41571900  | -27.47238300 | -5.36909100 L |
| H-H_  | 5.25857700  | -28.76507300 | -7.07917200 L |
| H-H_  | 5.23991500  | -26.15988100 | -3.67574900 L |
| H-H_  | -1.58790700 | -31.57961800 | -6.74712700 L |
| H-H_  | 6.49780700  | -27.52449300 | -5.32356000 L |
| C-C_R | -6.80352000 | -12.94746600 | 2.72126800 L  |

|       |             |              |               |
|-------|-------------|--------------|---------------|
| H-H_  | -7.09174800 | -13.90825900 | 3.13119000 L  |
| C-C_R | -7.29604900 | -10.64701800 | 2.24462500 L  |
| H-H_  | -7.97965300 | -9.80495500  | 2.26717400 L  |
| C-C_R | -7.68513100 | -11.87470500 | 2.76922100 L  |
| H-H_  | -8.66720400 | -11.99286700 | 3.21142800 L  |
| C-C_R | -5.54319700 | -12.79931200 | 2.16326700 L  |
| C-C_R | -5.15332800 | -11.56709400 | 1.62814200 L  |
| H-H_  | -4.85311500 | -13.63370000 | 2.13804700 L  |
| N-N_R | -3.87777900 | -11.41525400 | 1.05102000 L  |
| C-C_R | -6.04439800 | -10.49117000 | 1.67048100 L  |
| C-C_R | -3.33433100 | -12.44190100 | 0.26097800 L  |
| C-C_R | -3.15094500 | -10.22794300 | 1.25480500 L  |
| H-H_  | -5.75002400 | -9.53896700  | 1.24554400 L  |
| C-C_R | -1.97220100 | -12.75174300 | 0.34246900 L  |
| C-C_R | -4.14417300 | -13.17889200 | -0.61117200 L |
| C-C_R | -3.14459400 | -9.60676300  | 2.50810800 L  |
| C-C_R | -2.42626500 | -9.65421900  | 0.20659000 L  |
| H-H_  | -1.34604400 | -12.21712600 | 1.04655500 L  |
| C-C_R | -1.43201800 | -13.74469300 | -0.44927200 L |
| H-H_  | -5.20114300 | -12.95284100 | -0.67780200 L |
| C-C_R | -3.59927600 | -14.18422300 | -1.38737400 L |
| C-C_R | -2.43474200 | -8.43127200  | 2.69965000 L  |
| H-H_  | -3.69673900 | -10.05328200 | 3.32572600 L  |
| H-H_  | -2.43551600 | -10.12784400 | -0.76687700 L |
| C-C_R | -1.71034600 | -8.48508500  | 0.41104500 L  |
| C-C_R | -2.22918800 | -14.46900400 | -1.34560200 L |
| H-H_  | -0.38096800 | -13.98482300 | -0.35210200 L |
| H-H_  | -4.22914000 | -14.76607500 | -2.04823800 L |
| H-H_  | -2.43749100 | -7.96330100  | 3.67643500 L  |
| C-C_R | -1.71080200 | -7.86422700  | 1.65515300 L  |
| H-H_  | -1.15762500 | -8.05085900  | -0.41428900 L |
| C-C_R | -1.69664400 | -15.56695100 | -2.17151100 L |
| H-H_  | -1.15747800 | -6.94687800  | 1.81109600 L  |
| N-N_R | -2.52670500 | -16.58738100 | -2.34158900 L |
| C-C_R | -0.38529500 | -15.60610600 | -2.72614500 L |
| N-N_R | 0.09454700  | -16.73096100 | -3.23761400 L |
| C-C_R | 0.51722000  | -14.44467500 | -2.83398800 L |
| C-C_R | 0.04955800  | -13.14942400 | -3.08808700 L |
| C-C_R | 1.90112500  | -14.64503100 | -2.76472900 L |
| C-C_R | 0.92544800  | -12.09034500 | -3.22885900 L |
| H-H_  | -1.01238000 | -12.97478900 | -3.20665700 L |
| H-H_  | 2.27083600  | -15.64994300 | -2.60879900 L |
| C-C_R | 2.78253200  | -13.58799600 | -2.88602400 L |
| H-H_  | 0.54829200  | -11.09861900 | -3.44895900 L |



|       |              |              |               |
|-------|--------------|--------------|---------------|
| C-C_R | 2.30406100   | -12.29175900 | -3.11334200 L |
| H-H_  | 3.84828800   | -13.75725300 | -2.80113600 L |
| N-N_R | 3.19261500   | -11.21024000 | -3.23306400 L |
| C-C_R | 2.86301500   | -9.96575800  | -2.66420300 L |
| C-C_R | 4.41749900   | -11.37256100 | -3.90946900 L |
| C-C_R | 2.24314500   | -9.90248100  | -1.41323600 L |
| C-C_R | 3.15305000   | -8.77765300  | -3.34202700 L |
| C-C_R | 5.58216800   | -10.77373100 | -3.41978000 L |
| C-C_R | 4.48113600   | -12.13655900 | -5.07919300 L |
| H-H_  | 2.02405800   | -10.82138900 | -0.88229300 L |
| C-C_R | 1.91807300   | -8.67541300  | -0.85647000 L |
| H-H_  | 3.62490100   | -8.82133900  | -4.31619700 L |
| C-C_R | 2.83489500   | -7.55469300  | -2.77055500 L |
| H-H_  | 5.53889700   | -10.19089000 | -2.50771500 L |
| C-C_R | 6.78164100   | -10.93342300 | -4.09410400 L |
| H-H_  | 3.57850300   | -12.59510500 | -5.46556200 L |
| C-C_R | 5.68952100   | -12.30103700 | -5.73667400 L |
| H-H_  | 1.44210400   | -8.64558000  | 0.11807900 L  |
| C-C_R | 2.21432800   | -7.49430800  | -1.52734400 L |
| H-H_  | 3.06364100   | -6.64173900  | -3.30865800 L |
| C-C_R | 6.84475700   | -11.69915200 | -5.25359400 L |
| H-H_  | 7.67833300   | -10.46714200 | -3.70067200 L |
| H-H_  | 5.72350400   | -12.89723300 | -6.64150400 L |
| H-H_  | 1.96687200   | -6.53674900  | -1.08645800 L |
| H-H_  | 7.78716200   | -11.82814900 | -5.77283700 L |
| C-C_R | -8.94874200  | -24.44319600 | -1.46395200 L |
| H-H_  | -9.22397800  | -23.43151700 | -1.74193100 L |
| C-C_R | -9.55916700  | -26.64620000 | -0.72938300 L |
| H-H_  | -10.31036000 | -27.36024800 | -0.41428100 L |
| C-C_R | -9.92839700  | -25.35139400 | -1.07547400 L |
| H-H_  | -10.96943500 | -25.05214500 | -1.04292600 L |
| C-C_R | -7.61656800  | -24.82114300 | -1.51373700 L |
| C-C_R | -7.24326600  | -26.12162900 | -1.15686800 L |
| H-H_  | -6.85770200  | -24.11637200 | -1.82864800 L |
| N-N_R | -5.88944100  | -26.50777200 | -1.19716400 L |
| C-C_R | -8.22684300  | -27.03075100 | -0.76034300 L |
| C-C_R | -4.89000800  | -25.61767800 | -0.76924200 L |
| C-C_R | -5.53610200  | -27.79134000 | -1.65455800 L |
| H-H_  | -7.93919500  | -28.03464100 | -0.47181600 L |
| C-C_R | -3.67254400  | -25.53744700 | -1.45484700 L |
| C-C_R | -5.09640800  | -24.79072400 | 0.34073000 L  |
| C-C_R | -6.18917600  | -28.35517400 | -2.75561700 L |
| C-C_R | -4.53112200  | -28.51871200 | -1.01011000 L |
| H-H_  | -3.52196300  | -26.14138500 | -2.34175600 L |

|       |             |              |               |
|-------|-------------|--------------|---------------|
| C-C_R | -2.68120800 | -24.67959600 | -1.02165000 L |
| H-H_  | -6.03578700 | -24.84016600 | 0.87724900 L  |
| C-C_R | -4.10426400 | -23.92251200 | 0.75774100 L  |
| C-C_R | -5.84298700 | -29.62388800 | -3.19366600 L |
| H-H_  | -6.96085100 | -27.78975600 | -3.26293600 L |
| H-H_  | -4.03070000 | -28.08729500 | -0.15125800 L |
| C-C_R | -4.18531800 | -29.78179500 | -1.46286100 L |
| C-C_R | -2.86767700 | -23.86923400 | 0.10470700 L  |
| H-H_  | -1.75608400 | -24.61622400 | -1.58116300 L |
| H-H_  | -4.27094400 | -23.26911600 | 1.60470400 L  |
| H-H_  | -6.35485200 | -30.04759400 | -4.05062400 L |
| C-C_R | -4.83926000 | -30.34390100 | -2.55507200 L |
| H-H_  | -3.40763400 | -30.33361000 | -0.94980900 L |
| C-C_R | -1.85027700 | -22.90858800 | 0.56775200 L  |
| H-H_  | -4.57259600 | -31.33485200 | -2.90232600 L |
| N-N_R | -2.33628500 | -21.77098600 | 1.04549500 L  |
| C-C_R | -0.44267500 | -23.11168600 | 0.48297500 L  |
| C-C_R | -1.49412300 | -20.77720400 | 1.34652900 L  |
| N-N_R | 0.39432200  | -22.10336800 | 0.68673100 L  |
| C-C_R | 0.20616200  | -24.41054700 | 0.22800500 L  |
| C-C_R | -0.09158000 | -20.92069000 | 1.07712300 L  |
| C-C_R | -1.98748300 | -19.57283500 | 1.90241400 L  |
| C-C_R | -0.31047900 | -25.61887500 | 0.71302600 L  |
| C-C_R | 1.42893100  | -24.44169300 | -0.45251500 L |
| C-C_R | 0.77832900  | -19.81909600 | 1.25357400 L  |
| C-C_R | -1.10588900 | -18.49197100 | 2.13673300 L  |
| C-C_R | -3.36259700 | -19.45062400 | 2.22512100 L  |
| C-C_R | 0.34581300  | -26.81392600 | 0.49435900 L  |
| H-H_  | -1.22396900 | -25.61601000 | 1.29488500 L  |
| H-H_  | 1.85451600  | -23.50690400 | -0.79573600 L |
| C-C_R | 2.08318500  | -25.63582700 | -0.69145600 L |
| C-C_R | 0.27312500  | -18.59529200 | 1.75273300 L  |
| C-C_R | 2.15341800  | -19.94120100 | 0.93186100 L  |
| N-N_R | -4.48761300 | -19.35114400 | 2.48930300 L  |
| H-H_  | -0.05451200 | -27.73707200 | 0.89633700 L  |
| C-C_R | 1.54541300  | -26.84210100 | -0.22631600 L |
| H-H_  | 3.01438900  | -25.64383500 | -1.24514100 L |
| N-N_R | 3.27843400  | -20.04068100 | 0.66768000 L  |
| N-N_R | 2.19974100  | -28.06017300 | -0.46871400 L |
| C-C_R | 1.44977900  | -29.20905400 | -0.78287300 L |
| C-C_R | 3.60561100  | -28.13217600 | -0.40868400 L |
| C-C_R | 0.33932500  | -29.11781200 | -1.62917900 L |
| C-C_R | 1.80649300  | -30.45461200 | -0.25828800 L |
| C-C_R | 4.31497800  | -28.89715100 | -1.33832800 L |

|       |             |              |               |
|-------|-------------|--------------|---------------|
| C-C_R | 4.30530400  | -27.43515300 | 0.58164300 L  |
| H-H_  | 0.06660500  | -28.15593300 | -2.04560500 L |
| C-C_R | -0.39655500 | -30.25029600 | -1.93769800 L |
| H-H_  | 2.65936400  | -30.52778900 | 0.40538700 L  |
| C-C_R | 1.06932400  | -31.58350000 | -0.58131200 L |
| H-H_  | 3.77699700  | -29.42766800 | -2.11403200 L |
| C-C_R | 5.69796600  | -28.96754000 | -1.27000500 L |
| H-H_  | 3.75744800  | -26.84826100 | 1.30824200 L  |
| C-C_R | 5.68864600  | -27.50110300 | 0.63138700 L  |
| H-H_  | -1.25167900 | -30.16156100 | -2.59807500 L |
| C-C_R | -0.03697900 | -31.49038700 | -1.41966400 L |
| H-H_  | 1.35508500  | -32.54222600 | -0.16388400 L |
| C-C_R | 6.39393100  | -28.26829500 | -0.28906800 L |
| H-H_  | 6.23615100  | -29.56022100 | -1.99924800 L |
| H-H_  | 6.21749000  | -26.95502900 | 1.40417500 L  |
| H-H_  | -0.61033200 | -32.37476700 | -1.66720300 L |
| H-H_  | 7.47538200  | -28.31964200 | -0.24363500 L |
| C-C_R | -5.82530800 | -13.74337900 | 7.80129100 L  |
| H-H_  | -6.11353600 | -14.70417200 | 8.21121300 L  |
| C-C_R | -6.31847400 | -11.44216700 | 7.32454900 L  |
| H-H_  | -7.00144100 | -10.60086800 | 7.34719700 L  |
| C-C_R | -6.70755600 | -12.66985300 | 7.84914500 L  |
| H-H_  | -7.68962900 | -12.78801600 | 8.29135200 L  |
| C-C_R | -4.56562200 | -13.59446000 | 7.24319100 L  |
| C-C_R | -4.17511500 | -12.36300700 | 6.70816500 L  |
| H-H_  | -3.87490300 | -14.42961300 | 7.21807000 L  |
| N-N_R | -2.89956700 | -12.21116600 | 6.13104300 L  |
| C-C_R | -5.06682300 | -11.28631800 | 6.75040500 L  |
| C-C_R | -2.35611900 | -13.23781300 | 5.34100100 L  |
| C-C_R | -2.17273300 | -11.02385600 | 6.33482800 L  |
| H-H_  | -4.77244900 | -10.33411500 | 6.32546800 L  |
| C-C_R | -0.99462600 | -13.54689100 | 5.42239400 L  |
| C-C_R | -3.16659900 | -13.97404000 | 4.46875200 L  |
| C-C_R | -2.16701900 | -10.40191200 | 7.58803300 L  |
| C-C_R | -1.44869000 | -10.44936700 | 5.28651400 L  |
| H-H_  | -0.36847000 | -13.01227400 | 6.12648000 L  |
| C-C_R | -0.45378000 | -14.54071300 | 4.62975700 L  |
| H-H_  | -4.22354300 | -13.74809700 | 4.40112900 L  |
| C-C_R | -2.62170100 | -14.97937200 | 3.69255000 L  |
| C-C_R | -1.45653000 | -9.22718400  | 7.77967300 L  |
| H-H_  | -2.71916400 | -10.84843000 | 8.40565000 L  |
| H-H_  | -1.45791600 | -10.92309900 | 4.31205300 L  |
| C-C_R | -0.73210900 | -9.28110500  | 5.49007400 L  |
| C-C_R | -1.25161300 | -15.26415200 | 3.73432200 L  |

|       |             |              |               |
|-------|-------------|--------------|---------------|
| H-H_  | 0.59663200  | -14.78007800 | 4.72682800 L  |
| H-H_  | -3.25153900 | -15.56133100 | 3.03069200 L  |
| H-H_  | -1.45989000 | -8.75855600  | 8.75536600 L  |
| C-C_R | -0.73322700 | -8.65937500  | 6.73507700 L  |
| H-H_  | -0.18002500 | -8.84611500  | 4.66464100 L  |
| C-C_R | -0.71843100 | -16.36286300 | 2.90851200 L  |
| H-H_  | -0.17987800 | -7.74213400  | 6.89002600 L  |
| N-N_R | -1.54849200 | -17.38329300 | 2.73843400 L  |
| C-C_R | 0.59228000  | -16.40125500 | 2.35378000 L  |
| N-N_R | 1.07212100  | -17.52610900 | 1.84231000 L  |
| C-C_R | 1.49479500  | -15.23982400 | 2.24593600 L  |
| C-C_R | 1.02713300  | -13.94457300 | 1.99183800 L  |
| C-C_R | 2.87870000  | -15.44017900 | 2.31519500 L  |
| C-C_R | 1.90302300  | -12.88549300 | 1.85106500 L  |
| H-H_  | -0.03416800 | -13.77070100 | 1.87336600 L  |
| H-H_  | 3.24904800  | -16.44585600 | 2.47122400 L  |
| C-C_R | 3.76010700  | -14.38314400 | 2.19390100 L  |
| H-H_  | 1.52586600  | -11.89376800 | 1.63096600 L  |
| C-C_R | 3.28227300  | -13.08767200 | 1.96668100 L  |
| H-H_  | 4.82650000  | -14.55316600 | 2.27888700 L  |
| N-N_R | 4.17018900  | -12.00538900 | 1.84686100 L  |
| C-C_R | 3.84058900  | -10.76090700 | 2.41572100 L  |
| C-C_R | 5.39509900  | -12.16781600 | 1.16946100 L  |
| C-C_R | 3.22072000  | -10.69763000 | 3.66668800 L  |
| C-C_R | 4.13062400  | -9.57280200  | 1.73789700 L  |
| C-C_R | 6.55974300  | -11.56888000 | 1.66014400 L  |
| C-C_R | 5.45871100  | -12.93170700 | 0.00073200 L  |
| H-H_  | 3.00227000  | -11.61730200 | 4.19773000 L  |
| C-C_R | 2.89628500  | -9.47132500  | 4.22355300 L  |
| H-H_  | 4.60311300  | -9.61725200  | 0.76382600 L  |
| C-C_R | 3.81247000  | -8.34984100  | 2.30936900 L  |
| H-H_  | 6.51647100  | -10.98603900 | 2.57220900 L  |
| C-C_R | 7.75985300  | -11.72933500 | 0.98591900 L  |
| H-H_  | 4.55607800  | -13.39025400 | -0.38563800 L |
| C-C_R | 6.66773300  | -13.09694900 | -0.65665100 L |
| H-H_  | 2.42031600  | -9.44149300  | 5.19810200 L  |
| C-C_R | 3.19192800  | -8.28956300  | 3.55158700 L  |
| H-H_  | 4.04124200  | -7.43699500  | 1.77027300 L  |
| C-C_R | 7.82296900  | -12.49506400 | -0.17357100 L |
| H-H_  | 8.65654500  | -11.26305500 | 1.37935200 L  |
| H-H_  | 6.70107900  | -13.69238100 | -1.56157900 L |
| H-H_  | 2.94444700  | -7.33189800  | 3.99346700 L  |
| H-H_  | 8.76537400  | -12.62406100 | -0.69281400 L |
| C-C_R | -7.97114200 | -25.23845200 | 3.61497900 L  |

|       |             |              |              |
|-------|-------------|--------------|--------------|
| H-H_  | -8.24640300 | -24.22666500 | 3.33799400 L |
| C-C_R | -8.58159300 | -27.44134900 | 4.35054200 L |
| H-H_  | -9.33278500 | -28.15539700 | 4.66564300 L |
| C-C_R | -8.95018500 | -26.14730700 | 4.00454900 L |
| H-H_  | -9.99186100 | -25.84729300 | 4.03699800 L |
| C-C_R | -6.63899400 | -25.61629100 | 3.56618800 L |
| C-C_R | -6.26569200 | -26.91677700 | 3.92305700 L |
| H-H_  | -5.88012700 | -24.91152100 | 3.25127600 L |
| N-N_R | -4.91186600 | -27.30292000 | 3.88276000 L |
| C-C_R | -7.24926900 | -27.82589900 | 4.31958200 L |
| C-C_R | -3.91243300 | -26.41282700 | 4.31068200 L |
| C-C_R | -4.55852700 | -28.58648900 | 3.42536600 L |
| H-H_  | -6.96162000 | -28.82979000 | 4.60810900 L |
| C-C_R | -2.69496900 | -26.33259500 | 3.62507800 L |
| C-C_R | -4.11883400 | -25.58587300 | 5.42065500 L |
| C-C_R | -5.21160200 | -29.15032200 | 2.32430800 L |
| C-C_R | -3.55354700 | -29.31386100 | 4.06981500 L |
| H-H_  | -2.54438900 | -26.93653400 | 2.73816800 L |
| C-C_R | -1.70297000 | -25.47561500 | 4.05737900 L |
| H-H_  | -5.05821300 | -25.63531400 | 5.95717300 L |
| C-C_R | -3.12668900 | -24.71766100 | 5.83766500 L |
| C-C_R | -4.86477500 | -30.41980100 | 1.88635700 L |
| H-H_  | -5.98263900 | -28.58566900 | 1.81708700 L |
| H-H_  | -3.05248800 | -28.88320800 | 4.92876500 L |
| C-C_R | -3.20774300 | -30.57694300 | 3.61706400 L |
| C-C_R | -1.89010300 | -24.66438200 | 5.18463200 L |
| H-H_  | -0.77848300 | -25.41148000 | 3.49776700 L |
| H-H_  | -3.29273200 | -24.06502800 | 6.68472700 L |
| H-H_  | -5.37727700 | -30.84274200 | 1.02930000 L |
| C-C_R | -3.86104800 | -31.13981400 | 2.52495100 L |
| H-H_  | -2.42942200 | -31.12952200 | 4.13021500 L |
| C-C_R | -0.87206500 | -23.70450100 | 5.64777500 L |
| H-H_  | -3.59438400 | -32.13076400 | 2.17769700 L |
| N-N_R | -1.35807300 | -22.56689900 | 6.12551800 L |
| C-C_R | 0.53490000  | -23.90683500 | 5.56290000 L |
| C-C_R | -0.51654800 | -21.57235200 | 6.42645300 L |
| N-N_R | 1.37189700  | -22.89851700 | 5.76665500 L |
| C-C_R | 1.18373700  | -25.20569500 | 5.30792900 L |
| C-C_R | 0.88599500  | -21.71583800 | 6.15704800 L |
| C-C_R | -1.00990900 | -20.36798400 | 6.98233800 L |
| C-C_R | 0.66709600  | -26.41402300 | 5.79295100 L |
| C-C_R | 2.40714300  | -25.23760600 | 4.62750800 L |
| C-C_R | 1.75590400  | -20.61424500 | 6.33349900 L |
| C-C_R | -0.12828800 | -19.28722700 | 7.21566400 L |

|       |             |              |               |
|-------|-------------|--------------|---------------|
| C-C_R | -2.38438500 | -20.24653700 | 7.30514400 L  |
| C-C_R | 1.32338800  | -27.60907400 | 5.57428300 L  |
| H-H_  | -0.24639500 | -26.41115800 | 6.37480900 L  |
| H-H_  | 2.83272800  | -24.30281600 | 4.28428700 L  |
| C-C_R | 3.06139700  | -26.43174000 | 4.38856700 L  |
| C-C_R | 1.25069900  | -19.39044000 | 6.83265700 L  |
| C-C_R | 3.13101800  | -20.73645600 | 6.01079200 L  |
| N-N_R | -3.51003900 | -20.14629200 | 7.56922700 L  |
| H-H_  | 0.92306300  | -28.53222100 | 5.97626100 L  |
| C-C_R | 2.52298800  | -27.63724900 | 4.85360900 L  |
| H-H_  | 3.99196300  | -26.43898300 | 3.83478400 L  |
| N-N_R | 4.25600800  | -20.83582900 | 5.74760400 L  |
| N-N_R | 3.17795300  | -28.85608500 | 4.61130900 L  |
| C-C_R | 2.42735400  | -30.00420200 | 4.29705100 L  |
| C-C_R | 4.58318600  | -28.92732400 | 4.67124100 L  |
| C-C_R | 1.31753700  | -29.91372500 | 3.45084500 L  |
| C-C_R | 2.78470500  | -31.25052500 | 4.82173500 L  |
| C-C_R | 5.29255200  | -29.69229900 | 3.74159600 L  |
| C-C_R | 5.28287900  | -28.23030100 | 5.66156800 L  |
| H-H_  | 1.04418000  | -28.95108100 | 3.03431900 L  |
| C-C_R | 0.58102000  | -31.04544400 | 3.14222700 L  |
| H-H_  | 3.63757600  | -31.32370200 | 5.48541000 L  |
| C-C_R | 2.04692500  | -32.37875600 | 4.49761800 L  |
| H-H_  | 4.75457200  | -30.22281600 | 2.96589200 L  |
| C-C_R | 6.67617800  | -29.76345300 | 3.81001800 L  |
| H-H_  | 4.73502300  | -27.64340900 | 6.38816600 L  |
| C-C_R | 6.66685800  | -28.29701600 | 5.71141000 L  |
| H-H_  | -0.27346700 | -30.95747300 | 2.48194800 L  |
| C-C_R | 0.94059600  | -32.28553600 | 3.66026100 L  |
| H-H_  | 2.33329700  | -33.33813900 | 4.91613900 L  |
| C-C_R | 7.37150600  | -29.06344400 | 4.79085600 L  |
| H-H_  | 7.21436300  | -30.35613400 | 3.08077500 L  |
| H-H_  | 7.19570200  | -27.75094200 | 6.48419800 L  |
| H-H_  | 0.36788000  | -33.17067900 | 3.41282100 L  |
| H-H_  | 8.45295700  | -29.11479000 | 4.83628900 L  |
| C-C_R | -4.84773300 | -14.53852700 | 12.88121600 L |
| H-H_  | -5.13596100 | -15.49932000 | 13.29113700 L |
| C-C_R | -5.34089900 | -12.23731500 | 12.40447400 L |
| H-H_  | -6.02386600 | -11.39601600 | 12.42712100 L |
| C-C_R | -5.72998200 | -13.46500100 | 12.92907000 L |
| H-H_  | -6.71141700 | -13.58392800 | 13.37137500 L |
| C-C_R | -3.58741000 | -14.39037300 | 12.32321400 L |
| C-C_R | -3.19754100 | -13.15815500 | 11.78809000 L |
| H-H_  | -2.89732800 | -15.22476100 | 12.29799400 L |

|       |             |              |               |
|-------|-------------|--------------|---------------|
| N-N_R | -1.92199300 | -13.00631500 | 11.21096700 L |
| C-C_R | -4.08861100 | -12.08223100 | 11.83042800 L |
| C-C_R | -1.37854500 | -14.03296200 | 10.42092600 L |
| C-C_R | -1.19515800 | -11.81900400 | 11.41475300 L |
| H-H_  | -3.79487500 | -11.12926400 | 11.40539300 L |
| C-C_R | -0.01705200 | -14.34204000 | 10.50231800 L |
| C-C_R | -2.18902400 | -14.76918800 | 9.54867600 L  |
| C-C_R | -1.18944400 | -11.19706000 | 12.66795700 L |
| C-C_R | -0.47047800 | -11.24528000 | 10.36653800 L |
| H-H_  | 0.60974300  | -13.80818700 | 11.20650300 L |
| C-C_R | 0.52379500  | -15.33586100 | 9.70968100 L  |
| H-H_  | -3.24533100 | -14.54400900 | 9.48115200 L  |
| C-C_R | -1.64412600 | -15.77452000 | 8.77247500 L  |
| C-C_R | -0.47895500 | -10.02233300 | 12.85959700 L |
| H-H_  | -1.74095200 | -11.64434300 | 13.48567300 L |
| H-H_  | -0.47970400 | -11.71901200 | 9.39207600 L  |
| C-C_R | 0.24546600  | -10.07625300 | 10.56999900 L |
| C-C_R | -0.27403900 | -16.05930100 | 8.81424700 L  |
| H-H_  | 1.57484400  | -15.57599100 | 9.80685100 L  |
| H-H_  | -2.27332700 | -16.35724300 | 8.11071500 L  |
| H-H_  | -0.48167800 | -9.55446900  | 13.83538900 L |
| C-C_R | 0.24434800  | -9.45452400  | 11.81500200 L |
| H-H_  | 0.79755000  | -9.64126300  | 9.74456600 L  |
| C-C_R | 0.25914300  | -17.15801200 | 7.98843600 L  |
| H-H_  | 0.79769700  | -8.53728200  | 11.96995100 L |
| N-N_R | -0.57091800 | -18.17844200 | 7.81835800 L  |
| C-C_R | 1.57049200  | -17.19716700 | 7.43380300 L  |
| N-N_R | 2.04969600  | -18.32125800 | 6.92223500 L  |
| C-C_R | 2.47237000  | -16.03497200 | 7.32586100 L  |
| C-C_R | 2.00470700  | -14.73972100 | 7.07176200 L  |
| C-C_R | 3.85627500  | -16.23532800 | 7.39511900 L  |
| C-C_R | 2.88059800  | -13.68064100 | 6.93099000 L  |
| H-H_  | 0.94340700  | -14.56585000 | 6.95329100 L  |
| H-H_  | 4.22662300  | -17.24100400 | 7.55114900 L  |
| C-C_R | 4.73831900  | -15.17905700 | 7.27392400 L  |
| H-H_  | 2.50407800  | -12.68968000 | 6.71098900 L  |
| C-C_R | 4.25984800  | -13.88282000 | 7.04660600 L  |
| H-H_  | 5.80407500  | -15.34831400 | 7.35881100 L  |
| N-N_R | 5.14840100  | -12.80130100 | 6.92688400 L  |
| C-C_R | 4.81880100  | -11.55681900 | 7.49574400 L  |
| C-C_R | 6.37331100  | -12.96372900 | 6.24948400 L  |
| C-C_R | 4.19829500  | -11.49277800 | 8.74661300 L  |
| C-C_R | 5.10819900  | -10.36795000 | 6.81782100 L  |
| C-C_R | 7.53795500  | -12.36479200 | 6.74016700 L  |

|       |             |              |               |
|-------|-------------|--------------|---------------|
| C-C_R | 6.43692300  | -13.72762000 | 5.08075500 L  |
| H-H_  | 3.97984500  | -12.41245000 | 9.27765400 L  |
| C-C_R | 3.87386000  | -10.26647400 | 9.30347800 L  |
| H-H_  | 5.58068800  | -10.41240000 | 5.84375100 L  |
| C-C_R | 4.79068200  | -9.14575400  | 7.38939200 L  |
| H-H_  | 7.49468300  | -11.78195100 | 7.65223200 L  |
| C-C_R | 8.73745300  | -12.52459100 | 6.06484900 L  |
| H-H_  | 5.53429000  | -14.18616600 | 4.69438500 L  |
| C-C_R | 7.64530800  | -13.89209800 | 4.42327300 L  |
| H-H_  | 3.39791600  | -10.23674800 | 10.27703200 L |
| C-C_R | 4.17014000  | -9.08547600  | 8.63161000 L  |
| H-H_  | 5.01945400  | -8.23290700  | 6.85029600 L  |
| C-C_R | 8.80054400  | -13.29021300 | 4.90635300 L  |
| H-H_  | 9.63412000  | -12.05820300 | 6.45927600 L  |
| H-H_  | 7.67929100  | -14.48829400 | 3.51844400 L  |
| H-H_  | 3.92265900  | -8.12781000  | 9.07349000 L  |
| H-H_  | 9.74294900  | -13.41921000 | 4.38711100 L  |
| C-C_R | 10.86589600 | -6.47683000  | -7.85733600 L |
| H-H_  | 10.59066000 | -5.46515100  | -8.13531500 L |
| C-C_R | 10.25621500 | -8.67909100  | -7.12182100 L |
| H-H_  | 9.50427800  | -9.39388200  | -6.80766500 L |
| C-C_R | 9.88624100  | -7.38502800  | -7.46885800 L |
| H-H_  | 8.84597300  | -7.08514200  | -7.43635900 L |
| C-C_R | 12.19806900 | -6.85477700  | -7.90712100 L |
| C-C_R | 12.57137200 | -8.15526300  | -7.55025100 L |
| H-H_  | 12.95706900 | -6.14860600  | -8.22217900 L |
| N-N_R | 13.92596700 | -8.54077000  | -7.59059600 L |
| C-C_R | 11.58715700 | -9.06362000  | -7.15382500 L |
| C-C_R | 14.92399300 | -7.65054800  | -7.16272500 L |
| C-C_R | 14.27864300 | -9.82346700  | -8.04709600 L |
| H-H_  | 11.87544300 | -10.06827500 | -6.86520000 L |
| C-C_R | 16.14209400 | -7.57108000  | -7.84823100 L |
| C-C_R | 14.71900000 | -6.82372200  | -6.05270200 L |
| C-C_R | 13.62623100 | -10.38817200 | -9.14904900 L |
| C-C_R | 15.28351600 | -10.55234600 | -7.40349400 L |
| H-H_  | 16.29280700 | -8.17361900  | -8.73528800 L |
| C-C_R | 17.13343000 | -6.71323000  | -7.41503400 L |
| H-H_  | 13.77898300 | -6.87239900  | -5.51628300 L |
| C-C_R | 15.70973600 | -5.95538200  | -5.63574200 L |
| C-C_R | 13.97165100 | -11.65752200 | -9.58705000 L |
| H-H_  | 12.85378600 | -9.82339000  | -9.65632000 L |
| H-H_  | 15.78393800 | -10.12092900 | -6.54464200 L |
| C-C_R | 15.62868300 | -11.81466400 | -7.85634300 L |
| C-C_R | 16.94632300 | -5.90210300  | -6.28877500 L |



|       |             |              |                |
|-------|-------------|--------------|----------------|
| H-H_  | 18.05791700 | -6.64909400  | -7.97464600 L  |
| H-H_  | 15.54446400 | -5.30211300  | -4.78872900 L  |
| H-H_  | 13.46055600 | -12.08059100 | -10.44405700 L |
| C-C_R | 14.97537800 | -12.37753500 | -8.94845600 L  |
| H-H_  | 16.40777400 | -12.36660700 | -7.34324100 L  |
| C-C_R | 17.96513100 | -4.94158600  | -5.82568000 L  |
| H-H_  | 15.24204200 | -13.36848500 | -9.29571000 L  |
| N-N_R | 17.47912300 | -3.80398400  | -5.34793700 L  |
| C-C_R | 19.37270800 | -5.14457700  | -5.90946300 L  |
| C-C_R | 18.32064800 | -2.80943700  | -5.04700200 L  |
| N-N_R | 20.20832300 | -4.13623800  | -5.70675200 L  |
| C-C_R | 20.02080000 | -6.44418100  | -6.16537900 L  |
| C-C_R | 19.72303200 | -2.95421600  | -5.31526700 L  |
| C-C_R | 17.82715400 | -1.60646900  | -4.49097000 L  |
| C-C_R | 19.50492900 | -7.65187300  | -5.68040600 L  |
| C-C_R | 21.24356900 | -6.47532700  | -6.84589900 L  |
| C-C_R | 20.59373700 | -1.85209400  | -5.13985800 L  |
| C-C_R | 18.70888200 | -0.52420500  | -4.25679800 L  |
| C-C_R | 16.45281000 | -1.48362200  | -4.16831100 L  |
| C-C_R | 20.16045100 | -8.84755900  | -5.89902500 L  |
| H-H_  | 18.59066900 | -7.64964300  | -5.09849900 L  |
| H-H_  | 21.66915300 | -5.54053700  | -7.18912000 L  |
| C-C_R | 21.89859300 | -7.66882500  | -7.08488900 L  |
| C-C_R | 20.08853300 | -0.62828900  | -4.64070000 L  |
| C-C_R | 21.96741800 | -1.97407000  | -5.46162100 L  |
| N-N_R | 15.32779500 | -1.38414200  | -3.90413000 L  |
| H-H_  | 19.76025900 | -9.76930600  | -5.49719500 L  |
| C-C_R | 21.36018400 | -8.87433400  | -6.61984700 L  |
| H-H_  | 22.82838900 | -7.67670400  | -7.63862300 L  |
| N-N_R | 23.09307100 | -2.07431500  | -5.72570400 L  |
| N-N_R | 22.01437800 | -10.09380600 | -6.86209800 L  |
| C-C_R | 21.26441700 | -11.24268700 | -7.17625700 L  |
| C-C_R | 23.42024900 | -10.16581000 | -6.80206800 L  |
| C-C_R | 20.15473300 | -11.15081000 | -8.02261100 L  |
| C-C_R | 21.62113100 | -12.48824600 | -6.65167200 L  |
| C-C_R | 24.13038600 | -10.93014900 | -7.73176100 L  |
| C-C_R | 24.11994200 | -9.46878700  | -5.81174100 L  |
| H-H_  | 19.88137500 | -10.18816600 | -8.43913600 L  |
| C-C_R | 19.41742000 | -12.28305800 | -8.33018600 L  |
| H-H_  | 22.47477200 | -12.56078700 | -5.98804500 L  |
| C-C_R | 20.88396200 | -13.61713400 | -6.97469600 L  |
| H-H_  | 23.59163500 | -11.46130200 | -8.50741600 L  |
| C-C_R | 25.51337300 | -11.00053800 | -7.66343800 L  |
| H-H_  | 23.57221900 | -8.88049400  | -5.08529000 L  |

|       |             |              |               |
|-------|-------------|--------------|---------------|
| C-C_R | 25.50405400 | -9.53410100  | -5.76204500 L |
| H-H_  | 18.56295900 | -12.19519400 | -8.99145900 L |
| C-C_R | 19.77702100 | -13.52325700 | -7.81314600 L |
| H-H_  | 21.17049300 | -14.57522400 | -6.55731600 L |
| C-C_R | 26.20793200 | -10.30116500 | -6.68255100 L |
| H-H_  | 26.05155900 | -11.59321900 | -8.39268000 L |
| H-H_  | 26.03289800 | -8.98802700  | -4.98925700 L |
| H-H_  | 19.20430600 | -14.40840000 | -8.06058600 L |
| H-H_  | 27.29002000 | -10.35327500 | -6.63701900 L |
| C-C_R | 13.98946300 | 4.22438800   | 1.40776000 L  |
| H-H_  | 13.70046500 | 3.26295900   | 1.81773000 L  |
| C-C_R | 13.49693400 | 6.52483600   | 0.93111700 L  |
| H-H_  | 12.81333000 | 7.36689900   | 0.95366500 L  |
| C-C_R | 13.10785200 | 5.29714900   | 1.45571300 L  |
| H-H_  | 12.12500800 | 5.17835100   | 1.89796800 L  |
| C-C_R | 15.24901600 | 4.37190600   | 0.84980700 L  |
| C-C_R | 15.63888500 | 5.60412400   | 0.31468300 L  |
| H-H_  | 15.93986800 | 3.53815400   | 0.82453800 L  |
| N-N_R | 16.91520300 | 5.75660000   | -0.26248800 L |
| C-C_R | 14.74781500 | 6.68004800   | 0.35702100 L  |
| C-C_R | 17.45788100 | 4.72931700   | -1.05248100 L |
| C-C_R | 17.64203700 | 6.94391100   | -0.05870300 L |
| H-H_  | 15.04218800 | 7.63225100   | -0.06791500 L |
| C-C_R | 18.82001100 | 4.41947500   | -0.97099000 L |
| C-C_R | 16.64803900 | 3.99232600   | -1.92463200 L |
| C-C_R | 17.64761900 | 7.56445500   | 1.19464900 L  |
| C-C_R | 18.36671800 | 7.51763500   | -1.10691800 L |
| H-H_  | 19.44616800 | 4.95409200   | -0.26690400 L |
| C-C_R | 19.36019500 | 3.42652500   | -1.76273200 L |
| H-H_  | 15.59184000 | 4.21901300   | -1.99131000 L |
| C-C_R | 17.19370700 | 2.98763100   | -2.70088200 L |
| C-C_R | 18.35824100 | 8.74058200   | 1.38614200 L  |
| H-H_  | 17.09547400 | 7.11793600   | 2.01226700 L  |
| H-H_  | 18.35669600 | 7.04337400   | -2.08033700 L |
| C-C_R | 19.08263600 | 8.68676900   | -0.90246300 L |
| C-C_R | 18.56379400 | 2.70285000   | -2.65911000 L |
| H-H_  | 20.41124400 | 3.18639500   | -1.66556200 L |
| H-H_  | 16.56384300 | 2.40577900   | -3.36174600 L |
| H-H_  | 18.35549200 | 9.20855300   | 2.36292700 L  |
| C-C_R | 19.08141100 | 9.30699100   | 0.34169300 L  |
| H-H_  | 19.63458700 | 9.12035800   | -1.72774900 L |
| C-C_R | 19.09556900 | 1.60426700   | -3.48497100 L |
| H-H_  | 19.63550500 | 10.22497600  | 0.49758800 L  |
| N-N_R | 18.26550800 | 0.58383700   | -3.65504900 L |

|       |             |              |               |
|-------|-------------|--------------|---------------|
| C-C_R | 20.40768800 | 1.56574800   | -4.03965300 L |
| N-N_R | 20.88675900 | 0.44025700   | -4.55107400 L |
| C-C_R | 21.30943300 | 2.72654300   | -4.14744700 L |
| C-C_R | 20.84254000 | 4.02243000   | -4.40159500 L |
| C-C_R | 22.69333800 | 2.52618700   | -4.07818900 L |
| C-C_R | 21.71766100 | 5.08087300   | -4.54231900 L |
| H-H_  | 19.77983200 | 4.19642900   | -4.52011600 L |
| H-H_  | 23.06304900 | 1.52127500   | -3.92225800 L |
| C-C_R | 23.57551400 | 3.58385800   | -4.19953200 L |
| H-H_  | 21.34127400 | 6.07323500   | -4.76246700 L |
| C-C_R | 23.09704300 | 4.88009500   | -4.42685000 L |
| H-H_  | 24.64127100 | 3.41460100   | -4.11464400 L |
| N-N_R | 23.98482700 | 5.96097800   | -4.54652300 L |
| C-C_R | 23.65599700 | 7.20609600   | -3.97771100 L |
| C-C_R | 25.20971200 | 5.79865700   | -5.22292900 L |
| C-C_R | 23.03535800 | 7.26873700   | -2.72669600 L |
| C-C_R | 23.94603200 | 8.39420100   | -4.65553600 L |
| C-C_R | 26.37438100 | 6.39748700   | -4.73324000 L |
| C-C_R | 25.27411900 | 5.03529500   | -6.39270100 L |
| H-H_  | 22.81704100 | 6.35046500   | -2.19580100 L |
| C-C_R | 22.71028500 | 8.49580500   | -2.16992900 L |
| H-H_  | 24.41711400 | 8.34987900   | -5.62965600 L |
| C-C_R | 23.62710800 | 9.61652500   | -4.08401500 L |
| H-H_  | 26.33110900 | 6.98032800   | -3.82117500 L |
| C-C_R | 27.57385300 | 6.23779500   | -5.40756400 L |
| H-H_  | 24.37071500 | 4.57611300   | -6.77902200 L |
| C-C_R | 26.48173400 | 4.87018100   | -7.05013400 L |
| H-H_  | 22.23431600 | 8.52563800   | -1.19538100 L |
| C-C_R | 23.00654000 | 9.67691000   | -2.84080300 L |
| H-H_  | 23.85662400 | 10.53011500  | -4.62216600 L |
| C-C_R | 27.63774000 | 5.47270200   | -6.56710200 L |
| H-H_  | 28.47054600 | 6.70407600   | -5.01413100 L |
| H-H_  | 26.51571600 | 4.27398500   | -7.95496300 L |
| H-H_  | 22.75908400 | 10.63446900  | -2.39991700 L |
| H-H_  | 28.57937500 | 5.34306900   | -7.08629600 L |
| C-C_R | 11.84347000 | -7.27197800  | -2.77741100 L |
| H-H_  | 11.56823400 | -6.26029900  | -3.05539000 L |
| C-C_R | 11.23381500 | -9.47434600  | -2.04289100 L |
| H-H_  | 10.48185300 | -10.18903000 | -1.72774100 L |
| C-C_R | 10.86381600 | -8.18017600  | -2.38893400 L |
| H-H_  | 9.82354700  | -7.88029100  | -2.35643500 L |
| C-C_R | 13.17564400 | -7.64992500  | -2.82719600 L |
| C-C_R | 13.54894600 | -8.95041100  | -2.47032700 L |
| H-H_  | 13.93528100 | -6.94451800  | -3.14215600 L |

|       |             |              |               |
|-------|-------------|--------------|---------------|
| N-N_R | 14.90354200 | -9.33591800  | -2.51067200 L |
| C-C_R | 12.56536900 | -9.85953300  | -2.07380200 L |
| C-C_R | 15.90220500 | -8.44646000  | -2.08270200 L |
| C-C_R | 15.25688100 | -10.61948600 | -2.96806700 L |
| H-H_  | 12.85301800 | -10.86342300 | -1.78527500 L |
| C-C_R | 17.11966900 | -8.36622900  | -2.76830600 L |
| C-C_R | 15.69657400 | -7.61887000  | -0.97277800 L |
| C-C_R | 14.60380600 | -11.18332000 | -4.06912500 L |
| C-C_R | 16.26109100 | -11.34749400 | -2.32356900 L |
| H-H_  | 17.27101900 | -8.96953100  | -3.65526500 L |
| C-C_R | 18.11100500 | -7.50837800  | -2.33511000 L |
| H-H_  | 14.75719500 | -7.66831200  | -0.43626000 L |
| C-C_R | 16.68794900 | -6.75129400  | -0.55571900 L |
| C-C_R | 14.94922500 | -12.45267000 | -4.50712600 L |
| H-H_  | 13.83136100 | -10.61853800 | -4.57639500 L |
| H-H_  | 16.76151200 | -10.91607700 | -1.46471700 L |
| C-C_R | 16.60689500 | -12.61057700 | -2.77632000 L |
| C-C_R | 17.92453500 | -6.69801600  | -1.20875200 L |
| H-H_  | 19.03612900 | -7.44500600  | -2.89462300 L |
| H-H_  | 16.52203800 | -6.09726200  | 0.29119600 L  |
| H-H_  | 14.43813100 | -12.87574000 | -5.36413200 L |
| C-C_R | 15.95295200 | -13.17268300 | -3.86853200 L |
| H-H_  | 17.38534800 | -13.16175600 | -2.26331700 L |
| C-C_R | 18.94270500 | -5.73673400  | -0.74575600 L |
| H-H_  | 16.21961600 | -14.16363400 | -4.21578500 L |
| N-N_R | 18.45669800 | -4.59913200  | -0.26801300 L |
| C-C_R | 20.35030800 | -5.93983200  | -0.83053300 L |
| C-C_R | 19.29886000 | -3.60535000  | 0.03302100 L  |
| N-N_R | 21.18653500 | -4.93215000  | -0.62672900 L |
| C-C_R | 20.99837500 | -7.23932900  | -1.08545500 L |
| C-C_R | 20.70063300 | -3.74947200  | -0.23633600 L |
| C-C_R | 18.80472900 | -2.40161700  | 0.58895500 L  |
| C-C_R | 20.48250400 | -8.44702100  | -0.60048200 L |
| C-C_R | 22.22114400 | -7.27047500  | -1.76597500 L |
| C-C_R | 21.57131200 | -2.64724200  | -0.05993400 L |
| C-C_R | 19.68709400 | -1.32011700  | 0.82322500 L  |
| C-C_R | 17.43038500 | -2.27877000  | 0.91161300 L  |
| C-C_R | 21.13802500 | -9.64270800  | -0.81910100 L |
| H-H_  | 19.56824300 | -8.44479200  | -0.01857500 L |
| H-H_  | 22.64672800 | -6.33568600  | -2.10919600 L |
| C-C_R | 22.87616700 | -8.46397300  | -2.00496400 L |
| C-C_R | 21.06610700 | -1.42343800  | 0.43922400 L  |
| C-C_R | 22.94563000 | -2.76998300  | -0.38159800 L |
| N-N_R | 16.30536900 | -2.17929000  | 1.17579500 L  |

|       |             |              |               |
|-------|-------------|--------------|---------------|
| H-H_  | 20.73847100 | -10.56521800 | -0.41717200 L |
| C-C_R | 22.33839600 | -9.67024700  | -1.53982400 L |
| H-H_  | 23.80660100 | -8.47261700  | -2.55860000 L |
| N-N_R | 24.07064600 | -2.86946300  | -0.64578000 L |
| N-N_R | 22.99195300 | -10.88895500 | -1.78217400 L |
| C-C_R | 22.24199200 | -12.03783600 | -2.09633300 L |
| C-C_R | 24.39782400 | -10.96095800 | -1.72214300 L |
| C-C_R | 21.13230800 | -11.94595800 | -2.94268700 L |
| C-C_R | 22.59870500 | -13.28339400 | -1.57174700 L |
| C-C_R | 25.10796000 | -11.72529700 | -2.65183600 L |
| C-C_R | 25.09751600 | -10.26393500 | -0.73181600 L |
| H-H_  | 20.85958800 | -10.98407900 | -3.35911300 L |
| C-C_R | 20.39565800 | -13.07907800 | -3.25115700 L |
| H-H_  | 23.45234700 | -13.35593500 | -0.90812100 L |
| C-C_R | 21.86153700 | -14.41228200 | -1.89477200 L |
| H-H_  | 24.56921000 | -12.25645000 | -3.42749200 L |
| C-C_R | 26.49094800 | -11.79568600 | -2.58351300 L |
| H-H_  | 24.55043100 | -9.67640700  | -0.00526700 L |
| C-C_R | 26.48162800 | -10.32924900 | -0.68212100 L |
| H-H_  | 19.54053300 | -12.99034300 | -3.91153400 L |
| C-C_R | 20.75523300 | -14.31916900 | -2.73312300 L |
| H-H_  | 22.14806700 | -15.37037200 | -1.47739200 L |
| C-C_R | 27.18614400 | -11.09707700 | -1.60252800 L |
| H-H_  | 27.02913400 | -12.38836700 | -3.31275600 L |
| H-H_  | 27.01047200 | -9.78317500  | 0.09066700 L  |
| H-H_  | 20.18188000 | -15.20354900 | -2.98066200 L |
| H-H_  | 28.26759500 | -11.14842400 | -1.55709500 L |
| C-C_R | 14.96767500 | 3.42847500   | 6.48778300 L  |
| H-H_  | 14.67867700 | 2.46704600   | 6.89775300 L  |
| C-C_R | 14.47450900 | 5.72968700   | 6.01104100 L  |
| H-H_  | 13.79154200 | 6.57098600   | 6.03368800 L  |
| C-C_R | 14.08542600 | 4.50200100   | 6.53563700 L  |
| H-H_  | 13.10258300 | 4.38320200   | 6.97789300 L  |
| C-C_R | 16.22659100 | 3.57675800   | 5.92973200 L  |
| C-C_R | 16.61709700 | 4.80821100   | 5.39470600 L  |
| H-H_  | 16.91808000 | 2.74224100   | 5.90456100 L  |
| N-N_R | 17.89341500 | 4.96068800   | 4.81753500 L  |
| C-C_R | 15.72539000 | 5.88490000   | 5.43694500 L  |
| C-C_R | 18.43609300 | 3.93340500   | 4.02754200 L  |
| C-C_R | 18.62025000 | 6.14799800   | 5.02132000 L  |
| H-H_  | 16.01976300 | 6.83710300   | 5.01200900 L  |
| C-C_R | 19.79758600 | 3.62432700   | 4.10893400 L  |
| C-C_R | 17.62561400 | 3.19717800   | 3.15529200 L  |
| C-C_R | 18.62519400 | 6.76930600   | 6.27457300 L  |

|       |             |             |               |
|-------|-------------|-------------|---------------|
| C-C_R | 19.34429300 | 6.72248700  | 3.97300600 L  |
| H-H_  | 20.42374300 | 4.15894400  | 4.81302000 L  |
| C-C_R | 20.33843200 | 2.63050500  | 3.31629800 L  |
| H-H_  | 16.56944000 | 3.42375700  | 3.08762100 L  |
| C-C_R | 18.17128200 | 2.19248200  | 2.37904200 L  |
| C-C_R | 19.33645300 | 7.94467000  | 6.46616500 L  |
| H-H_  | 18.07304800 | 6.32278800  | 7.09219100 L  |
| H-H_  | 19.33429600 | 6.24811900  | 2.99859400 L  |
| C-C_R | 20.06087400 | 7.89074900  | 4.17656600 L  |
| C-C_R | 19.54136900 | 1.90770200  | 2.42081400 L  |
| H-H_  | 21.38884400 | 2.39114000  | 3.41336800 L  |
| H-H_  | 17.54144300 | 1.61052300  | 1.71718400 L  |
| H-H_  | 19.33309200 | 8.41329800  | 7.44185700 L  |
| C-C_R | 20.05898500 | 8.51184300  | 5.42161800 L  |
| H-H_  | 20.61218700 | 8.32510300  | 3.35118200 L  |
| C-C_R | 20.07378100 | 0.80835500  | 1.59505200 L  |
| H-H_  | 20.61310500 | 9.42972000  | 5.57651800 L  |
| N-N_R | 19.24372000 | -0.21207500 | 1.42497500 L  |
| C-C_R | 21.38526200 | 0.77059900  | 1.04027200 L  |
| N-N_R | 21.86433400 | -0.35489100 | 0.52885100 L  |
| C-C_R | 22.28700700 | 1.93139400  | 0.93247700 L  |
| C-C_R | 21.82011500 | 3.22728100  | 0.67833000 L  |
| C-C_R | 23.67091300 | 1.73103900  | 1.00173600 L  |
| C-C_R | 22.69523600 | 4.28572500  | 0.53760600 L  |
| H-H_  | 20.75804400 | 3.40051700  | 0.55990700 L  |
| H-H_  | 24.04126100 | 0.72536200  | 1.15776500 L  |
| C-C_R | 24.55308900 | 2.78871000  | 0.88039200 L  |
| H-H_  | 22.31884900 | 5.27808600  | 0.31745700 L  |
| C-C_R | 24.07525500 | 4.08418200  | 0.65317300 L  |
| H-H_  | 25.61948300 | 2.61868800  | 0.96537900 L  |
| N-N_R | 24.96240200 | 5.16582900  | 0.53340100 L  |
| C-C_R | 24.63357200 | 6.41094700  | 1.10221300 L  |
| C-C_R | 26.18731200 | 5.00340200  | -0.14399800 L |
| C-C_R | 24.01293200 | 6.47358800  | 2.35322900 L  |
| C-C_R | 24.92360700 | 7.59905200  | 0.42438900 L  |
| C-C_R | 27.35195500 | 5.60233800  | 0.34668500 L  |
| C-C_R | 26.25169400 | 4.24014700  | -1.31277700 L |
| H-H_  | 23.79525300 | 5.55455200  | 2.88422200 L  |
| C-C_R | 23.68849700 | 7.69989200  | 2.91009400 L  |
| H-H_  | 25.39532600 | 7.55396600  | -0.54963300 L |
| C-C_R | 24.60468300 | 8.82137700  | 0.99591000 L  |
| H-H_  | 27.30868400 | 6.18517900  | 1.25874900 L  |
| C-C_R | 28.55206600 | 5.44188300  | -0.32754100 L |
| H-H_  | 25.34829000 | 3.78096400  | -1.69909700 L |

|       |             |              |               |
|-------|-------------|--------------|---------------|
| C-C_R | 27.45994600 | 4.07426800   | -1.97011100 L |
| H-H_  | 23.21252900 | 7.72972500   | 3.88464200 L  |
| C-C_R | 23.98414100 | 8.88165500   | 2.23812700 L  |
| H-H_  | 24.83422400 | 9.73485900   | 0.45676500 L  |
| C-C_R | 28.61595200 | 4.67679000   | -1.48707900 L |
| H-H_  | 29.44875800 | 5.90816300   | 0.06589200 L  |
| H-H_  | 27.49329100 | 3.47883700   | -2.87503900 L |
| H-H_  | 23.73665900 | 9.83932000   | 2.68000700 L  |
| H-H_  | 29.55758700 | 4.54715700   | -2.00627300 L |
| C-C_R | 12.82107100 | -8.06723400  | 2.30151900 L  |
| H-H_  | 12.54580900 | -7.05544700  | 2.02453400 L  |
| C-C_R | 12.21139000 | -10.26949500 | 3.03703300 L  |
| H-H_  | 11.45942700 | -10.98417900 | 3.35218400 L  |
| C-C_R | 11.84202800 | -8.97608900  | 2.69108900 L  |
| H-H_  | 10.80112200 | -8.67543900  | 2.72349000 L  |
| C-C_R | 14.15321900 | -8.44507300  | 2.25272800 L  |
| C-C_R | 14.52652100 | -9.74555900  | 2.60959700 L  |
| H-H_  | 14.91285500 | -7.73966700  | 1.93776800 L  |
| N-N_R | 15.88111600 | -10.13106600 | 2.56925200 L  |
| C-C_R | 13.54294400 | -10.65468100 | 3.00612200 L  |
| C-C_R | 16.87978000 | -9.24160900  | 2.99722200 L  |
| C-C_R | 16.23445600 | -11.41463500 | 2.11185800 L  |
| H-H_  | 13.83059300 | -11.65857200 | 3.29464900 L  |
| C-C_R | 18.09724400 | -9.16137700  | 2.31161800 L  |
| C-C_R | 16.67414900 | -8.41401900  | 4.10714700 L  |
| C-C_R | 15.58138100 | -11.97846800 | 1.01080000 L  |
| C-C_R | 17.23866600 | -12.14264300 | 2.75635500 L  |
| H-H_  | 18.24859400 | -9.76468000  | 1.42466000 L  |
| C-C_R | 19.08924200 | -8.30439800  | 2.74391900 L  |
| H-H_  | 15.73477000 | -8.46346000  | 4.64366500 L  |
| C-C_R | 17.66552300 | -7.54644300  | 4.52420500 L  |
| C-C_R | 15.92743800 | -13.24858300 | 0.57289700 L  |
| H-H_  | 14.80957300 | -11.41445100 | 0.50362800 L  |
| H-H_  | 17.73972400 | -11.71199000 | 3.61530600 L  |
| C-C_R | 17.58446900 | -13.40572500 | 2.30360400 L  |
| C-C_R | 18.90211000 | -7.49316400  | 3.87117200 L  |
| H-H_  | 20.01372900 | -8.24026200  | 2.18430800 L  |
| H-H_  | 17.50025000 | -6.89317400  | 5.37121900 L  |
| H-H_  | 15.41570600 | -13.67088800 | -0.28420800 L |
| C-C_R | 16.93116500 | -13.96859600 | 1.21149100 L  |
| H-H_  | 18.36356100 | -13.95766800 | 2.81670600 L  |
| C-C_R | 19.92091700 | -6.53264700  | 4.33426700 L  |
| H-H_  | 17.19782800 | -14.95954600 | 0.86423800 L  |
| N-N_R | 19.43491000 | -5.39504500  | 4.81201000 L  |

|       |             |              |              |
|-------|-------------|--------------|--------------|
| C-C_R | 21.32788300 | -6.73498100  | 4.24939200 L |
| C-C_R | 20.27643500 | -4.40049800  | 5.11294500 L |
| N-N_R | 22.16411000 | -5.72729900  | 4.45319600 L |
| C-C_R | 21.97594900 | -8.03447700  | 3.99447000 L |
| C-C_R | 21.67820700 | -4.54462000  | 4.84358800 L |
| C-C_R | 19.78230400 | -3.19676600  | 5.66887900 L |
| C-C_R | 21.46007900 | -9.24216900  | 4.47944200 L |
| C-C_R | 23.19935600 | -8.06638800  | 3.31404800 L |
| C-C_R | 22.54888700 | -3.44239100  | 5.01999100 L |
| C-C_R | 20.66469400 | -2.11537300  | 5.90215600 L |
| C-C_R | 18.40859700 | -3.07468300  | 5.99163600 L |
| C-C_R | 22.11560000 | -10.43785600 | 4.26082400 L |
| H-H_  | 20.54581800 | -9.23994000  | 5.06135000 L |
| H-H_  | 23.62494000 | -7.13159800  | 2.97082700 L |
| C-C_R | 23.85437900 | -9.25988600  | 3.07505900 L |
| C-C_R | 22.04368200 | -2.21858600  | 5.51914900 L |
| C-C_R | 23.92323100 | -3.56523800  | 4.69733200 L |
| N-N_R | 17.28294400 | -2.97443800  | 6.25571900 L |
| H-H_  | 21.71604600 | -11.36036700 | 4.66275300 L |
| C-C_R | 23.31597000 | -10.46539500 | 3.54010000 L |
| H-H_  | 24.78417600 | -9.26776500  | 2.52132400 L |
| N-N_R | 25.04822100 | -3.66461100  | 4.43414400 L |
| N-N_R | 23.97016500 | -11.68486700 | 3.29784900 L |
| C-C_R | 23.21956600 | -12.83298400 | 2.98359200 L |
| C-C_R | 25.37539900 | -11.75610600 | 3.35778100 L |
| C-C_R | 22.11052000 | -12.74187100 | 2.13733600 L |
| C-C_R | 23.57691700 | -14.07930700 | 3.50827600 L |
| C-C_R | 26.08553500 | -12.52044500 | 2.42808800 L |
| C-C_R | 26.07509100 | -11.05908300 | 4.34810800 L |
| H-H_  | 21.83716200 | -11.77922700 | 1.72081100 L |
| C-C_R | 21.37323200 | -13.87422600 | 1.82876700 L |
| H-H_  | 24.43055900 | -14.15184800 | 4.17190200 L |
| C-C_R | 22.83913700 | -15.20753800 | 3.18415800 L |
| H-H_  | 25.54678400 | -13.05159900 | 1.65243300 L |
| C-C_R | 27.46916000 | -12.59159900 | 2.49651000 L |
| H-H_  | 25.52800600 | -10.47155500 | 5.07465800 L |
| C-C_R | 27.45984100 | -11.12516200 | 4.39790200 L |
| H-H_  | 20.51874600 | -13.78625500 | 1.16848900 L |
| C-C_R | 21.73280800 | -15.11431800 | 2.34680100 L |
| H-H_  | 23.12627900 | -16.16628500 | 3.60263100 L |
| C-C_R | 28.16371800 | -11.89222600 | 3.47739600 L |
| H-H_  | 28.00734600 | -13.18428000 | 1.76726700 L |
| H-H_  | 27.98868400 | -10.57908800 | 5.17069000 L |
| H-H_  | 21.16009200 | -15.99946100 | 2.09936100 L |



|       |             |              |               |
|-------|-------------|--------------|---------------|
| H-H_  | 29.24516900 | -11.94357200 | 3.52283000 L  |
| C-C_R | 15.94524900 | 2.63332700   | 11.56770700 L |
| H-H_  | 15.65625100 | 1.67189800   | 11.97767800 L |
| C-C_R | 15.45208300 | 4.93453900   | 11.09096600 L |
| H-H_  | 14.76911700 | 5.77583800   | 11.11361300 L |
| C-C_R | 15.06300100 | 3.70685300   | 11.61556200 L |
| H-H_  | 14.08079500 | 3.58729000   | 12.05791600 L |
| C-C_R | 17.20480300 | 2.78084500   | 11.00975500 L |
| C-C_R | 17.59467200 | 4.01306300   | 10.47463000 L |
| H-H_  | 17.89565500 | 1.94709300   | 10.98448600 L |
| N-N_R | 18.87099000 | 4.16553900   | 9.89745900 L  |
| C-C_R | 16.70360200 | 5.08898700   | 10.51696800 L |
| C-C_R | 19.41366800 | 3.13825600   | 9.10746600 L  |
| C-C_R | 19.59782400 | 5.35285000   | 10.10124500 L |
| H-H_  | 16.99733800 | 6.04195400   | 10.09193300 L |
| C-C_R | 20.77516100 | 2.82917800   | 9.18885800 L  |
| C-C_R | 18.60318900 | 2.40203000   | 8.23521700 L  |
| C-C_R | 19.60276800 | 5.97415800   | 11.35449800 L |
| C-C_R | 20.32250500 | 5.92657400   | 9.05302900 L  |
| H-H_  | 21.40195500 | 3.36303100   | 9.89304300 L  |
| C-C_R | 21.31600700 | 1.83535700   | 8.39622200 L  |
| H-H_  | 17.54765200 | 2.62784500   | 8.16764400 L  |
| C-C_R | 19.14885600 | 1.39733400   | 7.45896700 L  |
| C-C_R | 20.31402800 | 7.14952100   | 11.54608900 L |
| H-H_  | 19.05126100 | 5.52687500   | 12.17221400 L |
| H-H_  | 20.31250800 | 5.45220600   | 8.07861700 L  |
| C-C_R | 21.03844900 | 7.09560100   | 9.25649100 L  |
| C-C_R | 20.51894400 | 1.11255300   | 7.50073900 L  |
| H-H_  | 22.36705700 | 1.59522700   | 8.49339200 L  |
| H-H_  | 18.51965500 | 0.81461100   | 6.79720700 L  |
| H-H_  | 20.31130400 | 7.61738500   | 12.52188100 L |
| C-C_R | 21.03656000 | 7.71669400   | 10.50154200 L |
| H-H_  | 21.58976200 | 7.52995500   | 8.43110600 L  |
| C-C_R | 21.05135600 | 0.01320600   | 6.67497700 L  |
| H-H_  | 21.59068000 | 8.63457200   | 10.65644200 L |
| N-N_R | 20.22129500 | -1.00722400  | 6.50489900 L  |
| C-C_R | 22.36347400 | -0.02531300  | 6.12029500 L  |
| N-N_R | 22.84190900 | -1.15004000  | 5.60877500 L  |
| C-C_R | 23.26458200 | 1.13624600   | 6.01240100 L  |
| C-C_R | 22.79769000 | 2.43213300   | 5.75825400 L  |
| C-C_R | 24.64848700 | 0.93589000   | 6.08166000 L  |
| C-C_R | 23.67281000 | 3.49057700   | 5.61753000 L  |
| H-H_  | 21.73561900 | 2.60536800   | 5.63983100 L  |
| H-H_  | 25.01883500 | -0.06978600  | 6.23768900 L  |

|       |             |              |              |
|-------|-------------|--------------|--------------|
| C-C_R | 25.53130100 | 1.99279700   | 5.96041600 L |
| H-H_  | 23.29706100 | 4.48217400   | 5.39748000 L |
| C-C_R | 25.05283000 | 3.28903400   | 5.73309700 L |
| H-H_  | 26.59705800 | 1.82354000   | 6.04530300 L |
| N-N_R | 25.94061400 | 4.36991700   | 5.61342400 L |
| C-C_R | 25.61178400 | 5.61503500   | 6.18223600 L |
| C-C_R | 27.16552400 | 4.20748900   | 4.93602500 L |
| C-C_R | 24.99050700 | 5.67844000   | 7.43315300 L |
| C-C_R | 25.90118200 | 6.80390400   | 5.50431300 L |
| C-C_R | 28.33016800 | 4.80642600   | 5.42670800 L |
| C-C_R | 27.22990600 | 3.44423400   | 3.76724600 L |
| H-H_  | 24.77282800 | 4.75940400   | 7.96414600 L |
| C-C_R | 24.66607200 | 6.90474400   | 7.99001800 L |
| H-H_  | 26.37290000 | 6.75881800   | 4.53029100 L |
| C-C_R | 25.58289500 | 8.02546400   | 6.07593300 L |
| H-H_  | 28.28689600 | 5.38926700   | 6.33877200 L |
| C-C_R | 29.52966600 | 4.64662700   | 4.75139000 L |
| H-H_  | 26.32650200 | 2.98505200   | 3.38092600 L |
| C-C_R | 28.43752000 | 3.27912000   | 3.10981400 L |
| H-H_  | 24.19012900 | 6.93447000   | 8.96357300 L |
| C-C_R | 24.96235300 | 8.08574200   | 7.31815000 L |
| H-H_  | 25.81243600 | 8.93894700   | 5.53678800 L |
| C-C_R | 29.59352600 | 3.88164100   | 3.59284500 L |
| H-H_  | 30.42633300 | 5.11301500   | 5.14581600 L |
| H-H_  | 28.47150300 | 2.68292400   | 2.20498400 L |
| H-H_  | 24.71487100 | 9.04340800   | 7.76003000 L |
| H-H_  | 30.53516200 | 3.75200800   | 3.07365100 L |
| C-C_R | 13.79928300 | -8.86314600  | 7.38154200 L |
| H-H_  | 13.52402100 | -7.85136000  | 7.10455700 L |
| C-C_R | 13.18960200 | -11.06540700 | 8.11705700 L |
| H-H_  | 12.43700200 | -11.77932700 | 8.43210800 L |
| C-C_R | 12.81962800 | -9.77134400  | 7.77002000 L |
| H-H_  | 11.77933400 | -9.47135200  | 7.80351300 L |
| C-C_R | 15.13145700 | -9.24109300  | 7.33175700 L |
| C-C_R | 15.50473300 | -10.54147200 | 7.68962000 L |
| H-H_  | 15.89043000 | -8.53481500  | 7.01769200 L |
| N-N_R | 16.85932800 | -10.92697900 | 7.64927500 L |
| C-C_R | 14.52051900 | -11.44982900 | 8.08604600 L |
| C-C_R | 17.85735400 | -10.03675700 | 8.07714700 L |
| C-C_R | 17.21203000 | -12.20978300 | 7.19178200 L |
| H-H_  | 14.80880500 | -12.45448400 | 8.37467200 L |
| C-C_R | 19.07545600 | -9.95729000  | 7.39164100 L |
| C-C_R | 17.65236100 | -9.20993100  | 9.18717000 L |
| C-C_R | 16.55895600 | -12.77361700 | 6.09072400 L |

|       |             |              |               |
|-------|-------------|--------------|---------------|
| C-C_R | 18.21624000 | -12.93779100 | 7.83628000 L  |
| H-H_  | 19.22616900 | -10.55982800 | 6.50458400 L  |
| C-C_R | 20.06681700 | -9.09954600  | 7.82384400 L  |
| H-H_  | 16.71234500 | -9.25860900  | 9.72358900 L  |
| C-C_R | 18.64309800 | -8.34159100  | 9.60413000 L  |
| C-C_R | 16.90501200 | -14.04373100 | 5.65282200 L  |
| H-H_  | 15.78714800 | -12.20959900 | 5.58355200 L  |
| H-H_  | 18.71729900 | -12.50713800 | 8.69523000 L  |
| C-C_R | 18.56207000 | -14.20098100 | 7.38253500 L  |
| C-C_R | 19.87968500 | -8.28831300  | 8.95109600 L  |
| H-H_  | 20.99130400 | -9.03541000  | 7.26423200 L  |
| H-H_  | 18.47782500 | -7.68832300  | 10.45114300 L |
| H-H_  | 16.39391800 | -14.46680100 | 4.79581500 L  |
| C-C_R | 17.90873900 | -14.76374400 | 6.29141600 L  |
| H-H_  | 19.34113500 | -14.75281700 | 7.89663100 L  |
| C-C_R | 20.89849200 | -7.32779500  | 9.41419200 L  |
| H-H_  | 18.17540300 | -15.75469500 | 5.94416200 L  |
| N-N_R | 20.41248400 | -6.19019300  | 9.89193500 L  |
| C-C_R | 22.30609500 | -7.53089300  | 9.32941500 L  |
| C-C_R | 21.25400900 | -5.19564700  | 10.19286900 L |
| N-N_R | 23.14168400 | -6.52244700  | 9.53312000 L  |
| C-C_R | 22.95416100 | -8.83039000  | 9.07449300 L  |
| C-C_R | 22.65641900 | -5.34053300  | 9.92361100 L  |
| C-C_R | 20.76051600 | -3.99267800  | 10.74890200 L |
| C-C_R | 22.43829100 | -10.03808200 | 9.55946500 L  |
| C-C_R | 24.17693000 | -8.86153600  | 8.39397200 L  |
| C-C_R | 23.52709900 | -4.23830300  | 10.10001400 L |
| C-C_R | 21.64226900 | -2.91052100  | 10.98208000 L |
| C-C_R | 19.38617200 | -3.86983100  | 11.07156000 L |
| C-C_R | 23.09381200 | -11.23376900 | 9.34084700 L  |
| H-H_  | 21.52403000 | -10.03585300 | 10.14137300 L |
| H-H_  | 24.60251500 | -7.92674700  | 8.05075200 L  |
| C-C_R | 24.83195400 | -10.05503400 | 8.15498300 L  |
| C-C_R | 23.02189400 | -3.01449900  | 10.59917200 L |
| C-C_R | 24.90080500 | -4.36038700  | 9.77725600 L  |
| N-N_R | 18.26054400 | -3.76969400  | 11.33464900 L |
| H-H_  | 22.69362000 | -12.15551500 | 9.74267700 L  |
| C-C_R | 24.29354500 | -11.26054300 | 8.62002500 L  |
| H-H_  | 25.76175100 | -10.06291400 | 7.60124900 L  |
| N-N_R | 26.02643300 | -4.46052400  | 9.51416700 L  |
| N-N_R | 24.94774000 | -12.48001600 | 8.37777400 L  |
| C-C_R | 24.19777800 | -13.62889700 | 8.06361500 L  |
| C-C_R | 26.35361100 | -12.55201900 | 8.43780400 L  |
| C-C_R | 23.08809400 | -13.53701900 | 7.21726100 L  |

|       |             |              |               |
|-------|-------------|--------------|---------------|
| C-C_R | 24.55449200 | -14.87445500 | 8.58820000 L  |
| C-C_R | 27.06374700 | -13.31635800 | 7.50811100 L  |
| C-C_R | 27.05330300 | -11.85499600 | 9.42813100 L  |
| H-H_  | 22.81473700 | -12.57437500 | 6.80073600 L  |
| C-C_R | 22.35080700 | -14.66937400 | 6.90869200 L  |
| H-H_  | 25.40813400 | -14.94699600 | 9.25182600 L  |
| C-C_R | 23.81671200 | -16.00268600 | 8.26408300 L  |
| H-H_  | 26.52502200 | -13.84761800 | 6.73146200 L  |
| C-C_R | 28.44673500 | -13.38674700 | 7.57643400 L  |
| H-H_  | 26.50558100 | -11.26670400 | 10.15458200 L |
| C-C_R | 28.43741500 | -11.92031000 | 9.47782700 L  |
| H-H_  | 21.49632000 | -14.58140400 | 6.24841300 L  |
| C-C_R | 22.71038300 | -15.90946600 | 7.42672600 L  |
| H-H_  | 24.10385400 | -16.96143300 | 8.68255500 L  |
| C-C_R | 29.14131900 | -12.68748100 | 8.55632700 L  |
| H-H_  | 28.98494600 | -13.97953500 | 6.84619800 L  |
| H-H_  | 28.96628500 | -11.37434300 | 10.24962100 L |
| H-H_  | 22.13766700 | -16.79461000 | 7.17928500 L  |
| H-H_  | 30.22338200 | -12.73948500 | 8.60285300 L  |
| C-C_R | 16.92282400 | 1.83817800   | 16.64763200 L |
| H-H_  | 16.63382600 | 0.87674900   | 17.05760200 L |
| C-C_R | 16.43029500 | 4.13862600   | 16.17098900 L |
| H-H_  | 15.74671700 | 4.98058200   | 16.19254300 L |
| C-C_R | 16.04057600 | 2.91170400   | 16.69548600 L |
| H-H_  | 15.05837000 | 2.79214100   | 17.13784000 L |
| C-C_R | 18.18237700 | 1.98569700   | 16.08967900 L |
| C-C_R | 18.57224600 | 3.21791400   | 15.55455500 L |
| H-H_  | 18.87323000 | 1.15194500   | 16.06441000 L |
| N-N_R | 19.84856500 | 3.37039100   | 14.97738400 L |
| C-C_R | 17.68117600 | 4.29383900   | 15.59689300 L |
| C-C_R | 20.39126800 | 2.34300100   | 14.18639700 L |
| C-C_R | 20.57539900 | 4.55770100   | 15.18116900 L |
| H-H_  | 17.97555000 | 5.24604200   | 15.17195600 L |
| C-C_R | 21.75337300 | 2.03326600   | 14.26888200 L |
| C-C_R | 19.58140100 | 1.60611700   | 13.31524000 L |
| C-C_R | 20.58098000 | 5.17824500   | 16.43452100 L |
| C-C_R | 21.30007900 | 5.13142600   | 14.13295400 L |
| H-H_  | 22.37953000 | 2.56788300   | 14.97296800 L |
| C-C_R | 22.29358200 | 1.04020800   | 13.47614600 L |
| H-H_  | 18.52522700 | 1.83269600   | 13.24756800 L |
| C-C_R | 20.12706800 | 0.60142100   | 12.53899000 L |
| C-C_R | 21.29160200 | 6.35437300   | 16.62601300 L |
| H-H_  | 20.02883500 | 4.73172700   | 17.25213800 L |
| H-H_  | 21.29008300 | 4.65705800   | 13.15854100 L |

|       |             |             |               |
|-------|-------------|-------------|---------------|
| C-C_R | 22.01602400 | 6.30045200  | 14.33641500 L |
| C-C_R | 21.49715600 | 0.31664100  | 12.58076200 L |
| H-H_  | 23.34463100 | 0.80007900  | 13.57331600 L |
| H-H_  | 19.49723000 | 0.01946200  | 11.87713100 L |
| H-H_  | 21.28887900 | 6.82223700  | 17.60180500 L |
| C-C_R | 22.01477200 | 6.92078200  | 15.58156500 L |
| H-H_  | 22.56797400 | 6.73404200  | 13.51112900 L |
| C-C_R | 22.02893000 | -0.78194200 | 11.75490100 L |
| H-H_  | 22.56889200 | 7.83865900  | 15.73646500 L |
| N-N_R | 21.19886900 | -1.80237200 | 11.58482300 L |
| C-C_R | 23.34104900 | -0.82046200 | 11.20021900 L |
| N-N_R | 23.82012100 | -1.94595200 | 10.68879800 L |
| C-C_R | 24.24279400 | 0.34033300  | 11.09242400 L |
| C-C_R | 23.77592800 | 1.63611300  | 10.83728300 L |
| C-C_R | 25.62672500 | 0.13987100  | 11.16068900 L |
| C-C_R | 24.65104800 | 2.69455700  | 10.69655900 L |
| H-H_  | 22.71319400 | 1.81022000  | 10.71975600 L |
| H-H_  | 25.99641000 | -0.86493500 | 11.31761400 L |
| C-C_R | 26.50890200 | 1.19754200  | 11.03934600 L |
| H-H_  | 24.27463600 | 3.68702500  | 10.47740500 L |
| C-C_R | 26.03040500 | 2.49388600  | 10.81302200 L |
| H-H_  | 27.57463200 | 1.02839100  | 11.12522800 L |
| N-N_R | 26.91818900 | 3.57476800  | 10.69334900 L |
| C-C_R | 26.58935900 | 4.81988600  | 11.26216100 L |
| C-C_R | 28.14309900 | 3.41234100  | 10.01594900 L |
| C-C_R | 25.96871900 | 4.88252700  | 12.51317600 L |
| C-C_R | 26.87939400 | 6.00799100  | 10.58433600 L |
| C-C_R | 29.30774200 | 4.01127700  | 10.50663200 L |
| C-C_R | 28.20748000 | 2.64908600  | 8.84717100 L  |
| H-H_  | 25.75040200 | 3.96425600  | 13.04407100 L |
| C-C_R | 25.64364700 | 6.10959600  | 13.06994300 L |
| H-H_  | 27.35047500 | 5.96367000  | 9.61021600 L  |
| C-C_R | 26.56046900 | 7.23031600  | 11.15585700 L |
| H-H_  | 29.26447100 | 4.59411800  | 11.41869700 L |
| C-C_R | 30.50724100 | 3.85147900  | 9.83131400 L  |
| H-H_  | 27.30407700 | 2.18990300  | 8.46085000 L  |
| C-C_R | 29.41509500 | 2.48397200  | 8.18973800 L  |
| H-H_  | 25.16770400 | 6.13932100  | 14.04349700 L |
| C-C_R | 25.93992800 | 7.29059400  | 12.39807400 L |
| H-H_  | 26.79001100 | 8.14379800  | 10.61671200 L |
| C-C_R | 30.57110100 | 3.08649300  | 8.67277000 L  |
| H-H_  | 31.40390700 | 4.31786600  | 10.22574100 L |
| H-H_  | 29.44907800 | 1.88777600  | 7.28490800 L  |
| H-H_  | 25.69244600 | 8.24825900  | 12.83995500 L |

|       |              |             |                |
|-------|--------------|-------------|----------------|
| H-H_  | 31.51273600  | 2.95686000  | 8.15357600 L   |
| C-C_R | -28.44107500 | -1.44823200 | -9.41028900 L  |
| H-H_  | -28.71567400 | -0.43731700 | -9.68816900 L  |
| C-C_R | -29.05088900 | -3.65189400 | -8.67462700 L  |
| H-H_  | -29.80269300 | -4.36528500 | -8.36061800 L  |
| C-C_R | -29.42009200 | -2.35719400 | -9.02171300 L  |
| H-H_  | -30.46113100 | -2.05794500 | -8.98916500 L  |
| C-C_R | -27.10826400 | -1.82694300 | -9.45997500 L  |
| C-C_R | -26.73559900 | -3.12666500 | -9.10320500 L  |
| H-H_  | -26.35003500 | -1.12140900 | -9.77498500 L  |
| N-N_R | -25.38113700 | -3.51357200 | -9.14340300 L  |
| C-C_R | -27.71917600 | -4.03578700 | -8.70668000 L  |
| C-C_R | -24.38234000 | -2.62271400 | -8.71558000 L  |
| C-C_R | -25.02846000 | -4.79626900 | -9.59990200 L  |
| H-H_  | -27.43089000 | -5.04044200 | -8.41805400 L  |
| C-C_R | -23.16423900 | -2.54324700 | -9.40108500 L  |
| C-C_R | -24.58810400 | -1.79652500 | -7.60550800 L  |
| C-C_R | -25.68150900 | -5.36021000 | -10.70195400 L |
| C-C_R | -24.02345500 | -5.52374800 | -8.95644700 L  |
| H-H_  | -23.01429600 | -3.14642200 | -10.28809400 L |
| C-C_R | -22.17290300 | -1.68539600 | -8.96788900 L  |
| H-H_  | -25.52812000 | -1.84520200 | -7.06908900 L  |
| C-C_R | -23.59659700 | -0.92754800 | -7.18859700 L  |
| C-C_R | -25.33468300 | -6.62968800 | -11.13990500 L |
| H-H_  | -26.45254700 | -4.79555700 | -11.20917400 L |
| H-H_  | -23.52239600 | -5.09309500 | -8.09749600 L  |
| C-C_R | -23.67765100 | -6.78683100 | -9.40919800 L  |
| C-C_R | -22.36001000 | -0.87427000 | -7.84163000 L  |
| H-H_  | -21.24841700 | -1.62126000 | -9.52750100 L  |
| H-H_  | -23.76264000 | -0.27491600 | -6.34153500 L  |
| H-H_  | -25.84654700 | -7.05339400 | -11.99686300 L |
| C-C_R | -24.33095600 | -7.34970200 | -10.50131100 L |
| H-H_  | -22.89933000 | -7.33941000 | -8.89604700 L  |
| C-C_R | -21.34197300 | 0.08561100  | -7.37848600 L  |
| H-H_  | -24.06429200 | -8.34065200 | -10.84856500 L |
| N-N_R | -21.82798100 | 1.22321400  | -6.90074300 L  |
| C-C_R | -19.93439600 | -0.11738000 | -7.46226900 L  |
| C-C_R | -20.98645600 | 2.21776000  | -6.59980800 L  |
| N-N_R | -19.09801100 | 0.89159600  | -7.25960600 L  |
| C-C_R | -19.28553400 | -1.41634700 | -7.71823400 L  |
| C-C_R | -19.58330100 | 2.07361700  | -6.86812100 L  |
| C-C_R | -21.47917900 | 3.42136400  | -6.04382500 L  |
| C-C_R | -19.80281100 | -2.62391100 | -7.23331100 L  |
| C-C_R | -18.06276500 | -1.44749400 | -8.39875400 L  |

|       |              |             |                |
|-------|--------------|-------------|----------------|
| C-C_R | -18.71336600 | 3.17510300  | -6.69266400 L  |
| C-C_R | -20.59822200 | 4.50299200  | -5.80960400 L  |
| C-C_R | -22.85429300 | 3.54357600  | -5.72111700 L  |
| C-C_R | -19.14588300 | -3.81972600 | -7.45188000 L  |
| H-H_  | -20.71630200 | -2.62104600 | -6.65145200 L  |
| H-H_  | -17.63718000 | -0.51270400 | -8.74197500 L  |
| C-C_R | -17.40851100 | -2.64162700 | -8.63769500 L  |
| C-C_R | -19.21857100 | 4.39890800  | -6.19350600 L  |
| C-C_R | -17.33891500 | 3.05376300  | -7.01447600 L  |
| N-N_R | -23.97994600 | 3.64382000  | -5.45703500 L  |
| H-H_  | -19.54684500 | -4.74210900 | -7.05000100 L  |
| C-C_R | -17.94692000 | -3.84713700 | -8.17265300 L  |
| H-H_  | -16.47794400 | -2.64887100 | -9.19147800 L  |
| N-N_R | -16.21326200 | 2.95351900  | -7.27855900 L  |
| N-N_R | -17.29195500 | -5.06597300 | -8.41495300 L  |
| C-C_R | -18.04191700 | -6.21485400 | -8.72911200 L  |
| C-C_R | -15.88608400 | -5.13797600 | -8.35492200 L  |
| C-C_R | -19.15237100 | -6.12361300 | -9.57541700 L  |
| C-C_R | -17.68520300 | -7.46041300 | -8.20452600 L  |
| C-C_R | -15.17671800 | -5.90295100 | -9.28456700 L  |
| C-C_R | -15.18639200 | -4.44095300 | -7.36459500 L  |
| H-H_  | -19.42572800 | -5.16096900 | -9.99194200 L  |
| C-C_R | -19.88891400 | -7.25522500 | -9.88304100 L  |
| H-H_  | -16.83233100 | -7.53358900 | -7.54085200 L  |
| C-C_R | -18.42300800 | -8.58853600 | -8.52765000 L  |
| H-H_  | -15.71469800 | -6.43346800 | -10.06027100 L |
| C-C_R | -13.79373000 | -5.97334100 | -9.21624400 L  |
| H-H_  | -15.73488400 | -3.85329700 | -6.63809600 L  |
| C-C_R | -13.80305000 | -4.50690400 | -7.31485100 L  |
| H-H_  | -20.74337500 | -7.16736100 | -10.54431300 L |
| C-C_R | -19.52931200 | -8.49542400 | -9.36600100 L  |
| H-H_  | -18.13661100 | -9.54802700 | -8.11012300 L  |
| C-C_R | -13.09840200 | -5.27333200 | -8.23540600 L  |
| H-H_  | -13.25554400 | -6.56602200 | -9.94548600 L  |
| H-H_  | -13.27420600 | -3.96083000 | -6.54206300 L  |
| H-H_  | -20.10202800 | -9.38056700 | -9.61344100 L  |
| H-H_  | -12.01631300 | -5.32544200 | -8.18987400 L  |
| C-C_R | -25.31764100 | 9.25158500  | -0.14504600 L  |
| H-H_  | -25.60586900 | 8.29079200  | 0.26487600 L   |
| C-C_R | -25.81017000 | 11.55203300 | -0.62168900 L  |
| H-H_  | -26.49377400 | 12.39409600 | -0.59914100 L  |
| C-C_R | -26.19988900 | 10.32511100 | -0.09719200 L  |
| H-H_  | -27.18132500 | 10.20618400 | 0.34511300 L   |
| C-C_R | -24.05731800 | 9.39973900  | -0.70304700 L  |

|       |              |             |               |
|-------|--------------|-------------|---------------|
| C-C_R | -23.66744800 | 10.63195700 | -1.23817200 L |
| H-H_  | -23.36723600 | 8.56535100  | -0.72826800 L |
| N-N_R | -22.39190000 | 10.78379800 | -1.81529400 L |
| C-C_R | -24.55851800 | 11.70788100 | -1.19583400 L |
| C-C_R | -21.84845200 | 9.75715000  | -2.60533600 L |
| C-C_R | -21.66506600 | 11.97110800 | -1.61150900 L |
| H-H_  | -24.26414500 | 12.66008400 | -1.62077000 L |
| C-C_R | -20.48632200 | 9.44730800  | -2.52384500 L |
| C-C_R | -22.65829400 | 9.02016000  | -3.47748700 L |
| C-C_R | -21.65871400 | 12.59228800 | -0.35820600 L |
| C-C_R | -20.94038600 | 12.54483300 | -2.65972400 L |
| H-H_  | -19.86016500 | 9.98192600  | -1.81975900 L |
| C-C_R | -19.94613900 | 8.45435800  | -3.31558600 L |
| H-H_  | -23.71526400 | 9.24621000  | -3.54411600 L |
| C-C_R | -22.11403400 | 8.01559200  | -4.25378700 L |
| C-C_R | -20.94886300 | 13.76778000 | -0.16666500 L |
| H-H_  | -22.21086000 | 12.14576900 | 0.45941200 L  |
| H-H_  | -20.94963700 | 12.07120700 | -3.63319100 L |
| C-C_R | -20.22446700 | 13.71396600 | -2.45526900 L |
| C-C_R | -20.74330900 | 7.73004700  | -4.21191600 L |
| H-H_  | -18.89508900 | 8.21422800  | -3.21841700 L |
| H-H_  | -22.74326000 | 7.43297600  | -4.91455300 L |
| H-H_  | -20.95161100 | 14.23575000 | 0.81012100 L  |
| C-C_R | -20.22556000 | 14.33558800 | -1.21126000 L |
| H-H_  | -19.67174600 | 14.14819200 | -3.28060300 L |
| C-C_R | -20.21076400 | 6.63210100  | -5.03782600 L |
| H-H_  | -19.67159900 | 15.25217300 | -1.05521900 L |
| N-N_R | -21.04082500 | 5.61167100  | -5.20790300 L |
| C-C_R | -18.89941600 | 6.59294500  | -5.59245900 L |
| N-N_R | -18.41957400 | 5.46809000  | -6.10392800 L |
| C-C_R | -17.99753800 | 7.75514000  | -5.70040100 L |
| C-C_R | -18.46456300 | 9.04962700  | -5.95440100 L |
| C-C_R | -16.61299500 | 7.55402000  | -5.63104400 L |
| C-C_R | -17.58931000 | 10.10947100 | -6.09527200 L |
| H-H_  | -19.52650100 | 9.22426300  | -6.07297100 L |
| H-H_  | -16.24328500 | 6.54910800  | -5.47511300 L |
| C-C_R | -15.73158900 | 8.61105500  | -5.75233800 L |
| H-H_  | -17.96582900 | 11.10043200 | -6.31527300 L |
| C-C_R | -16.21006000 | 9.90729200  | -5.97965600 L |
| H-H_  | -14.66583300 | 8.44179800  | -5.66745000 L |
| N-N_R | -15.32150600 | 10.98881100 | -6.09937800 L |
| C-C_R | -15.65110600 | 12.23329300 | -5.53051700 L |
| C-C_R | -14.09662200 | 10.82649100 | -6.77578300 L |
| C-C_R | -16.27097600 | 12.29657000 | -4.27955000 L |



|       |              |             |               |
|-------|--------------|-------------|---------------|
| C-C_R | -15.36170900 | 13.42216200 | -6.20844000 L |
| C-C_R | -12.93195300 | 11.42532000 | -6.28609500 L |
| C-C_R | -14.03298500 | 10.06249200 | -7.94550700 L |
| H-H_  | -16.49006300 | 11.37766200 | -3.74860700 L |
| C-C_R | -16.59604800 | 13.52363800 | -3.72278400 L |
| H-H_  | -14.88922000 | 13.37771200 | -7.18251100 L |
| C-C_R | -15.67922500 | 14.64435800 | -5.63687000 L |
| H-H_  | -12.97522400 | 12.00816100 | -5.37403000 L |
| C-C_R | -11.73248000 | 11.26562800 | -6.96041800 L |
| H-H_  | -14.93561800 | 9.60394600  | -8.33187600 L |
| C-C_R | -12.82460000 | 9.89801400  | -8.60298900 L |
| H-H_  | -17.07201700 | 13.55347100 | -2.74823600 L |
| C-C_R | -16.29979300 | 14.70474300 | -4.39365800 L |
| H-H_  | -15.45047900 | 15.55731200 | -6.17497200 L |
| C-C_R | -11.66936400 | 10.49990000 | -8.11990800 L |
| H-H_  | -10.83578700 | 11.73190900 | -6.56698600 L |
| H-H_  | -12.79061700 | 9.30181800  | -9.50781800 L |
| H-H_  | -16.54724900 | 15.66230200 | -3.95277200 L |
| H-H_  | -10.72695900 | 10.37090300 | -8.63915100 L |
| C-C_R | -27.46286300 | -2.24414500 | -4.33026600 L |
| H-H_  | -27.73809900 | -1.23246600 | -4.60824500 L |
| C-C_R | -28.07328800 | -4.44714900 | -3.59569700 L |
| H-H_  | -28.82448100 | -5.16119700 | -3.28059500 L |
| C-C_R | -28.44251700 | -3.15234300 | -3.94178900 L |
| H-H_  | -29.48355600 | -2.85309400 | -3.90924100 L |
| C-C_R | -26.13068900 | -2.62209200 | -4.38005100 L |
| C-C_R | -25.75738700 | -3.92257800 | -4.02318200 L |
| H-H_  | -25.37246000 | -1.91655700 | -4.69506100 L |
| N-N_R | -24.40356200 | -4.30872100 | -4.06347800 L |
| C-C_R | -26.74096400 | -4.83169900 | -3.62665700 L |
| C-C_R | -23.40412800 | -3.41862700 | -3.63555700 L |
| C-C_R | -24.05022300 | -5.59228900 | -4.52087300 L |
| H-H_  | -26.45331500 | -5.83559000 | -3.33813000 L |
| C-C_R | -22.18666400 | -3.33839600 | -4.32116100 L |
| C-C_R | -23.61052900 | -2.59167300 | -2.52558400 L |
| C-C_R | -24.70329700 | -6.15612300 | -5.62193100 L |
| C-C_R | -23.04524300 | -6.31966100 | -3.87642400 L |
| H-H_  | -22.03608400 | -3.94233400 | -5.20807100 L |
| C-C_R | -21.19532900 | -2.48054500 | -3.88796500 L |
| H-H_  | -24.54990800 | -2.64111500 | -1.98906600 L |
| C-C_R | -22.61838500 | -1.72346100 | -2.10857400 L |
| C-C_R | -24.35710800 | -7.42483700 | -6.05998000 L |
| H-H_  | -25.47497200 | -5.59070500 | -6.12925000 L |
| H-H_  | -22.54482100 | -5.88824400 | -3.01757200 L |

|       |              |             |               |
|-------|--------------|-------------|---------------|
| C-C_R | -22.69943900 | -7.58274400 | -4.32917500 L |
| C-C_R | -21.38179800 | -1.67018300 | -2.76160700 L |
| H-H_  | -20.27020500 | -2.41717300 | -4.44747700 L |
| H-H_  | -22.78506500 | -1.07006500 | -1.26161000 L |
| H-H_  | -24.86897200 | -7.84854200 | -6.91693900 L |
| C-C_R | -23.35338100 | -8.14485000 | -5.42138600 L |
| H-H_  | -21.92175500 | -8.13455900 | -3.81612300 L |
| C-C_R | -20.36439800 | -0.70953700 | -2.29856200 L |
| H-H_  | -23.08671700 | -9.13580000 | -5.76864000 L |
| N-N_R | -20.85040600 | 0.42806500  | -1.82081900 L |
| C-C_R | -18.95679600 | -0.91263500 | -2.38333900 L |
| C-C_R | -20.00824400 | 1.42184700  | -1.51978500 L |
| N-N_R | -18.11979900 | 0.09568300  | -2.17958300 L |
| C-C_R | -18.30795900 | -2.21149600 | -2.63831000 L |
| C-C_R | -18.60570100 | 1.27836100  | -1.78919100 L |
| C-C_R | -20.50160400 | 2.62621600  | -0.96390000 L |
| C-C_R | -18.82459900 | -3.41982400 | -2.15328800 L |
| C-C_R | -17.08519000 | -2.24264200 | -3.31883000 L |
| C-C_R | -17.73579200 | 2.37995500  | -1.61274000 L |
| C-C_R | -19.62000900 | 3.70708000  | -0.72958100 L |
| C-C_R | -21.87671800 | 2.74842700  | -0.64119300 L |
| C-C_R | -18.16830800 | -4.61487400 | -2.37195600 L |
| H-H_  | -19.73809000 | -3.41695800 | -1.57142900 L |
| H-H_  | -16.65960500 | -1.30785300 | -3.66205100 L |
| C-C_R | -16.43093600 | -3.43677600 | -3.55777100 L |
| C-C_R | -18.24099600 | 3.60376000  | -1.11358200 L |
| C-C_R | -16.36070300 | 2.25785000  | -1.93445300 L |
| N-N_R | -23.00173400 | 2.84790700  | -0.37701100 L |
| H-H_  | -18.56863200 | -5.53802100 | -1.96997800 L |
| C-C_R | -16.96870800 | -4.64304900 | -3.09263000 L |
| H-H_  | -15.49973200 | -3.44478400 | -4.11145500 L |
| N-N_R | -15.23568700 | 2.15837000  | -2.19863500 L |
| N-N_R | -16.31438000 | -5.86112100 | -3.33502900 L |
| C-C_R | -17.06434200 | -7.01000200 | -3.64918800 L |
| C-C_R | -14.90850900 | -5.93312500 | -3.27499800 L |
| C-C_R | -18.17479600 | -6.91876100 | -4.49549300 L |
| C-C_R | -16.70762800 | -8.25556100 | -3.12460200 L |
| C-C_R | -14.19914300 | -6.69810000 | -4.20464200 L |
| C-C_R | -14.20881700 | -5.23610200 | -2.28467100 L |
| H-H_  | -18.44751600 | -5.95688100 | -4.91191900 L |
| C-C_R | -18.91067600 | -8.05124400 | -4.80401200 L |
| H-H_  | -15.85475700 | -8.32873800 | -2.46092700 L |
| C-C_R | -17.44479600 | -9.38444900 | -3.44762700 L |
| H-H_  | -14.73712400 | -7.22861700 | -4.98034600 L |

|       |              |              |               |
|-------|--------------|--------------|---------------|
| C-C_R | -12.81615500 | -6.76848900  | -4.13632000 L |
| H-H_  | -14.75731000 | -4.64844600  | -1.55817100 L |
| C-C_R | -12.82547500 | -5.30205200  | -2.23492700 L |
| H-H_  | -19.76580000 | -7.96251000  | -5.46438900 L |
| C-C_R | -18.55110000 | -9.29133600  | -4.28597800 L |
| H-H_  | -17.15903600 | -10.34317500 | -3.03019800 L |
| C-C_R | -12.12019000 | -6.06924400  | -3.15538300 L |
| H-H_  | -12.27796900 | -7.36117000  | -4.86556200 L |
| H-H_  | -12.29663100 | -4.75597800  | -1.46213900 L |
| H-H_  | -19.12445300 | -10.17571500 | -4.53351700 L |
| H-H_  | -11.03873900 | -6.12059100  | -3.10995000 L |
| C-C_R | -24.34006600 | 8.45643700   | 4.93487800 L  |
| H-H_  | -24.62765700 | 7.49487900   | 5.34489900 L  |
| C-C_R | -24.83259500 | 10.75688500  | 4.45823500 L  |
| H-H_  | -25.51556200 | 11.59818300  | 4.48088200 L  |
| C-C_R | -25.22167700 | 9.52919800   | 4.98283100 L  |
| H-H_  | -26.20375000 | 9.41103500   | 5.42503800 L  |
| C-C_R | -23.07974300 | 8.60459100   | 4.37687700 L  |
| C-C_R | -22.68923600 | 9.83604400   | 3.84185100 L  |
| H-H_  | -22.38902300 | 7.76943900   | 4.35175500 L  |
| N-N_R | -21.41368800 | 9.98788500   | 3.26472900 L  |
| C-C_R | -23.58094400 | 10.91273300  | 3.88409100 L  |
| C-C_R | -20.87024000 | 8.96123800   | 2.47468700 L  |
| C-C_R | -20.68749100 | 11.17595900  | 3.46841500 L  |
| H-H_  | -23.28657000 | 11.86493600  | 3.45915400 L  |
| C-C_R | -19.50874700 | 8.65216000   | 2.55607900 L  |
| C-C_R | -21.68071900 | 8.22501100   | 1.60243800 L  |
| C-C_R | -20.68114000 | 11.79714000  | 4.72171900 L  |
| C-C_R | -19.96281100 | 11.74968400  | 2.42020000 L  |
| H-H_  | -18.88259000 | 9.18677700   | 3.26016500 L  |
| C-C_R | -18.96790100 | 7.65833800   | 1.76344300 L  |
| H-H_  | -22.73766400 | 8.45095500   | 1.53481500 L  |
| C-C_R | -21.13582200 | 7.21968000   | 0.82623600 L  |
| C-C_R | -19.97128800 | 12.97263100  | 4.91326000 L  |
| H-H_  | -21.23328500 | 11.35062100  | 5.53933600 L  |
| H-H_  | -19.97203700 | 11.27595200  | 1.44573900 L  |
| C-C_R | -19.24686700 | 12.91871100  | 2.62366100 L  |
| C-C_R | -19.76573400 | 6.93489900   | 0.86800800 L  |
| H-H_  | -17.91748900 | 7.41897300   | 1.86051400 L  |
| H-H_  | -21.76566000 | 6.63772000   | 0.16437800 L  |
| H-H_  | -19.97401100 | 13.44049500  | 5.88905100 L  |
| C-C_R | -19.24734800 | 13.53967600  | 3.86876300 L  |
| H-H_  | -18.69414600 | 13.35293600  | 1.79832700 L  |
| C-C_R | -19.23319000 | 5.83695200   | 0.04209900 L  |

|       |              |             |               |
|-------|--------------|-------------|---------------|
| H-H_  | -18.69399900 | 14.45691700 | 4.02371200 L  |
| N-N_R | -20.06261300 | 4.81575800  | -0.12788000 L |
| C-C_R | -17.92184100 | 5.79779700  | -0.51253400 L |
| N-N_R | -17.44199900 | 4.67294200  | -1.02400400 L |
| C-C_R | -17.01932600 | 6.95922800  | -0.62037800 L |
| C-C_R | -17.48698800 | 8.25447800  | -0.87447700 L |
| C-C_R | -15.63542100 | 6.75887200  | -0.55111900 L |
| C-C_R | -16.61109800 | 9.31355800  | -1.01524900 L |
| H-H_  | -18.54828900 | 8.42835000  | -0.99294800 L |
| H-H_  | -15.26507300 | 5.75319500  | -0.39509000 L |
| C-C_R | -14.75401400 | 7.81590700  | -0.67241400 L |
| H-H_  | -16.98825500 | 10.30528300 | -1.23534900 L |
| C-C_R | -15.23248500 | 9.11214400  | -0.89973200 L |
| H-H_  | -13.68825800 | 7.64664900  | -0.58752600 L |
| N-N_R | -14.34393200 | 10.19366300 | -1.01945400 L |
| C-C_R | -14.67353200 | 11.43814400 | -0.45059300 L |
| C-C_R | -13.11902100 | 10.03123500 | -1.69685300 L |
| C-C_R | -15.29340100 | 11.50142100 | 0.80037400 L  |
| C-C_R | -14.38349700 | 12.62625000 | -1.12841700 L |
| C-C_R | -11.95437800 | 10.63017200 | -1.20617000 L |
| C-C_R | -13.05541000 | 9.26734400  | -2.86558300 L |
| H-H_  | -15.51185100 | 10.58175000 | 1.33141600 L  |
| C-C_R | -15.61783600 | 12.72772600 | 1.35723900 L  |
| H-H_  | -13.91164500 | 12.58256400 | -2.10258700 L |
| C-C_R | -14.70165100 | 13.84921000 | -0.55694500 L |
| H-H_  | -11.99764900 | 11.21301200 | -0.29410500 L |
| C-C_R | -10.75426800 | 10.46971600 | -1.88039500 L |
| H-H_  | -13.95804300 | 8.80879700  | -3.25195200 L |
| C-C_R | -11.84638800 | 9.10210200  | -3.52296600 L |
| H-H_  | -16.09380500 | 12.75755800 | 2.33178700 L  |
| C-C_R | -15.32219300 | 13.90948800 | 0.68527200 L  |
| H-H_  | -14.47287900 | 14.76205700 | -1.09604200 L |
| C-C_R | -10.69115200 | 9.70398700  | -3.03988500 L |
| H-H_  | -9.85757500  | 10.93599600 | -1.48696300 L |
| H-H_  | -11.81304200 | 8.50667000  | -4.42789400 L |
| H-H_  | -15.56967400 | 14.86715400 | 1.12715300 L  |
| H-H_  | -9.74938400  | 9.57575400  | -3.55922700 L |
| C-C_R | -26.48526300 | -3.03940000 | 0.74866400 L  |
| H-H_  | -26.76052400 | -2.02761400 | 0.47167900 L  |
| C-C_R | -27.09571400 | -5.24229700 | 1.48422700 L  |
| H-H_  | -27.84690600 | -5.95634600 | 1.79932900 L  |
| C-C_R | -27.46494300 | -3.94749100 | 1.13813600 L  |
| H-H_  | -28.50598100 | -3.64824200 | 1.17068400 L  |
| C-C_R | -25.15311400 | -3.41724000 | 0.69987300 L  |

|       |              |             |               |
|-------|--------------|-------------|---------------|
| C-C_R | -24.77981200 | -4.71772600 | 1.05674300 L  |
| H-H_  | -24.39424800 | -2.71247000 | 0.38496200 L  |
| N-N_R | -23.42598700 | -5.10386900 | 1.01644600 L  |
| C-C_R | -25.76339000 | -5.62684800 | 1.45326700 L  |
| C-C_R | -22.42655400 | -4.21377500 | 1.44436800 L  |
| C-C_R | -23.07264800 | -6.38743700 | 0.55905200 L  |
| H-H_  | -25.47574100 | -6.63073800 | 1.74179400 L  |
| C-C_R | -21.20909000 | -4.13354400 | 0.75876300 L  |
| C-C_R | -22.63295400 | -3.38682100 | 2.55434100 L  |
| C-C_R | -23.72572300 | -6.95127100 | -0.54200700 L |
| C-C_R | -22.06766800 | -7.11480900 | 1.20350000 L  |
| H-H_  | -21.05851000 | -4.73748300 | -0.12814600 L |
| C-C_R | -20.21709100 | -3.27656400 | 1.19106400 L  |
| H-H_  | -23.57233300 | -3.43626300 | 3.09085900 L  |
| C-C_R | -21.64081000 | -2.51860900 | 2.97135100 L  |
| C-C_R | -23.37889600 | -8.22074900 | -0.97995700 L |
| H-H_  | -24.49676000 | -6.38661800 | -1.04922700 L |
| H-H_  | -21.56724600 | -6.68339200 | 2.06235200 L  |
| C-C_R | -21.72186400 | -8.37789200 | 0.75074900 L  |
| C-C_R | -20.40422300 | -2.46533100 | 2.31831700 L  |
| H-H_  | -19.29260400 | -3.21242800 | 0.63145300 L  |
| H-H_  | -21.80685300 | -1.86597700 | 3.81841300 L  |
| H-H_  | -23.89139800 | -8.64369100 | -1.83701400 L |
| C-C_R | -22.37580600 | -8.93999900 | -0.34146200 L |
| H-H_  | -20.94354300 | -8.93047100 | 1.26390000 L  |
| C-C_R | -19.38682400 | -1.50468500 | 2.78136200 L  |
| H-H_  | -22.10850500 | -9.93171300 | -0.68861700 L |
| N-N_R | -19.87219400 | -0.36784700 | 3.25920400 L  |
| C-C_R | -17.97922100 | -1.70778400 | 2.69658600 L  |
| C-C_R | -19.03066900 | 0.62669900  | 3.56013900 L  |
| N-N_R | -17.14222400 | -0.69946500 | 2.90034100 L  |
| C-C_R | -17.33038400 | -3.00664400 | 2.44161500 L  |
| C-C_R | -17.62812600 | 0.48321300  | 3.29073300 L  |
| C-C_R | -19.52403000 | 1.83106700  | 4.11602400 L  |
| C-C_R | -17.84702500 | -4.21497200 | 2.92663600 L  |
| C-C_R | -16.10697800 | -3.03855500 | 1.76119300 L  |
| C-C_R | -16.75821700 | 1.58480600  | 3.46718400 L  |
| C-C_R | -18.64240900 | 2.91182400  | 4.34935000 L  |
| C-C_R | -20.89850600 | 1.95251500  | 4.43883000 L  |
| C-C_R | -17.19073300 | -5.41002300 | 2.70796900 L  |
| H-H_  | -18.76051500 | -4.21210700 | 3.50849500 L  |
| H-H_  | -15.68139300 | -2.10376500 | 1.41797200 L  |
| C-C_R | -15.45272400 | -4.23268800 | 1.52225200 L  |
| C-C_R | -17.26342200 | 2.80861100  | 3.96634300 L  |

|       |              |              |               |
|-------|--------------|--------------|---------------|
| C-C_R | -15.38310300 | 1.46259500   | 3.14447700 L  |
| N-N_R | -22.02415900 | 2.05275900   | 4.70291300 L  |
| H-H_  | -17.59105800 | -6.33317000  | 3.10994700 L  |
| C-C_R | -15.99113300 | -5.43819800  | 1.98729400 L  |
| H-H_  | -14.52215800 | -4.23993200  | 0.96847000 L  |
| N-N_R | -14.25811200 | 1.36322200   | 2.88129000 L  |
| N-N_R | -15.33616800 | -6.65703400  | 1.74499400 L  |
| C-C_R | -16.08676700 | -7.80515100  | 1.43073700 L  |
| C-C_R | -13.93093500 | -6.72827300  | 1.80492600 L  |
| C-C_R | -17.19658400 | -7.71467400  | 0.58453000 L  |
| C-C_R | -15.73005300 | -9.05071000  | 1.95532200 L  |
| C-C_R | -13.22156800 | -7.49324800  | 0.87528200 L  |
| C-C_R | -13.23124200 | -6.03125000  | 2.79525300 L  |
| H-H_  | -17.46994100 | -6.75203000  | 0.16800500 L  |
| C-C_R | -17.93310100 | -8.84639300  | 0.27591300 L  |
| H-H_  | -14.87718200 | -9.12388600  | 2.61899700 L  |
| C-C_R | -16.46719600 | -10.17970400 | 1.63130400 L  |
| H-H_  | -13.75954900 | -8.02376500  | 0.09957800 L  |
| C-C_R | -11.83858100 | -7.56363800  | 0.94360500 L  |
| H-H_  | -13.77909800 | -5.44435800  | 3.52185200 L  |
| C-C_R | -11.84726300 | -6.09796500  | 2.84509600 L  |
| H-H_  | -18.78758800 | -8.75842200  | -0.38436600 L |
| C-C_R | -17.57352500 | -10.08648500 | 0.79394700 L  |
| H-H_  | -16.18082400 | -11.13908800 | 2.04982500 L  |
| C-C_R | -11.14261500 | -6.86439300  | 1.92454200 L  |
| H-H_  | -11.29975700 | -8.15708300  | 0.21446100 L  |
| H-H_  | -11.31841900 | -5.55189100  | 3.61788400 L  |
| H-H_  | -18.14687800 | -10.97086400 | 0.54640800 L  |
| H-H_  | -10.06116400 | -6.91573900  | 1.96997500 L  |
| C-C_R | -23.36185400 | 7.66052400   | 10.01490100 L |
| H-H_  | -23.65008200 | 6.69973100   | 10.42482300 L |
| C-C_R | -23.85502000 | 9.96173600   | 9.53815900 L  |
| H-H_  | -24.53798700 | 10.80303500  | 9.56080700 L  |
| C-C_R | -24.24410200 | 8.73405000   | 10.06275500 L |
| H-H_  | -25.22553800 | 8.61512300   | 10.50506100 L |
| C-C_R | -22.10153100 | 7.80867800   | 9.45690000 L  |
| C-C_R | -21.71166200 | 9.04089600   | 8.92177500 L  |
| H-H_  | -21.41144900 | 6.97429000   | 9.43168000 L  |
| N-N_R | -20.43611300 | 9.19273700   | 8.34465300 L  |
| C-C_R | -22.60336900 | 10.11758500  | 8.96401500 L  |
| C-C_R | -19.89266500 | 8.16608900   | 7.55461100 L  |
| C-C_R | -19.70927900 | 10.38004700  | 8.54843800 L  |
| H-H_  | -22.30899600 | 11.06978700  | 8.53907900 L  |
| C-C_R | -18.53117200 | 7.85701200   | 7.63600400 L  |

|       |              |             |               |
|-------|--------------|-------------|---------------|
| C-C_R | -20.70314500 | 7.42986300  | 6.68236200 L  |
| C-C_R | -19.70356500 | 11.00199100 | 9.80164300 L  |
| C-C_R | -18.98459900 | 10.95377200 | 7.50022300 L  |
| H-H_  | -17.90437800 | 8.39086500  | 8.34018800 L  |
| C-C_R | -17.99032600 | 6.86319000  | 6.84336700 L  |
| H-H_  | -21.76008900 | 7.65580600  | 6.61473900 L  |
| C-C_R | -20.15824700 | 6.42453100  | 5.90616100 L  |
| C-C_R | -18.99307600 | 12.17671900 | 9.99328300 L  |
| H-H_  | -20.25507300 | 10.55470800 | 10.61935900 L |
| H-H_  | -18.99446200 | 10.48080400 | 6.52566300 L  |
| C-C_R | -18.26865500 | 12.12279800 | 7.70368400 L  |
| C-C_R | -18.78816000 | 6.13975000  | 5.94793200 L  |
| H-H_  | -16.93927700 | 6.62306000  | 6.94053700 L  |
| H-H_  | -20.78744800 | 5.84180800  | 5.24440100 L  |
| H-H_  | -18.99643600 | 12.64534600 | 10.96897600 L |
| C-C_R | -18.26977300 | 12.74452700 | 8.94868700 L  |
| H-H_  | -17.71657100 | 12.55778800 | 6.87825100 L  |
| C-C_R | -18.25497800 | 5.04104000  | 5.12212200 L  |
| H-H_  | -17.71642400 | 13.66176900 | 9.10363600 L  |
| N-N_R | -19.08503900 | 4.02061000  | 4.95204400 L  |
| C-C_R | -16.94362900 | 5.00188400  | 4.56748900 L  |
| N-N_R | -16.46442500 | 3.87779400  | 4.05592000 L  |
| C-C_R | -16.04175100 | 6.16407900  | 4.45954700 L  |
| C-C_R | -16.50941400 | 7.45933000  | 4.20544800 L  |
| C-C_R | -14.65784600 | 5.96372300  | 4.52880500 L  |
| C-C_R | -15.63352300 | 8.51841000  | 4.06467500 L  |
| H-H_  | -17.57071400 | 7.63320200  | 4.08697600 L  |
| H-H_  | -14.28749800 | 4.95804700  | 4.68483500 L  |
| C-C_R | -13.77644000 | 7.02075900  | 4.40751100 L  |
| H-H_  | -16.01004200 | 9.50937100  | 3.84467400 L  |
| C-C_R | -14.25427300 | 8.31623100  | 4.18029100 L  |
| H-H_  | -12.71004600 | 6.85073700  | 4.49249700 L  |
| N-N_R | -13.36571900 | 9.39775000  | 4.06056900 L  |
| C-C_R | -13.69595700 | 10.64299600 | 4.62933100 L  |
| C-C_R | -12.14144700 | 9.23608700  | 3.38307200 L  |
| C-C_R | -14.31582600 | 10.70627300 | 5.88029800 L  |
| C-C_R | -13.40592200 | 11.83110100 | 3.95150700 L  |
| C-C_R | -10.97616600 | 9.83425900  | 3.87385300 L  |
| C-C_R | -12.07783500 | 8.47219500  | 2.21434200 L  |
| H-H_  | -14.53427600 | 9.78660100  | 6.41134000 L  |
| C-C_R | -14.64026100 | 11.93257700 | 6.43716300 L  |
| H-H_  | -12.93343300 | 11.78665100 | 2.97743600 L  |
| C-C_R | -13.72343900 | 13.05329700 | 4.52307800 L  |
| H-H_  | -11.01943700 | 10.41710000 | 4.78591800 L  |

|       |              |             |              |
|-------|--------------|-------------|--------------|
| C-C_R | -9.77666800  | 9.67446000  | 3.19853500 L |
| H-H_  | -12.97983100 | 8.01288500  | 1.82807100 L |
| C-C_R | -10.86881300 | 8.30695300  | 1.55695900 L |
| H-H_  | -15.11620500 | 11.96230300 | 7.41071800 L |
| C-C_R | -14.34398100 | 13.11357500 | 5.76529500 L |
| H-H_  | -13.49530400 | 13.96690800 | 3.98388300 L |
| C-C_R | -9.71357700  | 8.90883900  | 2.04003900 L |
| H-H_  | -8.88000100  | 10.14084800 | 3.59296200 L |
| H-H_  | -10.83483000 | 7.71075700  | 0.65212900 L |
| H-H_  | -14.59210000 | 14.07200500 | 6.20707700 L |
| H-H_  | -8.77117200  | 8.77984200  | 1.52079600 L |
| C-C_R | -25.50768800 | -3.83454900 | 5.82858900 L |
| H-H_  | -25.78231200 | -2.82352700 | 5.55170200 L |
| C-C_R | -26.11750200 | -6.03821000 | 6.56425000 L |
| H-H_  | -26.86933100 | -6.75149400 | 6.87925300 L |
| C-C_R | -26.48670500 | -4.74351100 | 6.21716500 L |
| H-H_  | -27.52776900 | -4.44415500 | 6.25070700 L |
| C-C_R | -24.17487700 | -4.21326000 | 5.77890300 L |
| C-C_R | -23.80223800 | -5.51287500 | 6.13666700 L |
| H-H_  | -23.41667300 | -3.50761800 | 5.46488600 L |
| N-N_R | -22.44777500 | -5.89978200 | 6.09646900 L |
| C-C_R | -24.78581500 | -6.42199600 | 6.53319200 L |
| C-C_R | -21.44897900 | -5.00892400 | 6.52429200 L |
| C-C_R | -22.09507300 | -7.18258600 | 5.63897600 L |
| H-H_  | -24.49752900 | -7.42665100 | 6.82181700 L |
| C-C_R | -20.23087800 | -4.92945700 | 5.83878600 L |
| C-C_R | -21.65474200 | -4.18273400 | 7.63436400 L |
| C-C_R | -22.74814800 | -7.74642000 | 4.53791800 L |
| C-C_R | -21.09009300 | -7.90995800 | 6.28342500 L |
| H-H_  | -20.08093500 | -5.53263100 | 4.95177800 L |
| C-C_R | -19.23951600 | -4.07171300 | 6.27098900 L |
| H-H_  | -22.59475900 | -4.23141200 | 8.17078300 L |
| C-C_R | -20.66323500 | -3.31375800 | 8.05127500 L |
| C-C_R | -22.40132100 | -9.01589800 | 4.09996700 L |
| H-H_  | -23.51918600 | -7.18176600 | 4.03069700 L |
| H-H_  | -20.58903400 | -7.47930500 | 7.14237500 L |
| C-C_R | -20.74426400 | -9.17314800 | 5.82968000 L |
| C-C_R | -19.42664900 | -3.26047900 | 7.39824200 L |
| H-H_  | -18.31503000 | -4.00757700 | 5.71137700 L |
| H-H_  | -20.82927800 | -2.66112600 | 8.89833700 L |
| H-H_  | -22.91318600 | -9.43960300 | 3.24300900 L |
| C-C_R | -21.39759400 | -9.73591100 | 4.73856100 L |
| H-H_  | -19.96596800 | -9.72562000 | 6.34382500 L |
| C-C_R | -18.40861100 | -2.30059800 | 7.86138500 L |



|       |              |              |              |
|-------|--------------|--------------|--------------|
| H-H_  | -21.13093000 | -10.72686100 | 4.39130700 L |
| N-N_R | -18.89461900 | -1.16299600  | 8.33912800 L |
| C-C_R | -17.00100900 | -2.50369600  | 7.77660900 L |
| C-C_R | -18.05309400 | -0.16845000  | 8.64006300 L |
| N-N_R | -16.16464900 | -1.49461400  | 7.98026500 L |
| C-C_R | -16.35217200 | -3.80255700  | 7.52163800 L |
| C-C_R | -16.64991400 | -0.31270000  | 8.37075600 L |
| C-C_R | -18.54581800 | 1.03515500   | 9.19604700 L |
| C-C_R | -16.86945000 | -5.01012100  | 8.00656100 L |
| C-C_R | -15.12940300 | -3.83370300  | 6.84111800 L |
| C-C_R | -15.78000500 | 0.78889400   | 8.54720700 L |
| C-C_R | -17.66483400 | 2.11667600   | 9.42927400 L |
| C-C_R | -19.92093200 | 1.15736600   | 9.51875400 L |
| C-C_R | -16.21252100 | -6.20593500  | 7.78799200 L |
| H-H_  | -17.78294100 | -5.00725500  | 8.58841900 L |
| H-H_  | -14.70381900 | -2.89891400  | 6.49789700 L |
| C-C_R | -14.47514900 | -5.02783700  | 6.60217700 L |
| C-C_R | -16.28520900 | 2.01269900   | 9.04636600 L |
| C-C_R | -14.40552800 | 0.66744700   | 8.22440200 L |
| N-N_R | -21.04655900 | 1.25750400   | 9.78184300 L |
| H-H_  | -16.61348300 | -7.12831800  | 8.18987100 L |
| C-C_R | -15.01355800 | -6.23334600  | 7.06721900 L |
| H-H_  | -13.54458300 | -5.03508100  | 6.04839400 L |
| N-N_R | -13.27990000 | 0.56730900   | 7.96131300 L |
| N-N_R | -14.35859300 | -7.45218200  | 6.82491900 L |
| C-C_R | -15.10855500 | -8.60106300  | 6.51076000 L |
| C-C_R | -12.95272300 | -7.52418600  | 6.88494900 L |
| C-C_R | -16.21900900 | -8.50982200  | 5.66445500 L |
| C-C_R | -14.75184100 | -9.84662200  | 7.03534500 L |
| C-C_R | -12.24335600 | -8.28916100  | 5.95530500 L |
| C-C_R | -12.25303000 | -6.82716300  | 7.87527600 L |
| H-H_  | -16.49236700 | -7.54717800  | 5.24793000 L |
| C-C_R | -16.95552600 | -9.64154100  | 5.35583700 L |
| H-H_  | -13.89897000 | -9.91979900  | 7.69902000 L |
| C-C_R | -15.48962100 | -10.97485300 | 6.71122800 L |
| H-H_  | -12.78131100 | -8.81978500  | 5.17860700 L |
| C-C_R | -10.86036900 | -8.35955000  | 6.02362800 L |
| H-H_  | -12.80152300 | -6.23950700  | 8.60177600 L |
| C-C_R | -10.86968800 | -6.89311300  | 7.92502100 L |
| H-H_  | -17.81001300 | -9.55357100  | 4.69555800 L |
| C-C_R | -16.59595000 | -10.88163300 | 5.87387100 L |
| H-H_  | -15.20324900 | -11.93423600 | 7.12974900 L |
| C-C_R | -10.16501500 | -7.65964800  | 7.00347200 L |
| H-H_  | -10.32215700 | -8.95233800  | 5.29339200 L |

|       |              |              |               |
|-------|--------------|--------------|---------------|
| H-H_  | -10.34081900 | -6.34714600  | 8.69681500 L  |
| H-H_  | -17.16866600 | -11.76677600 | 5.62643100 L  |
| H-H_  | -9.08295200  | -7.71165200  | 7.04999800 L  |
| C-C_R | -22.38427900 | 6.86537600   | 15.09482600 L |
| H-H_  | -22.67250700 | 5.90458300   | 15.50474700 L |
| C-C_R | -22.87680800 | 9.16582400   | 14.61818200 L |
| H-H_  | -23.56038700 | 10.00778000  | 14.63973700 L |
| C-C_R | -23.26652800 | 7.93890100   | 15.14268000 L |
| H-H_  | -24.24796300 | 7.81997400   | 15.58498500 L |
| C-C_R | -21.12395600 | 7.01353000   | 14.53682400 L |
| C-C_R | -20.73408700 | 8.24574700   | 14.00170000 L |
| H-H_  | -20.43387400 | 6.17914200   | 14.51160400 L |
| N-N_R | -19.45853900 | 8.39758800   | 13.42457800 L |
| C-C_R | -21.62515700 | 9.32167200   | 14.04403800 L |
| C-C_R | -18.91506500 | 7.37083400   | 12.63354200 L |
| C-C_R | -18.73170400 | 9.58489800   | 13.62836300 L |
| H-H_  | -21.33078400 | 10.27387500  | 13.61910200 L |
| C-C_R | -17.55296000 | 7.06109900   | 12.71602700 L |
| C-C_R | -19.72493300 | 6.63395000   | 11.76238500 L |
| C-C_R | -18.72535300 | 10.20607900  | 14.88166600 L |
| C-C_R | -18.00702400 | 10.15862300  | 12.58014800 L |
| H-H_  | -16.92680400 | 7.59571600   | 13.42011300 L |
| C-C_R | -17.01275200 | 6.06804100   | 11.92329200 L |
| H-H_  | -20.78187700 | 6.85989400   | 11.69476200 L |
| C-C_R | -19.18067200 | 5.62938300   | 10.98608500 L |
| C-C_R | -18.01550100 | 11.38157000  | 15.07320700 L |
| H-H_  | -19.27749800 | 9.75956000   | 15.69928400 L |
| H-H_  | -18.01625000 | 9.68489100   | 11.60568600 L |
| C-C_R | -17.29108000 | 11.32765000  | 12.78360900 L |
| C-C_R | -17.80994800 | 5.34383800   | 11.02795500 L |
| H-H_  | -15.96170200 | 5.82791200   | 12.02046100 L |
| H-H_  | -19.80987300 | 5.04665900   | 10.32432500 L |
| H-H_  | -18.01822400 | 11.84943400  | 16.04899900 L |
| C-C_R | -17.29219900 | 11.94937900  | 14.02861200 L |
| H-H_  | -16.73835900 | 11.76187500  | 11.95827500 L |
| C-C_R | -17.27740300 | 4.24589100   | 10.20204600 L |
| H-H_  | -16.73821200 | 12.86585600  | 14.18365900 L |
| N-N_R | -18.10746400 | 3.22546100   | 10.03196900 L |
| C-C_R | -15.96605400 | 4.20673600   | 9.64741300 L  |
| N-N_R | -15.48621300 | 3.08188100   | 9.13594300 L  |
| C-C_R | -15.06417700 | 5.36893100   | 9.53947100 L  |
| C-C_R | -15.53117600 | 6.66331000   | 9.28447700 L  |
| C-C_R | -13.68024600 | 5.16846800   | 9.60773600 L  |
| C-C_R | -14.65592300 | 7.72315400   | 9.14360600 L  |

|       |              |             |                |
|-------|--------------|-------------|----------------|
| H-H_  | -16.59314000 | 6.83805300  | 9.16690100 L   |
| H-H_  | -13.30992300 | 4.16289800  | 9.76475900 L   |
| C-C_R | -12.79820200 | 6.22473900  | 9.48654000 L   |
| H-H_  | -15.03246800 | 8.71422200  | 8.92459900 L   |
| C-C_R | -13.27669900 | 7.52108300  | 9.26021600 L   |
| H-H_  | -11.73247100 | 6.05558900  | 9.57242200 L   |
| N-N_R | -12.38814500 | 8.60260200  | 9.14049400 L   |
| C-C_R | -12.71774500 | 9.84708300  | 9.70935500 L   |
| C-C_R | -11.16323500 | 8.44017400  | 8.46309500 L   |
| C-C_R | -13.33761400 | 9.91036000  | 10.96032100 L  |
| C-C_R | -12.42834700 | 11.03595300 | 9.03143100 L   |
| C-C_R | -9.99859100  | 9.03911100  | 8.95377700 L   |
| C-C_R | -11.09962300 | 7.67628300  | 7.29436500 L   |
| H-H_  | -13.55670100 | 8.99145300  | 11.49126500 L  |
| C-C_R | -13.66268700 | 11.13742900 | 11.51708800 L  |
| H-H_  | -11.95585800 | 10.99150300 | 8.05736100 L   |
| C-C_R | -12.74586400 | 12.25814900 | 9.60300200 L   |
| H-H_  | -10.04186300 | 9.62195100  | 9.86584200 L   |
| C-C_R | -8.79909300  | 8.87931200  | 8.27845900 L   |
| H-H_  | -12.00225600 | 7.21773600  | 6.90799500 L   |
| C-C_R | -9.89123800  | 7.51180500  | 6.63688300 L   |
| H-H_  | -14.13863000 | 11.16715500 | 12.49064200 L  |
| C-C_R | -13.36640600 | 12.31842700 | 10.84522000 L  |
| H-H_  | -12.51709200 | 13.17099600 | 9.06390600 L   |
| C-C_R | -8.73600200  | 8.11369000  | 7.11996400 L   |
| H-H_  | -7.90242600  | 9.34569900  | 8.67288600 L   |
| H-H_  | -9.85725500  | 6.91560900  | 5.73205400 L   |
| H-H_  | -13.61388700 | 13.27609300 | 11.28710000 L  |
| H-H_  | -7.79359700  | 7.98469300  | 6.60072100 L   |
| C-C_R | -7.64886200  | 15.72298600 | -10.72374900 L |
| H-H_  | -7.92346100  | 16.73390100 | -11.00162900 L |
| C-C_R | -8.25790600  | 13.51996000 | -9.98813600 L  |
| H-H_  | -9.01048000  | 12.80593300 | -9.67407800 L  |
| C-C_R | -8.62788000  | 14.81402400 | -10.33517300 L |
| H-H_  | -9.66814800  | 15.11390900 | -10.30267300 L |
| C-C_R | -6.31605100  | 15.34427500 | -10.77343500 L |
| C-C_R | -5.94338700  | 14.04455300 | -10.41666400 L |
| H-H_  | -5.55705200  | 16.05044500 | -11.08849400 L |
| N-N_R | -4.58815400  | 13.65828200 | -10.45691100 L |
| C-C_R | -6.92696400  | 13.13543100 | -10.02014000 L |
| C-C_R | -3.59012800  | 14.54850400 | -10.02903900 L |
| C-C_R | -4.23547800  | 12.37558500 | -10.91341000 L |
| H-H_  | -6.63867800  | 12.13077600 | -9.73151400 L  |
| C-C_R | -2.37202700  | 14.62797100 | -10.71454500 L |

|       |             |             |                |
|-------|-------------|-------------|----------------|
| C-C_R | -3.79512100 | 15.37532900 | -8.91901600 L  |
| C-C_R | -4.88852700 | 11.81164400 | -12.01546200 L |
| C-C_R | -3.23124200 | 11.64747000 | -10.26990600 L |
| H-H_  | -2.22131400 | 14.02543200 | -11.60160200 L |
| C-C_R | -1.38069100 | 15.48582200 | -10.28134900 L |
| H-H_  | -4.73513800 | 15.32665200 | -8.38259700 L  |
| C-C_R | -2.80438400 | 16.24367000 | -8.50205600 L  |
| C-C_R | -4.54247000 | 10.54153000 | -12.45336400 L |
| H-H_  | -5.66033500 | 12.37566100 | -12.52263400 L |
| H-H_  | -2.73018300 | 12.07812300 | -9.41095600 L  |
| C-C_R | -2.88543800 | 10.38438700 | -10.72265800 L |
| C-C_R | -1.56779800 | 16.29694800 | -9.15509000 L  |
| H-H_  | -0.45620400 | 15.54995800 | -10.84096000 L |
| H-H_  | -2.96965700 | 16.89693800 | -7.65504300 L  |
| H-H_  | -5.05356500 | 10.11846000 | -13.31037100 L |
| C-C_R | -3.53874300 | 9.82151600  | -11.81477000 L |
| H-H_  | -2.10634700 | 9.83244400  | -10.20955500 L |
| C-C_R | -0.54899000 | 17.25746500 | -8.69199500 L  |
| H-H_  | -3.27207900 | 8.83056600  | -12.16202400 L |
| N-N_R | -1.03499800 | 18.39506800 | -8.21425100 L  |
| C-C_R | 0.85858700  | 17.05447400 | -8.77577700 L  |
| C-C_R | -0.19347300 | 19.38961400 | -7.91331700 L  |
| N-N_R | 1.69420200  | 18.06281400 | -8.57306600 L  |
| C-C_R | 1.50667900  | 15.75487100 | -9.03169300 L  |
| C-C_R | 1.20891200  | 19.24483500 | -8.18158100 L  |
| C-C_R | -0.68696700 | 20.59258200 | -7.35728400 L  |
| C-C_R | 0.99017100  | 14.54794300 | -8.54681900 L  |
| C-C_R | 2.72944800  | 15.72372400 | -9.71221400 L  |
| C-C_R | 2.07961600  | 20.34695700 | -8.00617200 L  |
| C-C_R | 0.19476100  | 21.67484600 | -7.12311200 L  |
| C-C_R | -2.06131000 | 20.71543000 | -7.03462600 L  |
| C-C_R | 1.64633000  | 13.35149200 | -8.76533900 L  |
| H-H_  | 0.07591000  | 14.55017200 | -7.96491200 L  |
| H-H_  | 3.15503200  | 16.65851400 | -10.05543500 L |
| C-C_R | 3.38447200  | 14.53022700 | -9.95120300 L  |
| C-C_R | 1.57441200  | 21.57076200 | -7.50701400 L  |
| C-C_R | 3.45329700  | 20.22498100 | -8.32793600 L  |
| N-N_R | -3.18696400 | 20.81567400 | -6.77054300 L  |
| H-H_  | 1.24613800  | 12.42974500 | -8.36350900 L  |
| C-C_R | 2.84606300  | 13.32471700 | -9.48616100 L  |
| H-H_  | 4.31426800  | 14.52234700 | -10.50493700 L |
| N-N_R | 4.57895100  | 20.12473700 | -8.59201900 L  |
| N-N_R | 3.50025800  | 12.10524500 | -9.72841300 L  |
| C-C_R | 2.75029600  | 10.95636400 | -10.04257100 L |

|       |             |             |                |
|-------|-------------|-------------|----------------|
| C-C_R | 4.90612800  | 12.03324200 | -9.66838200 L  |
| C-C_R | 1.64061200  | 11.04824100 | -10.88892500 L |
| C-C_R | 3.10701000  | 9.71080500  | -9.51798600 L  |
| C-C_R | 5.61626500  | 11.26890300 | -10.59807500 L |
| C-C_R | 5.60582100  | 12.73026500 | -8.67805500 L  |
| H-H_  | 1.36725500  | 12.01088500 | -11.30545000 L |
| C-C_R | 0.90329900  | 9.91599300  | -11.19650000 L |
| H-H_  | 3.96065100  | 9.63826500  | -8.85436000 L  |
| C-C_R | 2.36920400  | 8.58268200  | -9.84110900 L  |
| H-H_  | 5.07751400  | 10.73774900 | -11.37373000 L |
| C-C_R | 6.99925300  | 11.19851300 | -10.52975200 L |
| H-H_  | 5.05809800  | 13.31855700 | -7.95160400 L  |
| C-C_R | 6.98993300  | 12.66495000 | -8.62835900 L  |
| H-H_  | 0.04883800  | 10.00385700 | -11.85777300 L |
| C-C_R | 1.26290100  | 8.67579400  | -10.67946000 L |
| H-H_  | 2.65637200  | 7.62382700  | -9.42363100 L  |
| C-C_R | 7.69381100  | 11.89788600 | -9.54886500 L  |
| H-H_  | 7.53743800  | 10.60583200 | -11.25899400 L |
| H-H_  | 7.51877700  | 13.21102400 | -7.85557100 L  |
| H-H_  | 0.69018500  | 7.79065100  | -10.92690100 L |
| H-H_  | 8.77589900  | 11.84577600 | -9.50333300 L  |
| C-C_R | -4.52465800 | 26.42343900 | -1.45855400 L  |
| H-H_  | -4.81365600 | 25.46201000 | -1.04858400 L  |
| C-C_R | -5.01718700 | 28.72388700 | -1.93519800 L  |
| H-H_  | -5.70079100 | 29.56595000 | -1.91264900 L  |
| C-C_R | -5.40690700 | 27.49696500 | -1.41070000 L  |
| H-H_  | -6.38911200 | 27.37740200 | -0.96834600 L  |
| C-C_R | -3.26510500 | 26.57095700 | -2.01650700 L  |
| C-C_R | -2.87523600 | 27.80317500 | -2.55163100 L  |
| H-H_  | -2.57425300 | 25.73720500 | -2.04177600 L  |
| N-N_R | -1.59891800 | 27.95565200 | -3.12880200 L  |
| C-C_R | -3.76630600 | 28.87909900 | -2.50929300 L  |
| C-C_R | -1.05624000 | 26.92836800 | -3.91879600 L  |
| C-C_R | -0.87208300 | 29.14296200 | -2.92501700 L  |
| H-H_  | -3.47193300 | 29.83130200 | -2.93423000 L  |
| C-C_R | 0.30589100  | 26.61852600 | -3.83730500 L  |
| C-C_R | -1.86608200 | 26.19137800 | -4.79094600 L  |
| C-C_R | -0.86650200 | 29.76350600 | -1.67166500 L  |
| C-C_R | -0.14740300 | 29.71668700 | -3.97323200 L  |
| H-H_  | 0.93204700  | 27.15314400 | -3.13321900 L  |
| C-C_R | 0.84607400  | 25.62557600 | -4.62904600 L  |
| H-H_  | -2.92228100 | 26.41806400 | -4.85762400 L  |
| C-C_R | -1.32105100 | 25.18744600 | -5.56729500 L  |
| C-C_R | -0.15588000 | 30.93963400 | -1.48017300 L  |

|       |             |             |               |
|-------|-------------|-------------|---------------|
| H-H_  | -1.41864700 | 29.31698700 | -0.85404800 L |
| H-H_  | -0.15742500 | 29.24242500 | -4.94665100 L |
| C-C_R | 0.56851600  | 30.88582000 | -3.76877700 L |
| C-C_R | 0.04967400  | 24.90190100 | -5.52542500 L |
| H-H_  | 1.89712300  | 25.38544600 | -4.53187600 L |
| H-H_  | -1.95027800 | 24.60483000 | -6.22806100 L |
| H-H_  | -0.15862900 | 31.40760400 | -0.50338700 L |
| C-C_R | 0.56665200  | 31.50680600 | -2.52472000 L |
| H-H_  | 1.12046600  | 31.31941000 | -4.59406300 L |
| C-C_R | 0.58144800  | 23.80331800 | -6.35128500 L |
| H-H_  | 1.12138400  | 32.42402700 | -2.36872700 L |
| N-N_R | -0.24861300 | 22.78288900 | -6.52136300 L |
| C-C_R | 1.89356700  | 23.76479900 | -6.90596700 L |
| N-N_R | 2.37263800  | 22.63930800 | -7.41738800 L |
| C-C_R | 2.79467400  | 24.92635800 | -7.01386000 L |
| C-C_R | 2.32842000  | 26.22148100 | -7.26790900 L |
| C-C_R | 4.17921700  | 24.72523800 | -6.94450300 L |
| C-C_R | 3.20290300  | 27.28068900 | -7.40873200 L |
| H-H_  | 1.26571100  | 26.39548100 | -7.38643000 L |
| H-H_  | 4.54892800  | 23.72032600 | -6.78857200 L |
| C-C_R | 5.06139400  | 25.78290900 | -7.06584600 L |
| H-H_  | 2.82715300  | 28.27228600 | -7.62878100 L |
| C-C_R | 4.58292300  | 27.07914600 | -7.29316400 L |
| H-H_  | 6.12715000  | 25.61365200 | -6.98095800 L |
| N-N_R | 5.47070600  | 28.16002900 | -7.41283800 L |
| C-C_R | 5.14187600  | 29.40514700 | -6.84402500 L |
| C-C_R | 6.69559100  | 27.99770900 | -8.08924300 L |
| C-C_R | 4.52123700  | 29.46778800 | -5.59301000 L |
| C-C_R | 5.43127400  | 30.59401600 | -7.52194900 L |
| C-C_R | 7.86026000  | 28.59653800 | -7.59955400 L |
| C-C_R | 6.75999800  | 27.23434600 | -9.25901500 L |
| H-H_  | 4.30292000  | 28.54951600 | -5.06211500 L |
| C-C_R | 4.19616400  | 30.69485600 | -5.03624400 L |
| H-H_  | 5.90299300  | 30.54893000 | -8.49597000 L |
| C-C_R | 5.11298700  | 31.81557600 | -6.95032900 L |
| H-H_  | 7.81698800  | 29.17937900 | -6.68748900 L |
| C-C_R | 9.05973300  | 28.43684600 | -8.27387800 L |
| H-H_  | 5.85659500  | 26.77516400 | -9.64533600 L |
| C-C_R | 7.96761300  | 27.06923200 | -9.91644800 L |
| H-H_  | 3.72019600  | 30.72468900 | -4.06169500 L |
| C-C_R | 4.49242000  | 31.87596100 | -5.70711800 L |
| H-H_  | 5.34250300  | 32.72916600 | -7.48848000 L |
| C-C_R | 9.12361900  | 27.67175400 | -9.43341600 L |
| H-H_  | 9.95642500  | 28.90312700 | -7.88044500 L |

|       |             |             |                |
|-------|-------------|-------------|----------------|
| H-H_  | 8.00159600  | 26.47303600 | -10.82127800 L |
| H-H_  | 4.24496400  | 32.83352000 | -5.26623100 L  |
| H-H_  | 10.06525400 | 27.54212100 | -9.95261000 L  |
| C-C_R | -6.67065000 | 14.92707300 | -5.64372600 L  |
| H-H_  | -6.94588700 | 15.93875200 | -5.92170500 L  |
| C-C_R | -7.28030600 | 12.72470500 | -4.90920500 L  |
| H-H_  | -8.03226800 | 12.01002100 | -4.59405500 L  |
| C-C_R | -7.65030500 | 14.01887500 | -5.25524800 L  |
| H-H_  | -8.69057400 | 14.31876000 | -5.22274900 L  |
| C-C_R | -5.33847700 | 14.54912600 | -5.69351000 L  |
| C-C_R | -4.96517500 | 13.24864000 | -5.33664100 L  |
| H-H_  | -4.57947700 | 15.25529700 | -6.00856900 L  |
| N-N_R | -3.61057900 | 12.86313300 | -5.37698600 L  |
| C-C_R | -5.94875200 | 12.33951900 | -4.94011700 L  |
| C-C_R | -2.61191600 | 13.75259100 | -4.94901600 L  |
| C-C_R | -3.25724000 | 11.57956500 | -5.83438100 L  |
| H-H_  | -5.66110300 | 11.33562800 | -4.65159000 L  |
| C-C_R | -1.39445200 | 13.83282200 | -5.63462100 L  |
| C-C_R | -2.81754700 | 14.58018100 | -3.83909200 L  |
| C-C_R | -3.91031500 | 11.01573100 | -6.93543900 L  |
| C-C_R | -2.25303000 | 10.85155700 | -5.18988300 L  |
| H-H_  | -1.24310200 | 13.22952000 | -6.52157900 L  |
| C-C_R | -0.40311600 | 14.69067300 | -5.20142400 L  |
| H-H_  | -3.75692500 | 14.53073900 | -3.30257400 L  |
| C-C_R | -1.82617200 | 15.44775700 | -3.42203300 L  |
| C-C_R | -3.56489500 | 9.74638100  | -7.37344000 L  |
| H-H_  | -4.68276000 | 11.58051300 | -7.44271000 L  |
| H-H_  | -1.75260800 | 11.28297400 | -4.33103200 L  |
| C-C_R | -1.90722600 | 9.58847400  | -5.64263500 L  |
| C-C_R | -0.58958600 | 15.50103500 | -4.07506700 L  |
| H-H_  | 0.52200800  | 14.75404500 | -5.76093700 L  |
| H-H_  | -1.99208200 | 16.10178900 | -2.57511900 L  |
| H-H_  | -4.07599000 | 9.32331200  | -8.23044700 L  |
| C-C_R | -2.56116800 | 9.02636800  | -6.73484600 L  |
| H-H_  | -1.12877200 | 9.03729500  | -5.12963100 L  |
| C-C_R | 0.42858400  | 16.46231700 | -3.61207000 L  |
| H-H_  | -2.29450400 | 8.03541800  | -7.08210000 L  |
| N-N_R | -0.05742300 | 17.59991900 | -3.13432700 L  |
| C-C_R | 1.83618700  | 16.25921900 | -3.69684700 L  |
| C-C_R | 0.78473900  | 18.59370100 | -2.83329400 L  |
| N-N_R | 2.67241400  | 17.26690100 | -3.49304300 L  |
| C-C_R | 2.48425400  | 14.95972200 | -3.95176900 L  |
| C-C_R | 2.18651200  | 18.44957900 | -3.10265100 L  |
| C-C_R | 0.29060800  | 19.79743400 | -2.27736000 L  |

|       |             |             |               |
|-------|-------------|-------------|---------------|
| C-C_R | 1.96838300  | 13.75203000 | -3.46679600 L |
| C-C_R | 3.70702300  | 14.92857600 | -4.63228900 L |
| C-C_R | 3.05719100  | 19.55180900 | -2.92624800 L |
| C-C_R | 1.17297300  | 20.87893400 | -2.04308900 L |
| C-C_R | -1.08373600 | 19.92028100 | -1.95470100 L |
| C-C_R | 2.62390500  | 12.55634400 | -3.68541500 L |
| H-H_  | 1.05412200  | 13.75426000 | -2.88488900 L |
| H-H_  | 4.13260700  | 15.86336500 | -4.97551000 L |
| C-C_R | 4.36204600  | 13.73507800 | -4.87127900 L |
| C-C_R | 2.55198600  | 20.77561400 | -2.42709000 L |
| C-C_R | 4.43150900  | 19.42906800 | -3.24791300 L |
| N-N_R | -2.20875200 | 20.01976100 | -1.69052000 L |
| H-H_  | 2.22435000  | 11.63383300 | -3.28348600 L |
| C-C_R | 3.82427500  | 12.52880500 | -4.40613800 L |
| H-H_  | 5.29248000  | 13.72643400 | -5.42491400 L |
| N-N_R | 5.55652500  | 19.32958800 | -3.51209400 L |
| N-N_R | 4.47783200  | 11.31009700 | -4.64848800 L |
| C-C_R | 3.72787100  | 10.16121500 | -4.96264700 L |
| C-C_R | 5.88370300  | 11.23809300 | -4.58845800 L |
| C-C_R | 2.61818700  | 10.25309300 | -5.80900100 L |
| C-C_R | 4.08458400  | 8.91565700  | -4.43806200 L |
| C-C_R | 6.59383900  | 10.47375400 | -5.51815100 L |
| C-C_R | 6.58339500  | 11.93511600 | -3.59813100 L |
| H-H_  | 2.34546700  | 11.21497300 | -6.22542700 L |
| C-C_R | 1.88153700  | 9.11997400  | -6.11747100 L |
| H-H_  | 4.93822600  | 8.84311600  | -3.77443500 L |
| C-C_R | 3.34741600  | 7.78676900  | -4.76108600 L |
| H-H_  | 6.05508900  | 9.94260100  | -6.29380600 L |
| C-C_R | 7.97682700  | 10.40336500 | -5.44982800 L |
| H-H_  | 6.03567300  | 12.52340800 | -2.87168000 L |
| C-C_R | 7.96750800  | 11.86980200 | -3.54843500 L |
| H-H_  | 1.02641300  | 9.20870800  | -6.77784900 L |
| C-C_R | 2.24111300  | 7.87988200  | -5.59943700 L |
| H-H_  | 3.63394600  | 6.82867900  | -4.34370600 L |
| C-C_R | 8.67202300  | 11.10197400 | -4.46884200 L |
| H-H_  | 8.51501300  | 9.81068400  | -6.17907000 L |
| H-H_  | 8.49635200  | 12.41587600 | -2.77564700 L |
| H-H_  | 1.66775900  | 6.99550300  | -5.84697600 L |
| H-H_  | 9.75347400  | 11.05062700 | -4.42340900 L |
| C-C_R | -3.54708300 | 25.62829100 | 3.62137000 L  |
| H-H_  | -3.83544400 | 24.66609700 | 4.03143900 L  |
| C-C_R | -4.03961200 | 27.92873900 | 3.14472700 L  |
| H-H_  | -4.72257900 | 28.77003700 | 3.16737400 L  |
| C-C_R | -4.42869400 | 26.70105200 | 3.66932300 L  |



|       |             |             |               |
|-------|-------------|-------------|---------------|
| H-H_  | -5.41153800 | 26.58225300 | 4.11157800 L  |
| C-C_R | -2.28753000 | 25.77580900 | 3.06341700 L  |
| C-C_R | -1.89702400 | 27.00726200 | 2.52839200 L  |
| H-H_  | -1.59604100 | 24.94129300 | 3.03824700 L  |
| N-N_R | -0.62070500 | 27.15973900 | 1.95122100 L  |
| C-C_R | -2.78873100 | 28.08395100 | 2.57063100 L  |
| C-C_R | -0.07802800 | 26.13245600 | 1.16122700 L  |
| C-C_R | 0.10549100  | 28.34781300 | 2.15490700 L  |
| H-H_  | -2.49435800 | 29.03615400 | 2.14569500 L  |
| C-C_R | 1.28346500  | 25.82337800 | 1.24262000 L  |
| C-C_R | -0.88850700 | 25.39622900 | 0.28897800 L  |
| C-C_R | 0.11107300  | 28.96835800 | 3.40825900 L  |
| C-C_R | 0.83017200  | 28.92153800 | 1.10669200 L  |
| H-H_  | 1.90962200  | 26.35799500 | 1.94670600 L  |
| C-C_R | 1.82431200  | 24.82955600 | 0.44998300 L  |
| H-H_  | -1.94468100 | 25.62280900 | 0.22130600 L  |
| C-C_R | -0.34283900 | 24.39153400 | -0.48727200 L |
| C-C_R | 0.82169500  | 30.14448500 | 3.59975200 L  |
| H-H_  | -0.44107200 | 28.52183900 | 4.22587700 L  |
| H-H_  | 0.82017500  | 28.44717000 | 0.13228000 L  |
| C-C_R | 1.54611600  | 30.09056500 | 1.31015300 L  |
| C-C_R | 1.02724800  | 24.10675300 | -0.44550000 L |
| H-H_  | 2.87472400  | 24.59019100 | 0.54705400 L  |
| H-H_  | -0.97267800 | 23.80957400 | -1.14913000 L |
| H-H_  | 0.81897200  | 30.61234900 | 4.57554300 L  |
| C-C_R | 1.54486500  | 30.71089400 | 2.55530400 L  |
| H-H_  | 2.09806700  | 30.52415400 | 0.48486800 L  |
| C-C_R | 1.55902300  | 23.00817000 | -1.27136100 L |
| H-H_  | 2.09898400  | 31.62877100 | 2.71020400 L  |
| N-N_R | 0.72959900  | 21.98697600 | -1.44134000 L |
| C-C_R | 2.87114100  | 22.96965100 | -1.82604300 L |
| N-N_R | 3.35021300  | 21.84416000 | -2.33746300 L |
| C-C_R | 3.77288700  | 24.13044600 | -1.93383700 L |
| C-C_R | 3.30599400  | 25.42633200 | -2.18798500 L |
| C-C_R | 5.15679200  | 23.93009000 | -1.86457900 L |
| C-C_R | 4.18111500  | 26.48477600 | -2.32870900 L |
| H-H_  | 2.24392300  | 25.59956800 | -2.30640700 L |
| H-H_  | 5.52714000  | 22.92441300 | -1.70854900 L |
| C-C_R | 6.03896800  | 24.98776100 | -1.98592200 L |
| H-H_  | 3.80472800  | 27.47713700 | -2.54885700 L |
| C-C_R | 5.56049700  | 26.28399800 | -2.21324000 L |
| H-H_  | 7.10472500  | 24.81850300 | -1.90103400 L |
| N-N_R | 6.44828100  | 27.36488100 | -2.33291300 L |
| C-C_R | 6.11945100  | 28.60999800 | -1.76410100 L |

|       |             |             |               |
|-------|-------------|-------------|---------------|
| C-C_R | 7.67319100  | 27.20245300 | -3.01031200 L |
| C-C_R | 5.49881200  | 28.67263900 | -0.51308600 L |
| C-C_R | 6.40948600  | 29.79810400 | -2.44192600 L |
| C-C_R | 8.83783500  | 27.80139000 | -2.51963000 L |
| C-C_R | 7.73757300  | 26.43919800 | -4.17909100 L |
| H-H_  | 5.28113200  | 27.75360400 | 0.01790800 L  |
| C-C_R | 5.17437600  | 29.89894400 | 0.04378000 L  |
| H-H_  | 6.88056800  | 29.75378200 | -3.41604600 L |
| C-C_R | 6.09056200  | 31.02042800 | -1.87040500 L |
| H-H_  | 8.79456300  | 28.38423000 | -1.60756500 L |
| C-C_R | 10.03794500 | 27.64093400 | -3.19385500 L |
| H-H_  | 6.83416900  | 25.98001500 | -4.56541200 L |
| C-C_R | 8.94582500  | 26.27332000 | -4.83642500 L |
| H-H_  | 4.69840800  | 29.92877600 | 1.01832800 L  |
| C-C_R | 5.47002000  | 31.08070600 | -0.62818700 L |
| H-H_  | 6.32010400  | 31.93391100 | -2.40955000 L |
| C-C_R | 10.10183100 | 26.87584100 | -4.35339300 L |
| H-H_  | 10.93463700 | 28.10721400 | -2.80042200 L |
| H-H_  | 8.97917000  | 25.67788800 | -5.74135300 L |
| H-H_  | 5.22253800  | 32.03837200 | -0.18630700 L |
| H-H_  | 11.04282900 | 26.74697200 | -4.87268600 L |
| C-C_R | -5.69305000 | 14.13181800 | -0.56479500 L |
| H-H_  | -5.96831200 | 15.14360400 | -0.84178000 L |
| C-C_R | -6.30273100 | 11.92955700 | 0.17071900 L  |
| H-H_  | -7.05469400 | 11.21487200 | 0.48586900 L  |
| C-C_R | -6.67273000 | 13.22372700 | -0.17532400 L |
| H-H_  | -7.71299900 | 13.52361200 | -0.14282400 L |
| C-C_R | -4.36090200 | 13.75397800 | -0.61358600 L |
| C-C_R | -3.98760000 | 12.45349200 | -0.25671700 L |
| H-H_  | -3.60126500 | 14.45938400 | -0.92854600 L |
| N-N_R | -2.63300500 | 12.06798500 | -0.29706200 L |
| C-C_R | -4.97117700 | 11.54437000 | 0.13980800 L  |
| C-C_R | -1.63434100 | 12.95744300 | 0.13090800 L  |
| C-C_R | -2.27966500 | 10.78441700 | -0.75445700 L |
| H-H_  | -4.68352800 | 10.54048000 | 0.42833500 L  |
| C-C_R | -0.41687700 | 13.03767400 | -0.55469600 L |
| C-C_R | -1.83997200 | 13.78503300 | 1.24083200 L  |
| C-C_R | -2.93274000 | 10.22058300 | -1.85551500 L |
| C-C_R | -1.27545500 | 10.05640900 | -0.10995900 L |
| H-H_  | -0.26552700 | 12.43437100 | -1.44165400 L |
| C-C_R | 0.57512200  | 13.89465400 | -0.12239500 L |
| H-H_  | -2.77935100 | 13.73559100 | 1.77735100 L  |
| C-C_R | -0.84859800 | 14.65260900 | 1.65789100 L  |
| C-C_R | -2.58668300 | 8.95046900  | -2.29341700 L |

|       |             |             |               |
|-------|-------------|-------------|---------------|
| H-H_  | -3.70454800 | 10.78460000 | -2.36268700 L |
| H-H_  | -0.77503400 | 10.48782600 | 0.74889300 L  |
| C-C_R | -0.92965100 | 8.79332600  | -0.56271000 L |
| C-C_R | 0.38798900  | 14.70588700 | 1.00485800 L  |
| H-H_  | 1.49960800  | 13.95879000 | -0.68200700 L |
| H-H_  | -1.01387000 | 15.30587700 | 2.50490500 L  |
| H-H_  | -3.09841500 | 8.52816300  | -3.15052200 L |
| C-C_R | -1.58359400 | 8.23121900  | -1.65492200 L |
| H-H_  | -0.15056000 | 8.24138300  | -0.04960800 L |
| C-C_R | 1.40615900  | 15.66716900 | 1.46785400 L  |
| H-H_  | -1.31629200 | 7.23950500  | -2.00207700 L |
| N-N_R | 0.92078900  | 16.80400700 | 1.94569600 L  |
| C-C_R | 2.81376200  | 15.46407000 | 1.38307700 L  |
| C-C_R | 1.76231400  | 17.79855300 | 2.24663100 L  |
| N-N_R | 3.64998900  | 16.47175300 | 1.58688200 L  |
| C-C_R | 3.46182800  | 14.16457400 | 1.12815500 L  |
| C-C_R | 3.16408700  | 17.65443100 | 1.97727400 L  |
| C-C_R | 1.26818300  | 19.00228500 | 2.80256500 L  |
| C-C_R | 2.94595800  | 12.95688200 | 1.61312800 L  |
| C-C_R | 4.68523500  | 14.13266300 | 0.44773400 L  |
| C-C_R | 4.03476600  | 18.75666000 | 2.15367600 L  |
| C-C_R | 2.15057400  | 20.08367800 | 3.03584100 L  |
| C-C_R | -0.10552400 | 19.12436900 | 3.12532200 L  |
| C-C_R | 3.60147900  | 11.76119500 | 1.39450900 L  |
| H-H_  | 2.03169700  | 12.95911100 | 2.19503500 L  |
| H-H_  | 5.11081900  | 15.06745300 | 0.10451300 L  |
| C-C_R | 5.34025900  | 12.93916600 | 0.20874400 L  |
| C-C_R | 3.52956100  | 19.98046500 | 2.65283400 L  |
| C-C_R | 5.40911000  | 18.63381300 | 1.83101800 L  |
| N-N_R | -1.23117700 | 19.22461300 | 3.38940500 L  |
| H-H_  | 3.20192500  | 10.83868400 | 1.79643900 L  |
| C-C_R | 4.80185000  | 11.73365600 | 0.67378600 L  |
| H-H_  | 6.27005500  | 12.93128600 | -0.34499000 L |
| N-N_R | 6.53410000  | 18.53444000 | 1.56783000 L  |
| N-N_R | 5.45604400  | 10.51418400 | 0.43153500 L  |
| C-C_R | 4.70544500  | 9.36606700  | 0.11727700 L  |
| C-C_R | 6.86127800  | 10.44294500 | 0.49146700 L  |
| C-C_R | 3.59639900  | 9.45718000  | -0.72897800 L |
| C-C_R | 5.06215900  | 8.12050800  | 0.64186300 L  |
| C-C_R | 7.57141400  | 9.67860600  | -0.43822600 L |
| C-C_R | 7.56097000  | 11.13996800 | 1.48179400 L  |
| H-H_  | 3.32304100  | 10.41982400 | -1.14550300 L |
| C-C_R | 2.85911100  | 8.32482500  | -1.03754700 L |
| H-H_  | 5.91580100  | 8.04796800  | 1.30548900 L  |

|       |             |             |               |
|-------|-------------|-------------|---------------|
| C-C_R | 4.32501600  | 6.99151400  | 0.31784400 L  |
| H-H_  | 7.03266400  | 9.14745300  | -1.21388200 L |
| C-C_R | 8.95440200  | 9.60821600  | -0.36990300 L |
| H-H_  | 7.01388500  | 11.72749600 | 2.20834400 L  |
| C-C_R | 8.94572000  | 11.07388900 | 1.53158800 L  |
| H-H_  | 2.00462500  | 8.41279600  | -1.69782500 L |
| C-C_R | 3.21868700  | 7.08473300  | -0.51951300 L |
| H-H_  | 4.61215900  | 6.03276600  | 0.73631700 L  |
| C-C_R | 9.64959800  | 10.30682500 | 0.61108200 L  |
| H-H_  | 9.49322500  | 9.01477100  | -1.09904700 L |
| H-H_  | 9.47456400  | 11.61996300 | 2.30437600 L  |
| H-H_  | 2.64533400  | 6.20035400  | -0.76705200 L |
| H-H_  | 10.73104900 | 10.25547900 | 0.65651500 L  |
| C-C_R | -2.56887100 | 24.83237800 | 8.70139300 L  |
| H-H_  | -2.85786900 | 23.87094900 | 9.11136400 L  |
| C-C_R | -3.06203700 | 27.13359000 | 8.22465100 L  |
| H-H_  | -3.74500400 | 27.97488900 | 8.24729900 L  |
| C-C_R | -3.45112000 | 25.90590400 | 8.74924700 L  |
| H-H_  | -4.43332600 | 25.78634100 | 9.19160100 L  |
| C-C_R | -1.30931800 | 24.97989600 | 8.14344100 L  |
| C-C_R | -0.91944900 | 26.21211400 | 7.60831600 L  |
| H-H_  | -0.61846600 | 24.14614400 | 8.11817200 L  |
| N-N_R | 0.35686900  | 26.36459100 | 7.03114500 L  |
| C-C_R | -1.81115600 | 27.28880300 | 7.65055600 L  |
| C-C_R | 0.89954700  | 25.33730700 | 6.24115200 L  |
| C-C_R | 1.08370300  | 27.55190100 | 7.23493000 L  |
| H-H_  | -1.51678300 | 28.24100500 | 7.22561900 L  |
| C-C_R | 2.26104000  | 25.02823000 | 6.32254400 L  |
| C-C_R | 0.08906800  | 24.60108100 | 5.36890300 L  |
| C-C_R | 1.08864800  | 28.17320900 | 8.48818300 L  |
| C-C_R | 1.80838400  | 28.12562600 | 6.18671500 L  |
| H-H_  | 2.88783400  | 25.56208300 | 7.02672900 L  |
| C-C_R | 2.80188600  | 24.03440800 | 5.52990800 L  |
| H-H_  | -0.96710600 | 24.82766000 | 5.30123100 L  |
| C-C_R | 0.63473500  | 23.59638500 | 4.59265200 L  |
| C-C_R | 1.79990700  | 29.34857300 | 8.67977500 L  |
| H-H_  | 0.53714000  | 27.72592600 | 9.30590000 L  |
| H-H_  | 1.79775000  | 27.65202200 | 5.21220400 L  |
| C-C_R | 2.52432800  | 29.29465200 | 6.39017600 L  |
| C-C_R | 2.00482300  | 23.31160400 | 4.63442400 L  |
| H-H_  | 3.85293600  | 23.79427800 | 5.62707700 L  |
| H-H_  | 0.00553500  | 23.01366200 | 3.93089300 L  |
| H-H_  | 1.79654600  | 29.81720000 | 9.65546800 L  |
| C-C_R | 2.52243900  | 29.91574500 | 7.63522800 L  |

|       |             |             |               |
|-------|-------------|-------------|---------------|
| H-H_  | 3.07564100  | 29.72900600 | 5.56479200 L  |
| C-C_R | 2.53723500  | 22.21225800 | 3.80866200 L  |
| H-H_  | 3.07655900  | 30.83362300 | 7.79012800 L  |
| N-N_R | 1.70717400  | 21.19182800 | 3.63858500 L  |
| C-C_R | 3.84935400  | 22.17373800 | 3.25398000 L  |
| N-N_R | 4.32778800  | 21.04901200 | 2.74246100 L  |
| C-C_R | 4.75046100  | 23.33529700 | 3.14608700 L  |
| C-C_R | 4.28356900  | 24.63118400 | 2.89194000 L  |
| C-C_R | 6.13436700  | 23.13494100 | 3.21534600 L  |
| C-C_R | 5.15868900  | 25.68962800 | 2.75121600 L  |
| H-H_  | 3.22149800  | 24.80442000 | 2.77351700 L  |
| H-H_  | 6.50471400  | 22.12926500 | 3.37137500 L  |
| C-C_R | 7.01654300  | 24.19261300 | 3.09400300 L  |
| H-H_  | 4.78294000  | 26.68122500 | 2.53116600 L  |
| C-C_R | 6.53870900  | 25.48808500 | 2.86678300 L  |
| H-H_  | 8.08293700  | 24.02259100 | 3.17898900 L  |
| N-N_R | 7.42649300  | 26.56896800 | 2.74711000 L  |
| C-C_R | 7.09702600  | 27.81485000 | 3.31582300 L  |
| C-C_R | 8.65076600  | 26.40730500 | 2.06961200 L  |
| C-C_R | 6.47638600  | 27.87749100 | 4.56683900 L  |
| C-C_R | 7.38706100  | 29.00295500 | 2.63799900 L  |
| C-C_R | 9.81604700  | 27.00547700 | 2.56039300 L  |
| C-C_R | 8.71514800  | 25.64404900 | 0.90083400 L  |
| H-H_  | 6.25870700  | 26.95845500 | 5.09783200 L  |
| C-C_R | 6.15195100  | 29.10379500 | 5.12370400 L  |
| H-H_  | 7.85878000  | 28.95786900 | 1.66397700 L  |
| C-C_R | 7.06877400  | 30.22451500 | 3.20961800 L  |
| H-H_  | 9.77277500  | 27.58831800 | 3.47245800 L  |
| C-C_R | 11.01554500 | 26.84567800 | 1.88507600 L  |
| H-H_  | 7.81238100  | 25.18410300 | 0.51461200 L  |
| C-C_R | 9.92340000  | 25.47817100 | 0.24349900 L  |
| H-H_  | 5.67600800  | 29.13352100 | 6.09725800 L  |
| C-C_R | 6.44823200  | 30.28479300 | 4.45183600 L  |
| H-H_  | 7.29767800  | 31.13876200 | 2.67037500 L  |
| C-C_R | 11.07940500 | 26.08069300 | 0.72653100 L  |
| H-H_  | 11.91221200 | 27.31206600 | 2.27950200 L  |
| H-H_  | 9.95738200  | 24.88197500 | -0.66133000 L |
| H-H_  | 6.20011300  | 31.24322300 | 4.89361700 L  |
| H-H_  | 12.02104100 | 25.95106000 | 0.20733700 L  |
| C-C_R | -4.71547500 | 13.33666900 | 4.51512900 L  |
| H-H_  | -4.99010000 | 14.34769100 | 4.23824300 L  |
| C-C_R | -5.32451900 | 11.13364400 | 5.25074200 L  |
| H-H_  | -6.07711900 | 10.41972400 | 5.56579400 L  |
| C-C_R | -5.69449300 | 12.42770700 | 4.90370500 L  |

|       |             |             |              |
|-------|-------------|-------------|--------------|
| H-H_  | -6.73478700 | 12.72769900 | 4.93719900 L |
| C-C_R | -3.38266400 | 12.95795800 | 4.46544300 L |
| C-C_R | -3.01002500 | 11.65834300 | 4.82320700 L |
| H-H_  | -2.62369100 | 13.66423600 | 4.15137800 L |
| N-N_R | -1.65479200 | 11.27207200 | 4.78296100 L |
| C-C_R | -3.99360200 | 10.74922200 | 5.21973200 L |
| C-C_R | -0.65676600 | 12.16229400 | 5.21083300 L |
| C-C_R | -1.30209100 | 9.98926800  | 4.32546800 L |
| H-H_  | -3.70531600 | 9.74456700  | 5.50835800 L |
| C-C_R | 0.56133500  | 12.24176100 | 4.52532700 L |
| C-C_R | -0.86176000 | 12.98912000 | 6.32085500 L |
| C-C_R | -1.95516500 | 9.42543400  | 3.22441000 L |
| C-C_R | -0.29788100 | 9.26126000  | 4.96996500 L |
| H-H_  | 0.71204800  | 11.63922300 | 3.63827000 L |
| C-C_R | 1.55269600  | 13.09950500 | 4.95752900 L |
| H-H_  | -1.80177600 | 12.94044200 | 6.85727500 L |
| C-C_R | 0.12897700  | 13.85746000 | 6.73781600 L |
| C-C_R | -1.60910900 | 8.15532000  | 2.78650800 L |
| H-H_  | -2.72697300 | 9.98945200  | 2.71723800 L |
| H-H_  | 0.20317800  | 9.69191300  | 5.82891600 L |
| C-C_R | 0.04794900  | 7.99807000  | 4.51622000 L |
| C-C_R | 1.36556400  | 13.91073900 | 6.08478200 L |
| H-H_  | 2.47718300  | 13.16364100 | 4.39791800 L |
| H-H_  | -0.03629600 | 14.51072800 | 7.58482900 L |
| H-H_  | -2.12020300 | 7.73225100  | 1.92950100 L |
| C-C_R | -0.60538200 | 7.43530700  | 3.42510100 L |
| H-H_  | 0.82701400  | 7.44623400  | 5.03031600 L |
| C-C_R | 2.38437100  | 14.87125600 | 6.54787700 L |
| H-H_  | -0.33871800 | 6.44435700  | 3.07784800 L |
| N-N_R | 1.89836400  | 16.00885800 | 7.02562000 L |
| C-C_R | 3.79197400  | 14.66815800 | 6.46310000 L |
| C-C_R | 2.73988900  | 17.00340400 | 7.32655500 L |
| N-N_R | 4.62756300  | 15.67660400 | 6.66680600 L |
| C-C_R | 4.44004000  | 13.36866100 | 6.20817800 L |
| C-C_R | 4.14229900  | 16.85851800 | 7.05729700 L |
| C-C_R | 2.24639500  | 18.20637300 | 7.88258800 L |
| C-C_R | 3.92353300  | 12.16173300 | 6.69305300 L |
| C-C_R | 5.66281000  | 13.33751500 | 5.52765800 L |
| C-C_R | 5.01297800  | 17.96074800 | 7.23369900 L |
| C-C_R | 3.12814800  | 19.28853000 | 8.11576600 L |
| C-C_R | 0.87205100  | 18.32922000 | 8.20524600 L |
| C-C_R | 4.57969100  | 10.96528300 | 6.47453200 L |
| H-H_  | 3.00927200  | 12.16396300 | 7.27496000 L |
| H-H_  | 6.08839400  | 14.27230400 | 5.18443700 L |

|       |             |             |               |
|-------|-------------|-------------|---------------|
| C-C_R | 6.31783300  | 12.14401700 | 5.28866900 L  |
| C-C_R | 4.50777300  | 19.18455300 | 7.73285800 L  |
| C-C_R | 6.38668400  | 17.83866500 | 6.91094200 L  |
| N-N_R | -0.25357700 | 18.42935800 | 8.46833500 L  |
| H-H_  | 4.17950000  | 10.04353600 | 6.87636300 L  |
| C-C_R | 5.77942400  | 10.93850800 | 5.75371000 L  |
| H-H_  | 7.24763000  | 12.13613700 | 4.73493400 L  |
| N-N_R | 7.51231200  | 17.73852700 | 6.64785300 L  |
| N-N_R | 6.43361900  | 9.71903600  | 5.51145900 L  |
| C-C_R | 5.68365700  | 8.57015500  | 5.19730000 L  |
| C-C_R | 7.83949000  | 9.64703200  | 5.57149000 L  |
| C-C_R | 4.57397300  | 8.66203200  | 4.35094600 L  |
| C-C_R | 6.04037100  | 7.32459600  | 5.72188600 L  |
| C-C_R | 8.54962600  | 8.88269300  | 4.64179700 L  |
| C-C_R | 8.53918200  | 10.34405500 | 6.56181700 L  |
| H-H_  | 4.30061600  | 9.62467600  | 3.93442100 L  |
| C-C_R | 3.83668600  | 7.52967700  | 4.04237700 L  |
| H-H_  | 6.89401300  | 7.25205500  | 6.38551200 L  |
| C-C_R | 5.30259100  | 6.19636500  | 5.39776900 L  |
| H-H_  | 8.01090100  | 8.35143300  | 3.86514800 L  |
| C-C_R | 9.93261400  | 8.81230400  | 4.71012000 L  |
| H-H_  | 7.99146000  | 10.93234700 | 7.28826800 L  |
| C-C_R | 9.92329400  | 10.27874100 | 6.61151200 L  |
| H-H_  | 2.98219900  | 7.61764700  | 3.38209900 L  |
| C-C_R | 4.19626200  | 6.28958500  | 4.56041100 L  |
| H-H_  | 5.58973300  | 5.23761800  | 5.81624100 L  |
| C-C_R | 10.62719800 | 9.51157000  | 5.69001300 L  |
| H-H_  | 10.47082600 | 8.21951600  | 3.97988300 L  |
| H-H_  | 10.45216400 | 10.82470800 | 7.38330600 L  |
| H-H_  | 3.62354600  | 5.40444200  | 4.31297100 L  |
| H-H_  | 11.70926100 | 9.45956600  | 5.73653800 L  |
| C-C_R | -1.59129700 | 24.03723000 | 13.78131800 L |
| H-H_  | -1.88029500 | 23.07580100 | 14.19128800 L |
| C-C_R | -2.08382500 | 26.33767800 | 13.30467400 L |
| H-H_  | -2.76740400 | 27.17963400 | 13.32622900 L |
| C-C_R | -2.47354500 | 25.11075500 | 13.82917200 L |
| H-H_  | -3.45575100 | 24.99119200 | 14.27152600 L |
| C-C_R | -0.33174400 | 24.18474800 | 13.22336500 L |
| C-C_R | 0.05812600  | 25.41696500 | 12.68824000 L |
| H-H_  | 0.35910900  | 23.35099600 | 13.19809600 L |
| N-N_R | 1.33444400  | 25.56944200 | 12.11106900 L |
| C-C_R | -0.83294400 | 26.49289000 | 12.73057900 L |
| C-C_R | 1.87714700  | 24.54205200 | 11.32008200 L |
| C-C_R | 2.06127800  | 26.75675200 | 12.31485500 L |

|       |             |             |               |
|-------|-------------|-------------|---------------|
| H-H_  | -0.53857100 | 27.44509300 | 12.30564200 L |
| C-C_R | 3.23925200  | 24.23231700 | 11.40256700 L |
| C-C_R | 1.06728000  | 23.80516800 | 10.44892600 L |
| C-C_R | 2.06686000  | 27.37729700 | 13.56820600 L |
| C-C_R | 2.78595900  | 27.33047700 | 11.26663900 L |
| H-H_  | 3.86540900  | 24.76693400 | 12.10665300 L |
| C-C_R | 3.77946100  | 23.23925900 | 10.60983200 L |
| H-H_  | 0.01110600  | 24.03174800 | 10.38125400 L |
| C-C_R | 1.61231000  | 22.80123700 | 9.67257700 L  |
| C-C_R | 2.77748200  | 28.55342400 | 13.75969900 L |
| H-H_  | 1.51471400  | 26.93077800 | 14.38582400 L |
| H-H_  | 2.77596200  | 26.85610900 | 10.29222700 L |
| C-C_R | 3.50190300  | 28.49950400 | 11.47010100 L |
| C-C_R | 2.98303500  | 22.51569200 | 9.71444700 L  |
| H-H_  | 4.83051000  | 22.99913000 | 10.70700200 L |
| H-H_  | 0.98310900  | 22.21851300 | 9.01081700 L  |
| H-H_  | 2.77475800  | 29.02128800 | 14.73549100 L |
| C-C_R | 3.50001400  | 29.12059700 | 12.71515200 L |
| H-H_  | 4.05385300  | 28.93309300 | 10.64481500 L |
| C-C_R | 3.51481000  | 21.41710900 | 8.88858700 L  |
| H-H_  | 4.05477100  | 30.03771000 | 12.87015100 L |
| N-N_R | 2.68474900  | 20.39667900 | 8.71850900 L  |
| C-C_R | 4.82692800  | 21.37859000 | 8.33390500 L  |
| N-N_R | 5.30600000  | 20.25309900 | 7.82248400 L  |
| C-C_R | 5.72803600  | 22.54014900 | 8.22601100 L  |
| C-C_R | 5.26180700  | 23.83516400 | 7.97096900 L  |
| C-C_R | 7.11196700  | 22.33968600 | 8.29427600 L  |
| C-C_R | 6.13629000  | 24.89437200 | 7.83014600 L  |
| H-H_  | 4.19907300  | 24.00927100 | 7.85344100 L  |
| H-H_  | 7.48228900  | 21.33411600 | 8.45129900 L  |
| C-C_R | 7.99478100  | 23.39659300 | 8.17303200 L  |
| H-H_  | 5.76051500  | 25.88607600 | 7.61109100 L  |
| C-C_R | 7.51628400  | 24.69293700 | 7.94670700 L  |
| H-H_  | 9.06051200  | 23.22744300 | 8.25891300 L  |
| N-N_R | 8.40406800  | 25.77382000 | 7.82703400 L  |
| C-C_R | 8.07523800  | 27.01893700 | 8.39584600 L  |
| C-C_R | 9.62897800  | 25.61139200 | 7.14963500 L  |
| C-C_R | 7.45459800  | 27.08157800 | 9.64686200 L  |
| C-C_R | 8.36463500  | 28.20780700 | 7.71792300 L  |
| C-C_R | 10.79362100 | 26.21032900 | 7.64031800 L  |
| C-C_R | 9.69336000  | 24.84813700 | 5.98085700 L  |
| H-H_  | 7.23628100  | 26.16330700 | 10.17775600 L |
| C-C_R | 7.12952600  | 28.30864700 | 10.20362800 L |
| H-H_  | 8.83635400  | 28.16272100 | 6.74390100 L  |



|       |             |              |               |
|-------|-------------|--------------|---------------|
| C-C_R | 8.04634900  | 29.42936700  | 8.28954300 L  |
| H-H_  | 10.75035000 | 26.79316900  | 8.55238300 L  |
| C-C_R | 11.99312000 | 26.05053000  | 6.96500000 L  |
| H-H_  | 8.78995600  | 24.38895400  | 5.59453600 L  |
| C-C_R | 10.90097400 | 24.68302300  | 5.32342400 L  |
| H-H_  | 6.65358300  | 28.33837300  | 11.17718300 L |
| C-C_R | 7.42580700  | 29.48964500  | 9.53176000 L  |
| H-H_  | 8.27589000  | 30.34285000  | 7.75039800 L  |
| C-C_R | 12.05698000 | 25.28554400  | 5.80645500 L  |
| H-H_  | 12.88978700 | 26.51691700  | 7.35942700 L  |
| H-H_  | 10.93495700 | 24.08682700  | 4.41859400 L  |
| H-H_  | 7.17832500  | 30.44731100  | 9.97364000 L  |
| H-H_  | 12.99861500 | 25.15591100  | 5.28726100 L  |
| C-C_R | 11.34422400 | -27.87416700 | -2.54832800 L |
| H-H_  | 12.30424600 | -28.31902600 | -2.31374600 L |
| C-C_R | 9.01749800  | -28.09564300 | -3.09848600 L |
| H-H_  | 8.15432000  | -28.71598200 | -3.31047600 L |
| C-C_R | 10.24232600 | -28.68372600 | -2.80545100 L |
| H-H_  | 10.33994400 | -29.76209700 | -2.77840300 L |
| C-C_R | 11.22515200 | -26.49309100 | -2.57531500 L |
| C-C_R | 9.99455200  | -25.90189400 | -2.87788900 L |
| H-H_  | 12.08113400 | -25.86553200 | -2.36227600 L |
| N-N_R | 9.87156800  | -24.49810000 | -2.91647700 L |
| C-C_R | 8.89105300  | -26.71638100 | -3.14257100 L |
| C-C_R | 10.89744100 | -23.71676000 | -3.47120700 L |
| C-C_R | 8.71484100  | -23.87929900 | -2.40819300 L |
| H-H_  | 7.93890700  | -26.25997400 | -3.38926100 L |
| C-C_R | 11.25350400 | -22.49620600 | -2.88514300 L |
| C-C_R | 11.58531200 | -24.14480200 | -4.61173400 L |
| C-C_R | 8.12260100  | -24.34390700 | -1.22846700 L |
| C-C_R | 8.14034300  | -22.79628600 | -3.07884300 L |
| H-H_  | 10.75776900 | -22.17860300 | -1.97629000 L |
| C-C_R | 12.24604600 | -21.71567400 | -3.44366200 L |
| H-H_  | 11.32316700 | -25.08905600 | -5.07320400 L |
| C-C_R | 12.59003100 | -23.36532600 | -5.15574100 L |
| C-C_R | 6.97634400  | -23.73450800 | -0.73902300 L |
| H-H_  | 8.57018000  | -25.17568800 | -0.70081300 L |
| H-H_  | 8.59117500  | -22.44082100 | -3.99792500 L |
| C-C_R | 7.00129600  | -22.18830200 | -2.57598200 L |
| C-C_R | 12.92142100 | -22.12356500 | -4.60076500 L |
| H-H_  | 12.52297600 | -20.78762100 | -2.95994500 L |
| H-H_  | 13.13495600 | -23.70493000 | -6.02574500 L |
| H-H_  | 6.53092600  | -24.10137300 | 0.17840700 L  |
| C-C_R | 6.41005600  | -22.65323700 | -1.40525100 L |

|       |             |              |               |
|-------|-------------|--------------|---------------|
| H-H_  | 6.56722700  | -21.35142300 | -3.11088000 L |
| C-C_R | 14.01741600 | -21.33757600 | -5.19745400 L |
| H-H_  | 5.51495800  | -22.18127700 | -1.01829800 L |
| N-N_R | 15.00478400 | -22.06113100 | -5.70686800 L |
| C-C_R | 14.08619500 | -19.91533800 | -5.20693400 L |
| C-C_R | 16.11325100 | -21.44527900 | -6.13098600 L |
| N-N_R | 15.21520400 | -19.30119500 | -5.53375200 L |
| C-C_R | 12.95368500 | -19.01579000 | -4.92041600 L |
| C-C_R | 16.25409200 | -20.02732000 | -5.96006900 L |
| C-C_R | 17.15893400 | -22.19222200 | -6.72190000 L |
| C-C_R | 11.63803200 | -19.32194900 | -5.28955200 L |
| C-C_R | 13.20188200 | -17.76984900 | -4.33281800 L |
| C-C_R | 17.48137800 | -19.39552800 | -6.26814800 L |
| C-C_R | 18.36505300 | -21.55024100 | -7.08796300 L |
| C-C_R | 16.99839100 | -23.58265400 | -6.94759900 L |
| C-C_R | 10.60527600 | -18.43651100 | -5.04724200 L |
| H-H_  | 11.42712000 | -20.25340100 | -5.80038100 L |
| H-H_  | 14.22261800 | -17.51019600 | -4.08096300 L |
| C-C_R | 12.17257000 | -16.88545600 | -4.07018500 L |
| C-C_R | 18.54955500 | -20.15440400 | -6.80287000 L |
| C-C_R | 17.64258500 | -18.00596800 | -6.04334500 L |
| N-N_R | 16.86717700 | -24.72088000 | -7.13228500 L |
| H-H_  | 9.59765300  | -18.67740600 | -5.36013900 L |
| C-C_R | 10.85648500 | -17.21147900 | -4.41807700 L |
| H-H_  | 12.37949900 | -15.93881400 | -3.58825800 L |
| N-N_R | 17.77379800 | -16.86774200 | -5.85865900 L |
| N-N_R | 9.80181800  | -16.32273600 | -4.15052700 L |
| C-C_R | 8.56020000  | -16.81859800 | -3.71055900 L |
| C-C_R | 9.98859400  | -14.93544700 | -4.31116700 L |
| C-C_R | 8.50620400  | -17.87149800 | -2.79069500 L |
| C-C_R | 7.36711500  | -16.26375500 | -4.18231000 L |
| C-C_R | 9.44172700  | -14.03627200 | -3.39178800 L |
| C-C_R | 10.72752200 | -14.44438800 | -5.39237200 L |
| H-H_  | 9.43035400  | -18.29681400 | -2.41627300 L |
| C-C_R | 7.28351300  | -18.35791700 | -2.35930500 L |
| H-H_  | 7.40452400  | -15.45534100 | -4.90222500 L |
| C-C_R | 6.14876800  | -16.75111700 | -3.73561500 L |
| H-H_  | 8.87917900  | -14.41462500 | -2.54656200 L |
| C-C_R | 9.62520200  | -12.67222200 | -3.55906500 L |
| H-H_  | 11.14740100 | -15.13825900 | -6.11074800 L |
| C-C_R | 10.91680300 | -13.07968900 | -5.54146000 L |
| H-H_  | 7.26001600  | -19.17084100 | -1.64257100 L |
| C-C_R | 6.09680800  | -17.80090800 | -2.82508800 L |
| H-H_  | 5.23085600  | -16.31316200 | -4.11324900 L |

|       |             |              |                |
|-------|-------------|--------------|----------------|
| C-C_R | 10.36618300 | -12.18605700 | -4.63063600 L  |
| H-H_  | 9.19868700  | -11.98731800 | -2.83687700 L  |
| H-H_  | 11.49233900 | -12.71371300 | -6.38401300 L  |
| H-H_  | 5.14154200  | -18.17751800 | -2.48013200 L  |
| H-H_  | 10.51323700 | -11.11886100 | -4.75381400 L  |
| C-C_R | 21.71442100 | -27.43041700 | -12.66696600 L |
| H-H_  | 20.68799600 | -27.55520000 | -12.99284800 L |
| C-C_R | 23.91201200 | -28.32261400 | -12.29704100 L |
| H-H_  | 24.60793800 | -29.15450100 | -12.32036800 L |
| C-C_R | 22.59741400 | -28.50320000 | -12.71387500 L |
| H-H_  | 22.26499200 | -29.46932000 | -13.07318300 L |
| C-C_R | 22.13528500 | -26.19003700 | -12.21417400 L |
| C-C_R | 23.45512500 | -26.01029400 | -11.78705300 L |
| H-H_  | 21.44905400 | -25.35246900 | -12.18919700 L |
| N-N_R | 23.88543400 | -24.75335500 | -11.31769100 L |
| C-C_R | 24.34003400 | -27.09130700 | -11.82900200 L |
| C-C_R | 23.03932200 | -23.97666300 | -10.50853000 L |
| C-C_R | 25.16791800 | -24.28140000 | -11.64939900 L |
| H-H_  | 25.35951700 | -26.95846300 | -11.48706300 L |
| C-C_R | 22.98334700 | -22.58813400 | -10.67253200 L |
| C-C_R | 22.23187200 | -24.57531000 | -9.53421400 L  |
| C-C_R | 25.68369500 | -24.47125300 | -12.93469300 L |
| C-C_R | 25.94344300 | -23.61605500 | -10.69496100 L |
| H-H_  | 23.57092900 | -22.12038600 | -11.45329100 L |
| C-C_R | 22.17053500 | -21.82033400 | -9.86356800 L  |
| H-H_  | 22.26147600 | -25.64980800 | -9.40268500 L  |
| C-C_R | 21.40728100 | -23.80225300 | -8.74020500 L  |
| C-C_R | 26.95310100 | -24.01217800 | -13.25126600 L |
| H-H_  | 25.08217200 | -24.97749000 | -13.67943300 L |
| H-H_  | 25.55068200 | -23.47443100 | -9.69609800 L  |
| C-C_R | 27.20678200 | -23.15062200 | -11.02444700 L |
| C-C_R | 21.37967800 | -22.40749200 | -8.86692200 L  |
| H-H_  | 22.12374600 | -20.75083600 | -10.02417800 L |
| H-H_  | 20.76885900 | -24.26652300 | -7.99936100 L  |
| H-H_  | 27.33860900 | -24.16404800 | -14.25223000 L |
| C-C_R | 27.72232800 | -23.34738400 | -12.30095400 L |
| H-H_  | 27.79694700 | -22.64099600 | -10.27131000 L |
| C-C_R | 20.46514500 | -21.62501100 | -8.01688200 L  |
| H-H_  | 28.71172500 | -22.98938800 | -12.55449100 L |
| N-N_R | 19.32365000 | -22.23278700 | -7.72225900 L  |
| C-C_R | 20.71332800 | -20.29791800 | -7.56076500 L  |
| N-N_R | 19.73828700 | -19.58202300 | -7.01801400 L  |
| C-C_R | 22.02714000 | -19.63028900 | -7.59279000 L  |
| C-C_R | 23.22733700 | -20.31928700 | -7.38510500 L  |

|       |             |              |                |
|-------|-------------|--------------|----------------|
| C-C_R | 22.08339400 | -18.24058000 | -7.75302500 L  |
| C-C_R | 24.43916100 | -19.65552200 | -7.37607600 L  |
| H-H_  | 23.20954000 | -21.38562000 | -7.19832700 L  |
| H-H_  | 21.15549100 | -17.69548700 | -7.87482500 L  |
| C-C_R | 23.29227800 | -17.57006100 | -7.76391400 L  |
| H-H_  | 25.35631800 | -20.19999800 | -7.19022800 L  |
| C-C_R | 24.49005900 | -18.27225700 | -7.58203500 L  |
| H-H_  | 23.31857900 | -16.49893000 | -7.91778800 L  |
| N-N_R | 25.72323800 | -17.60154600 | -7.59634500 L  |
| C-C_R | 26.83838000 | -18.19728900 | -8.21482900 L  |
| C-C_R | 25.84301600 | -16.32873800 | -7.00488300 L  |
| C-C_R | 26.69119100 | -18.89404000 | -9.41734000 L  |
| C-C_R | 28.10851400 | -18.09822200 | -7.63542300 L  |
| C-C_R | 26.60985600 | -15.33243400 | -7.61658700 L  |
| C-C_R | 25.19407300 | -16.04811300 | -5.79818500 L  |
| H-H_  | 25.71042700 | -18.96615600 | -9.87348000 L  |
| C-C_R | 27.79104900 | -19.48138200 | -10.02404300 L |
| H-H_  | 28.22520700 | -17.56732500 | -6.69956400 L  |
| C-C_R | 29.20310100 | -18.67867600 | -8.25608200 L  |
| H-H_  | 27.10445400 | -15.54267500 | -8.55815500 L  |
| C-C_R | 26.72732100 | -14.08515100 | -7.02545500 L  |
| H-H_  | 24.60571800 | -16.82089800 | -5.31762900 L  |
| C-C_R | 25.30724700 | -14.79222800 | -5.22418700 L  |
| H-H_  | 27.65858200 | -20.01356200 | -10.95916400 L |
| C-C_R | 29.05352900 | -19.37507900 | -9.45064300 L  |
| H-H_  | 30.18116200 | -18.59498900 | -7.79421400 L  |
| C-C_R | 26.07581900 | -13.80534000 | -5.82879600 L  |
| H-H_  | 27.32161700 | -13.32010100 | -7.51307400 L  |
| H-H_  | 24.79731800 | -14.58909100 | -4.28929200 L  |
| H-H_  | 29.91247600 | -19.82763900 | -9.93015700 L  |
| H-H_  | 26.16385900 | -12.82535100 | -5.37464800 L  |
| C-C_R | 12.32179900 | -28.66931500 | 2.53159600 L   |
| H-H_  | 13.28245800 | -29.11493800 | 2.76627700 L   |
| C-C_R | 9.99571000  | -28.89155500 | 1.98153700 L   |
| H-H_  | 9.13189500  | -29.51113000 | 1.76944900 L   |
| C-C_R | 11.22053800 | -29.47963800 | 2.27457200 L   |
| H-H_  | 11.31815600 | -30.55801000 | 2.30162000 L   |
| C-C_R | 12.20336400 | -27.28900400 | 2.50470800 L   |
| C-C_R | 10.97212700 | -26.69704200 | 2.20203600 L   |
| H-H_  | 13.05870900 | -26.66068000 | 2.71764900 L   |
| N-N_R | 10.84978000 | -25.29401300 | 2.16354600 L   |
| C-C_R | 9.86862800  | -27.51153000 | 1.93735300 L   |
| C-C_R | 11.87501600 | -24.51190800 | 1.60871700 L   |
| C-C_R | 9.69241500  | -24.67444800 | 2.67173200 L   |

|       |             |              |               |
|-------|-------------|--------------|---------------|
| H-H_  | 8.91711900  | -27.05588700 | 1.69076300 L  |
| C-C_R | 12.23171600 | -23.29211800 | 2.19488000 L  |
| C-C_R | 12.56354900 | -24.94082200 | 0.46729500 L  |
| C-C_R | 9.10017500  | -25.13905500 | 3.85145700 L  |
| C-C_R | 9.11791700  | -23.59143500 | 2.00108100 L  |
| H-H_  | 11.73534400 | -22.97375200 | 3.10363400 L  |
| C-C_R | 13.22362100 | -22.51082200 | 1.63626200 L  |
| H-H_  | 12.30074100 | -25.88420400 | 0.00672000 L  |
| C-C_R | 13.56760500 | -24.16047500 | -0.07581600 L |
| C-C_R | 7.95391900  | -24.52965700 | 4.34090100 L  |
| H-H_  | 9.54775400  | -25.97083600 | 4.37911100 L  |
| H-H_  | 9.56938800  | -23.23673300 | 1.08209800 L  |
| C-C_R | 7.97887000  | -22.98345000 | 2.50394200 L  |
| C-C_R | 13.89899600 | -22.91871300 | 0.47915900 L  |
| H-H_  | 13.50055100 | -21.58277000 | 2.11997900 L  |
| H-H_  | 14.11255700 | -24.50018600 | -0.94681400 L |
| H-H_  | 7.50913800  | -24.89728600 | 5.25843000 L  |
| C-C_R | 7.38826800  | -23.44914900 | 3.67477200 L  |
| H-H_  | 7.54480100  | -22.14657100 | 1.96904500 L  |
| C-C_R | 14.99565300 | -22.13359600 | -0.11842500 L |
| H-H_  | 6.49317100  | -22.97719000 | 4.06172500 L  |
| N-N_R | 15.98235800 | -22.85627900 | -0.62694400 L |
| C-C_R | 15.06440700 | -20.71125100 | -0.12691100 L |
| C-C_R | 17.09082500 | -22.24042700 | -1.05106100 L |
| N-N_R | 16.19277900 | -20.09634400 | -0.45382800 L |
| C-C_R | 13.93189700 | -19.81170300 | 0.15960700 L  |
| C-C_R | 17.23166700 | -20.82246800 | -0.88014500 L |
| C-C_R | 18.13714600 | -22.98813500 | -1.64187700 L |
| C-C_R | 12.61560700 | -20.11709800 | -0.20962700 L |
| C-C_R | 14.17945600 | -18.56499800 | 0.74710600 L  |
| C-C_R | 18.45959000 | -20.19144100 | -1.18812500 L |
| C-C_R | 19.34262800 | -22.34539000 | -2.00803900 L |
| C-C_R | 17.97596500 | -24.37780200 | -1.86767400 L |
| C-C_R | 11.58351300 | -19.23253100 | 0.03178800 L  |
| H-H_  | 12.40469500 | -21.04855000 | -0.72045700 L |
| H-H_  | 15.20019300 | -18.30534500 | 0.99896200 L  |
| C-C_R | 13.15014500 | -17.68060500 | 1.00974000 L  |
| C-C_R | 19.52776700 | -20.95031700 | -1.72284700 L |
| C-C_R | 18.62015900 | -18.80111600 | -0.96342000 L |
| N-N_R | 17.84475200 | -25.51602800 | -2.05236000 L |
| H-H_  | 10.57522800 | -19.47255400 | -0.28021500 L |
| C-C_R | 11.83405900 | -18.00662700 | 0.66184800 L  |
| H-H_  | 13.35707400 | -16.73396200 | 1.49166600 L  |
| N-N_R | 18.75201000 | -17.66365500 | -0.77863600 L |

|       |             |              |               |
|-------|-------------|--------------|---------------|
| N-N_R | 10.77939200 | -17.11788400 | 0.92939700 L  |
| C-C_R | 9.53841200  | -17.61451000 | 1.36946400 L  |
| C-C_R | 10.96680600 | -15.73135900 | 0.76885600 L  |
| C-C_R | 9.48441600  | -18.66741100 | 2.28932800 L  |
| C-C_R | 8.34535300  | -17.05977400 | 0.89671900 L  |
| C-C_R | 10.41993900 | -14.83218400 | 1.68823500 L  |
| C-C_R | 11.70573400 | -15.24030000 | -0.31234900 L |
| H-H_  | 10.40792900 | -19.09196200 | 2.66365100 L  |
| C-C_R | 8.26108800  | -19.15306500 | 2.72062000 L  |
| H-H_  | 8.38273600  | -16.25125400 | 0.17779800 L  |
| C-C_R | 7.12634300  | -17.54626500 | 1.34430900 L  |
| H-H_  | 9.85739100  | -15.21053700 | 2.53346100 L  |
| C-C_R | 10.60341400 | -13.46813400 | 1.52095800 L  |
| H-H_  | 12.12500100 | -15.93351500 | -1.03181700 L |
| C-C_R | 11.89437800 | -13.87483700 | -0.46153600 L |
| H-H_  | 8.23759000  | -19.96598900 | 3.43735400 L  |
| C-C_R | 7.07438300  | -18.59605700 | 2.25483600 L  |
| H-H_  | 6.20843100  | -17.10831000 | 0.96667500 L  |
| C-C_R | 11.34375800 | -12.98120500 | 0.44928800 L  |
| H-H_  | 10.17626100 | -12.78246700 | 2.24304700 L  |
| H-H_  | 12.46991300 | -13.50886100 | -1.30408800 L |
| H-H_  | 6.11975400  | -18.97343000 | 2.59989100 L  |
| H-H_  | 11.49144900 | -11.91477400 | 0.32620900 L  |
| C-C_R | 22.69199500 | -28.22556500 | -7.58704200 L |
| H-H_  | 21.66557000 | -28.35034900 | -7.91292400 L |
| C-C_R | 24.89024900 | -29.11863400 | -7.21801100 L |
| H-H_  | 25.58551300 | -29.94964900 | -7.24044300 L |
| C-C_R | 23.57501400 | -29.29845500 | -7.63494400 L |
| H-H_  | 23.24256700 | -30.26446800 | -7.99325900 L |
| C-C_R | 23.11286000 | -26.98518500 | -7.13425000 L |
| C-C_R | 24.43269900 | -26.80544200 | -6.70712900 L |
| H-H_  | 22.42662900 | -26.14761700 | -7.10927300 L |
| N-N_R | 24.86300900 | -25.54850300 | -6.23776700 L |
| C-C_R | 25.31824600 | -27.88721900 | -6.74897900 L |
| C-C_R | 24.01689600 | -24.77181100 | -5.42860600 L |
| C-C_R | 26.14549300 | -25.07654900 | -6.56947500 L |
| H-H_  | 26.33772900 | -27.75437500 | -6.40704000 L |
| C-C_R | 23.96155900 | -23.38404600 | -5.59250900 L |
| C-C_R | 23.21008400 | -25.37122300 | -4.45419100 L |
| C-C_R | 26.66190700 | -25.26716600 | -7.85467000 L |
| C-C_R | 26.92101800 | -24.41120300 | -5.61503600 L |
| H-H_  | 24.54853000 | -22.91564200 | -6.37436000 L |
| C-C_R | 23.14810900 | -22.61548200 | -4.78364400 L |
| H-H_  | 23.23968800 | -26.44572100 | -4.32266200 L |

|       |             |              |               |
|-------|-------------|--------------|---------------|
| C-C_R | 22.38485600 | -24.59740100 | -3.66028100 L |
| C-C_R | 27.93067500 | -24.80732700 | -8.17134100 L |
| H-H_  | 26.06038400 | -25.77340200 | -8.59941000 L |
| H-H_  | 26.52889400 | -24.27034400 | -4.61607500 L |
| C-C_R | 28.18435600 | -23.94577000 | -5.94452300 L |
| C-C_R | 22.35789000 | -23.20340500 | -3.78689900 L |
| H-H_  | 23.10132100 | -21.54598500 | -4.94425400 L |
| H-H_  | 21.74643300 | -25.06167100 | -2.91943700 L |
| H-H_  | 28.31682100 | -24.95996100 | -9.17220700 L |
| C-C_R | 28.69990200 | -24.14253200 | -7.22103000 L |
| H-H_  | 28.77515900 | -23.43690900 | -5.19128700 L |
| C-C_R | 21.44272000 | -22.42015900 | -2.93695700 L |
| H-H_  | 29.68993700 | -23.78530100 | -7.47446800 L |
| N-N_R | 20.30122500 | -23.02793600 | -2.64233500 L |
| C-C_R | 21.69090300 | -21.09306700 | -2.48084100 L |
| N-N_R | 20.71649900 | -20.37793600 | -1.93799100 L |
| C-C_R | 23.00471500 | -20.42543800 | -2.51286600 L |
| C-C_R | 24.20554900 | -21.11519900 | -2.30508200 L |
| C-C_R | 23.06096900 | -19.03572800 | -2.67310000 L |
| C-C_R | 25.41673500 | -20.45067000 | -2.29615200 L |
| H-H_  | 24.18711500 | -22.18076800 | -2.11840300 L |
| H-H_  | 22.13306600 | -18.49063600 | -2.79490100 L |
| C-C_R | 24.27049000 | -18.36597400 | -2.68389100 L |
| H-H_  | 26.33389200 | -20.99514600 | -2.11030300 L |
| C-C_R | 25.46763400 | -19.06740600 | -2.50211100 L |
| H-H_  | 24.29615300 | -17.29407900 | -2.83786400 L |
| N-N_R | 26.70083800 | -18.39680100 | -2.51741500 L |
| C-C_R | 27.81659200 | -18.99320200 | -3.13480600 L |
| C-C_R | 26.82122800 | -17.12465100 | -1.92486000 L |
| C-C_R | 27.66942800 | -19.69006000 | -4.33831100 L |
| C-C_R | 29.08608800 | -18.89337000 | -2.55549800 L |
| C-C_R | 27.58743000 | -16.12758200 | -2.53666200 L |
| C-C_R | 26.17228500 | -16.84402600 | -0.71816200 L |
| H-H_  | 26.68800200 | -19.76130500 | -4.79355600 L |
| C-C_R | 28.76862300 | -20.27653000 | -4.94411800 L |
| H-H_  | 29.20278100 | -18.36247400 | -1.61963900 L |
| C-C_R | 30.18067500 | -19.47382400 | -3.17615700 L |
| H-H_  | 28.08202900 | -16.33782300 | -3.47823000 L |
| C-C_R | 27.70489500 | -14.88030000 | -1.94553000 L |
| H-H_  | 25.58329200 | -17.61604700 | -0.23770500 L |
| C-C_R | 26.28482200 | -15.58737700 | -0.14426300 L |
| H-H_  | 28.63615700 | -20.80871000 | -5.87923900 L |
| C-C_R | 30.03110400 | -20.17022700 | -4.37071800 L |
| H-H_  | 31.15937500 | -19.39090200 | -2.71419100 L |

|       |             |              |               |
|-------|-------------|--------------|---------------|
| C-C_R | 27.05339300 | -14.60048900 | -0.74887200 L |
| H-H_  | 28.29919200 | -14.11524900 | -2.43315000 L |
| H-H_  | 25.77489300 | -15.38424000 | 0.79063200 L  |
| H-H_  | 30.89068800 | -20.62355200 | -4.85013400 L |
| H-H_  | 27.14143400 | -13.62049900 | -0.29472300 L |
| C-C_R | 13.29937300 | -29.46446400 | 7.61152100 L  |
| H-H_  | 14.26003300 | -29.91008700 | 7.84620100 L  |
| C-C_R | 10.97328400 | -29.68670400 | 7.06146100 L  |
| H-H_  | 10.10947000 | -30.30627800 | 6.84937300 L  |
| C-C_R | 12.19811200 | -30.27478700 | 7.35449600 L  |
| H-H_  | 12.29575600 | -31.35326500 | 7.38055100 L  |
| C-C_R | 13.18093900 | -28.08415200 | 7.58463300 L  |
| C-C_R | 11.94970200 | -27.49219000 | 7.28196000 L  |
| H-H_  | 14.03692100 | -27.45659300 | 7.79767200 L  |
| N-N_R | 11.82735400 | -26.08916100 | 7.24347100 L  |
| C-C_R | 10.84620200 | -28.30667800 | 7.01727700 L  |
| C-C_R | 12.85259100 | -25.30705600 | 6.68864200 L  |
| C-C_R | 10.66999000 | -25.46959600 | 7.75165600 L  |
| H-H_  | 9.89469400  | -27.85103500 | 6.77068700 L  |
| C-C_R | 13.20929100 | -24.08726700 | 7.27480500 L  |
| C-C_R | 13.54112400 | -25.73597000 | 5.54722000 L  |
| C-C_R | 10.07775000 | -25.93420400 | 8.93138200 L  |
| C-C_R | 10.09549200 | -24.38658300 | 7.08100600 L  |
| H-H_  | 12.71294400 | -23.76900700 | 8.18256500 L  |
| C-C_R | 14.20183300 | -23.30673500 | 6.71628500 L  |
| H-H_  | 13.27831600 | -26.67935200 | 5.08664500 L  |
| C-C_R | 14.54518000 | -24.95562300 | 5.00410800 L  |
| C-C_R | 8.93215600  | -25.32567600 | 9.41993000 L  |
| H-H_  | 10.52596700 | -26.76674900 | 9.45913400 L  |
| H-H_  | 10.54696200 | -24.03188200 | 6.16202200 L  |
| C-C_R | 8.95644500  | -23.77859900 | 7.58386700 L  |
| C-C_R | 14.87657100 | -23.71386100 | 5.55908400 L  |
| H-H_  | 14.47812600 | -22.37791800 | 7.19990400 L  |
| H-H_  | 15.09076900 | -25.29609800 | 4.13320900 L  |
| H-H_  | 8.48671200  | -25.69243400 | 10.33835400 L |
| C-C_R | 8.36584300  | -24.24429800 | 8.75469700 L  |
| H-H_  | 8.52301400  | -22.94248400 | 7.04906800 L  |
| C-C_R | 15.97322800 | -22.92874400 | 4.96150000 L  |
| H-H_  | 7.47077100  | -23.77244500 | 9.14065500 L  |
| N-N_R | 16.96057000 | -23.65219200 | 4.45307900 L  |
| C-C_R | 16.04198200 | -21.50639900 | 4.95301400 L  |
| C-C_R | 18.06840000 | -23.03557600 | 4.02886300 L  |
| N-N_R | 17.17035400 | -20.89149200 | 4.62609700 L  |
| C-C_R | 14.90947200 | -20.60685100 | 5.23953100 L  |



|       |             |              |               |
|-------|-------------|--------------|---------------|
| C-C_R | 18.20924100 | -21.61761600 | 4.19978000 L  |
| C-C_R | 19.11474600 | -23.78339000 | 3.43705300 L  |
| C-C_R | 13.59318200 | -20.91224600 | 4.87029700 L  |
| C-C_R | 15.15766900 | -19.36091000 | 5.82712900 L  |
| C-C_R | 19.43719100 | -20.98669600 | 3.89080500 L  |
| C-C_R | 20.32020200 | -23.14053800 | 3.07188600 L  |
| C-C_R | 18.95417700 | -25.17371500 | 3.21234900 L  |
| C-C_R | 12.56108800 | -20.02767900 | 5.11171200 L  |
| H-H_  | 13.38227000 | -21.84369800 | 4.35946800 L  |
| H-H_  | 16.17840500 | -19.10125700 | 6.07898500 L  |
| C-C_R | 14.12835700 | -18.47651700 | 6.08976300 L  |
| C-C_R | 20.50534200 | -21.74546500 | 3.35707800 L  |
| C-C_R | 19.59773400 | -19.59626500 | 4.11650400 L  |
| N-N_R | 18.82232700 | -26.31117700 | 3.02756400 L  |
| H-H_  | 11.55282800 | -20.26781000 | 4.79871500 L  |
| C-C_R | 12.81166000 | -18.80188200 | 5.74077800 L  |
| H-H_  | 14.33464900 | -17.52911000 | 6.57159000 L  |
| N-N_R | 19.72958500 | -18.45880300 | 4.30128800 L  |
| N-N_R | 11.75760400 | -17.91379700 | 6.00942000 L  |
| C-C_R | 10.51598700 | -18.40965900 | 6.44938800 L  |
| C-C_R | 11.94438100 | -16.52650800 | 5.84878100 L  |
| C-C_R | 10.46199100 | -19.46255900 | 7.36925300 L  |
| C-C_R | 9.32292800  | -17.85492300 | 5.97664300 L  |
| C-C_R | 11.39751400 | -15.62733300 | 6.76816000 L  |
| C-C_R | 12.68330800 | -16.03544900 | 4.76757500 L  |
| H-H_  | 11.38550400 | -19.88711100 | 7.74357600 L  |
| C-C_R | 9.23866200  | -19.94821300 | 7.80054400 L  |
| H-H_  | 9.36031100  | -17.04640200 | 5.25772300 L  |
| C-C_R | 8.10391700  | -18.34141400 | 6.42423300 L  |
| H-H_  | 10.83496600 | -16.00568600 | 7.61338500 L  |
| C-C_R | 11.58101500 | -14.26339000 | 6.59988800 L  |
| H-H_  | 13.10321300 | -16.72942700 | 4.04820600 L  |
| C-C_R | 12.87259000 | -14.67075000 | 4.61848700 L  |
| H-H_  | 9.21580300  | -20.76190200 | 8.51737700 L  |
| C-C_R | 8.05195700  | -19.39120500 | 7.33476100 L  |
| H-H_  | 7.18664300  | -17.90422300 | 6.04669800 L  |
| C-C_R | 12.32133300 | -13.77635400 | 5.52921300 L  |
| H-H_  | 11.15447300 | -13.57837900 | 7.32307000 L  |
| H-H_  | 13.44812600 | -14.30477400 | 3.77593500 L  |
| H-H_  | 7.09732900  | -19.76857900 | 7.67981600 L  |
| H-H_  | 12.46902300 | -12.70992200 | 5.40613400 L  |
| C-C_R | 23.67020700 | -29.02147800 | -2.50701900 L |
| H-H_  | 22.64317100 | -29.14560400 | -2.83399300 L |
| C-C_R | 25.86782400 | -29.91378200 | -2.13808700 L |

|       |             |              |               |
|-------|-------------|--------------|---------------|
| H-H_  | 26.56308700 | -30.74479700 | -2.16051900 L |
| C-C_R | 24.55258900 | -30.09360400 | -2.55502000 L |
| H-H_  | 24.22077900 | -31.06038100 | -2.91323600 L |
| C-C_R | 24.09109800 | -27.78120500 | -2.05522100 L |
| C-C_R | 25.41091100 | -27.60135500 | -1.62710600 L |
| H-H_  | 23.40420300 | -26.94276500 | -2.02934900 L |
| N-N_R | 25.84058400 | -26.34365100 | -1.15784300 L |
| C-C_R | 26.29582000 | -28.68236800 | -1.66905500 L |
| C-C_R | 24.99447100 | -25.56695900 | -0.34868100 L |
| C-C_R | 27.12370500 | -25.87246100 | -1.48945200 L |
| H-H_  | 27.31530400 | -28.54952400 | -1.32711600 L |
| C-C_R | 24.93915900 | -24.17930200 | -0.51357800 L |
| C-C_R | 24.18768400 | -26.16647800 | 0.62474000 L  |
| C-C_R | 27.63948200 | -26.06231400 | -2.77474600 L |
| C-C_R | 27.89923000 | -25.20711600 | -0.53501300 L |
| H-H_  | 25.52674200 | -23.71155400 | -1.29433700 L |
| C-C_R | 24.12568400 | -23.41063000 | 0.29628000 L  |
| H-H_  | 24.21726300 | -27.24086900 | 0.75726200 L  |
| C-C_R | 23.36243000 | -25.39255000 | 1.41964400 L  |
| C-C_R | 28.90888700 | -25.60323900 | -3.09131800 L |
| H-H_  | 27.03795900 | -26.56855100 | -3.51948500 L |
| H-H_  | 27.50646900 | -25.06549200 | 0.46384900 L  |
| C-C_R | 29.16256900 | -24.74168300 | -0.86450000 L |
| C-C_R | 23.33549100 | -23.99866000 | 1.29203200 L  |
| H-H_  | 24.07953300 | -22.34189700 | 0.13577000 L  |
| H-H_  | 22.72464500 | -25.85758400 | 2.16058600 L  |
| H-H_  | 29.29439500 | -25.75510900 | -4.09228300 L |
| C-C_R | 29.67747700 | -24.93768100 | -2.14110600 L |
| H-H_  | 29.75273400 | -24.23205700 | -0.11136200 L |
| C-C_R | 22.42093200 | -23.21607200 | 2.14306600 L  |
| H-H_  | 30.66751200 | -24.58044900 | -2.39454400 L |
| N-N_R | 21.27879900 | -23.82308400 | 2.43758900 L  |
| C-C_R | 22.66914000 | -21.88908600 | 2.59818800 L  |
| N-N_R | 21.69407300 | -21.17308400 | 3.14193400 L  |
| C-C_R | 23.98228900 | -21.22058600 | 2.56705900 L  |
| C-C_R | 25.18312400 | -21.91034800 | 2.77484200 L  |
| C-C_R | 24.03854400 | -19.83087600 | 2.40682400 L  |
| C-C_R | 26.39431000 | -21.24581800 | 2.78377300 L  |
| H-H_  | 25.16471500 | -22.97602400 | 2.96052700 L  |
| H-H_  | 23.11064100 | -19.28578400 | 2.28502400 L  |
| C-C_R | 25.24806500 | -19.16112200 | 2.39603300 L  |
| H-H_  | 27.31210400 | -21.79105900 | 2.96972000 L  |
| C-C_R | 26.44584600 | -19.86331800 | 2.57791200 L  |
| H-H_  | 25.27436500 | -18.08999100 | 2.24215900 L  |

|       |              |              |               |
|-------|--------------|--------------|---------------|
| N-N_R | 27.67905000  | -19.19271400 | 2.56260800 L  |
| C-C_R | 28.79419200  | -19.78845700 | 1.94412400 L  |
| C-C_R | 27.79880300  | -17.91979900 | 3.15506400 L  |
| C-C_R | 28.64700300  | -20.48520800 | 0.74161300 L  |
| C-C_R | 30.06368900  | -19.68862600 | 2.52343200 L  |
| C-C_R | 28.56564200  | -16.92349500 | 2.54336100 L  |
| C-C_R | 27.14986000  | -17.63917400 | 4.36176200 L  |
| H-H_  | 27.66557600  | -20.55645300 | 0.28636800 L  |
| C-C_R | 29.74619800  | -21.07167800 | 0.13580600 L  |
| H-H_  | 30.18099300  | -19.15838600 | 3.46038400 L  |
| C-C_R | 31.15888700  | -20.26973700 | 1.90386600 L  |
| H-H_  | 29.06024100  | -17.13373600 | 1.60179300 L  |
| C-C_R | 28.68247000  | -15.67544800 | 3.13439400 L  |
| H-H_  | 26.56150400  | -18.41195900 | 4.84231800 L  |
| C-C_R | 27.26303400  | -16.38328900 | 4.93576000 L  |
| H-H_  | 29.61373100  | -21.60385900 | -0.79931500 L |
| C-C_R | 31.00931600  | -20.96614000 | 0.70930500 L  |
| H-H_  | 32.13694900  | -20.18605000 | 2.36573300 L  |
| C-C_R | 28.03099400  | -15.39574400 | 4.33005900 L  |
| H-H_  | 29.27676700  | -14.91039700 | 2.64677400 L  |
| H-H_  | 26.75313100  | -16.18025900 | 5.86966100 L  |
| H-H_  | 31.86828800  | -21.41880700 | 0.22879600 L  |
| H-H_  | 28.11964600  | -14.41641200 | 4.78530000 L  |
| C-C_R | -27.96288000 | -22.84697000 | -4.10113400 L |
| H-H_  | -27.00285700 | -23.29182800 | -3.86655300 L |
| C-C_R | -30.28960600 | -23.06844500 | -4.65129200 L |
| H-H_  | -31.15201300 | -23.68814800 | -4.86333100 L |
| C-C_R | -29.06400800 | -23.65589300 | -4.35830600 L |
| H-H_  | -28.96716000 | -24.73490000 | -4.33120900 L |
| C-C_R | -28.08195200 | -21.46589400 | -4.12812100 L |
| C-C_R | -29.31241800 | -20.87329600 | -4.43084200 L |
| H-H_  | -27.22519900 | -20.83769900 | -3.91513000 L |
| N-N_R | -29.43553600 | -19.47090300 | -4.46928300 L |
| C-C_R | -30.41528100 | -21.68854800 | -4.69542600 L |
| C-C_R | -28.40889200 | -18.68892600 | -5.02406200 L |
| C-C_R | -30.59226300 | -18.85210200 | -3.96099900 L |
| H-H_  | -31.36819700 | -21.23277700 | -4.94206700 L |
| C-C_R | -28.05359900 | -17.46900800 | -4.43794900 L |
| C-C_R | -27.72102200 | -19.11696900 | -6.16458900 L |
| C-C_R | -31.18373300 | -19.31607400 | -2.78132200 L |
| C-C_R | -31.16599100 | -17.76845300 | -4.63169800 L |
| H-H_  | -28.54933500 | -17.15140600 | -3.52909600 L |
| C-C_R | -27.06028700 | -16.68784100 | -4.99651700 L |
| H-H_  | -27.98393700 | -20.06185800 | -6.62601000 L |

|       |              |              |               |
|-------|--------------|--------------|---------------|
| C-C_R | -26.71707300 | -18.33812900 | -6.70854700 L |
| C-C_R | -32.32999000 | -18.70667500 | -2.29187800 L |
| H-H_  | -30.73692400 | -20.14849100 | -2.25362000 L |
| H-H_  | -30.71515800 | -17.41298700 | -5.55078000 L |
| C-C_R | -32.30580800 | -17.16110500 | -4.12878800 L |
| C-C_R | -26.38491200 | -17.09573100 | -6.15362000 L |
| H-H_  | -26.78335700 | -15.75978800 | -4.51280000 L |
| H-H_  | -26.17137700 | -18.67709700 | -7.57859900 L |
| H-H_  | -32.77617800 | -19.07417600 | -1.37439900 L |
| C-C_R | -32.89704800 | -17.62604000 | -2.95805700 L |
| H-H_  | -32.73987700 | -16.32422600 | -4.66368600 L |
| C-C_R | -25.28968800 | -16.31037900 | -6.75026000 L |
| H-H_  | -33.79214500 | -17.15408000 | -2.57110400 L |
| N-N_R | -24.30155000 | -17.03329700 | -7.25972300 L |
| C-C_R | -25.22013800 | -14.88750500 | -6.75978800 L |
| C-C_R | -23.19308300 | -16.41744600 | -7.68384000 L |
| N-N_R | -24.09112900 | -14.27336200 | -7.08660700 L |
| C-C_R | -26.35264800 | -13.98795700 | -6.47327100 L |
| C-C_R | -23.05287900 | -14.99872200 | -7.51302200 L |
| C-C_R | -22.14817000 | -17.16502500 | -8.27470600 L |
| C-C_R | -27.66893800 | -14.29335200 | -6.84250500 L |
| C-C_R | -26.10445200 | -12.74201600 | -5.88567300 L |
| C-C_R | -21.82495500 | -14.36769500 | -7.82100300 L |
| C-C_R | -20.94128000 | -16.52240800 | -8.64081800 L |
| C-C_R | -22.30794300 | -18.55482100 | -8.50045400 L |
| C-C_R | -28.70105800 | -13.40867800 | -6.60009600 L |
| H-H_  | -27.87985100 | -15.22480400 | -7.35333400 L |
| H-H_  | -25.08371500 | -12.48236300 | -5.63381700 L |
| C-C_R | -27.13453300 | -11.85825900 | -5.62299100 L |
| C-C_R | -20.75754900 | -15.12720700 | -8.35567600 L |
| C-C_R | -21.66451900 | -12.97877100 | -7.59615100 L |
| N-N_R | -22.43915600 | -19.69304700 | -8.68513900 L |
| H-H_  | -29.70945000 | -13.65020900 | -6.91294600 L |
| C-C_R | -28.45061900 | -12.18428100 | -5.97088300 L |
| H-H_  | -26.92760400 | -10.91161600 | -5.14106400 L |
| N-N_R | -21.53330500 | -11.84054500 | -7.41146500 L |
| N-N_R | -29.50528600 | -11.29553800 | -5.70333400 L |
| C-C_R | -30.74613400 | -11.79076400 | -5.26341400 L |
| C-C_R | -29.31773900 | -9.90761400  | -5.86402200 L |
| C-C_R | -30.80013000 | -12.84366500 | -4.34354900 L |
| C-C_R | -31.93921800 | -11.23592100 | -5.73516500 L |
| C-C_R | -29.86537600 | -9.00907500  | -4.94459400 L |
| C-C_R | -28.57958200 | -9.41719100  | -6.94517900 L |
| H-H_  | -29.87674900 | -13.26961700 | -3.96907900 L |

|       |              |              |                |
|-------|--------------|--------------|----------------|
| C-C_R | -32.02359000 | -13.33071900 | -3.91211100 L  |
| H-H_  | -31.90180900 | -10.42750800 | -6.45508000 L  |
| C-C_R | -33.15756600 | -11.72328400 | -5.28847000 L  |
| H-H_  | -30.42715400 | -9.38679200  | -4.09941700 L  |
| C-C_R | -29.68190100 | -7.64502400  | -5.11187100 L  |
| H-H_  | -28.15970200 | -10.11106200 | -7.66355400 L  |
| C-C_R | -28.38953000 | -8.05185500  | -7.09431500 L  |
| H-H_  | -32.04631800 | -14.14300700 | -3.19542600 L  |
| C-C_R | -33.20952600 | -12.77307500 | -4.37794300 L  |
| H-H_  | -34.07547700 | -11.28532800 | -5.66610400 L  |
| C-C_R | -28.94015000 | -7.15822400  | -6.18349100 L  |
| H-H_  | -30.10764700 | -6.95948500  | -4.38973200 L  |
| H-H_  | -27.81399500 | -7.68587900  | -7.93686800 L  |
| H-H_  | -34.16556100 | -13.15032000 | -4.03293800 L  |
| H-H_  | -28.79386700 | -6.09166400  | -6.30662000 L  |
| C-C_R | -17.59268300 | -22.40322000 | -14.21977200 L |
| H-H_  | -18.61833800 | -22.52736700 | -14.54570300 L |
| C-C_R | -15.39509200 | -23.29541700 | -13.84984700 L |
| H-H_  | -14.69916600 | -24.12730300 | -13.87317400 L |
| C-C_R | -16.70892000 | -23.47536700 | -14.26673000 L |
| H-H_  | -17.04211100 | -24.44212300 | -14.62598900 L |
| C-C_R | -17.17181800 | -21.16284000 | -13.76698100 L |
| C-C_R | -15.85120900 | -20.98246100 | -13.33990800 L |
| H-H_  | -17.85805000 | -20.32527100 | -13.74200300 L |
| N-N_R | -15.42166900 | -19.72615700 | -12.87049700 L |
| C-C_R | -14.96630000 | -22.06347400 | -13.38185700 L |
| C-C_R | -16.26701200 | -18.94882900 | -12.06138500 L |
| C-C_R | -14.13841500 | -19.25356700 | -13.20225400 L |
| H-H_  | -13.94758600 | -21.93126500 | -13.03986900 L |
| C-C_R | -16.32298600 | -17.56030100 | -12.22538700 L |
| C-C_R | -17.07446200 | -19.54747700 | -11.08706900 L |
| C-C_R | -13.62263800 | -19.44342000 | -14.48754800 L |
| C-C_R | -13.36289000 | -18.58822200 | -12.24781500 L |
| H-H_  | -15.73617400 | -17.09318900 | -13.00609700 L |
| C-C_R | -17.13656900 | -16.79313600 | -11.41637500 L |
| H-H_  | -17.04485700 | -20.62197500 | -10.95554000 L |
| C-C_R | -17.89969000 | -18.77365600 | -10.29315800 L |
| C-C_R | -12.35323300 | -18.98434500 | -14.80412000 L |
| H-H_  | -14.22416100 | -19.94965600 | -15.23228700 L |
| H-H_  | -13.75565100 | -18.44659800 | -11.24895300 L |
| C-C_R | -12.09955200 | -18.12278800 | -12.57730200 L |
| C-C_R | -17.92665500 | -17.37965900 | -10.41977600 L |
| H-H_  | -17.18335700 | -15.72363900 | -11.57698400 L |
| H-H_  | -18.53747500 | -19.23868900 | -9.55221600 L  |

|       |              |              |                |
|-------|--------------|--------------|----------------|
| H-H_  | -11.96849500 | -19.13685100 | -15.80503600 L |
| C-C_R | -11.58477600 | -18.32018700 | -13.85376000 L |
| H-H_  | -11.50938600 | -17.61316300 | -11.82416400 L |
| C-C_R | -18.84195900 | -16.59781300 | -9.56968800 L  |
| H-H_  | -10.59460800 | -17.96155500 | -14.10734600 L |
| N-N_R | -19.98268300 | -17.20495400 | -9.27511400 L  |
| C-C_R | -18.59377600 | -15.27072100 | -9.11357100 L  |
| N-N_R | -19.56881700 | -14.55482600 | -8.57082000 L  |
| C-C_R | -17.28060100 | -14.60232800 | -9.14569500 L  |
| C-C_R | -16.07899600 | -15.29145400 | -8.93796000 L  |
| C-C_R | -17.22357600 | -13.21198200 | -9.30597800 L  |
| C-C_R | -14.86717300 | -14.62768800 | -8.92893100 L  |
| H-H_  | -16.09679300 | -16.35778700 | -8.75118200 L  |
| H-H_  | -18.15161200 | -12.66829000 | -9.42763100 L  |
| C-C_R | -16.01482500 | -12.54286400 | -9.31672000 L  |
| H-H_  | -13.95001600 | -15.17216500 | -8.74308200 L  |
| C-C_R | -14.81704500 | -13.24506000 | -9.13484200 L  |
| H-H_  | -15.98852500 | -11.47173300 | -9.47059400 L  |
| N-N_R | -13.58386500 | -12.57434900 | -9.14915100 L  |
| C-C_R | -12.46795300 | -13.16945600 | -9.76768400 L  |
| C-C_R | -13.46408700 | -11.30154100 | -8.55768900 L  |
| C-C_R | -12.61591300 | -13.86684300 | -10.97014600 L |
| C-C_R | -11.19922700 | -13.07026000 | -9.18832700 L  |
| C-C_R | -12.69647800 | -10.30460100 | -9.16944200 L  |
| C-C_R | -14.11226000 | -11.02028000 | -7.35104000 L  |
| H-H_  | -13.59590600 | -13.93832300 | -11.42633500 L |
| C-C_R | -11.51528500 | -14.45354800 | -11.57689800 L |
| H-H_  | -11.08189700 | -12.54012800 | -8.25237000 L  |
| C-C_R | -10.10323300 | -13.65084300 | -9.80893600 L  |
| H-H_  | -12.20264900 | -10.51547800 | -10.11096100 L |
| C-C_R | -12.57901300 | -9.05731800  | -8.57831000 L  |
| H-H_  | -14.70061600 | -11.79306500 | -6.87048400 L  |
| C-C_R | -13.99908600 | -9.76439500  | -6.77704200 L  |
| H-H_  | -11.64852100 | -14.98636500 | -12.51197000 L |
| C-C_R | -10.25357400 | -14.34788200 | -11.00344900 L |
| H-H_  | -9.12594100  | -13.56779200 | -9.34702000 L  |
| C-C_R | -13.23051500 | -8.77750700  | -7.38165100 L  |
| H-H_  | -11.98471600 | -8.29226700  | -9.06592900 L  |
| H-H_  | -14.50901500 | -9.56125800  | -5.84214700 L  |
| H-H_  | -9.39385800  | -14.79980600 | -11.48301200 L |
| H-H_  | -13.14324400 | -7.79815400  | -6.92745400 L  |
| C-C_R | -26.98530500 | -23.64211800 | 0.97879000 L   |
| H-H_  | -26.02464500 | -24.08774100 | 1.21347000 L   |
| C-C_R | -29.31139400 | -23.86435800 | 0.42873100 L   |

|       |              |              |               |
|-------|--------------|--------------|---------------|
| H-H_  | -30.17443800 | -24.48329700 | 0.21659400 L  |
| C-C_R | -28.08643300 | -24.45104100 | 0.72161900 L  |
| H-H_  | -27.98894700 | -25.53081300 | 0.74881400 L  |
| C-C_R | -27.10374000 | -22.26180700 | 0.95190200 L  |
| C-C_R | -28.33420600 | -21.66920900 | 0.64918100 L  |
| H-H_  | -26.24762400 | -21.63284700 | 1.16479400 L  |
| N-N_R | -28.45732400 | -20.26681600 | 0.61074000 L  |
| C-C_R | -29.43770600 | -22.48369600 | 0.38449800 L  |
| C-C_R | -27.43131700 | -19.48407500 | 0.05586200 L  |
| C-C_R | -29.61468800 | -19.64725000 | 1.11892600 L  |
| H-H_  | -30.38998500 | -22.02868900 | 0.13795600 L  |
| C-C_R | -27.07538700 | -18.26492100 | 0.64207400 L  |
| C-C_R | -26.74278400 | -19.91298800 | -1.08555900 L |
| C-C_R | -30.20615800 | -20.11122200 | 2.29860300 L  |
| C-C_R | -30.18841600 | -18.56360100 | 0.44822700 L  |
| H-H_  | -27.57176000 | -17.94655500 | 1.55082800 L  |
| C-C_R | -26.08271200 | -17.48298900 | 0.08340800 L  |
| H-H_  | -27.00636200 | -20.85700700 | -1.54608600 L |
| C-C_R | -25.73949800 | -19.13327700 | -1.62862200 L |
| C-C_R | -31.35241500 | -19.50182300 | 2.78804600 L  |
| H-H_  | -29.75934900 | -20.94363900 | 2.82630500 L  |
| H-H_  | -29.73758300 | -18.20813600 | -0.47085600 L |
| C-C_R | -31.32823300 | -17.95625300 | 0.95113600 L  |
| C-C_R | -25.40733700 | -17.89088000 | -1.07369600 L |
| H-H_  | -25.80578200 | -16.55493700 | 0.56712500 L  |
| H-H_  | -25.19377700 | -19.47235300 | -2.49966900 L |
| H-H_  | -31.79796600 | -19.87008900 | 3.70562400 L  |
| C-C_R | -31.91947300 | -18.42118800 | 2.12186800 L  |
| H-H_  | -31.76230200 | -17.11937400 | 0.41623900 L  |
| C-C_R | -24.31208800 | -17.10563400 | -1.67133000 L |
| H-H_  | -32.81457000 | -17.94922900 | 2.50882000 L  |
| N-N_R | -23.32397500 | -17.82844600 | -2.17979900 L |
| C-C_R | -24.24192600 | -15.68341800 | -1.67976500 L |
| C-C_R | -22.21550800 | -17.21259400 | -2.60391600 L |
| N-N_R | -23.11355400 | -15.06851100 | -2.00668200 L |
| C-C_R | -25.37443600 | -14.78386900 | -1.39324800 L |
| C-C_R | -22.07466700 | -15.79463500 | -2.43299900 L |
| C-C_R | -21.16995800 | -17.96093800 | -3.19468300 L |
| C-C_R | -26.69072600 | -15.08926500 | -1.76248200 L |
| C-C_R | -25.12687700 | -13.53716400 | -0.80574900 L |
| C-C_R | -20.84674300 | -15.16360800 | -2.74098000 L |
| C-C_R | -19.96370600 | -17.31755600 | -3.56089400 L |
| C-C_R | -21.33036800 | -19.34996900 | -3.42052900 L |
| C-C_R | -27.72282000 | -14.20469800 | -1.52106700 L |

|       |              |              |               |
|-------|--------------|--------------|---------------|
| H-H_  | -26.90163800 | -16.02071600 | -2.27331100 L |
| H-H_  | -24.10614000 | -13.27751200 | -0.55389300 L |
| C-C_R | -26.15695800 | -12.65340700 | -0.54306700 L |
| C-C_R | -19.77933700 | -15.92311900 | -3.27565300 L |
| C-C_R | -20.68694400 | -13.77391900 | -2.51622700 L |
| N-N_R | -21.46158200 | -20.48819500 | -3.60521500 L |
| H-H_  | -28.73187500 | -14.44535700 | -1.83302100 L |
| C-C_R | -27.47304400 | -12.97943000 | -0.89095900 L |
| H-H_  | -25.95003000 | -11.70676500 | -0.06114000 L |
| N-N_R | -20.55509300 | -12.63645800 | -2.33144200 L |
| N-N_R | -28.52771100 | -12.09068700 | -0.62340900 L |
| C-C_R | -29.76792100 | -12.58667700 | -0.18339100 L |
| C-C_R | -28.33952700 | -10.70352600 | -0.78399800 L |
| C-C_R | -29.82255500 | -13.63881300 | 0.73637500 L  |
| C-C_R | -30.96161800 | -12.03117700 | -0.65623500 L |
| C-C_R | -28.88716400 | -9.80498700  | 0.13542900 L  |
| C-C_R | -27.60137000 | -10.21310300 | -1.86515500 L |
| H-H_  | -28.89917500 | -14.06476500 | 1.11084500 L  |
| C-C_R | -31.04601600 | -14.12586800 | 1.16781400 L  |
| H-H_  | -30.92423400 | -11.22265600 | -1.37515500 L |
| C-C_R | -32.17999100 | -12.51843200 | -0.20854600 L |
| H-H_  | -29.44894200 | -10.18270400 | 0.98060600 L  |
| C-C_R | -28.70432700 | -8.44017300  | -0.03194700 L |
| H-H_  | -27.18210200 | -10.90631700 | -2.58462300 L |
| C-C_R | -27.41195500 | -8.84700400  | -2.01439100 L |
| H-H_  | -31.06874300 | -14.93815600 | 1.88449900 L  |
| C-C_R | -32.23195100 | -13.56822300 | 0.70198100 L  |
| H-H_  | -33.09790200 | -12.08047700 | -0.58618000 L |
| C-C_R | -27.96257500 | -7.95337200  | -1.10356600 L |
| H-H_  | -29.13007200 | -7.75463300  | 0.69019300 L  |
| H-H_  | -26.83642000 | -8.48102800  | -2.85694300 L |
| H-H_  | -33.18798700 | -13.94546900 | 1.04698600 L  |
| H-H_  | -27.81565500 | -6.88757700  | -1.22659700 L |
| C-C_R | -16.61510800 | -23.19836800 | -9.13984800 L |
| H-H_  | -17.64076300 | -23.32251500 | -9.46577800 L |
| C-C_R | -14.41685400 | -24.09143600 | -8.77081800 L |
| H-H_  | -13.72159100 | -24.92245200 | -8.79324900 L |
| C-C_R | -15.73132000 | -24.27062200 | -9.18779900 L |
| H-H_  | -16.06453700 | -25.23727100 | -9.54606500 L |
| C-C_R | -16.19424400 | -21.95798800 | -8.68705600 L |
| C-C_R | -14.87363400 | -21.77760900 | -8.25998400 L |
| H-H_  | -16.88047500 | -21.12042000 | -8.66207900 L |
| N-N_R | -14.44409500 | -20.52130600 | -7.79057300 L |
| C-C_R | -13.98872500 | -22.85862200 | -8.30193300 L |



|       |              |              |                |
|-------|--------------|--------------|----------------|
| C-C_R | -15.28943700 | -19.74397800 | -6.98146000 L  |
| C-C_R | -13.16084000 | -20.04871600 | -8.12233000 L  |
| H-H_  | -12.96937400 | -22.72717800 | -7.95984600 L  |
| C-C_R | -15.34477400 | -18.35621300 | -7.14536400 L  |
| C-C_R | -16.09625000 | -20.34338900 | -6.00704600 L  |
| C-C_R | -12.64442600 | -20.23933300 | -9.40752500 L  |
| C-C_R | -12.38531600 | -19.38337000 | -7.16789100 L  |
| H-H_  | -14.75857400 | -17.88844500 | -7.92716600 L  |
| C-C_R | -16.15899400 | -17.58828500 | -6.33645000 L  |
| H-H_  | -16.06728300 | -21.41712300 | -5.87561600 L  |
| C-C_R | -16.92147800 | -19.56956800 | -5.21313500 L  |
| C-C_R | -11.37565800 | -19.77949300 | -9.72419600 L  |
| H-H_  | -13.24658600 | -20.74480500 | -10.15236300 L |
| H-H_  | -12.77807600 | -19.24174600 | -6.16902800 L  |
| C-C_R | -11.12197700 | -18.91793700 | -7.49737700 L  |
| C-C_R | -16.94844300 | -18.17557200 | -5.33975300 L  |
| H-H_  | -16.20578200 | -16.51878800 | -6.49706000 L  |
| H-H_  | -17.55990000 | -20.03383800 | -4.47229100 L  |
| H-H_  | -10.99092000 | -19.93199900 | -10.72511200 L |
| C-C_R | -10.60720100 | -19.11533500 | -8.77383600 L  |
| H-H_  | -10.53117400 | -18.40907600 | -6.74414100 L  |
| C-C_R | -17.86438400 | -17.39296200 | -4.48976400 L  |
| H-H_  | -9.61639600  | -18.75746700 | -9.02732300 L  |
| N-N_R | -19.00510900 | -18.00010200 | -4.19519000 L  |
| C-C_R | -17.61620100 | -16.06587000 | -4.03364700 L  |
| N-N_R | -18.59060500 | -15.35073900 | -3.49079700 L  |
| C-C_R | -16.30238900 | -15.39824100 | -4.06567200 L  |
| C-C_R | -15.10078400 | -16.08736600 | -3.85793700 L  |
| C-C_R | -16.24536400 | -14.00789500 | -4.22595500 L  |
| C-C_R | -13.88959800 | -15.42283700 | -3.84900600 L  |
| H-H_  | -15.11921800 | -17.15293500 | -3.67125800 L  |
| H-H_  | -17.17403700 | -13.46343800 | -4.34770700 L  |
| C-C_R | -15.03725100 | -13.33801300 | -4.23679600 L  |
| H-H_  | -12.97244100 | -15.96731300 | -3.66315800 L  |
| C-C_R | -13.83947000 | -14.04020800 | -4.05491700 L  |
| H-H_  | -15.01095000 | -12.26688100 | -4.39067000 L  |
| N-N_R | -12.60626500 | -13.36960400 | -4.07022100 L  |
| C-C_R | -11.49037900 | -13.96460500 | -4.68775900 L  |
| C-C_R | -12.48651300 | -12.09668900 | -3.47776500 L  |
| C-C_R | -11.63767500 | -14.66286300 | -5.89111700 L  |
| C-C_R | -10.22101500 | -13.86617300 | -4.10830400 L  |
| C-C_R | -11.71890300 | -11.09974900 | -4.08951700 L  |
| C-C_R | -13.13468500 | -11.81542900 | -2.27111600 L  |
| H-H_  | -12.61833200 | -14.73347100 | -6.34641100 L  |

|       |              |              |               |
|-------|--------------|--------------|---------------|
| C-C_R | -10.53771000 | -15.24869700 | -6.49697300 L |
| H-H_  | -10.10432200 | -13.33527600 | -3.17244500 L |
| C-C_R | -9.12565800  | -14.44599100 | -4.72901200 L |
| H-H_  | -11.22507400 | -11.31062600 | -5.03103600 L |
| C-C_R | -11.60143800 | -9.85246600  | -3.49838500 L |
| H-H_  | -13.72304100 | -12.58821300 | -1.79055900 L |
| C-C_R | -13.02151200 | -10.55954400 | -1.69711800 L |
| H-H_  | -10.67094700 | -15.78151300 | -7.43204500 L |
| C-C_R | -9.27600000  | -15.14303000 | -5.92352500 L |
| H-H_  | -8.14772900  | -14.36370400 | -4.26699700 L |
| C-C_R | -12.25294000 | -9.57265500  | -2.30172700 L |
| H-H_  | -11.00714100 | -9.08741600  | -3.98600500 L |
| H-H_  | -13.53144000 | -10.35640700 | -0.76222300 L |
| H-H_  | -8.41628300  | -15.59495400 | -6.40308800 L |
| H-H_  | -12.16567000 | -8.59330200  | -1.84752900 L |
| C-C_R | -26.00773000 | -24.43726600 | 6.05871500 L  |
| H-H_  | -25.04707000 | -24.88288900 | 6.29339500 L  |
| C-C_R | -28.33381900 | -24.65950600 | 5.50865500 L  |
| H-H_  | -29.19686400 | -25.27844500 | 5.29651800 L  |
| C-C_R | -27.10822100 | -25.24695400 | 5.80164200 L  |
| H-H_  | -27.01134700 | -26.32606800 | 5.82774500 L  |
| C-C_R | -26.12616500 | -23.05695500 | 6.03182700 L  |
| C-C_R | -27.35663200 | -22.46435700 | 5.72910500 L  |
| H-H_  | -25.27005000 | -22.42799500 | 6.24471800 L  |
| N-N_R | -27.47974900 | -21.06196400 | 5.69066500 L  |
| C-C_R | -28.46013100 | -23.27884500 | 5.46442300 L  |
| C-C_R | -26.45374300 | -20.27922300 | 5.13578700 L  |
| C-C_R | -28.63711400 | -20.44239900 | 6.19885000 L  |
| H-H_  | -29.41241000 | -22.82383800 | 5.21788100 L  |
| C-C_R | -26.09781300 | -19.06006900 | 5.72199900 L  |
| C-C_R | -25.76520900 | -20.70813700 | 3.99436500 L  |
| C-C_R | -29.22858300 | -20.90637000 | 7.37852700 L  |
| C-C_R | -29.21084100 | -19.35875000 | 5.52815100 L  |
| H-H_  | -26.59416000 | -18.74181000 | 6.62975800 L  |
| C-C_R | -25.10450000 | -18.27890200 | 5.16343100 L  |
| H-H_  | -26.02878700 | -21.65215500 | 3.53383900 L  |
| C-C_R | -24.76192400 | -19.92842600 | 3.45130200 L  |
| C-C_R | -30.37417700 | -20.29784300 | 7.86707500 L  |
| H-H_  | -28.78113700 | -21.73955200 | 7.90632800 L  |
| H-H_  | -28.75937100 | -19.00404800 | 4.60916700 L  |
| C-C_R | -30.35065900 | -18.75140200 | 6.03106000 L  |
| C-C_R | -24.42976300 | -18.68602800 | 4.00622900 L  |
| H-H_  | -24.82820800 | -17.35008500 | 5.64704900 L  |
| H-H_  | -24.21556500 | -20.26826500 | 2.58035400 L  |

|       |              |              |              |
|-------|--------------|--------------|--------------|
| H-H_  | -30.82039100 | -20.66523700 | 8.78554800 L |
| C-C_R | -30.94126100 | -19.21710100 | 7.20189100 L |
| H-H_  | -30.78409000 | -17.91528700 | 5.49626200 L |
| C-C_R | -23.33387600 | -17.90154700 | 3.40869300 L |
| H-H_  | -31.83633300 | -18.74524800 | 7.58784900 L |
| N-N_R | -22.34576300 | -18.62435800 | 2.90022400 L |
| C-C_R | -23.26435200 | -16.47856600 | 3.40015900 L |
| C-C_R | -21.23793300 | -18.00774200 | 2.47600800 L |
| N-N_R | -22.13598000 | -15.86365900 | 3.07324200 L |
| C-C_R | -24.39686100 | -15.57901800 | 3.68667600 L |
| C-C_R | -21.09709200 | -16.58978300 | 2.64692500 L |
| C-C_R | -20.19235700 | -18.75619300 | 1.88424700 L |
| C-C_R | -25.71315200 | -15.88441300 | 3.31744200 L |
| C-C_R | -24.14866500 | -14.33307700 | 4.27427400 L |
| C-C_R | -19.86914300 | -15.95886300 | 2.33795100 L |
| C-C_R | -18.98613100 | -18.11270500 | 1.51903100 L |
| C-C_R | -20.35215600 | -20.14588200 | 1.65949400 L |
| C-C_R | -26.74524500 | -14.99984600 | 3.55885700 L |
| H-H_  | -25.92406400 | -16.81586500 | 2.80661300 L |
| H-H_  | -23.12792800 | -14.07342400 | 4.52613000 L |
| C-C_R | -25.17874600 | -13.44932000 | 4.53695700 L |
| C-C_R | -18.80176200 | -16.71826800 | 1.80427200 L |
| C-C_R | -19.70937000 | -14.56906800 | 2.56369800 L |
| N-N_R | -20.48400700 | -21.28334300 | 1.47470900 L |
| H-H_  | -27.75427500 | -15.24061300 | 3.24590900 L |
| C-C_R | -26.49544400 | -13.77468500 | 4.18797200 L |
| H-H_  | -24.97245500 | -12.50191300 | 5.01878400 L |
| N-N_R | -19.57751900 | -13.43160600 | 2.74848200 L |
| N-N_R | -27.54949900 | -12.88659900 | 4.45661400 L |
| C-C_R | -28.79034700 | -13.38182500 | 4.89653400 L |
| C-C_R | -27.36195200 | -11.49867500 | 4.29592600 L |
| C-C_R | -28.84434300 | -14.43472600 | 5.81639800 L |
| C-C_R | -29.98340600 | -12.82708900 | 4.42378800 L |
| C-C_R | -27.90958900 | -10.60013600 | 5.21535400 L |
| C-C_R | -26.62379500 | -11.00825200 | 3.21476900 L |
| H-H_  | -27.92160000 | -14.85991400 | 6.19077000 L |
| C-C_R | -30.06844100 | -14.92101600 | 6.24773800 L |
| H-H_  | -29.94602200 | -12.01856900 | 3.70486800 L |
| C-C_R | -31.20241600 | -13.31358100 | 4.87137900 L |
| H-H_  | -28.47136700 | -10.97785300 | 6.06053000 L |
| C-C_R | -27.72608900 | -9.23619200  | 5.04708200 L |
| H-H_  | -26.20452700 | -11.70146600 | 2.49530100 L |
| C-C_R | -26.43374300 | -9.64291600  | 3.06563200 L |
| H-H_  | -30.09053100 | -15.73406800 | 6.96452200 L |

|       |              |              |               |
|-------|--------------|--------------|---------------|
| C-C_R | -31.25437600 | -14.36337200 | 5.78190600 L  |
| H-H_  | -32.11969000 | -12.87638900 | 4.49384300 L  |
| C-C_R | -26.98500100 | -8.74852100  | 3.97635800 L  |
| H-H_  | -28.15186000 | -8.55054600  | 5.77021600 L  |
| H-H_  | -25.85820800 | -9.27694000  | 2.22308000 L  |
| H-H_  | -32.20977400 | -14.74138100 | 6.12700900 L  |
| H-H_  | -26.83808000 | -7.68272500  | 3.85332800 L  |
| C-C_R | -15.63753300 | -23.99351700 | -4.05992300 L |
| H-H_  | -16.66316300 | -24.11777100 | -4.38684800 L |
| C-C_R | -13.43928000 | -24.88658500 | -3.69089300 L |
| H-H_  | -12.74401600 | -25.71760000 | -3.71332500 L |
| C-C_R | -14.75374500 | -25.06577000 | -4.10787500 L |
| H-H_  | -15.08632400 | -26.03318400 | -4.46604200 L |
| C-C_R | -15.21600600 | -22.75400800 | -3.60802700 L |
| C-C_R | -13.89605900 | -22.57275800 | -3.18005900 L |
| H-H_  | -15.90290000 | -21.91556800 | -3.58215500 L |
| N-N_R | -13.46652000 | -21.31645400 | -2.71064900 L |
| C-C_R | -13.01051300 | -23.65453500 | -3.22191000 L |
| C-C_R | -14.31186200 | -20.53912600 | -1.90153600 L |
| C-C_R | -12.18326600 | -20.84386400 | -3.04240500 L |
| H-H_  | -11.99179900 | -23.52232600 | -2.87992200 L |
| C-C_R | -14.36717400 | -19.15146900 | -2.06643300 L |
| C-C_R | -15.11864900 | -21.13864500 | -0.92811500 L |
| C-C_R | -11.66685100 | -21.03448100 | -4.32760100 L |
| C-C_R | -11.40710400 | -20.17928300 | -2.08786800 L |
| H-H_  | -13.78036200 | -18.68435700 | -2.84714300 L |
| C-C_R | -15.18141900 | -18.38343300 | -1.25652600 L |
| H-H_  | -15.08907100 | -22.21303600 | -0.79559300 L |
| C-C_R | -15.94390300 | -20.36471700 | -0.13321100 L |
| C-C_R | -10.39744600 | -20.57540600 | -4.64417300 L |
| H-H_  | -12.26837400 | -21.54071700 | -5.07234000 L |
| H-H_  | -11.79986400 | -20.03765900 | -1.08900500 L |
| C-C_R | -10.14440200 | -19.71308500 | -2.41745300 L |
| C-C_R | -15.97084300 | -18.97082700 | -0.26082300 L |
| H-H_  | -15.22757000 | -17.31470000 | -1.41703700 L |
| H-H_  | -16.58168800 | -20.82975000 | 0.60773200 L  |
| H-H_  | -10.01270800 | -20.72791200 | -5.64508900 L |
| C-C_R | -9.62962600  | -19.91048300 | -3.69391200 L |
| H-H_  | -9.55359900  | -19.20422400 | -1.66421700 L |
| C-C_R | -16.88680900 | -18.18811000 | 0.59016100 L  |
| H-H_  | -8.63882200  | -19.55261600 | -3.94739800 L |
| N-N_R | -18.02753400 | -18.79525100 | 0.88473500 L  |
| C-C_R | -16.63796300 | -16.86188900 | 1.04538200 L  |
| N-N_R | -17.61303000 | -16.14588700 | 1.58912800 L  |

|       |              |              |               |
|-------|--------------|--------------|---------------|
| C-C_R | -15.32481400 | -16.19338900 | 1.01425300 L  |
| C-C_R | -14.12320900 | -16.88251500 | 1.22198800 L  |
| C-C_R | -15.26778900 | -14.80304300 | 0.85396900 L  |
| C-C_R | -12.91202300 | -16.21798500 | 1.23091800 L  |
| H-H_  | -14.14161800 | -17.94819000 | 1.40767300 L  |
| H-H_  | -16.19646300 | -14.25858700 | 0.73221700 L  |
| C-C_R | -14.05903900 | -14.13392500 | 0.84322700 L  |
| H-H_  | -11.99422900 | -16.76322600 | 1.41686500 L  |
| C-C_R | -12.86189500 | -14.83535700 | 1.02500700 L  |
| H-H_  | -14.03273800 | -13.06279400 | 0.68935300 L  |
| N-N_R | -11.62805300 | -14.16551700 | 1.00980200 L  |
| C-C_R | -10.51214100 | -14.76062400 | 0.39127000 L  |
| C-C_R | -11.50830000 | -12.89260200 | 1.60225800 L  |
| C-C_R | -10.66010000 | -15.45801100 | -0.81119300 L |
| C-C_R | -9.24341500  | -14.66142800 | 0.97062600 L  |
| C-C_R | -10.74069100 | -11.89566200 | 0.99050600 L  |
| C-C_R | -12.15647300 | -12.61134100 | 2.80890700 L  |
| H-H_  | -11.64075700 | -15.52862000 | -1.26648600 L |
| C-C_R | -9.56013500  | -16.04384500 | -1.41704900 L |
| H-H_  | -9.12674700  | -14.13042500 | 1.90747900 L  |
| C-C_R | -8.14744600  | -15.24190400 | 0.35101100 L  |
| H-H_  | -10.24686200 | -12.10653900 | 0.04898700 L  |
| C-C_R | -10.62386300 | -10.64761500 | 1.58153900 L  |
| H-H_  | -12.74482900 | -13.38412600 | 3.28946400 L  |
| C-C_R | -12.04393700 | -11.35469200 | 3.38280700 L  |
| H-H_  | -9.69337200  | -16.57666100 | -2.35212100 L |
| C-C_R | -8.29778800  | -15.93894300 | -0.84350200 L |
| H-H_  | -7.17015400  | -15.15885300 | 0.81292700 L  |
| C-C_R | -11.27534000 | -10.36791100 | 2.77720400 L  |
| H-H_  | -10.02956700 | -9.88256400  | 1.09392000 L  |
| H-H_  | -12.55320300 | -11.15242600 | 4.31680700 L  |
| H-H_  | -7.43804500  | -16.39097400 | -1.32405900 L |
| H-H_  | -11.18745800 | -9.38921500  | 3.23249400 L  |
| C-C_R | -25.03015500 | -25.23241500 | 11.13863900 L |
| H-H_  | -24.06949600 | -25.67803800 | 11.37331900 L |
| C-C_R | -27.35624400 | -25.45465500 | 10.58857900 L |
| H-H_  | -28.21928900 | -26.07359400 | 10.37644300 L |
| C-C_R | -26.13064600 | -26.04210200 | 10.88156600 L |
| H-H_  | -26.03377200 | -27.12121600 | 10.90766900 L |
| C-C_R | -25.14859000 | -23.85210300 | 11.11175100 L |
| C-C_R | -26.37905700 | -23.25950600 | 10.80903000 L |
| H-H_  | -24.29183800 | -23.22390800 | 11.32474200 L |
| N-N_R | -26.50217400 | -21.85711200 | 10.77058900 L |
| C-C_R | -27.48191900 | -24.07475700 | 10.54444600 L |

|       |              |              |               |
|-------|--------------|--------------|---------------|
| C-C_R | -25.47550500 | -21.07524300 | 10.21481600 L |
| C-C_R | -27.65890100 | -21.23831100 | 11.27887300 L |
| H-H_  | -28.43483500 | -23.61898600 | 10.29780500 L |
| C-C_R | -25.12023800 | -19.85521800 | 10.80192300 L |
| C-C_R | -24.78763500 | -21.50328500 | 9.07428900 L  |
| C-C_R | -28.25100900 | -21.70151900 | 12.45845100 L |
| C-C_R | -28.23324100 | -20.15400500 | 10.60708100 L |
| H-H_  | -25.61594700 | -19.53772300 | 11.70978100 L |
| C-C_R | -24.12692600 | -19.07405000 | 10.24335500 L |
| H-H_  | -25.05057500 | -22.44806800 | 8.61386200 L  |
| C-C_R | -23.78371100 | -20.72433800 | 8.53132500 L  |
| C-C_R | -29.39660200 | -21.09299100 | 12.94700000 L |
| H-H_  | -27.80356200 | -22.53470000 | 12.98625200 L |
| H-H_  | -27.78179600 | -19.79919700 | 9.68909200 L  |
| C-C_R | -29.37244600 | -19.54731400 | 11.11108400 L |
| C-C_R | -23.45155100 | -19.48194100 | 9.08625200 L  |
| H-H_  | -23.84999500 | -18.14599800 | 10.72707200 L |
| H-H_  | -23.23799000 | -21.06341400 | 7.66027900 L  |
| H-H_  | -29.84279100 | -21.46049300 | 13.86447900 L |
| C-C_R | -29.96368600 | -20.01224900 | 12.28181500 L |
| H-H_  | -29.80649000 | -18.71054200 | 10.57519200 L |
| C-C_R | -22.35630100 | -18.69669500 | 8.48861800 L  |
| H-H_  | -30.85875800 | -19.54039700 | 12.66777300 L |
| N-N_R | -21.36818800 | -19.41950700 | 7.98014900 L  |
| C-C_R | -22.28677700 | -17.27371400 | 8.48008300 L  |
| C-C_R | -20.25972100 | -18.80365500 | 7.55603200 L  |
| N-N_R | -21.15776700 | -16.65957200 | 8.15326500 L  |
| C-C_R | -23.41926100 | -16.37427300 | 8.76560700 L  |
| C-C_R | -20.11951700 | -17.38493200 | 7.72684900 L  |
| C-C_R | -19.21478300 | -19.55134100 | 6.96417100 L  |
| C-C_R | -24.73557700 | -16.67956100 | 8.39736700 L  |
| C-C_R | -23.17109000 | -15.12822500 | 9.35419900 L  |
| C-C_R | -18.89156800 | -16.75401200 | 7.41787500 L  |
| C-C_R | -18.00791900 | -18.90861700 | 6.59905400 L  |
| C-C_R | -19.37458100 | -20.94103000 | 6.73941800 L  |
| C-C_R | -25.76767100 | -15.79499500 | 8.63878200 L  |
| H-H_  | -24.94648900 | -17.61101300 | 7.88653700 L  |
| H-H_  | -22.15035400 | -14.86857300 | 9.60605400 L  |
| C-C_R | -24.20117200 | -14.24446800 | 9.61688100 L  |
| C-C_R | -17.82418700 | -17.51341600 | 6.88419600 L  |
| C-C_R | -18.73115700 | -15.36498000 | 7.64372100 L  |
| N-N_R | -19.50579500 | -22.07925600 | 6.55473300 L  |
| H-H_  | -26.77606300 | -16.03652500 | 8.32593200 L  |
| C-C_R | -25.51723200 | -14.57059800 | 9.26799500 L  |

|       |              |              |               |
|-------|--------------|--------------|---------------|
| H-H_  | -23.99424300 | -13.29782600 | 10.09880700 L |
| N-N_R | -18.59994400 | -14.22675400 | 7.82840700 L  |
| N-N_R | -26.57192400 | -13.68174800 | 9.53653800 L  |
| C-C_R | -27.81277200 | -14.17697400 | 9.97645800 L  |
| C-C_R | -26.38435200 | -12.29393000 | 9.37485600 L  |
| C-C_R | -27.86676800 | -15.22987400 | 10.89632200 L |
| C-C_R | -29.00583100 | -13.62223800 | 9.50371300 L  |
| C-C_R | -26.93198900 | -11.39539100 | 10.29428400 L |
| C-C_R | -25.64619500 | -11.80350700 | 8.29369900 L  |
| H-H_  | -26.94338800 | -15.65582600 | 11.27079300 L |
| C-C_R | -29.09022900 | -15.71692900 | 11.32776100 L |
| H-H_  | -28.96844800 | -12.81371700 | 8.78479200 L  |
| C-C_R | -30.22420400 | -14.10949300 | 9.95140200 L  |
| H-H_  | -27.49379300 | -11.77300100 | 11.14045500 L |
| C-C_R | -26.74851400 | -10.03134100 | 10.12700700 L |
| H-H_  | -25.22631500 | -12.49737800 | 7.57532400 L  |
| C-C_R | -25.45616900 | -10.43806500 | 8.14555700 L  |
| H-H_  | -29.11295600 | -16.52921700 | 12.04444600 L |
| C-C_R | -30.27616400 | -15.15928400 | 10.86192900 L |
| H-H_  | -31.14211600 | -13.67153800 | 9.57376800 L  |
| C-C_R | -26.00678900 | -9.54443300  | 9.05638100 L  |
| H-H_  | -27.17428500 | -9.34569400  | 10.85014000 L |
| H-H_  | -24.88063300 | -10.07208900 | 7.30300400 L  |
| H-H_  | -31.23220000 | -15.53653000 | 11.20693400 L |
| H-H_  | -25.86050500 | -8.47787400  | 8.93325200 L  |
| C-C_R | -14.65932100 | -24.78942900 | 1.02010000 L  |
| H-H_  | -15.68495100 | -24.91368300 | 0.69317500 L  |
| C-C_R | -12.46170500 | -25.68173300 | 1.38903100 L  |
| H-H_  | -11.76580400 | -26.51351300 | 1.36669800 L  |
| C-C_R | -13.77617000 | -25.86091900 | 0.97205000 L  |
| H-H_  | -14.10875000 | -26.82833200 | 0.61388300 L  |
| C-C_R | -14.23843100 | -23.54915600 | 1.47189700 L  |
| C-C_R | -12.91782200 | -23.36877700 | 1.89897000 L  |
| H-H_  | -14.92468800 | -22.71148100 | 1.49786800 L  |
| N-N_R | -12.48830800 | -22.11236700 | 2.36937400 L  |
| C-C_R | -12.03293800 | -24.44968300 | 1.85801500 L  |
| C-C_R | -13.33365000 | -21.33503900 | 3.17848700 L  |
| C-C_R | -11.20505400 | -21.63977700 | 2.03761800 L  |
| H-H_  | -11.01419900 | -24.31758200 | 2.19900900 L  |
| C-C_R | -13.38959900 | -19.94661700 | 3.01349100 L  |
| C-C_R | -14.14107500 | -21.93379300 | 4.15180900 L  |
| C-C_R | -10.68927700 | -21.82963000 | 0.75232400 L  |
| C-C_R | -10.42952900 | -20.97443100 | 2.99205600 L  |
| H-H_  | -12.80278700 | -19.47950600 | 2.23278100 L  |

|       |              |              |               |
|-------|--------------|--------------|---------------|
| C-C_R | -14.20320700 | -19.17934600 | 3.82349700 L  |
| H-H_  | -14.11149600 | -23.00818400 | 4.28433200 L  |
| C-C_R | -14.96632800 | -21.15986500 | 4.94671300 L  |
| C-C_R | -9.41987100  | -21.37055400 | 0.43575100 L  |
| H-H_  | -11.29077400 | -22.33597300 | 0.00659000 L  |
| H-H_  | -10.82229000 | -20.83280700 | 3.99091900 L  |
| C-C_R | -9.16619000  | -20.50899800 | 2.66257000 L  |
| C-C_R | -14.99326800 | -19.76597600 | 4.81910200 L  |
| H-H_  | -14.24999600 | -18.10984900 | 3.66288800 L  |
| H-H_  | -15.60411300 | -21.62489900 | 5.68765600 L  |
| H-H_  | -9.03513300  | -21.52306000 | -0.56516500 L |
| C-C_R | -8.65205200  | -20.70563200 | 1.38601300 L  |
| H-H_  | -8.57602500  | -19.99937300 | 3.41570700 L  |
| C-C_R | -15.90859700 | -18.98402300 | 5.67018400 L  |
| H-H_  | -7.66124700  | -20.34776400 | 1.13252600 L  |
| N-N_R | -17.04929600 | -19.59127000 | 5.96376400 L  |
| C-C_R | -15.66038900 | -17.65703800 | 6.12530600 L  |
| N-N_R | -16.63545500 | -16.94103600 | 6.66905200 L  |
| C-C_R | -14.34724000 | -16.98853700 | 6.09417700 L  |
| C-C_R | -13.14563500 | -17.67766300 | 6.30191200 L  |
| C-C_R | -14.29021500 | -15.59819200 | 5.93389400 L  |
| C-C_R | -11.93444900 | -17.01313300 | 6.31084200 L  |
| H-H_  | -13.16340600 | -18.74410300 | 6.48769600 L  |
| H-H_  | -15.21825100 | -15.05449900 | 5.81224100 L  |
| C-C_R | -13.08146400 | -14.92907400 | 5.92315100 L  |
| H-H_  | -11.01662900 | -17.55848100 | 6.49579600 L  |
| C-C_R | -11.88368300 | -15.63126900 | 6.10503000 L  |
| H-H_  | -13.05513800 | -13.85804900 | 5.76828400 L  |
| N-N_R | -10.65047800 | -14.96066500 | 6.08972700 L  |
| C-C_R | -9.53456600  | -15.55577300 | 5.47119400 L  |
| C-C_R | -10.53072600 | -13.68775000 | 6.68218300 L  |
| C-C_R | -9.68252600  | -16.25316000 | 4.26873100 L  |
| C-C_R | -8.26584000  | -15.45657700 | 6.05055000 L  |
| C-C_R | -9.76311600  | -12.69081000 | 6.07043000 L  |
| C-C_R | -11.17887300 | -13.40659700 | 7.88783800 L  |
| H-H_  | -10.66254500 | -16.32453200 | 3.81353700 L  |
| C-C_R | -8.58192300  | -16.83975800 | 3.66297400 L  |
| H-H_  | -8.14853500  | -14.92633700 | 6.98750200 L  |
| C-C_R | -7.16987100  | -16.03705200 | 5.43093500 L  |
| H-H_  | -9.26928800  | -12.90168700 | 5.12891100 L  |
| C-C_R | -9.64565100  | -11.44352700 | 6.66156200 L  |
| H-H_  | -11.76725400 | -14.17927400 | 8.36938800 L  |
| C-C_R | -11.06572500 | -12.15060500 | 8.46283000 L  |
| H-H_  | -8.71516000  | -17.37257400 | 2.72790200 L  |



|       |              |              |               |
|-------|--------------|--------------|---------------|
| C-C_R | -7.32021300  | -16.73409100 | 4.23642300 L  |
| H-H_  | -6.19258000  | -15.95400100 | 5.89285200 L  |
| C-C_R | -10.29712800 | -11.16382300 | 7.85722700 L  |
| H-H_  | -9.05135500  | -10.67847700 | 6.17394300 L  |
| H-H_  | -11.57562800 | -11.94757500 | 9.39673100 L  |
| H-H_  | -6.46047100  | -17.18612200 | 3.75586600 L  |
| H-H_  | -10.20988300 | -10.18436300 | 8.31241800 L  |
| C-C_R | -7.16989700  | -5.67511600  | -5.41464200 L |
| H-H_  | -6.20987400  | -6.11997400  | -5.18006100 L |
| C-C_R | -9.49662300  | -5.89659100  | -5.96480100 L |
| H-H_  | -10.35980000 | -6.51693000  | -6.17679000 L |
| C-C_R | -8.27179500  | -6.48467500  | -5.67176500 L |
| H-H_  | -8.17417700  | -7.56304600  | -5.64471700 L |
| C-C_R | -7.28896900  | -4.29404000  | -5.44162900 L |
| C-C_R | -8.52020600  | -3.70207800  | -5.74430200 L |
| H-H_  | -6.43298700  | -3.66648100  | -5.22859000 L |
| N-N_R | -8.64255300  | -2.29904900  | -5.78279100 L |
| C-C_R | -9.62306800  | -4.51733000  | -6.00888600 L |
| C-C_R | -7.61668000  | -1.51770800  | -6.33752100 L |
| C-C_R | -9.79928000  | -1.68024800  | -5.27450700 L |
| H-H_  | -10.57521400 | -4.06092300  | -6.25557500 L |
| C-C_R | -7.26061700  | -0.29715400  | -5.75145700 L |
| C-C_R | -6.92880900  | -1.94575100  | -7.47804800 L |
| C-C_R | -10.39152000 | -2.14485600  | -4.09478100 L |
| C-C_R | -10.37377800 | -0.59723500  | -5.94515700 L |
| H-H_  | -7.75635200  | 0.02044800   | -4.84260500 L |
| C-C_R | -6.26807500  | 0.48337700   | -6.30997600 L |
| H-H_  | -7.19095400  | -2.89000400  | -7.93951800 L |
| C-C_R | -5.92409000  | -1.16627500  | -8.02205500 L |
| C-C_R | -11.53777700 | -1.53545700  | -3.60533800 L |
| H-H_  | -9.94394100  | -2.97663700  | -3.56712800 L |
| H-H_  | -9.92294500  | -0.24176900  | -6.86424000 L |
| C-C_R | -11.51282500 | 0.01074900   | -5.44229600 L |
| C-C_R | -5.59270000  | 0.07548700   | -7.46707900 L |
| H-H_  | -5.99114400  | 1.41143000   | -5.82625900 L |
| H-H_  | -5.37916500  | -1.50587900  | -8.89205900 L |
| H-H_  | -11.98319500 | -1.90232200  | -2.68790700 L |
| C-C_R | -12.10406500 | -0.45418600  | -4.27156500 L |
| H-H_  | -11.94689400 | 0.84762800   | -5.97719400 L |
| C-C_R | -4.49670500  | 0.86147500   | -8.06376800 L |
| H-H_  | -12.99916200 | 0.01777400   | -3.88461300 L |
| N-N_R | -3.50933700  | 0.13792100   | -8.57318300 L |
| C-C_R | -4.42792600  | 2.28371300   | -8.07324800 L |
| C-C_R | -2.40087000  | 0.75377200   | -8.99730000 L |

|       |              |             |                |
|-------|--------------|-------------|----------------|
| N-N_R | -3.29891600  | 2.89785600  | -8.40006600 L  |
| C-C_R | -5.56043600  | 3.18326100  | -7.78673100 L  |
| C-C_R | -2.26066600  | 2.17249600  | -8.82648200 L  |
| C-C_R | -1.35518700  | 0.00682900  | -9.58821500 L  |
| C-C_R | -6.87672600  | 2.87786600  | -8.15596500 L  |
| C-C_R | -5.31223900  | 4.42920200  | -7.19913300 L  |
| C-C_R | -1.03274200  | 2.80352300  | -9.13446200 L  |
| C-C_R | -0.14906800  | 0.64881000  | -9.95427700 L  |
| C-C_R | -1.51573000  | -1.38360300 | -9.81391300 L  |
| C-C_R | -7.90884500  | 3.76254000  | -7.91355600 L  |
| H-H_  | -7.08763800  | 1.94641400  | -8.66679400 L  |
| H-H_  | -4.29150300  | 4.68885500  | -6.94727700 L  |
| C-C_R | -6.34155000  | 5.31359500  | -6.93649900 L  |
| C-C_R | 0.03543400   | 2.04464700  | -9.66918400 L  |
| C-C_R | -0.87153600  | 4.19308300  | -8.90965900 L  |
| N-N_R | -1.64694400  | -2.52182900 | -9.99859900 L  |
| H-H_  | -8.91646700  | 3.52164500  | -8.22645400 L  |
| C-C_R | -7.65763600  | 4.98757300  | -7.28439100 L  |
| H-H_  | -6.13462200  | 6.26023800  | -6.45457300 L  |
| N-N_R | -0.74032300  | 5.33130900  | -8.72497300 L  |
| N-N_R | -8.71230300  | 5.87631600  | -7.01684200 L  |
| C-C_R | -9.95392100  | 5.38045400  | -6.57687300 L  |
| C-C_R | -8.52552700  | 7.26360400  | -7.17748100 L  |
| C-C_R | -10.00791700 | 4.32755300  | -5.65700900 L  |
| C-C_R | -11.14700600 | 5.93529700  | -7.04862500 L  |
| C-C_R | -9.07239400  | 8.16277900  | -6.25810200 L  |
| C-C_R | -7.78659900  | 7.75466300  | -8.25868700 L  |
| H-H_  | -9.08376700  | 3.90223700  | -5.28258700 L  |
| C-C_R | -11.23060800 | 3.84113500  | -5.22561900 L  |
| H-H_  | -11.10959700 | 6.74371000  | -7.76853900 L  |
| C-C_R | -12.36535300 | 5.44793400  | -6.60193000 L  |
| H-H_  | -9.63494200  | 7.78442600  | -5.41287700 L  |
| C-C_R | -8.88891900  | 9.52683000  | -6.42537900 L  |
| H-H_  | -7.36672000  | 7.06079200  | -8.97706200 L  |
| C-C_R | -7.59731800  | 9.11936300  | -8.40777500 L  |
| H-H_  | -11.25410500 | 3.02821100  | -4.50888500 L  |
| C-C_R | -12.41731300 | 4.39814300  | -5.69140200 L  |
| H-H_  | -13.28326500 | 5.88589000  | -6.97956400 L  |
| C-C_R | -8.14793800  | 10.01299400 | -7.49695000 L  |
| H-H_  | -9.31543400  | 10.21173300 | -5.70319100 L  |
| H-H_  | -7.02178200  | 9.48533900  | -9.25032700 L  |
| H-H_  | -13.37257900 | 4.02153400  | -5.34644600 L  |
| H-H_  | -8.00088400  | 11.08019000 | -7.62012800 L  |
| C-C_R | 3.20030000   | -5.23136600 | -15.53328000 L |

|       |             |             |                |
|-------|-------------|-------------|----------------|
| H-H_  | 2.17387500  | -5.35614900 | -15.85916200 L |
| C-C_R | 5.39789100  | -6.12356300 | -15.16335500 L |
| H-H_  | 6.09381700  | -6.95544900 | -15.18668200 L |
| C-C_R | 4.08329300  | -6.30414900 | -15.58018900 L |
| H-H_  | 3.75087100  | -7.27026900 | -15.93949700 L |
| C-C_R | 3.62116400  | -3.99098600 | -15.08048900 L |
| C-C_R | 4.94100400  | -3.81124300 | -14.65336800 L |
| H-H_  | 2.93493300  | -3.15341700 | -15.05551200 L |
| N-N_R | 5.37131300  | -2.55430300 | -14.18400600 L |
| C-C_R | 5.82591300  | -4.89225600 | -14.69531700 L |
| C-C_R | 4.52520100  | -1.77761100 | -13.37484400 L |
| C-C_R | 6.65379700  | -2.08234900 | -14.51571300 L |
| H-H_  | 6.84539600  | -4.75941100 | -14.35337800 L |
| C-C_R | 4.46922600  | -0.38908300 | -13.53884600 L |
| C-C_R | 3.71775100  | -2.37625900 | -12.40052800 L |
| C-C_R | 7.16957400  | -2.27220200 | -15.80100700 L |
| C-C_R | 7.42932200  | -1.41700400 | -13.56127500 L |
| H-H_  | 5.05680800  | 0.07866500  | -14.31960500 L |
| C-C_R | 3.65641400  | 0.37871800  | -12.72988300 L |
| H-H_  | 3.74735500  | -3.45075700 | -12.26900000 L |
| C-C_R | 2.89252300  | -1.60243800 | -11.60661800 L |
| C-C_R | 8.43898000  | -1.81312700 | -16.11758000 L |
| H-H_  | 6.56805200  | -2.77843800 | -16.54574700 L |
| H-H_  | 7.03656100  | -1.27538000 | -12.56241200 L |
| C-C_R | 8.69266100  | -0.95157000 | -13.89076100 L |
| C-C_R | 2.86555800  | -0.20844100 | -11.73323600 L |
| H-H_  | 3.60962600  | 1.44821500  | -12.89049200 L |
| H-H_  | 2.25473800  | -2.06747100 | -10.86567500 L |
| H-H_  | 8.82448800  | -1.96499700 | -17.11854500 L |
| C-C_R | 9.20820700  | -1.14833300 | -15.16726900 L |
| H-H_  | 9.28282600  | -0.44194500 | -13.13762400 L |
| C-C_R | 1.95102400  | 0.57404100  | -10.88319600 L |
| H-H_  | 10.19760400 | -0.79033700 | -15.42080500 L |
| N-N_R | 0.80952900  | -0.03373600 | -10.58857400 L |
| C-C_R | 2.19920700  | 1.90113300  | -10.42708000 L |
| N-N_R | 1.22416600  | 2.61702800  | -9.88432800 L  |
| C-C_R | 3.51238200  | 2.56952600  | -10.45920300 L |
| C-C_R | 4.71321600  | 1.87976400  | -10.25141900 L |
| C-C_R | 3.56863600  | 3.95923600  | -10.61943800 L |
| C-C_R | 5.92504000  | 2.54353000  | -10.24239000 L |
| H-H_  | 4.69541900  | 0.81343100  | -10.06464200 L |
| H-H_  | 2.64137100  | 4.50356400  | -10.74113900 L |
| C-C_R | 4.77815700  | 4.62899000  | -10.63022900 L |
| H-H_  | 6.84219700  | 1.99905300  | -10.05654200 L |

|       |             |             |                |
|-------|-------------|-------------|----------------|
| C-C_R | 5.97593800  | 3.92679400  | -10.44835000 L |
| H-H_  | 4.80445800  | 5.70012100  | -10.78410200 L |
| N-N_R | 7.20911700  | 4.59750500  | -10.46265900 L |
| C-C_R | 8.32425900  | 4.00176200  | -11.08114300 L |
| C-C_R | 7.32889500  | 5.87031300  | -9.87119700 L  |
| C-C_R | 8.17707000  | 3.30501100  | -12.28365500 L |
| C-C_R | 9.59375500  | 4.10159400  | -10.50183600 L |
| C-C_R | 8.09573500  | 6.86661700  | -10.48290100 L |
| C-C_R | 6.67995300  | 6.15093800  | -8.66449900 L  |
| H-H_  | 7.19630600  | 3.23289500  | -12.73979500 L |
| C-C_R | 9.27692800  | 2.71767000  | -12.89035700 L |
| H-H_  | 9.71108600  | 4.63172600  | -9.56587800 L  |
| C-C_R | 10.68898000 | 3.52037500  | -11.12239600 L |
| H-H_  | 8.59033300  | 6.65637600  | -11.42446900 L |
| C-C_R | 8.21320000  | 8.11390000  | -9.89176900 L  |
| H-H_  | 6.09159700  | 5.37815300  | -8.18394300 L  |
| C-C_R | 6.79312600  | 7.40682300  | -8.09050200 L  |
| H-H_  | 9.14446100  | 2.18548900  | -13.82547800 L |
| C-C_R | 10.53940800 | 2.82397200  | -12.31695700 L |
| H-H_  | 11.66704200 | 3.60406200  | -10.66052800 L |
| C-C_R | 7.56169800  | 8.39371100  | -8.69511000 L  |
| H-H_  | 8.80749600  | 8.87895100  | -10.37938900 L |
| H-H_  | 6.28319800  | 7.60996000  | -7.15560600 L  |
| H-H_  | 11.39835500 | 2.37141200  | -12.79647200 L |
| H-H_  | 7.64973800  | 9.37370000  | -8.24096200 L  |
| C-C_R | -6.19232200 | -6.47026400 | -0.33471800 L  |
| H-H_  | -5.23166200 | -6.91588700 | -0.10003800 L  |
| C-C_R | -8.51841100 | -6.69250400 | -0.88477800 L  |
| H-H_  | -9.38222600 | -7.31207900 | -1.09686600 L  |
| C-C_R | -7.29422100 | -7.27982300 | -0.59184100 L  |
| H-H_  | -7.19596500 | -8.35895900 | -0.56469400 L  |
| C-C_R | -6.31075700 | -5.08995300 | -0.36160600 L  |
| C-C_R | -7.54199400 | -4.49799100 | -0.66427900 L  |
| H-H_  | -5.45541200 | -4.46162900 | -0.14866500 L  |
| N-N_R | -7.66434100 | -3.09496200 | -0.70276800 L  |
| C-C_R | -8.64549300 | -5.31247800 | -0.92896100 L  |
| C-C_R | -6.63910500 | -2.31285700 | -1.25759700 L  |
| C-C_R | -8.82170600 | -2.47539600 | -0.19458300 L  |
| H-H_  | -9.59700200 | -4.85683500 | -1.17555200 L  |
| C-C_R | -6.28240500 | -1.09306700 | -0.67143400 L  |
| C-C_R | -5.95057100 | -2.74177000 | -2.39901900 L  |
| C-C_R | -9.41394600 | -2.94000400 | 0.98514300 L   |
| C-C_R | -9.39620400 | -1.39238300 | -0.86523300 L  |
| H-H_  | -6.77877700 | -0.77470100 | 0.23732000 L   |

|       |              |             |               |
|-------|--------------|-------------|---------------|
| C-C_R | -5.29050000  | -0.31177100 | -1.23005200 L |
| H-H_  | -6.21338000  | -3.68515300 | -2.85959400 L |
| C-C_R | -4.94651600  | -1.96142300 | -2.94213100 L |
| C-C_R | -10.56020200 | -2.33060600 | 1.47458700 L  |
| H-H_  | -8.96636600  | -3.77178500 | 1.51279700 L  |
| H-H_  | -8.94537100  | -1.03691800 | -1.78431500 L |
| C-C_R | -10.53525100 | -0.78439900 | -0.36237200 L |
| C-C_R | -4.61512500  | -0.71966200 | -2.38715500 L |
| H-H_  | -5.01357000  | 0.61628100  | -0.74633500 L |
| H-H_  | -4.40156400  | -2.30113500 | -3.81312800 L |
| H-H_  | -11.00498300 | -2.69823500 | 2.39211600 L  |
| C-C_R | -11.12649000 | -1.24933400 | 0.80835900 L  |
| H-H_  | -10.96931900 | 0.05248000  | -0.89727000 L |
| C-C_R | -3.51910500  | 0.06622000  | -2.98483800 L |
| H-H_  | -12.02158800 | -0.77737500 | 1.19531200 L  |
| N-N_R | -2.53176200  | -0.65722800 | -3.49325800 L |
| C-C_R | -3.44971400  | 1.48780000  | -2.99322500 L |
| C-C_R | -1.42329500  | -0.04137600 | -3.91737500 L |
| N-N_R | -2.32134200  | 2.10270700  | -3.32014200 L |
| C-C_R | -4.58222300  | 2.38734900  | -2.70670800 L |
| C-C_R | -1.28245400  | 1.37658300  | -3.74645900 L |
| C-C_R | -0.37697500  | -0.78908400 | -4.50819200 L |
| C-C_R | -5.89851400  | 2.08195300  | -3.07594200 L |
| C-C_R | -4.33466400  | 3.63405400  | -2.11920800 L |
| C-C_R | -0.05453000  | 2.00761000  | -4.05443900 L |
| C-C_R | 0.82850700   | -0.14633800 | -4.87435300 L |
| C-C_R | -0.53815500  | -2.17875100 | -4.73398900 L |
| C-C_R | -6.93060700  | 2.96652000  | -2.83452700 L |
| H-H_  | -6.10942600  | 1.15050200  | -3.58677100 L |
| H-H_  | -3.31392800  | 3.89370600  | -1.86735200 L |
| C-C_R | -5.36397600  | 4.51844700  | -1.85657500 L |
| C-C_R | 1.01364600   | 1.24873500  | -4.58916100 L |
| C-C_R | 0.10603800   | 3.39793500  | -3.82973500 L |
| N-N_R | -0.66936900  | -3.31697700 | -4.91867400 L |
| H-H_  | -7.93889300  | 2.72649700  | -3.14652900 L |
| C-C_R | -6.68006100  | 4.19242400  | -2.20446700 L |
| H-H_  | -5.15704700  | 5.46508900  | -1.37464800 L |
| N-N_R | 0.23788900   | 4.53539600  | -3.64495000 L |
| N-N_R | -7.73472800  | 5.08116700  | -1.93691700 L |
| C-C_R | -8.97570900  | 4.58454100  | -1.49685000 L |
| C-C_R | -7.54731500  | 6.46769200  | -2.09745800 L |
| C-C_R | -9.03034200  | 3.53240500  | -0.57708400 L |
| C-C_R | -10.16940500 | 5.14004100  | -1.96969400 L |
| C-C_R | -8.09418100  | 7.36686700  | -1.17807900 L |

|       |              |             |                |
|-------|--------------|-------------|----------------|
| C-C_R | -6.80838700  | 6.95875100  | -3.17866400 L  |
| H-H_  | -8.10619200  | 3.10708900  | -0.20266300 L  |
| C-C_R | -10.25303300 | 3.04598600  | -0.14569400 L  |
| H-H_  | -10.13202200 | 5.94856200  | -2.68861500 L  |
| C-C_R | -11.38777800 | 4.65278600  | -1.52200500 L  |
| H-H_  | -8.65673000  | 6.98851400  | -0.33285400 L  |
| C-C_R | -7.91134400  | 8.73168100  | -1.34545500 L  |
| H-H_  | -6.38911900  | 6.26553700  | -3.89813100 L  |
| C-C_R | -6.61974300  | 8.32421400  | -3.32785000 L  |
| H-H_  | -10.27653000 | 2.23306200  | 0.57103900 L   |
| C-C_R | -11.43973800 | 3.60299500  | -0.61147800 L  |
| H-H_  | -12.30569000 | 5.09074100  | -1.89963900 L  |
| C-C_R | -7.17036300  | 9.21784600  | -2.41702600 L  |
| H-H_  | -8.33786000  | 9.41658500  | -0.62326700 L  |
| H-H_  | -6.04420700  | 8.69019000  | -4.17040300 L  |
| H-H_  | -12.39500400 | 3.22638500  | -0.26652200 L  |
| H-H_  | -7.02267200  | 10.28427700 | -2.54010500 L  |
| C-C_R | 4.17787400   | -6.02651400 | -10.45335600 L |
| H-H_  | 3.15145000   | -6.15129700 | -10.77923800 L |
| C-C_R | 6.37612800   | -6.91958200 | -10.08432600 L |
| H-H_  | 7.07139200   | -7.75059800 | -10.10675700 L |
| C-C_R | 5.06089300   | -7.09940400 | -10.50125900 L |
| H-H_  | 4.72844600   | -8.06541700 | -10.85957300 L |
| C-C_R | 4.59873900   | -4.78613400 | -10.00056400 L |
| C-C_R | 5.91857800   | -4.60639100 | -9.57344300 L  |
| H-H_  | 3.91250800   | -3.94856600 | -9.97558700 L  |
| N-N_R | 6.34888800   | -3.34945200 | -9.10408100 L  |
| C-C_R | 6.80348700   | -5.68740400 | -9.61539200 L  |
| C-C_R | 5.50277600   | -2.57276000 | -8.29492000 L  |
| C-C_R | 7.63137200   | -2.87749800 | -9.43578900 L  |
| H-H_  | 7.82360800   | -5.55532400 | -9.27335400 L  |
| C-C_R | 5.44743800   | -1.18499500 | -8.45882300 L  |
| C-C_R | 4.69596300   | -3.17217100 | -7.32050500 L  |
| C-C_R | 8.14778700   | -3.06811500 | -10.72098400 L |
| C-C_R | 8.40689700   | -2.21215200 | -8.48135100 L  |
| H-H_  | 6.03440900   | -0.71659100 | -9.24067500 L  |
| C-C_R | 4.63398800   | -0.41643100 | -7.64995800 L  |
| H-H_  | 4.72493000   | -4.24590600 | -7.18907500 L  |
| C-C_R | 3.87073500   | -2.39835000 | -6.52659500 L  |
| C-C_R | 9.41655500   | -2.60827500 | -11.03765500 L |
| H-H_  | 7.54562600   | -3.57358700 | -11.46582300 L |
| H-H_  | 8.01413600   | -2.07052800 | -7.48248800 L  |
| C-C_R | 9.67023600   | -1.74671900 | -8.81083700 L  |
| C-C_R | 3.84377000   | -1.00435400 | -6.65321300 L  |

|       |             |             |                |
|-------|-------------|-------------|----------------|
| H-H_  | 4.58720000  | 0.65306600  | -7.81056800 L  |
| H-H_  | 3.23231300  | -2.86262000 | -5.78575100 L  |
| H-H_  | 9.80206200  | -2.76014500 | -12.03862000 L |
| C-C_R | 10.18578100 | -1.94348100 | -10.08734400 L |
| H-H_  | 10.26103800 | -1.23785800 | -8.05760100 L  |
| C-C_R | 2.92859900  | -0.22110800 | -5.80327200 L  |
| H-H_  | 11.17581600 | -1.58624900 | -10.34078200 L |
| N-N_R | 1.78710400  | -0.82888400 | -5.50864900 L  |
| C-C_R | 3.17678200  | 1.10598400  | -5.34715500 L  |
| N-N_R | 2.20237800  | 1.82111500  | -4.80430500 L  |
| C-C_R | 4.49059400  | 1.77361300  | -5.37918000 L  |
| C-C_R | 5.69142800  | 1.08385200  | -5.17139600 L  |
| C-C_R | 4.54684800  | 3.16332300  | -5.53941500 L  |
| C-C_R | 6.90261400  | 1.74838100  | -5.16246600 L  |
| H-H_  | 5.67299400  | 0.01828300  | -4.98471700 L  |
| H-H_  | 3.61894500  | 3.70841600  | -5.66121500 L  |
| C-C_R | 5.75573200  | 3.83384100  | -5.55030400 L  |
| H-H_  | 7.81977100  | 1.20390500  | -4.97661700 L  |
| C-C_R | 6.95351300  | 3.13164600  | -5.36842500 L  |
| H-H_  | 5.78203300  | 4.90497300  | -5.70417800 L  |
| N-N_R | 8.18671700  | 3.80225000  | -5.38372900 L  |
| C-C_R | 9.30183400  | 3.20661300  | -6.00121900 L  |
| C-C_R | 8.30647000  | 5.07516500  | -4.79127300 L  |
| C-C_R | 9.15530800  | 2.50899100  | -7.20462500 L  |
| C-C_R | 10.57196800 | 3.30568100  | -5.42181300 L  |
| C-C_R | 9.07331000  | 6.07146900  | -5.40297700 L  |
| C-C_R | 7.65752700  | 5.35578900  | -3.58457500 L  |
| H-H_  | 8.17388100  | 2.43774700  | -7.65987000 L  |
| C-C_R | 10.25450200 | 1.92252100  | -7.81043300 L  |
| H-H_  | 10.68866100 | 3.83657800  | -4.48595300 L  |
| C-C_R | 11.66655500 | 2.72522700  | -6.04247200 L  |
| H-H_  | 9.56790800  | 5.86122800  | -6.34454400 L  |
| C-C_R | 9.19077400  | 7.31875200  | -4.81184500 L  |
| H-H_  | 7.06917100  | 4.58300500  | -3.10401900 L  |
| C-C_R | 7.77070100  | 6.61167400  | -3.01057700 L  |
| H-H_  | 10.12203600 | 1.39034100  | -8.74555400 L  |
| C-C_R | 11.51698300 | 2.02882400  | -7.23703300 L  |
| H-H_  | 12.64525400 | 2.80815000  | -5.58050500 L  |
| C-C_R | 8.53927200  | 7.59856300  | -3.61518600 L  |
| H-H_  | 9.78507100  | 8.08380200  | -5.29946400 L  |
| H-H_  | 7.26077200  | 6.81481100  | -2.07568200 L  |
| H-H_  | 12.37592900 | 1.57626400  | -7.71654700 L  |
| H-H_  | 8.62731300  | 8.57855200  | -3.16103700 L  |
| C-C_R | -5.37492700 | -7.39267600 | 4.85463300 H   |

|       |              |             |               |
|-------|--------------|-------------|---------------|
| H-H_  | -4.41497500  | -7.81972000 | 5.12092300 H  |
| C-C_R | -7.68022000  | -7.65191300 | 4.25646700 H  |
| H-H_  | -8.52734900  | -8.28087200 | 4.01656900 H  |
| C-C_R | -6.45727900  | -8.22136800 | 4.58807400 H  |
| H-H_  | -6.34836400  | -9.29843400 | 4.62964800 H  |
| C-C_R | -5.51661500  | -6.01390200 | 4.80657300 H  |
| C-C_R | -6.75404000  | -5.44182300 | 4.50622400 H  |
| H-H_  | -4.66812800  | -5.36816900 | 4.99484300 H  |
| N-N_R | -6.91627900  | -4.03742100 | 4.51527800 H  |
| C-C_R | -7.83372300  | -6.27542600 | 4.21463400 H  |
| C-C_R | -5.95568400  | -3.21956600 | 3.90942900 H  |
| C-C_R | -8.08465200  | -3.48387200 | 5.08638900 H  |
| H-H_  | -8.79238800  | -5.83740400 | 3.96757200 H  |
| C-C_R | -5.64784000  | -1.95653300 | 4.42939200 H  |
| C-C_R | -5.27625100  | -3.65111100 | 2.76378700 H  |
| C-C_R | -8.64250000  | -4.04535800 | 6.23769300 H  |
| C-C_R | -8.71292500  | -2.38388500 | 4.49767700 H  |
| H-H_  | -6.13703700  | -1.61980500 | 5.33511100 H  |
| C-C_R | -4.72596200  | -1.14210200 | 3.79820500 H  |
| H-H_  | -5.49530700  | -4.63043600 | 2.35861000 H  |
| C-C_R | -4.34194400  | -2.84068700 | 2.15186000 H  |
| C-C_R | -9.81091900  | -3.52326000 | 6.77296800 H  |
| H-H_  | -8.15827900  | -4.89235300 | 6.70852500 H  |
| H-H_  | -8.29402800  | -1.94685700 | 3.59939300 H  |
| C-C_R | -9.86757200  | -1.85425400 | 5.05554300 H  |
| C-C_R | -4.06353100  | -1.55835500 | 2.63880700 H  |
| H-H_  | -4.50439200  | -0.17122400 | 4.22149700 H  |
| H-H_  | -3.81240700  | -3.18647900 | 1.27308900 H  |
| H-H_  | -10.23003800 | -3.97050000 | 7.66655100 H  |
| C-C_R | -10.42952500 | -2.42292500 | 6.19207000 H  |
| H-H_  | -10.33962000 | -0.99952900 | 4.58340700 H  |
| C-C_R | -3.01583400  | -0.76141800 | 1.97800100 H  |
| H-H_  | -11.33635100 | -2.01220700 | 6.62044700 H  |
| N-N_R | -2.06194400  | -1.46327900 | 1.41868400 H  |
| C-C_R | -2.95838500  | 0.70072300  | 1.94934900 H  |
| C-C_R | -0.96868700  | -0.84280800 | 0.92898100 H  |
| N-N_R | -1.86722400  | 1.29674500  | 1.53653200 H  |
| C-C_R | -4.05797200  | 1.61433500  | 2.30308700 H  |
| C-C_R | -0.83591000  | 0.56739000  | 1.06762100 H  |
| C-C_R | 0.06870900   | -1.59535500 | 0.35192800 H  |
| C-C_R | -5.41098400  | 1.29546600  | 2.15475300 H  |
| C-C_R | -3.74301900  | 2.92094800  | 2.69845100 H  |
| C-C_R | 0.36242500   | 1.20352700  | 0.70319000 H  |
| C-C_R | 1.26230300   | -0.95686700 | -0.02789700 H |



|       |              |             |               |
|-------|--------------|-------------|---------------|
| C-C_R | -0.06618300  | -3.00516700 | 0.19385600 H  |
| C-C_R | -6.40615700  | 2.23250900  | 2.35466000 H  |
| H-H_  | -5.69165700  | 0.29698900  | 1.86099700 H  |
| H-H_  | -2.70186500  | 3.19289700  | 2.81778900 H  |
| C-C_R | -4.72804200  | 3.85538800  | 2.93491700 H  |
| C-C_R | 1.42577300   | 0.44038200  | 0.19346700 H  |
| C-C_R | 0.51156300   | 2.60866100  | 0.88710000 H  |
| N-N_R | -0.16522600  | -4.15175400 | 0.07192400 H  |
| H-H_  | -7.44167000  | 1.96008000  | 2.19274200 H  |
| C-C_R | -6.08190300  | 3.53806700  | 2.74242200 H  |
| H-H_  | -4.45308500  | 4.84969000  | 3.26268700 H  |
| N-N_R | 0.63131200   | 3.75022200  | 1.03505900 H  |
| N-N_R | -7.06633200  | 4.50803900  | 2.91682900 H  |
| C-C_R | -8.37956100  | 4.19063600  | 3.33603200 H  |
| C-C_R | -6.73261500  | 5.87473600  | 2.77600900 H  |
| C-C_R | -8.60764500  | 3.28162400  | 4.37043400 H  |
| C-C_R | -9.46563400  | 4.83064500  | 2.73563200 H  |
| C-C_R | -7.06199600  | 6.77209900  | 3.78594000 H  |
| C-C_R | -6.07734900  | 6.33342200  | 1.63438700 H  |
| H-H_  | -7.76555300  | 2.79923500  | 4.85343800 H  |
| C-C_R | -9.90555200  | 3.00582900  | 4.77945000 H  |
| H-H_  | -9.28741800  | 5.53469300  | 1.93159900 H  |
| C-C_R | -10.75762900 | 4.56076900  | 3.16114500 H  |
| H-H_  | -7.57177500  | 6.40850900  | 4.66924900 H  |
| C-C_R | -6.73113600  | 8.10910800  | 3.65238900 H  |
| H-H_  | -5.84166900  | 5.62609900  | 0.85116600 H  |
| C-C_R | -5.72820300  | 7.67129900  | 1.51831300 H  |
| H-H_  | -10.07023100 | 2.29634100  | 5.58286000 H  |
| C-C_R | -10.98628700 | 3.64317700  | 4.18033900 H  |
| H-H_  | -11.59102600 | 5.05864300  | 2.67800000 H  |
| C-C_R | -6.05319400  | 8.56805300  | 2.53015200 H  |
| H-H_  | -7.02123000  | 8.79218500  | 4.43560900 H  |
| H-H_  | -5.21673900  | 8.01187600  | 0.62508900 H  |
| H-H_  | -11.99718000 | 3.41933300  | 4.50013000 H  |
| H-H_  | -5.79106400  | 9.61598300  | 2.44827200 H  |
| C-C_R | 5.34198100   | -6.90779300 | -5.52117000 H |
| H-H_  | 4.38342000   | -7.06210800 | -6.00388400 H |
| C-C_R | 7.52096900   | -7.69334500 | -4.90448400 H |
| H-H_  | 8.27881300   | -8.46640300 | -4.88834200 H |
| C-C_R | 6.30043500   | -7.91259000 | -5.53258200 H |
| H-H_  | 6.09442300   | -8.85689100 | -6.02135300 H |
| C-C_R | 5.60521600   | -5.69053700 | -4.91210400 H |
| C-C_R | 6.84529000   | -5.45742200 | -4.31932300 H |
| H-H_  | 4.85565500   | -4.90937000 | -4.89953400 H |

|       |             |             |               |
|-------|-------------|-------------|---------------|
| N-N_R | 7.16854600  | -4.18857400 | -3.79136700 H |
| C-C_R | 7.79442400  | -6.47829000 | -4.29965700 H |
| C-C_R | 6.20795500  | -3.43609900 | -3.11079500 H |
| C-C_R | 8.42943700  | -3.62844600 | -4.10547100 H |
| H-H_  | 8.75578600  | -6.29737900 | -3.83627500 H |
| C-C_R | 6.18478200  | -2.04483400 | -3.23948000 H |
| C-C_R | 5.24700200  | -4.04224000 | -2.28951100 H |
| C-C_R | 9.02204300  | -3.85631700 | -5.35013900 H |
| C-C_R | 9.10951800  | -2.85025700 | -3.16674500 H |
| H-H_  | 6.90636300  | -1.56983300 | -3.89039900 H |
| C-C_R | 5.27237200  | -1.28547000 | -2.53814600 H |
| H-H_  | 5.22987300  | -5.12098400 | -2.19650500 H |
| C-C_R | 4.33680800  | -3.27361600 | -1.58793600 H |
| C-C_R | 10.27705000 | -3.33589800 | -5.63151900 H |
| H-H_  | 8.50131700  | -4.44962600 | -6.09188500 H |
| H-H_  | 8.66095500  | -2.67095600 | -2.19698300 H |
| C-C_R | 10.35319300 | -2.31487900 | -3.46619700 H |
| C-C_R | 4.35004900  | -1.87557900 | -1.67095300 H |
| H-H_  | 5.27373800  | -0.21184300 | -2.66265000 H |
| H-H_  | 3.60566000  | -3.74992400 | -0.94593300 H |
| H-H_  | 10.72739900 | -3.53124300 | -6.59751900 H |
| C-C_R | 10.95102300 | -2.56071100 | -4.69636300 H |
| H-H_  | 10.86484500 | -1.71880200 | -2.71953800 H |
| C-C_R | 3.38507400  | -1.07811600 | -0.89888500 H |
| H-H_  | 11.93289300 | -2.15943300 | -4.91925300 H |
| N-N_R | 2.24773400  | -1.66318000 | -0.62124500 H |
| C-C_R | 3.62157900  | 0.30081900  | -0.46651700 H |
| N-N_R | 2.62874400  | 1.01862700  | -0.00881900 H |
| C-C_R | 4.93885400  | 0.96567000  | -0.44679800 H |
| C-C_R | 6.12878100  | 0.26879700  | -0.21412600 H |
| C-C_R | 5.01183900  | 2.35734900  | -0.57880800 H |
| C-C_R | 7.34303600  | 0.92265100  | -0.14736800 H |
| H-H_  | 6.10202200  | -0.80304000 | -0.07583100 H |
| H-H_  | 4.09631800  | 2.91507400  | -0.73392900 H |
| C-C_R | 6.22571200  | 3.01814000  | -0.53206200 H |
| H-H_  | 8.25051700  | 0.36389300  | 0.04711500 H  |
| C-C_R | 7.41548900  | 2.30814800  | -0.32692900 H |
| H-H_  | 6.26120500  | 4.09316500  | -0.66218400 H |
| N-N_R | 8.65796200  | 2.95490000  | -0.30505500 H |
| C-C_R | 9.77577200  | 2.35154900  | -0.92548100 H |
| C-C_R | 8.80533300  | 4.22370500  | 0.28905200 H  |
| C-C_R | 9.64765400  | 1.76000200  | -2.18235500 H |
| C-C_R | 11.02485500 | 2.36370700  | -0.30112800 H |
| C-C_R | 9.65924300  | 5.16763100  | -0.28389600 H |

|       |             |             |               |
|-------|-------------|-------------|---------------|
| C-C_R | 8.12576000  | 4.54331900  | 1.46654800 H  |
| H-H_  | 8.68320800  | 1.76961700  | -2.67490400 H |
| C-C_R | 10.74790700 | 1.17826400  | -2.79573200 H |
| H-H_  | 11.12731600 | 2.82798800  | 0.67227200 H  |
| C-C_R | 12.12384400 | 1.79685200  | -0.92932300 H |
| H-H_  | 10.18284200 | 4.92919200  | -1.20134200 H |
| C-C_R | 9.84004300  | 6.39786800  | 0.32425200 H  |
| H-H_  | 7.46948400  | 3.80922200  | 1.91798700 H  |
| C-C_R | 8.29146300  | 5.79016400  | 2.05106700 H  |
| H-H_  | 10.63180700 | 0.72318600  | -3.77278100 H |
| C-C_R | 11.99282900 | 1.19609700  | -2.17662500 H |
| H-H_  | 13.08801500 | 1.81475400  | -0.43362300 H |
| C-C_R | 9.15388700  | 6.72230800  | 1.48727200 H  |
| H-H_  | 10.52210200 | 7.10978500  | -0.12444100 H |
| H-H_  | 7.75264900  | 6.02218900  | 2.96287800 H  |
| H-H_  | 12.85316000 | 0.74971600  | -2.66229700 H |
| H-H_  | 9.28720000  | 7.69712300  | 1.93547100 H  |
| C-C_R | -4.23717300 | -8.06056100 | 9.82513100 L  |
| H-H_  | -3.27651300 | -8.50618400 | 10.05981100 L |
| C-C_R | -6.56326200 | -8.28280100 | 9.27507100 L  |
| H-H_  | -7.42707600 | -8.90237600 | 9.06298300 L  |
| C-C_R | -5.33843400 | -8.87088400 | 9.56810600 L  |
| H-H_  | -5.24079000 | -9.94936200 | 9.59416100 L  |
| C-C_R | -4.35560700 | -6.68024900 | 9.79824300 L  |
| C-C_R | -5.58684400 | -6.08828800 | 9.49557000 L  |
| H-H_  | -3.49962500 | -6.05269000 | 10.01128200 L |
| N-N_R | -5.70919200 | -4.68525800 | 9.45708100 L  |
| C-C_R | -6.68970700 | -6.90353900 | 9.23098600 L  |
| C-C_R | -4.68329200 | -3.90402500 | 8.90135600 L  |
| C-C_R | -6.86591900 | -4.06645700 | 9.96536500 L  |
| H-H_  | -7.64185300 | -6.44713200 | 8.98429700 L  |
| C-C_R | -4.32725500 | -2.68336400 | 9.48841500 L  |
| C-C_R | -3.99542200 | -4.33206700 | 7.76083000 L  |
| C-C_R | -7.45879600 | -4.53030100 | 11.14499200 L |
| C-C_R | -7.44102900 | -2.98278700 | 9.29362200 L  |
| H-H_  | -4.82296500 | -2.36586900 | 10.39627300 L |
| C-C_R | -3.33471300 | -1.90283200 | 8.92989500 L  |
| H-H_  | -4.25759300 | -5.27621400 | 7.30035300 L  |
| C-C_R | -2.99072900 | -3.55248400 | 7.21781700 L  |
| C-C_R | -8.60439000 | -3.92177300 | 11.63354000 L |
| H-H_  | -7.01058000 | -5.36284600 | 11.67274400 L |
| H-H_  | -6.98958400 | -2.62797900 | 8.37563200 L  |
| C-C_R | -8.57946400 | -2.37546000 | 9.79757500 L  |
| C-C_R | -2.65933800 | -2.31072300 | 7.77279200 L  |

|       |              |             |               |
|-------|--------------|-------------|---------------|
| H-H_  | -3.05778300  | -0.97478000 | 9.41361300 L  |
| H-H_  | -2.44577700  | -3.89219600 | 6.34681900 L  |
| H-H_  | -9.04980800  | -4.28863900 | 12.55097100 L |
| C-C_R | -9.17070300  | -2.84039500 | 10.96830700 L |
| H-H_  | -9.01350700  | -1.53868800 | 9.26168400 L  |
| C-C_R | -1.56331800  | -1.52484100 | 7.17511000 L  |
| H-H_  | -10.06577500 | -2.36854300 | 11.35426500 L |
| N-N_R | -0.57597600  | -2.24828900 | 6.66668900 L  |
| C-C_R | -1.49456400  | -0.10249600 | 7.16662400 L  |
| C-C_R | 0.53249100   | -1.63243700 | 6.24257200 L  |
| N-N_R | -0.36555500  | 0.51164600  | 6.83980600 L  |
| C-C_R | -2.62704800  | 0.79694500  | 7.45214700 L  |
| C-C_R | 0.67269500   | -0.21371400 | 6.41339000 L  |
| C-C_R | 1.57820000   | -2.37948700 | 5.65066300 L  |
| C-C_R | -3.94336400  | 0.49165700  | 7.08390700 L  |
| C-C_R | -2.37887800  | 2.04299300  | 8.04073900 L  |
| C-C_R | 1.90064500   | 0.41720600  | 6.10441600 L  |
| C-C_R | 2.78429400   | -1.73739900 | 5.28559400 L  |
| C-C_R | 1.41763100   | -3.76981200 | 5.42595900 L  |
| C-C_R | -4.97545800  | 1.37622300  | 7.32532200 L  |
| H-H_  | -4.15427600  | -0.43979500 | 6.57307800 L  |
| H-H_  | -1.35814100  | 2.30264500  | 8.29259500 L  |
| C-C_R | -3.40818900  | 2.92738600  | 8.30337300 L  |
| C-C_R | 2.96879500   | -0.34156200 | 5.57068800 L  |
| C-C_R | 2.06182500   | 1.80687400  | 6.33021300 L  |
| N-N_R | 1.28641800   | -4.90803800 | 5.24127300 L  |
| H-H_  | -5.98308000  | 1.13532900  | 7.01242400 L  |
| C-C_R | -4.72424900  | 2.60125600  | 7.95448700 L  |
| H-H_  | -3.20126000  | 3.87402800  | 8.78529900 L  |
| N-N_R | 2.19303900   | 2.94510000  | 6.51489800 L  |
| N-N_R | -5.77894200  | 3.49010600  | 8.22303000 L  |
| C-C_R | -7.02055900  | 2.99424400  | 8.66299900 L  |
| C-C_R | -5.59214000  | 4.87728800  | 8.06139700 L  |
| C-C_R | -7.07455500  | 1.94134400  | 9.58286300 L  |
| C-C_R | -8.21361900  | 3.54898000  | 8.19025300 L  |
| C-C_R | -6.13900600  | 5.77646300  | 8.98077600 L  |
| C-C_R | -4.85321200  | 5.36834700  | 6.98019100 L  |
| H-H_  | -6.15040500  | 1.51602800  | 9.95728500 L  |
| C-C_R | -8.29724600  | 1.45492500  | 10.01425300 L |
| H-H_  | -8.17623500  | 4.35750100  | 7.47133300 L  |
| C-C_R | -9.43199200  | 3.06172500  | 8.63794200 L  |
| H-H_  | -6.70158000  | 5.39821700  | 9.82699500 L  |
| C-C_R | -5.95553200  | 7.14051300  | 8.81349900 L  |
| H-H_  | -4.43333300  | 4.67447600  | 6.26181600 L  |

|       |              |             |               |
|-------|--------------|-------------|---------------|
| C-C_R | -4.66395600  | 6.73315300  | 6.83209700 L  |
| H-H_  | -8.32074400  | 0.64200100  | 10.73098700 L |
| C-C_R | -9.48395200  | 2.01193400  | 9.54846900 L  |
| H-H_  | -10.34990300 | 3.49968000  | 8.26030800 L  |
| C-C_R | -5.21457600  | 7.62678500  | 7.74292200 L  |
| H-H_  | -6.38207300  | 7.82552400  | 9.53668100 L  |
| H-H_  | -4.08842100  | 7.09912900  | 5.98954500 L  |
| H-H_  | -10.43921700 | 1.63532400  | 9.89342600 L  |
| H-H_  | -5.06752300  | 8.69398000  | 7.61974400 L  |
| C-C_R | 6.13366100   | -7.61757500 | -0.29340900 L |
| H-H_  | 5.10726200   | -7.74246500 | -0.62028400 L |
| C-C_R | 8.33127800   | -8.50987900 | 0.07552300 L  |
| H-H_  | 9.02717900   | -9.34165900 | 0.05319000 L  |
| C-C_R | 7.01604200   | -8.68970100 | -0.34141000 L |
| H-H_  | 6.68423300   | -9.65647800 | -0.69962500 L |
| C-C_R | 6.55455100   | -6.37730200 | 0.15838900 L  |
| C-C_R | 7.87439100   | -6.19755900 | 0.58551000 L  |
| H-H_  | 5.86829400   | -5.53962700 | 0.18436000 L  |
| N-N_R | 8.30467500   | -4.94051300 | 1.05586600 L  |
| C-C_R | 8.75927400   | -7.27846500 | 0.54455500 L  |
| C-C_R | 7.45856200   | -4.16382100 | 1.86502800 L  |
| C-C_R | 9.58715900   | -4.46855900 | 0.72415800 L  |
| H-H_  | 9.77878300   | -7.14572800 | 0.88550000 L  |
| C-C_R | 7.40261300   | -2.77539900 | 1.70003200 L  |
| C-C_R | 6.65113800   | -4.76257500 | 2.83835000 L  |
| C-C_R | 10.10293600  | -4.65841200 | -0.56113600 L |
| C-C_R | 10.36268400  | -3.80321300 | 1.67859700 L  |
| H-H_  | 7.99019600   | -2.30765200 | 0.91927300 L  |
| C-C_R | 6.58977500   | -2.00749200 | 2.50998900 L  |
| H-H_  | 6.68071700   | -5.83696600 | 2.97087200 L  |
| C-C_R | 5.82588400   | -3.98864700 | 3.63325400 L  |
| C-C_R | 11.37234100  | -4.19933600 | -0.87770800 L |
| H-H_  | 9.50143900   | -5.16475500 | -1.30686900 L |
| H-H_  | 9.96992300   | -3.66158900 | 2.67746000 L  |
| C-C_R | 11.62602200  | -3.33778000 | 1.34911100 L  |
| C-C_R | 5.79894500   | -2.59475800 | 3.50564200 L  |
| H-H_  | 6.54298700   | -0.93799500 | 2.34938000 L  |
| H-H_  | 5.18809900   | -4.45368100 | 4.37419700 L  |
| H-H_  | 11.75784900  | -4.35120600 | -1.87867300 L |
| C-C_R | 12.14093100  | -3.53377800 | 0.07250500 L  |
| H-H_  | 12.21618800  | -2.82815500 | 2.10224800 L  |
| C-C_R | 4.88438500   | -1.81216900 | 4.35667600 L  |
| H-H_  | 13.13096600  | -3.17654600 | -0.18093300 L |
| N-N_R | 3.74291600   | -2.42005200 | 4.65030400 L  |

|       |             |             |               |
|-------|-------------|-------------|---------------|
| C-C_R | 5.13259400  | -0.48518400 | 4.81179800 L  |
| N-N_R | 4.15752700  | 0.23081800  | 5.35554400 L  |
| C-C_R | 6.44574300  | 0.18331700  | 4.78066900 L  |
| C-C_R | 7.64657800  | -0.50644500 | 4.98845200 L  |
| C-C_R | 6.50199800  | 1.57302600  | 4.62043400 L  |
| C-C_R | 8.85776400  | 0.15808500  | 4.99738300 L  |
| H-H_  | 7.62880700  | -1.57288500 | 5.17423600 L  |
| H-H_  | 5.57473200  | 2.11735500  | 4.49873200 L  |
| C-C_R | 7.71151900  | 2.24278000  | 4.60964300 L  |
| H-H_  | 9.77558400  | -0.38726300 | 5.18233600 L  |
| C-C_R | 8.90930000  | 1.54058500  | 4.79152200 L  |
| H-H_  | 7.73784500  | 3.31380500  | 4.45477500 L  |
| N-N_R | 10.14250400 | 2.21118900  | 4.77621900 L  |
| C-C_R | 11.25764600 | 1.61544500  | 4.15773500 L  |
| C-C_R | 10.26225700 | 3.48410400  | 5.36867400 L  |
| C-C_R | 11.11045700 | 0.91869400  | 2.95522300 L  |
| C-C_R | 12.52714300 | 1.71527700  | 4.73704200 L  |
| C-C_R | 11.02909600 | 4.48040800  | 4.75697100 L  |
| C-C_R | 9.61334000  | 3.76462100  | 6.57437800 L  |
| H-H_  | 10.12966800 | 0.84668600  | 2.50007700 L  |
| C-C_R | 12.21028900 | 0.33146000  | 2.34951500 L  |
| H-H_  | 12.64444700 | 2.24551700  | 5.67399400 L  |
| C-C_R | 13.62234100 | 1.13416600  | 4.11747600 L  |
| H-H_  | 11.52369500 | 4.27016700  | 3.81540300 L  |
| C-C_R | 11.14656100 | 5.72769100  | 5.34810300 L  |
| H-H_  | 9.02495800  | 2.99194400  | 7.05592900 L  |
| C-C_R | 9.72648800  | 5.02061300  | 7.14937000 L  |
| H-H_  | 12.07782300 | -0.20072000 | 1.41439400 L  |
| C-C_R | 13.47277000 | 0.43776300  | 2.92291500 L  |
| H-H_  | 14.60040300 | 1.21785300  | 4.57934300 L  |
| C-C_R | 10.49508500 | 6.00739500  | 6.54376700 L  |
| H-H_  | 11.74085800 | 6.49274100  | 4.86048300 L  |
| H-H_  | 9.21658500  | 5.22364300  | 8.08327100 L  |
| H-H_  | 14.33174200 | -0.01490400 | 2.44240600 L  |
| H-H_  | 10.58310000 | 6.98749100  | 6.99891000 L  |
| C-C_R | 14.59989000 | 10.70095400 | -1.64817700 L |
| H-H_  | 15.56055000 | 10.25533100 | -1.41349700 L |
| C-C_R | 12.27380100 | 10.47871400 | -2.19823700 L |
| H-H_  | 11.41075700 | 9.85977500  | -2.41037400 L |
| C-C_R | 13.49876200 | 9.89203100  | -1.90534900 L |
| H-H_  | 13.59624800 | 8.81225900  | -1.87815300 L |
| C-C_R | 14.48145600 | 12.08126500 | -1.67506500 L |
| C-C_R | 13.25021900 | 12.67322700 | -1.97773800 L |
| H-H_  | 15.33757100 | 12.71022500 | -1.46217400 L |

|       |             |             |               |
|-------|-------------|-------------|---------------|
| N-N_R | 13.12787100 | 14.07625600 | -2.01622700 L |
| C-C_R | 12.14671900 | 11.85874000 | -2.24242100 L |
| C-C_R | 14.15387800 | 14.85899700 | -2.57110500 L |
| C-C_R | 11.97050700 | 14.69582200 | -1.50804200 L |
| H-H_  | 11.19521100 | 12.31438300 | -2.48901100 L |
| C-C_R | 14.50980800 | 16.07815100 | -1.98489300 L |
| C-C_R | 14.84241100 | 14.43008400 | -3.71252700 L |
| C-C_R | 11.37903700 | 14.23185000 | -0.32836500 L |
| C-C_R | 11.39677900 | 15.77947100 | -2.17874100 L |
| H-H_  | 14.01343500 | 16.39651700 | -1.07614000 L |
| C-C_R | 15.50171300 | 16.85944700 | -2.54351100 L |
| H-H_  | 14.57883300 | 13.48606500 | -4.17305300 L |
| C-C_R | 15.84569700 | 15.20979500 | -4.25559000 L |
| C-C_R | 10.23278000 | 14.84124800 | 0.16107900 L  |
| H-H_  | 11.82584600 | 13.39943300 | 0.19933700 L  |
| H-H_  | 11.84761200 | 16.13493600 | -3.09782300 L |
| C-C_R | 10.25696200 | 16.38681900 | -1.67583200 L |
| C-C_R | 16.17785800 | 16.45219200 | -3.70066300 L |
| H-H_  | 15.77864300 | 17.78749900 | -2.05979400 L |
| H-H_  | 16.39141800 | 14.87071900 | -5.12663700 L |
| H-H_  | 9.78722900  | 14.47298300 | 1.07865600 L  |
| C-C_R | 9.66572200  | 15.92188400 | -0.50510000 L |
| H-H_  | 9.82289300  | 17.22369800 | -2.21072900 L |
| C-C_R | 17.27310700 | 17.23743800 | -4.29829700 L |
| H-H_  | 8.77062500  | 16.39384300 | -0.11814800 L |
| N-N_R | 18.26122000 | 16.51462600 | -4.80676600 L |
| C-C_R | 17.34326900 | 18.65965400 | -4.30673300 L |
| C-C_R | 19.36968700 | 17.13047800 | -5.23088400 L |
| N-N_R | 18.47087100 | 19.27392500 | -4.63360100 L |
| C-C_R | 16.20998900 | 19.55856600 | -4.02016700 L |
| C-C_R | 19.51052800 | 18.54843700 | -5.05996700 L |
| C-C_R | 20.41523800 | 16.38213400 | -5.82165100 L |
| C-C_R | 14.89446900 | 19.25380700 | -4.38945000 L |
| C-C_R | 16.45831800 | 20.80590800 | -3.43271600 L |
| C-C_R | 20.73845200 | 19.17946400 | -5.36794700 L |
| C-C_R | 21.62149000 | 17.02551600 | -6.18786100 L |
| C-C_R | 20.25482700 | 14.99310300 | -6.04749700 L |
| C-C_R | 13.86160500 | 20.13773800 | -4.14798600 L |
| H-H_  | 14.68355700 | 18.32235600 | -4.90027900 L |
| H-H_  | 17.47828500 | 21.06492400 | -3.18081200 L |
| C-C_R | 15.42823700 | 21.68966500 | -3.17003400 L |
| C-C_R | 21.80585900 | 18.41995300 | -5.90262000 L |
| C-C_R | 20.89825100 | 20.56915300 | -5.14319400 L |
| N-N_R | 20.12361400 | 13.85487700 | -6.23218300 L |

|       |             |             |                |
|-------|-------------|-------------|----------------|
| H-H_  | 12.85332000 | 19.89771500 | -4.45998900 L  |
| C-C_R | 14.11215100 | 21.36364200 | -3.51792600 L  |
| H-H_  | 15.63516600 | 22.63630700 | -2.68810800 L  |
| N-N_R | 21.03010200 | 21.70661400 | -4.95841000 L  |
| N-N_R | 13.05748400 | 22.25238500 | -3.25037700 L  |
| C-C_R | 11.81727400 | 21.75639500 | -2.81035800 L  |
| C-C_R | 13.24566800 | 23.63954600 | -3.41096600 L  |
| C-C_R | 11.76264000 | 20.70425900 | -1.89059300 L  |
| C-C_R | 10.62280700 | 22.31125900 | -3.28315400 L  |
| C-C_R | 12.69803100 | 24.53808500 | -2.49153800 L  |
| C-C_R | 13.98382500 | 24.12996900 | -4.49212300 L  |
| H-H_  | 12.68602100 | 20.27830700 | -1.51612200 L  |
| C-C_R | 10.53917900 | 20.21720400 | -1.45915400 L  |
| H-H_  | 10.66096100 | 23.12041600 | -4.00212300 L  |
| C-C_R | 9.40520400  | 21.82464000 | -2.83551300 L  |
| H-H_  | 12.13548300 | 24.15973200 | -1.64631300 L  |
| C-C_R | 12.88086900 | 25.90289900 | -2.65891400 L  |
| H-H_  | 14.40309300 | 23.43675500 | -5.21159100 L  |
| C-C_R | 14.17324000 | 25.49606800 | -4.64135800 L  |
| H-H_  | 10.51568200 | 19.40428000 | -0.74242000 L  |
| C-C_R | 9.35247400  | 20.77421300 | -1.92493800 L  |
| H-H_  | 8.48729300  | 22.26259500 | -3.21314700 L  |
| C-C_R | 13.62262000 | 26.38970000 | -3.73053400 L  |
| H-H_  | 12.45512300 | 26.58843900 | -1.93677500 L  |
| H-H_  | 14.74877500 | 25.86204400 | -5.48391100 L  |
| H-H_  | 8.39720900  | 20.39760300 | -1.57998100 L  |
| H-H_  | 13.76954000 | 27.45549500 | -3.85356400 L  |
| C-C_R | 24.97008700 | 11.14470400 | -11.76681600 L |
| H-H_  | 23.94443200 | 11.02055700 | -12.09274600 L |
| C-C_R | 27.16834100 | 10.25163600 | -11.39778500 L |
| H-H_  | 27.86360400 | 9.42062000  | -11.42021700 L |
| C-C_R | 25.85387600 | 10.07245000 | -11.81476700 L |
| H-H_  | 25.52065900 | 9.10580100  | -12.17303200 L |
| C-C_R | 25.39095200 | 12.38508400 | -11.31402400 L |
| C-C_R | 26.71079100 | 12.56482700 | -10.88690300 L |
| H-H_  | 24.70472000 | 13.22265200 | -11.28904700 L |
| N-N_R | 27.14110100 | 13.82176600 | -10.41754100 L |
| C-C_R | 27.59570000 | 11.48381400 | -10.92885200 L |
| C-C_R | 26.29498800 | 14.59845800 | -9.60837900 L  |
| C-C_R | 28.42435500 | 14.29435600 | -10.74929700 L |
| H-H_  | 28.61582100 | 11.61589400 | -10.58681400 L |
| C-C_R | 26.24042100 | 15.98685900 | -9.77233100 L  |
| C-C_R | 25.48894600 | 13.99968300 | -8.63401300 L  |
| C-C_R | 28.94076900 | 14.10373900 | -12.03449300 L |



|       |             |             |                |
|-------|-------------|-------------|----------------|
| C-C_R | 29.19988000 | 14.95970200 | -9.79485900 L  |
| H-H_  | 26.82662100 | 16.45462700 | -10.55413400 L |
| C-C_R | 25.42620100 | 16.75478700 | -8.96341800 L  |
| H-H_  | 25.51791200 | 12.92594800 | -8.50258300 L  |
| C-C_R | 24.66371700 | 14.77350400 | -7.84010300 L  |
| C-C_R | 30.20953700 | 14.56357900 | -12.35116400 L |
| H-H_  | 28.33860900 | 13.59826700 | -12.77933100 L |
| H-H_  | 28.80711900 | 15.10132600 | -8.79599600 L  |
| C-C_R | 30.46321800 | 15.42513500 | -10.12434500 L |
| C-C_R | 24.63675200 | 16.16750000 | -7.96672100 L  |
| H-H_  | 25.37941300 | 17.82428400 | -9.12402700 L  |
| H-H_  | 24.02529500 | 14.30923400 | -7.09925900 L  |
| H-H_  | 30.59427500 | 14.41107300 | -13.35208000 L |
| C-C_R | 30.97799400 | 15.22773700 | -11.40080400 L |
| H-H_  | 31.05325100 | 15.93336000 | -9.37106000 L  |
| C-C_R | 23.72081100 | 16.95011000 | -7.11673100 L  |
| H-H_  | 31.96879900 | 15.58560500 | -11.65429000 L |
| N-N_R | 22.58008700 | 16.34297000 | -6.82215800 L  |
| C-C_R | 23.96899400 | 18.27720200 | -6.66061500 L  |
| N-N_R | 22.99459000 | 18.99233300 | -6.11776400 L  |
| C-C_R | 25.28280600 | 18.94483100 | -6.69263900 L  |
| C-C_R | 26.48441100 | 18.25570600 | -6.48490400 L  |
| C-C_R | 25.33983100 | 20.33517700 | -6.85292300 L  |
| C-C_R | 27.69559700 | 18.92023500 | -6.47597400 L  |
| H-H_  | 26.46520700 | 17.18950100 | -6.29817700 L  |
| H-H_  | 24.41115800 | 20.87963400 | -6.97467500 L  |
| C-C_R | 26.54794400 | 21.00505900 | -6.86376400 L  |
| H-H_  | 28.61275400 | 18.37575900 | -6.29012600 L  |
| C-C_R | 27.74572500 | 20.30286400 | -6.68188500 L  |
| H-H_  | 26.57424500 | 22.07619100 | -7.01763800 L  |
| N-N_R | 28.97893000 | 20.97346800 | -6.69718800 L  |
| C-C_R | 30.09481600 | 20.37846700 | -7.31472700 L  |
| C-C_R | 29.09868300 | 22.24638300 | -6.10473300 L  |
| C-C_R | 29.94752000 | 19.68020900 | -8.51808500 L  |
| C-C_R | 31.36418000 | 20.47689900 | -6.73527200 L  |
| C-C_R | 29.86552200 | 23.24268700 | -6.71643600 L  |
| C-C_R | 28.45051000 | 22.52764300 | -4.89808300 L  |
| H-H_  | 28.96686300 | 19.60960100 | -8.97337800 L  |
| C-C_R | 31.04671500 | 19.09373900 | -9.12389200 L  |
| H-H_  | 31.48087300 | 21.00779600 | -5.79941300 L  |
| C-C_R | 32.45953700 | 19.89708100 | -7.35598000 L  |
| H-H_  | 30.36012100 | 23.03244600 | -7.65800400 L  |
| C-C_R | 29.98298700 | 24.48997000 | -6.12530400 L  |
| H-H_  | 27.86138400 | 21.75422300 | -4.41747800 L  |

|       |             |             |                |
|-------|-------------|-------------|----------------|
| C-C_R | 28.56368400 | 23.78352800 | -4.32408500 L  |
| H-H_  | 30.91424800 | 18.56155900 | -10.05901300 L |
| C-C_R | 32.30919600 | 19.20004200 | -8.55049200 L  |
| H-H_  | 33.43746600 | 19.97936800 | -6.89396500 L  |
| C-C_R | 29.33225500 | 24.77041700 | -4.92869400 L  |
| H-H_  | 30.57805400 | 25.25565600 | -6.61297200 L  |
| H-H_  | 28.05298500 | 23.98602900 | -3.38914200 L  |
| H-H_  | 33.16891200 | 18.74811800 | -9.03005500 L  |
| H-H_  | 29.41952600 | 25.74977000 | -4.47449700 L  |
| C-C_R | 15.57746500 | 9.90580600  | 3.43174700 L   |
| H-H_  | 16.53812500 | 9.46018300  | 3.66642700 L   |
| C-C_R | 13.25137600 | 9.68356600  | 2.88168700 L   |
| H-H_  | 12.38833200 | 9.06462700  | 2.66955100 L   |
| C-C_R | 14.47697400 | 9.09611800  | 3.17467400 L   |
| H-H_  | 14.57384800 | 8.01700400  | 3.20077700 L   |
| C-C_R | 15.45903000 | 11.28611700 | 3.40485900 L   |
| C-C_R | 14.22779300 | 11.87807900 | 3.10218600 L   |
| H-H_  | 16.31514500 | 11.91507700 | 3.61775100 L   |
| N-N_R | 14.10544600 | 13.28110800 | 3.06369700 L   |
| C-C_R | 13.12429400 | 11.06359100 | 2.83750400 L   |
| C-C_R | 15.13145300 | 14.06384900 | 2.50881900 L   |
| C-C_R | 12.94808200 | 13.90067300 | 3.57188200 L   |
| H-H_  | 12.17278500 | 11.51923400 | 2.59091300 L   |
| C-C_R | 15.48738200 | 15.28300300 | 3.09503100 L   |
| C-C_R | 15.81998600 | 13.63493500 | 1.36739700 L   |
| C-C_R | 12.35661200 | 13.43670200 | 4.75155900 L   |
| C-C_R | 12.37435400 | 14.98432200 | 2.90118300 L   |
| H-H_  | 14.99103600 | 15.60126200 | 4.00279100 L   |
| C-C_R | 16.47992500 | 16.06353400 | 2.53651200 L   |
| H-H_  | 15.55640800 | 12.69091700 | 0.90687100 L   |
| C-C_R | 16.82327200 | 14.41464600 | 0.82433400 L   |
| C-C_R | 11.21101800 | 14.04522900 | 5.24010800 L   |
| H-H_  | 12.80405800 | 12.60352000 | 5.27936000 L   |
| H-H_  | 12.82582400 | 15.33902400 | 1.98220000 L   |
| C-C_R | 11.23453700 | 15.59167000 | 3.40409300 L   |
| C-C_R | 17.15543200 | 15.65704400 | 1.37926100 L   |
| H-H_  | 16.75621800 | 16.99235100 | 3.02013000 L   |
| H-H_  | 17.36963000 | 14.07480700 | -0.04661400 L  |
| H-H_  | 10.76480400 | 13.67783500 | 6.15858100 L   |
| C-C_R | 10.64393400 | 15.12597100 | 4.57492300 L   |
| H-H_  | 10.80110500 | 16.42778500 | 2.86929400 L   |
| C-C_R | 18.25132000 | 16.44152500 | 0.78172600 L   |
| H-H_  | 9.74886300  | 15.59782400 | 4.96088100 L   |
| N-N_R | 19.23943200 | 15.71871400 | 0.27325700 L   |

|       |             |             |               |
|-------|-------------|-------------|---------------|
| C-C_R | 18.32084400 | 17.86450600 | 0.77319100 L  |
| C-C_R | 20.34726200 | 16.33533000 | -0.15095900 L |
| N-N_R | 19.44844500 | 18.47877700 | 0.44632300 L  |
| C-C_R | 17.18756400 | 18.76341800 | 1.05975700 L  |
| C-C_R | 20.48810300 | 17.75328900 | 0.01995700 L  |
| C-C_R | 21.39283800 | 15.58687900 | -0.74272100 L |
| C-C_R | 15.87204400 | 18.45865900 | 0.69047500 L  |
| C-C_R | 17.43653000 | 20.00999500 | 1.64730700 L  |
| C-C_R | 21.71605300 | 18.38420900 | -0.28901700 L |
| C-C_R | 22.59906400 | 16.23036700 | -1.10793700 L |
| C-C_R | 21.23303900 | 14.19719000 | -0.96747400 L |
| C-C_R | 14.83918000 | 19.34259000 | 0.93193800 L  |
| H-H_  | 15.66113100 | 17.52720700 | 0.17964500 L  |
| H-H_  | 18.45649700 | 20.26901200 | 1.89921100 L  |
| C-C_R | 16.40644900 | 20.89375200 | 1.90998900 L  |
| C-C_R | 22.78343300 | 17.62480400 | -0.82269600 L |
| C-C_R | 21.87582600 | 19.77400400 | -0.06327000 L |
| N-N_R | 21.10118800 | 13.05972900 | -1.15225800 L |
| H-H_  | 13.83092000 | 19.10245900 | 0.61894200 L  |
| C-C_R | 15.08975100 | 20.56838700 | 1.56100400 L  |
| H-H_  | 16.61274000 | 21.84115900 | 2.39181700 L  |
| N-N_R | 22.00767700 | 20.91146600 | 0.12151500 L  |
| N-N_R | 14.03569600 | 21.45647300 | 1.82964600 L  |
| C-C_R | 12.79484800 | 20.96124700 | 2.26956600 L  |
| C-C_R | 14.22324300 | 22.84439700 | 1.66895800 L  |
| C-C_R | 12.74085200 | 19.90834600 | 3.18943000 L  |
| C-C_R | 11.60101900 | 21.51534700 | 1.79686900 L  |
| C-C_R | 13.67560600 | 23.74293600 | 2.58838600 L  |
| C-C_R | 14.96140000 | 23.33482000 | 0.58780100 L  |
| H-H_  | 13.66359500 | 19.48315800 | 3.56380200 L  |
| C-C_R | 11.51675400 | 19.42205600 | 3.62077000 L  |
| H-H_  | 11.63917300 | 22.32450300 | 1.07790000 L  |
| C-C_R | 10.38277900 | 21.02949100 | 2.24441100 L  |
| H-H_  | 13.11305800 | 23.36458300 | 3.43361100 L  |
| C-C_R | 13.85910600 | 25.10688000 | 2.42011500 L  |
| H-H_  | 15.38066800 | 22.64160600 | -0.13166600 L |
| C-C_R | 15.15145200 | 24.70015600 | 0.43866500 L  |
| H-H_  | 11.49389400 | 18.60836800 | 4.33760300 L  |
| C-C_R | 10.33004900 | 19.97906400 | 3.15498700 L  |
| H-H_  | 9.46550500  | 21.46668300 | 1.86687600 L  |
| C-C_R | 14.60019400 | 25.59455100 | 1.34939000 L  |
| H-H_  | 13.43333500 | 25.79252600 | 3.14324800 L  |
| H-H_  | 15.72698700 | 25.06613200 | -0.40388800 L |
| H-H_  | 9.37542100  | 19.60169100 | 3.50004200 L  |

|       |             |             |               |
|-------|-------------|-------------|---------------|
| H-H_  | 14.74711500 | 26.66034700 | 1.22636000 L  |
| C-C_R | 25.94766200 | 10.34955500 | -6.68689100 L |
| H-H_  | 24.92203200 | 10.22530100 | -7.01381600 L |
| C-C_R | 28.14591600 | 9.45648700  | -6.31786100 L |
| H-H_  | 28.84117900 | 8.62547200  | -6.34029300 L |
| C-C_R | 26.83145000 | 9.27730200  | -6.73484300 L |
| H-H_  | 26.49887100 | 8.30988800  | -7.09300900 L |
| C-C_R | 26.36918900 | 11.58906400 | -6.23499500 L |
| C-C_R | 27.68836600 | 11.76967800 | -5.80697800 L |
| H-H_  | 25.68229500 | 12.42750400 | -6.20912200 L |
| N-N_R | 28.11867500 | 13.02661800 | -5.33761600 L |
| C-C_R | 28.57391200 | 10.68790100 | -5.84882900 L |
| C-C_R | 27.27256300 | 13.80331000 | -4.52845500 L |
| C-C_R | 29.40193000 | 13.49920800 | -5.66937300 L |
| H-H_  | 29.59339600 | 10.82074600 | -5.50689000 L |
| C-C_R | 27.21802100 | 15.19160300 | -4.69340100 L |
| C-C_R | 26.46654600 | 13.20442700 | -3.55508300 L |
| C-C_R | 29.91834400 | 13.30859100 | -6.95456800 L |
| C-C_R | 30.17809200 | 14.16378900 | -4.71483600 L |
| H-H_  | 27.80483300 | 15.65871500 | -5.47411100 L |
| C-C_R | 26.40377600 | 15.95963900 | -3.88349300 L |
| H-H_  | 26.49612500 | 12.13003600 | -3.42256000 L |
| C-C_R | 25.64129200 | 13.97835500 | -2.76017900 L |
| C-C_R | 31.18774900 | 13.76766600 | -7.27114100 L |
| H-H_  | 29.31682100 | 12.80235500 | -7.69930800 L |
| H-H_  | 29.78533100 | 14.30541300 | -3.71597300 L |
| C-C_R | 31.44079300 | 14.62998700 | -5.04442100 L |
| C-C_R | 25.61435300 | 15.37224500 | -2.88779100 L |
| H-H_  | 26.35762500 | 17.02837200 | -4.04400400 L |
| H-H_  | 25.00350700 | 13.51332200 | -2.01923600 L |
| H-H_  | 31.57248700 | 13.61516000 | -8.27205700 L |
| C-C_R | 31.95556900 | 14.43258800 | -6.32087900 L |
| H-H_  | 32.03082600 | 15.13821200 | -4.29113600 L |
| C-C_R | 24.69838600 | 16.15496200 | -2.03680700 L |
| H-H_  | 32.94637400 | 14.79045600 | -6.57436600 L |
| N-N_R | 23.55766100 | 15.54782100 | -1.74223300 L |
| C-C_R | 24.94723200 | 17.48118300 | -1.58158600 L |
| N-N_R | 23.97216500 | 18.19718500 | -1.03784000 L |
| C-C_R | 26.26038100 | 18.14968300 | -1.61271500 L |
| C-C_R | 27.46198600 | 17.46055700 | -1.40498000 L |
| C-C_R | 26.31740600 | 19.54002900 | -1.77299800 L |
| C-C_R | 28.67317200 | 18.12508700 | -1.39605000 L |
| H-H_  | 27.44280700 | 16.39424600 | -1.21924600 L |
| H-H_  | 25.38873300 | 20.08448500 | -1.89475000 L |

|       |             |             |               |
|-------|-------------|-------------|---------------|
| C-C_R | 27.52615700 | 20.20914700 | -1.78374100 L |
| H-H_  | 29.59096600 | 17.57984600 | -1.21010300 L |
| C-C_R | 28.72330000 | 19.50771500 | -1.60196100 L |
| H-H_  | 27.55245700 | 21.28027800 | -1.93761500 L |
| N-N_R | 29.95714200 | 20.17755500 | -1.61716500 L |
| C-C_R | 31.07305400 | 19.58244800 | -2.23569800 L |
| C-C_R | 30.07689500 | 21.45047000 | -1.02470900 L |
| C-C_R | 30.92509500 | 18.88506100 | -3.43816100 L |
| C-C_R | 32.34178000 | 19.68164400 | -1.65634200 L |
| C-C_R | 30.84373400 | 22.44677400 | -1.63641300 L |
| C-C_R | 29.42872200 | 21.73173100 | 0.18194000 L  |
| H-H_  | 29.94443800 | 18.81445200 | -3.89345400 L |
| C-C_R | 32.02429000 | 18.29859100 | -4.04396800 L |
| H-H_  | 32.45844800 | 20.21264700 | -0.71948900 L |
| C-C_R | 33.43774900 | 19.10116800 | -2.27595700 L |
| H-H_  | 31.33833300 | 22.23653300 | -2.57798100 L |
| C-C_R | 30.96056200 | 23.69482100 | -1.04538000 L |
| H-H_  | 28.83959600 | 20.95831000 | 0.66254500 L  |
| C-C_R | 29.54125800 | 22.98838000 | 0.75583900 L  |
| H-H_  | 31.89182300 | 17.76641100 | -4.97908900 L |
| C-C_R | 33.28740800 | 18.40412900 | -3.47046900 L |
| H-H_  | 34.41504100 | 19.18421900 | -1.81404000 L |
| C-C_R | 30.30985500 | 23.97516100 | 0.15023600 L  |
| H-H_  | 31.55562800 | 24.46050800 | -1.53304800 L |
| H-H_  | 29.03122200 | 23.19001000 | 1.68988800 L  |
| H-H_  | 34.14715000 | 17.95209800 | -3.95102600 L |
| H-H_  | 30.39773800 | 24.95385700 | 0.60552600 L  |
| C-C_R | 16.55504000 | 9.11065700  | 8.51167100 L  |
| H-H_  | 17.51570000 | 8.66503400  | 8.74635200 L  |
| C-C_R | 14.22895100 | 8.88841700  | 7.96161200 L  |
| H-H_  | 13.36590600 | 8.26947800  | 7.74947500 L  |
| C-C_R | 15.45454900 | 8.30097000  | 8.25459800 L  |
| H-H_  | 15.55142300 | 7.22185600  | 8.28070200 L  |
| C-C_R | 16.43660500 | 10.49096900 | 8.48478300 L  |
| C-C_R | 15.20536800 | 11.08293000 | 8.18211100 L  |
| H-H_  | 17.29335700 | 11.11916400 | 8.69777400 L  |
| N-N_R | 15.08302100 | 12.48596000 | 8.14362100 L  |
| C-C_R | 14.10250600 | 10.26767900 | 7.91752700 L  |
| C-C_R | 16.10969000 | 13.26782900 | 7.58784800 L  |
| C-C_R | 13.92629400 | 13.10476100 | 8.65190500 L  |
| H-H_  | 13.15036000 | 10.72408600 | 7.67083800 L  |
| C-C_R | 16.46495700 | 14.48785400 | 8.17495500 L  |
| C-C_R | 16.79756100 | 12.83978700 | 6.44732200 L  |
| C-C_R | 13.33418600 | 12.64155300 | 9.83148400 L  |

|       |             |             |               |
|-------|-------------|-------------|---------------|
| C-C_R | 13.35195400 | 14.18906700 | 7.98011400 L  |
| H-H_  | 15.96924800 | 14.80534900 | 9.08281400 L  |
| C-C_R | 17.45749900 | 15.26838600 | 7.61643600 L  |
| H-H_  | 16.53462000 | 11.89500400 | 5.98689400 L  |
| C-C_R | 17.80148400 | 13.61873400 | 5.90435700 L  |
| C-C_R | 12.18859300 | 13.25008100 | 10.32003200 L |
| H-H_  | 13.78163300 | 11.80837200 | 10.35928500 L |
| H-H_  | 13.80339900 | 14.54387500 | 7.06212400 L  |
| C-C_R | 12.21274900 | 14.79575800 | 8.48411600 L  |
| C-C_R | 18.13364500 | 14.86113100 | 6.45928400 L  |
| H-H_  | 17.73443000 | 16.19643800 | 8.10015300 L  |
| H-H_  | 18.34720500 | 13.27965800 | 5.03331100 L  |
| H-H_  | 11.74240400 | 12.88257900 | 11.23751100 L |
| C-C_R | 11.62150900 | 14.33082300 | 9.65484700 L  |
| H-H_  | 11.77870500 | 15.63253000 | 7.94822400 L  |
| C-C_R | 19.22889400 | 15.64637700 | 5.86165000 L  |
| H-H_  | 10.72643700 | 14.80267500 | 10.04080600 L |
| N-N_R | 20.21700700 | 14.92356500 | 5.35318100 L  |
| C-C_R | 19.29841800 | 17.06935800 | 5.85311600 L  |
| C-C_R | 21.32547400 | 15.53941700 | 4.92906400 L  |
| N-N_R | 20.42665800 | 17.68286400 | 5.52634600 L  |
| C-C_R | 18.16516400 | 17.96816300 | 6.13868800 L  |
| C-C_R | 21.46567800 | 16.95814000 | 5.09988200 L  |
| C-C_R | 22.37041300 | 14.79173100 | 4.33720400 L  |
| C-C_R | 16.84961800 | 17.66351100 | 5.77039900 L  |
| C-C_R | 18.41410500 | 19.21484700 | 6.72723100 L  |
| C-C_R | 22.69362700 | 17.58906000 | 4.79090700 L  |
| C-C_R | 23.57727600 | 15.43445500 | 3.97208600 L  |
| C-C_R | 22.21061400 | 13.40204200 | 4.11245100 L  |
| C-C_R | 15.81675400 | 18.54744100 | 6.01186300 L  |
| H-H_  | 16.63870600 | 16.73205900 | 5.25957000 L  |
| H-H_  | 19.43407200 | 19.47386300 | 6.97913500 L  |
| C-C_R | 17.38402400 | 20.09860400 | 6.98991300 L  |
| C-C_R | 23.76100800 | 16.82965600 | 4.25722800 L  |
| C-C_R | 22.85403800 | 18.97809200 | 5.01675300 L  |
| N-N_R | 22.07940000 | 12.26381600 | 3.92776500 L  |
| H-H_  | 14.80913200 | 18.30654700 | 5.69896500 L  |
| C-C_R | 16.06796300 | 19.77247400 | 6.64102700 L  |
| H-H_  | 17.59095200 | 21.04524600 | 7.47184000 L  |
| N-N_R | 22.98525100 | 20.11631800 | 5.20143900 L  |
| N-N_R | 15.01327100 | 20.66132400 | 6.90957100 L  |
| C-C_R | 13.77242300 | 20.16609800 | 7.34949000 L  |
| C-C_R | 15.20084300 | 22.04914200 | 6.74788900 L  |
| C-C_R | 13.71842700 | 19.11319800 | 8.26935500 L  |

|       |             |             |               |
|-------|-------------|-------------|---------------|
| C-C_R | 12.57859400 | 20.72019800 | 6.87679400 L  |
| C-C_R | 14.65320600 | 22.94768100 | 7.66731700 L  |
| C-C_R | 15.93900000 | 22.53956500 | 5.66673200 L  |
| H-H_  | 14.64180700 | 18.68724600 | 8.64382500 L  |
| C-C_R | 12.49496600 | 18.62614300 | 8.70079400 L  |
| H-H_  | 12.61674800 | 21.52935500 | 6.15782400 L  |
| C-C_R | 11.36099100 | 20.23357900 | 7.32443400 L  |
| H-H_  | 14.09063200 | 22.56943500 | 8.51353600 L  |
| C-C_R | 14.83668100 | 24.31173100 | 7.50003900 L  |
| H-H_  | 16.35888000 | 21.84569400 | 4.94835700 L  |
| C-C_R | 16.12902700 | 23.90500700 | 5.51858900 L  |
| H-H_  | 12.47146900 | 17.81321900 | 9.41752700 L  |
| C-C_R | 11.30826100 | 19.18315200 | 8.23501000 L  |
| H-H_  | 10.44308000 | 20.67153400 | 6.94680000 L  |
| C-C_R | 15.57840600 | 24.79863900 | 6.42941300 L  |
| H-H_  | 14.41091000 | 24.99737800 | 8.22317200 L  |
| H-H_  | 16.70456200 | 24.27098300 | 4.67603700 L  |
| H-H_  | 10.35299500 | 18.80654200 | 8.57996600 L  |
| H-H_  | 15.72469000 | 25.86519800 | 6.30628400 L  |
| C-C_R | 26.92587400 | 9.55364300  | -1.60686800 L |
| H-H_  | 25.90024500 | 9.42938900  | -1.93379200 L |
| C-C_R | 29.12349000 | 8.66133900  | -1.23793600 L |
| H-H_  | 29.81939100 | 7.82955900  | -1.26027000 L |
| C-C_R | 27.80902500 | 8.48215300  | -1.65491800 L |
| H-H_  | 27.47644500 | 7.51474000  | -2.01308500 L |
| C-C_R | 27.34676400 | 10.79391600 | -1.15507000 L |
| C-C_R | 28.66660300 | 10.97365900 | -0.72794900 L |
| H-H_  | 26.66050700 | 11.63159100 | -1.12909900 L |
| N-N_R | 29.09688700 | 12.23070500 | -0.25759300 L |
| C-C_R | 29.55148700 | 9.89275300  | -0.76890400 L |
| C-C_R | 28.25077500 | 13.00739700 | 0.55156800 L  |
| C-C_R | 30.38014200 | 12.70329500 | -0.58935000 L |
| H-H_  | 30.57099600 | 10.02549000 | -0.42795900 L |
| C-C_R | 28.19559600 | 14.39645500 | 0.38652400 L  |
| C-C_R | 27.44412100 | 12.40927900 | 1.52484200 L  |
| C-C_R | 30.89591900 | 12.51344200 | -1.87464400 L |
| C-C_R | 31.15566600 | 13.36864100 | 0.36508900 L  |
| H-H_  | 28.78240800 | 14.86356600 | -0.39418700 L |
| C-C_R | 27.38198800 | 15.16372600 | 1.19653000 L  |
| H-H_  | 27.47369900 | 11.33488800 | 1.65736400 L  |
| C-C_R | 26.61886700 | 13.18320700 | 2.31974600 L  |
| C-C_R | 32.16532400 | 12.97251800 | -2.19121600 L |
| H-H_  | 30.29442100 | 12.00709900 | -2.62037700 L |
| H-H_  | 30.76290600 | 13.51026500 | 1.36395100 L  |

|       |             |             |               |
|-------|-------------|-------------|---------------|
| C-C_R | 32.41900500 | 13.83407400 | 0.03560200 L  |
| C-C_R | 26.59192700 | 14.57709600 | 2.19213400 L  |
| H-H_  | 27.33520000 | 16.23322300 | 1.03592000 L  |
| H-H_  | 25.98108200 | 12.71817300 | 3.06068800 L  |
| H-H_  | 32.55006200 | 12.82001200 | -3.19213200 L |
| C-C_R | 32.93314300 | 13.63744000 | -1.24095500 L |
| H-H_  | 33.00840000 | 14.34306300 | 0.78878800 L  |
| C-C_R | 25.67659800 | 15.35904900 | 3.04321600 L  |
| H-H_  | 33.92394800 | 13.99530800 | -1.49444200 L |
| N-N_R | 24.53589900 | 14.75180200 | 3.33679600 L  |
| C-C_R | 25.92480700 | 16.68603400 | 3.49833900 L  |
| N-N_R | 24.94974000 | 17.40203600 | 4.04208400 L  |
| C-C_R | 27.23795600 | 17.35453500 | 3.46720900 L  |
| C-C_R | 28.43956000 | 16.66540900 | 3.67494400 L  |
| C-C_R | 27.29498000 | 18.74488000 | 3.30692600 L  |
| C-C_R | 29.65074700 | 17.32993900 | 3.68387500 L  |
| H-H_  | 28.42101900 | 15.59833300 | 3.86077700 L  |
| H-H_  | 26.36694500 | 19.28857300 | 3.18527300 L  |
| C-C_R | 28.50373100 | 19.41399800 | 3.29618400 L  |
| H-H_  | 30.56856600 | 16.78459100 | 3.86882800 L  |
| C-C_R | 29.70151200 | 18.71180300 | 3.47806300 L  |
| H-H_  | 28.53005700 | 20.48502300 | 3.14131600 L  |
| N-N_R | 30.93471700 | 19.38240700 | 3.46275900 L  |
| C-C_R | 32.05062900 | 18.78729900 | 2.84422600 L  |
| C-C_R | 31.05446900 | 20.65532200 | 4.05521500 L  |
| C-C_R | 31.90266900 | 18.08991200 | 1.64176400 L  |
| C-C_R | 33.31935500 | 18.88649500 | 3.42358300 L  |
| C-C_R | 31.82130900 | 21.65162600 | 3.44351100 L  |
| C-C_R | 30.40632200 | 20.93647500 | 5.26087000 L  |
| H-H_  | 30.92265000 | 18.01854000 | 1.18656900 L  |
| C-C_R | 33.00250200 | 17.50267800 | 1.03605500 L  |
| H-H_  | 33.43666000 | 19.41673500 | 4.36053400 L  |
| C-C_R | 34.41532400 | 18.30602000 | 2.80396800 L  |
| H-H_  | 32.31590700 | 21.44138500 | 2.50194400 L  |
| C-C_R | 31.93877400 | 22.89890900 | 4.03464300 L  |
| H-H_  | 29.81717100 | 20.16316200 | 5.74246900 L  |
| C-C_R | 30.51947000 | 22.19246700 | 5.83586200 L  |
| H-H_  | 32.87003500 | 16.97049800 | 0.10093400 L  |
| C-C_R | 34.26498200 | 17.60898100 | 1.60945500 L  |
| H-H_  | 35.39261600 | 18.38907100 | 3.26588400 L  |
| C-C_R | 31.28806700 | 23.17924900 | 5.23025900 L  |
| H-H_  | 32.53384100 | 23.66459500 | 3.54697500 L  |
| H-H_  | 30.00879700 | 22.39486100 | 6.76981200 L  |
| H-H_  | 35.12472400 | 17.15695000 | 1.12889800 L  |



|       |              |             |               |
|-------|--------------|-------------|---------------|
| H-H_  | 31.37531200  | 24.15870900 | 5.68545100 L  |
| C-C_R | -24.70644300 | 15.72878700 | -3.20103200 L |
| H-H_  | -23.74642100 | 15.28392900 | -2.96645100 L |
| C-C_R | -27.03316900 | 15.50731100 | -3.75119000 L |
| H-H_  | -27.89634700 | 14.88697200 | -3.96318000 L |
| C-C_R | -25.80834100 | 14.91922800 | -3.45815500 L |
| H-H_  | -25.71008600 | 13.84009300 | -3.43100800 L |
| C-C_R | -24.82551500 | 17.10986300 | -3.22801900 L |
| C-C_R | -26.05611500 | 17.70106000 | -3.53059300 L |
| H-H_  | -23.96953300 | 17.73742200 | -3.01498000 L |
| N-N_R | -26.17909900 | 19.10485400 | -3.56918100 L |
| C-C_R | -27.15961400 | 16.88657300 | -3.79527500 L |
| C-C_R | -25.15322600 | 19.88619500 | -4.12391100 L |
| C-C_R | -27.33582600 | 19.72365500 | -3.06089700 L |
| H-H_  | -28.11176000 | 17.34298000 | -4.04196500 L |
| C-C_R | -24.79716300 | 21.10674800 | -3.53784700 L |
| C-C_R | -24.46533000 | 19.45804500 | -5.26543200 L |
| C-C_R | -27.92806600 | 19.25904700 | -1.88117100 L |
| C-C_R | -27.91032400 | 20.80666800 | -3.73154700 L |
| H-H_  | -25.29289800 | 21.42435100 | -2.62899400 L |
| C-C_R | -23.80462100 | 21.88728000 | -4.09636600 L |
| H-H_  | -24.72750000 | 18.51389800 | -5.72590800 L |
| C-C_R | -23.46063600 | 20.23762800 | -5.80844500 L |
| C-C_R | -29.07432300 | 19.86844600 | -1.39172800 L |
| H-H_  | -27.48048700 | 18.42726600 | -1.35351800 L |
| H-H_  | -27.45949200 | 21.16213300 | -4.65062900 L |
| C-C_R | -29.04937100 | 21.41465200 | -3.22868600 L |
| C-C_R | -23.12924600 | 21.47938900 | -5.25346900 L |
| H-H_  | -23.52769100 | 22.81533300 | -3.61264900 L |
| H-H_  | -22.91568500 | 19.89791700 | -6.67944300 L |
| H-H_  | -29.51910400 | 19.50081600 | -0.47419800 L |
| C-C_R | -29.64061100 | 20.94971700 | -2.05795500 L |
| H-H_  | -29.48344000 | 22.25153100 | -3.76358400 L |
| C-C_R | -22.03322600 | 22.26527100 | -5.85115200 L |
| H-H_  | -30.53570900 | 21.42167700 | -1.67100300 L |
| N-N_R | -21.04588300 | 21.54182300 | -6.35957200 L |
| C-C_R | -21.96447200 | 23.68761600 | -5.85963800 L |
| C-C_R | -19.93741600 | 22.15767500 | -6.78369000 L |
| N-N_R | -20.83546300 | 24.30175900 | -6.18645600 L |
| C-C_R | -23.09634400 | 24.58640000 | -5.57302200 L |
| C-C_R | -19.79657500 | 23.57563400 | -6.61277300 L |
| C-C_R | -18.89109600 | 21.40996800 | -7.37450600 L |
| C-C_R | -24.41263500 | 24.28100500 | -5.94225600 L |
| C-C_R | -22.84878500 | 25.83310500 | -4.98552200 L |

|       |              |             |                |
|-------|--------------|-------------|----------------|
| C-C_R | -18.56865100 | 24.20666100 | -6.92075400 L  |
| C-C_R | -17.68561400 | 22.05271300 | -7.74066700 L  |
| C-C_R | -19.05227600 | 20.02030000 | -7.60030300 L  |
| C-C_R | -25.44472800 | 25.16557100 | -5.70084100 L  |
| H-H_  | -24.62354700 | 23.34955300 | -6.45308500 L  |
| H-H_  | -21.82804900 | 26.09275800 | -4.73366700 L  |
| C-C_R | -23.87809700 | 26.71749800 | -4.72288900 L  |
| C-C_R | -17.50047500 | 23.44778600 | -7.45547500 L  |
| C-C_R | -18.40808200 | 25.59698600 | -6.69604900 L  |
| N-N_R | -19.18349000 | 18.88207400 | -7.78498900 L  |
| H-H_  | -26.45301400 | 24.92554800 | -6.01284400 L  |
| C-C_R | -25.19418200 | 26.39147600 | -5.07078100 L  |
| H-H_  | -23.67116800 | 27.66414100 | -4.24096200 L  |
| N-N_R | -18.27623200 | 26.73444800 | -6.51126500 L  |
| N-N_R | -26.24884900 | 27.28021800 | -4.80323200 L  |
| C-C_R | -27.49046700 | 26.78435700 | -4.36326300 L  |
| C-C_R | -26.06143500 | 28.66674300 | -4.96377200 L  |
| C-C_R | -27.54446300 | 25.73145600 | -3.44339900 L  |
| C-C_R | -28.68352600 | 27.33909200 | -4.83600800 L  |
| C-C_R | -26.60894000 | 29.56668200 | -4.04449200 L  |
| C-C_R | -25.32250800 | 29.15780200 | -6.04497800 L  |
| H-H_  | -26.62031300 | 25.30614000 | -3.06897700 L  |
| C-C_R | -28.76715400 | 25.24503800 | -3.01200900 L  |
| H-H_  | -28.64614300 | 28.14761300 | -5.55492900 L  |
| C-C_R | -29.90189900 | 26.85183700 | -4.38831900 L  |
| H-H_  | -27.17148800 | 29.18832900 | -3.19926700 L  |
| C-C_R | -26.42546500 | 30.93073200 | -4.21176900 L  |
| H-H_  | -24.90324000 | 28.46458800 | -6.76444600 L  |
| C-C_R | -25.13386400 | 30.52326500 | -6.19416500 L  |
| H-H_  | -28.79065100 | 24.43211300 | -2.29527500 L  |
| C-C_R | -29.95385900 | 25.80204600 | -3.47779200 L  |
| H-H_  | -30.81981100 | 27.28979200 | -4.76595400 L  |
| C-C_R | -25.68448400 | 31.41689700 | -5.28334000 L  |
| H-H_  | -26.85198000 | 31.61563600 | -3.48958100 L  |
| H-H_  | -24.55832800 | 30.88924100 | -7.03671700 L  |
| H-H_  | -30.90912500 | 25.42543600 | -3.13283600 L  |
| H-H_  | -25.53679300 | 32.48332800 | -5.40641900 L  |
| C-C_R | -14.33624600 | 16.17253700 | -13.31967000 L |
| H-H_  | -15.36267100 | 16.04775400 | -13.64555200 L |
| C-C_R | -12.13799300 | 15.27946900 | -12.95064000 L |
| H-H_  | -11.44272900 | 14.44845400 | -12.97307200 L |
| C-C_R | -13.45322800 | 15.09964700 | -13.36757300 L |
| H-H_  | -13.78567500 | 14.13363400 | -13.72588700 L |
| C-C_R | -13.91538200 | 17.41291700 | -12.86687900 L |

|       |              |             |                |
|-------|--------------|-------------|----------------|
| C-C_R | -12.59554200 | 17.59266000 | -12.43975800 L |
| H-H_  | -14.60161300 | 18.25048500 | -12.84190200 L |
| N-N_R | -12.16523300 | 18.84959900 | -11.97039600 L |
| C-C_R | -11.71063300 | 16.51164700 | -12.48170700 L |
| C-C_R | -13.01134500 | 19.62629100 | -11.16123400 L |
| C-C_R | -10.88274900 | 19.32155400 | -12.30210300 L |
| H-H_  | -10.69051200 | 16.64372700 | -12.13966900 L |
| C-C_R | -13.06668300 | 21.01405600 | -11.32513700 L |
| C-C_R | -13.81815800 | 19.02688000 | -10.18681900 L |
| C-C_R | -10.36633400 | 19.13093600 | -13.58729900 L |
| C-C_R | -10.10722400 | 19.98689900 | -11.34766500 L |
| H-H_  | -12.47971200 | 21.48246100 | -12.10698900 L |
| C-C_R | -13.88013200 | 21.78262000 | -10.51627300 L |
| H-H_  | -13.78919100 | 17.95314600 | -10.05538900 L |
| C-C_R | -14.64338600 | 19.80070100 | -9.39290900 L  |
| C-C_R | -9.09756600  | 19.59077600 | -13.90397000 L |
| H-H_  | -10.96849500 | 18.62546400 | -14.33213700 L |
| H-H_  | -10.49998500 | 20.12852300 | -10.34880200 L |
| C-C_R | -8.84388500  | 20.45233200 | -11.67715100 L |
| C-C_R | -14.67098900 | 21.19546200 | -9.51962600 L  |
| H-H_  | -13.92692100 | 22.85211800 | -10.67688200 L |
| H-H_  | -15.28180800 | 19.33643100 | -8.65206500 L  |
| H-H_  | -8.71205800  | 19.43890600 | -14.90493400 L |
| C-C_R | -8.32833900  | 20.25557000 | -12.95365800 L |
| H-H_  | -8.25372000  | 20.96195800 | -10.92401400 L |
| C-C_R | -15.58552200 | 21.97794300 | -8.66958600 L  |
| H-H_  | -7.33830500  | 20.61280200 | -13.20709600 L |
| N-N_R | -16.72701700 | 21.37016700 | -8.37496400 L  |
| C-C_R | -15.33733900 | 23.30503600 | -8.21347000 L  |
| N-N_R | -16.31238000 | 24.02093100 | -7.67071800 L  |
| C-C_R | -14.02352700 | 23.97266500 | -8.24549400 L  |
| C-C_R | -12.82333000 | 23.28366700 | -8.03780900 L  |
| C-C_R | -13.96727300 | 25.36237400 | -8.40572900 L  |
| C-C_R | -11.61150600 | 23.94743300 | -8.02878000 L  |
| H-H_  | -12.84112700 | 22.21733400 | -7.85103200 L  |
| H-H_  | -14.89517600 | 25.90746700 | -8.52752900 L  |
| C-C_R | -12.75838900 | 26.03289300 | -8.41661900 L  |
| H-H_  | -10.69434900 | 23.40295600 | -7.84293200 L  |
| C-C_R | -11.56060800 | 25.33069700 | -8.23474000 L  |
| H-H_  | -12.73208800 | 27.10402400 | -8.57049200 L  |
| N-N_R | -10.32740300 | 26.00130100 | -8.25004300 L  |
| C-C_R | -9.21228700  | 25.40566500 | -8.86753300 L  |
| C-C_R | -10.20765100 | 27.27421600 | -7.65758700 L  |
| C-C_R | -9.35881300  | 24.70804200 | -10.07094000 L |

|       |              |             |                |
|-------|--------------|-------------|----------------|
| C-C_R | -7.94215300  | 25.50473200 | -8.28812700 L  |
| C-C_R | -9.44081100  | 28.27052000 | -8.26929100 L  |
| C-C_R | -10.85659400 | 27.55484100 | -6.45088900 L  |
| H-H_  | -10.34024000 | 24.63679800 | -10.52618400 L |
| C-C_R | -8.25961800  | 24.12157200 | -10.67674700 L |
| H-H_  | -7.82546000  | 26.03562900 | -7.35226800 L  |
| C-C_R | -6.84756600  | 24.92427800 | -8.90878600 L  |
| H-H_  | -8.94621300  | 28.06027900 | -9.21085900 L  |
| C-C_R | -9.32334600  | 29.51780300 | -7.67815900 L  |
| H-H_  | -11.44494900 | 26.78205600 | -5.97033300 L  |
| C-C_R | -10.74342000 | 28.81072600 | -5.87689200 L  |
| H-H_  | -8.39208500  | 23.58939200 | -11.61186800 L |
| C-C_R | -6.99713800  | 24.22787500 | -10.10334700 L |
| H-H_  | -5.86950500  | 25.00796500 | -8.44691800 L  |
| C-C_R | -9.97484800  | 29.79761400 | -6.48150000 L  |
| H-H_  | -8.72905000  | 30.28285400 | -8.16577800 L  |
| H-H_  | -11.25334900 | 29.01386300 | -4.94199600 L  |
| H-H_  | -6.13819100  | 23.77531500 | -10.58286200 L |
| H-H_  | -9.88680800  | 30.77760300 | -6.02735200 L  |
| C-C_R | -23.72886800 | 14.93363900 | 1.87889200 L   |
| H-H_  | -22.76820900 | 14.48801600 | 2.11357200 L   |
| C-C_R | -26.05495700 | 14.71139900 | 1.32883300 L   |
| H-H_  | -26.91877200 | 14.09182400 | 1.11674400 L   |
| C-C_R | -24.83012900 | 14.12331600 | 1.62186800 L   |
| H-H_  | -24.73248500 | 13.04483700 | 1.64792200 L   |
| C-C_R | -23.84730300 | 16.31395000 | 1.85200400 L   |
| C-C_R | -25.07854000 | 16.90591200 | 1.54933100 L   |
| H-H_  | -22.99195800 | 16.94227400 | 2.06494500 L   |
| N-N_R | -25.20088700 | 18.30894100 | 1.51084200 L   |
| C-C_R | -26.18203900 | 16.09142500 | 1.28464900 L   |
| C-C_R | -24.17565100 | 19.09104600 | 0.95601300 L   |
| C-C_R | -26.35825200 | 18.92850700 | 2.01902800 L   |
| H-H_  | -27.13354800 | 16.54706700 | 1.03805800 L   |
| C-C_R | -23.81895100 | 20.31083600 | 1.54217600 L   |
| C-C_R | -23.48711800 | 18.66213200 | -0.18540900 L  |
| C-C_R | -26.95049200 | 18.46389900 | 3.19875300 L   |
| C-C_R | -26.93275000 | 20.01152000 | 1.34837700 L   |
| H-H_  | -24.31529800 | 20.62909500 | 2.44993600 L   |
| C-C_R | -22.82640900 | 21.09136800 | 0.98365700 L   |
| H-H_  | -23.74992600 | 17.71875000 | -0.64598400 L  |
| C-C_R | -22.48306200 | 19.44248000 | -0.72852000 L  |
| C-C_R | -28.09608500 | 19.07242600 | 3.68730200 L   |
| H-H_  | -26.50291300 | 17.63211800 | 3.72640700 L   |
| H-H_  | -26.48127900 | 20.36622100 | 0.42939400 L   |

|       |              |             |               |
|-------|--------------|-------------|---------------|
| C-C_R | -28.07179700 | 20.61950400 | 1.85123800 L  |
| C-C_R | -22.15167100 | 20.68424100 | -0.17354500 L |
| H-H_  | -22.55011600 | 22.02018400 | 1.46727500 L  |
| H-H_  | -21.93747300 | 19.10200400 | -1.59942000 L |
| H-H_  | -28.54152900 | 18.70566800 | 4.60572600 L  |
| C-C_R | -28.66239900 | 20.15380500 | 3.02206800 L  |
| H-H_  | -28.50522800 | 21.45561900 | 1.31643900 L  |
| C-C_R | -21.05501400 | 21.46935800 | -0.77112900 L |
| H-H_  | -29.55747100 | 20.62565700 | 3.40802700 L  |
| N-N_R | -20.06830900 | 20.74667500 | -1.27964800 L |
| C-C_R | -20.98626000 | 22.89170300 | -0.77961500 L |
| C-C_R | -18.95984200 | 21.36252700 | -1.70376500 L |
| N-N_R | -19.85788800 | 23.50661000 | -1.10653200 L |
| C-C_R | -22.11877000 | 23.79125100 | -0.49309800 L |
| C-C_R | -18.81900000 | 22.78048600 | -1.53284900 L |
| C-C_R | -17.91349500 | 20.61471200 | -2.29557500 L |
| C-C_R | -23.43506000 | 23.48585600 | -0.86233200 L |
| C-C_R | -21.87121100 | 25.03795700 | 0.09440200 L  |
| C-C_R | -17.59105100 | 23.41140600 | -1.84182300 L |
| C-C_R | -16.70803900 | 21.25756400 | -2.66074300 L |
| C-C_R | -18.07470200 | 19.22515200 | -2.52037900 L |
| C-C_R | -24.46715400 | 24.37042300 | -0.62091700 L |
| H-H_  | -23.64597200 | 22.55440400 | -1.37316100 L |
| H-H_  | -20.84983700 | 25.29684500 | 0.34635600 L  |
| C-C_R | -22.89988400 | 25.92158500 | 0.35713400 L  |
| C-C_R | -16.52290000 | 22.65263800 | -2.37555100 L |
| C-C_R | -17.43050800 | 24.80183800 | -1.61612500 L |
| N-N_R | -18.20591500 | 18.08692600 | -2.70506400 L |
| H-H_  | -25.47541300 | 24.13029300 | -0.93391300 L |
| C-C_R | -24.21658200 | 25.59622000 | 0.00815000 L  |
| H-H_  | -22.69359300 | 26.86899200 | 0.83896200 L  |
| N-N_R | -17.29865700 | 25.93929900 | -1.43134000 L |
| N-N_R | -25.27063700 | 26.48430600 | 0.27679100 L  |
| C-C_R | -26.51225500 | 25.98844400 | 0.71676000 L  |
| C-C_R | -25.08386100 | 27.87159500 | 0.11615200 L  |
| C-C_R | -26.56625100 | 24.93554300 | 1.63662400 L  |
| C-C_R | -27.70531400 | 26.54318000 | 0.24401500 L  |
| C-C_R | -25.63072800 | 28.77077000 | 1.03553100 L  |
| C-C_R | -24.34493300 | 28.36265400 | -0.96505400 L |
| H-H_  | -25.64273800 | 24.51099200 | 2.01094700 L  |
| C-C_R | -27.78957900 | 24.44988900 | 2.06791600 L  |
| H-H_  | -27.66793100 | 27.35170100 | -0.47490600 L |
| C-C_R | -28.92432400 | 26.05668900 | 0.69160500 L  |
| H-H_  | -26.19327600 | 28.39241700 | 1.88075700 L  |

|       |              |             |               |
|-------|--------------|-------------|---------------|
| C-C_R | -25.44722700 | 30.13471300 | 0.86726000 L  |
| H-H_  | -23.92566600 | 27.66943900 | -1.68452100 L |
| C-C_R | -24.15628900 | 29.72811700 | -1.11424000 L |
| H-H_  | -27.81307700 | 23.63696500 | 2.78464900 L  |
| C-C_R | -28.97628400 | 25.00689800 | 1.60213200 L  |
| H-H_  | -29.84159900 | 26.49388000 | 0.31407000 L  |
| C-C_R | -24.70690900 | 30.62174900 | -0.20341600 L |
| H-H_  | -25.87376800 | 30.81972300 | 1.59044200 L  |
| H-H_  | -23.58011600 | 30.09332900 | -1.95669400 L |
| H-H_  | -29.93091300 | 24.62952400 | 1.94718700 L  |
| H-H_  | -24.55921800 | 31.68818000 | -0.32649500 L |
| C-C_R | -13.35867200 | 15.37738900 | -8.23974600 L |
| H-H_  | -14.38507100 | 15.25249900 | -8.56662200 L |
| C-C_R | -11.16041800 | 14.48432000 | -7.87071600 L |
| H-H_  | -10.46515400 | 13.65330500 | -7.89314700 L |
| C-C_R | -12.47565300 | 14.30449900 | -8.28764900 L |
| H-H_  | -12.80746300 | 13.33772200 | -8.64586400 L |
| C-C_R | -12.93714400 | 16.61689700 | -7.78784900 L |
| C-C_R | -11.61796800 | 16.79751200 | -7.35983300 L |
| H-H_  | -13.62403800 | 17.45533700 | -7.76197700 L |
| N-N_R | -11.18765800 | 18.05445100 | -6.89047100 L |
| C-C_R | -10.73242100 | 15.71573500 | -7.40168400 L |
| C-C_R | -12.03377100 | 18.83114300 | -6.08131000 L |
| C-C_R | -9.90517400  | 18.52640500 | -7.22217900 L |
| H-H_  | -9.71293800  | 15.84857900 | -7.05974400 L |
| C-C_R | -12.08908200 | 20.21880100 | -6.24620700 L |
| C-C_R | -12.84055800 | 18.23162500 | -5.10788900 L |
| C-C_R | -9.38876000  | 18.33578800 | -8.50737400 L |
| C-C_R | -9.12901200  | 19.19098700 | -6.26764200 L |
| H-H_  | -11.50150000 | 20.68654800 | -7.02696600 L |
| C-C_R | -12.90255800 | 20.98747200 | -5.43634800 L |
| H-H_  | -12.81097900 | 17.15723300 | -4.97536600 L |
| C-C_R | -13.66581100 | 19.00555300 | -4.31298500 L |
| C-C_R | -8.11999200  | 18.79562700 | -8.82404500 L |
| H-H_  | -9.99028300  | 17.82955200 | -9.25211400 L |
| H-H_  | -9.52177300  | 19.33261000 | -5.26877900 L |
| C-C_R | -7.86631100  | 19.65718400 | -6.59722700 L |
| C-C_R | -13.69275100 | 20.39944200 | -4.44059700 L |
| H-H_  | -12.94934600 | 22.05696900 | -5.59695800 L |
| H-H_  | -14.30359600 | 18.54051900 | -3.57204200 L |
| H-H_  | -7.73384600  | 18.64299400 | -9.82491100 L |
| C-C_R | -7.35076500  | 19.46042200 | -7.87373400 L |
| H-H_  | -7.27550800  | 20.16604500 | -5.84399100 L |
| C-C_R | -14.60794700 | 21.18279500 | -3.58966200 L |

|       |              |             |               |
|-------|--------------|-------------|---------------|
| H-H_  | -6.36073000  | 19.81765300 | -8.12717200 L |
| N-N_R | -15.74944200 | 20.57501800 | -3.29503900 L |
| C-C_R | -14.35910200 | 22.50901600 | -3.13444000 L |
| N-N_R | -15.33416800 | 23.22501800 | -2.59069500 L |
| C-C_R | -13.04595200 | 23.17751600 | -3.16557000 L |
| C-C_R | -11.84511800 | 22.48775500 | -2.95778600 L |
| C-C_R | -12.98969800 | 24.56722600 | -3.32580400 L |
| C-C_R | -10.63393200 | 23.15228400 | -2.94885600 L |
| H-H_  | -11.86352600 | 21.42207900 | -2.77210100 L |
| H-H_  | -13.91760100 | 25.11231800 | -3.44760500 L |
| C-C_R | -11.78017700 | 25.23698000 | -3.33659500 L |
| H-H_  | -9.71613700  | 22.60704400 | -2.76290900 L |
| C-C_R | -10.58303300 | 24.53554800 | -3.15481500 L |
| H-H_  | -11.75451400 | 26.30887600 | -3.49056800 L |
| N-N_R | -9.34919100  | 25.20538800 | -3.17002000 L |
| C-C_R | -8.23404900  | 24.60964500 | -3.78850400 L |
| C-C_R | -9.22943900  | 26.47830300 | -2.57756400 L |
| C-C_R | -8.38123900  | 23.91289400 | -4.99101500 L |
| C-C_R | -6.96455300  | 24.70947700 | -3.20919600 L |
| C-C_R | -8.46259900  | 27.47460800 | -3.18926800 L |
| C-C_R | -9.87838200  | 26.75892800 | -1.37086600 L |
| H-H_  | -9.36266500  | 23.84164900 | -5.44626000 L |
| C-C_R | -7.28204400  | 23.32642400 | -5.59682300 L |
| H-H_  | -6.84788600  | 25.24048100 | -2.27234300 L |
| C-C_R | -5.86935400  | 24.12836500 | -3.82876300 L |
| H-H_  | -7.96800100  | 27.26436600 | -4.13083600 L |
| C-C_R | -8.34577200  | 28.72265400 | -2.59823500 L |
| H-H_  | -10.46737500 | 25.98690700 | -0.89040900 L |
| C-C_R | -9.76584500  | 28.01557700 | -0.79696700 L |
| H-H_  | -7.41451000  | 22.79424400 | -6.53194300 L |
| C-C_R | -6.01892600  | 23.43196300 | -5.02332400 L |
| H-H_  | -4.89129200  | 24.21205200 | -3.36689500 L |
| C-C_R | -8.99724800  | 29.00235800 | -1.40257000 L |
| H-H_  | -7.75147500  | 29.48770500 | -3.08585400 L |
| H-H_  | -10.27574800 | 28.21860700 | 0.13693400 L  |
| H-H_  | -5.15995400  | 22.97929500 | -5.50383200 L |
| H-H_  | -8.90923300  | 29.98245500 | -0.94742700 L |
| C-C_R | -22.75129400 | 14.13849100 | 6.95881700 L  |
| H-H_  | -21.79063400 | 13.69286800 | 7.19349700 L  |
| C-C_R | -25.07738300 | 13.91625000 | 6.40875700 L  |
| H-H_  | -25.94119700 | 13.29667600 | 6.19666900 L  |
| C-C_R | -23.85255500 | 13.32816700 | 6.70179200 L  |
| H-H_  | -23.75491100 | 12.24968900 | 6.72784700 L  |
| C-C_R | -22.86972800 | 15.51880200 | 6.93192900 L  |

|       |              |             |              |
|-------|--------------|-------------|--------------|
| C-C_R | -24.10096500 | 16.11076400 | 6.62925600 L |
| H-H_  | -22.01374600 | 16.14636100 | 7.14496800 L |
| N-N_R | -24.22331300 | 17.51379300 | 6.59076700 L |
| C-C_R | -25.20446500 | 15.29627600 | 6.36457300 L |
| C-C_R | -23.19805100 | 18.29579100 | 6.03494400 L |
| C-C_R | -25.38004000 | 18.13259400 | 7.09905100 L |
| H-H_  | -26.15597300 | 15.75191900 | 6.11798300 L |
| C-C_R | -22.84137600 | 19.51568700 | 6.62210100 L |
| C-C_R | -22.50954300 | 17.86698400 | 4.89451600 L |
| C-C_R | -25.97291700 | 17.66875000 | 8.27867800 L |
| C-C_R | -25.95514900 | 19.21626400 | 6.42730800 L |
| H-H_  | -23.33708600 | 19.83318300 | 7.52995900 L |
| C-C_R | -21.84883400 | 20.29621900 | 6.06358100 L |
| H-H_  | -22.77171400 | 16.92283700 | 4.43403900 L |
| C-C_R | -21.50485000 | 18.64656700 | 4.35150300 L |
| C-C_R | -27.11851100 | 18.27727800 | 8.76722600 L |
| H-H_  | -25.52470000 | 16.83620500 | 8.80643000 L |
| H-H_  | -25.50370500 | 19.57107200 | 5.50931800 L |
| C-C_R | -27.09358500 | 19.82359100 | 6.93126100 L |
| C-C_R | -21.17345900 | 19.88832800 | 4.90647800 L |
| H-H_  | -21.57190400 | 21.22427200 | 6.54729800 L |
| H-H_  | -20.95989800 | 18.30685600 | 3.48050500 L |
| H-H_  | -27.56392900 | 17.91041300 | 9.68465600 L |
| C-C_R | -27.68482400 | 19.35865600 | 8.10199300 L |
| H-H_  | -27.52762800 | 20.66036300 | 6.39537000 L |
| C-C_R | -20.07743900 | 20.67421000 | 4.30879500 L |
| H-H_  | -28.57989600 | 19.83050900 | 8.48795100 L |
| N-N_R | -19.09009700 | 19.95076200 | 3.80037500 L |
| C-C_R | -20.00868500 | 22.09655500 | 4.30031000 L |
| C-C_R | -17.98163000 | 20.56661400 | 3.37625800 L |
| N-N_R | -18.87967600 | 22.71069800 | 3.97349100 L |
| C-C_R | -21.14116900 | 22.99599600 | 4.58583300 L |
| C-C_R | -17.84142600 | 21.98533800 | 3.54707600 L |
| C-C_R | -16.93592100 | 19.81956400 | 2.78434900 L |
| C-C_R | -22.45748500 | 22.69070800 | 4.21759300 L |
| C-C_R | -20.89299800 | 24.24204400 | 5.17442500 L |
| C-C_R | -16.61347600 | 22.61625800 | 3.23810100 L |
| C-C_R | -15.72982700 | 20.46165200 | 2.41928000 L |
| C-C_R | -17.09649000 | 18.42923900 | 2.55964400 L |
| C-C_R | -23.48957900 | 23.57527500 | 4.45900800 L |
| H-H_  | -22.66839700 | 21.75925600 | 3.70676400 L |
| H-H_  | -19.87226200 | 24.50169700 | 5.42628100 L |
| C-C_R | -21.92231000 | 25.12643700 | 5.43705800 L |
| C-C_R | -15.54532500 | 21.85748900 | 2.70437400 L |



|       |              |             |               |
|-------|--------------|-------------|---------------|
| C-C_R | -16.45229600 | 24.00592500 | 3.46389800 L  |
| N-N_R | -17.22834000 | 17.29177800 | 2.37486000 L  |
| H-H_  | -24.49720100 | 23.33438000 | 4.14611000 L  |
| C-C_R | -23.23837000 | 24.80030800 | 5.08817300 L  |
| H-H_  | -21.71538100 | 26.07308000 | 5.91898500 L  |
| N-N_R | -16.32108200 | 25.14415100 | 3.64858400 L  |
| N-N_R | -24.29306300 | 25.68915700 | 5.35671600 L  |
| C-C_R | -25.53468000 | 25.19329600 | 5.79668400 L  |
| C-C_R | -24.10626000 | 27.07633900 | 5.19508300 L  |
| C-C_R | -25.58867600 | 24.14039500 | 6.71654900 L  |
| C-C_R | -26.72773900 | 25.74803100 | 5.32393900 L  |
| C-C_R | -24.65312700 | 27.97551400 | 6.11446200 L  |
| C-C_R | -23.36733300 | 27.56739800 | 4.11387700 L  |
| H-H_  | -24.66452600 | 23.71507900 | 7.09097000 L  |
| C-C_R | -26.81136700 | 23.65397700 | 7.14793900 L  |
| H-H_  | -26.69035600 | 26.55655200 | 4.60501800 L  |
| C-C_R | -27.94675000 | 25.26154000 | 5.77152900 L  |
| H-H_  | -25.21570100 | 27.59726800 | 6.96068100 L  |
| C-C_R | -24.46965200 | 29.33956400 | 5.94718400 L  |
| H-H_  | -22.94745400 | 26.87352700 | 3.39550200 L  |
| C-C_R | -23.17807700 | 28.93220400 | 3.96578300 L  |
| H-H_  | -26.83486500 | 22.84105200 | 7.86467200 L  |
| C-C_R | -27.99807200 | 24.21098500 | 6.68215500 L  |
| H-H_  | -28.86402400 | 25.69873100 | 5.39399400 L  |
| C-C_R | -23.72869700 | 29.82583600 | 4.87660700 L  |
| H-H_  | -24.89619400 | 30.02457500 | 6.67036600 L  |
| H-H_  | -22.60254100 | 29.29818000 | 3.12323000 L  |
| H-H_  | -28.95333800 | 23.83437500 | 7.02711100 L  |
| H-H_  | -23.58164400 | 30.89303200 | 4.75343000 L  |
| C-C_R | -12.38046000 | 14.58147600 | -3.15972300 L |
| H-H_  | -13.40749600 | 14.45735000 | -3.48669700 L |
| C-C_R | -10.18284300 | 13.68917200 | -2.79079100 L |
| H-H_  | -9.48758000  | 12.85815700 | -2.81322300 L |
| C-C_R | -11.49807800 | 13.50935000 | -3.20772400 L |
| H-H_  | -11.82988800 | 12.54257300 | -3.56594000 L |
| C-C_R | -11.95956900 | 15.82174900 | -2.70792500 L |
| C-C_R | -10.63973000 | 16.00149200 | -2.28080400 L |
| H-H_  | -12.64646400 | 16.66018900 | -2.68205300 L |
| N-N_R | -10.20944600 | 17.25853800 | -1.81044800 L |
| C-C_R | -9.75484700  | 14.92058600 | -2.32175900 L |
| C-C_R | -11.05555900 | 18.03523000 | -1.00128700 L |
| C-C_R | -8.92696200  | 17.73049300 | -2.14215600 L |
| H-H_  | -8.73533700  | 15.05332300 | -1.98081400 L |
| C-C_R | -11.11150800 | 19.42365200 | -1.16628300 L |

|       |              |             |               |
|-------|--------------|-------------|---------------|
| C-C_R | -11.86298300 | 17.43647600 | -0.02796500 L |
| C-C_R | -8.41118500  | 17.54064000 | -3.42745000 L |
| C-C_R | -8.15143700  | 18.39583800 | -1.18771700 L |
| H-H_  | -10.52392500 | 19.89140000 | -1.94704100 L |
| C-C_R | -11.92434600 | 20.19155900 | -0.35632500 L |
| H-H_  | -11.83340400 | 16.36208500 | 0.10455800 L  |
| C-C_R | -12.68823700 | 18.21040400 | 0.76694000 L  |
| C-C_R | -7.14178000  | 17.99971500 | -3.74402200 L |
| H-H_  | -9.01268200  | 17.03429600 | -4.17318300 L |
| H-H_  | -8.54419800  | 18.53746200 | -0.18885500 L |
| C-C_R | -6.88809800  | 18.86127100 | -1.51720400 L |
| C-C_R | -12.71517600 | 19.60429400 | 0.63932800 L  |
| H-H_  | -11.97113400 | 21.26105700 | -0.51693500 L |
| H-H_  | -13.32602200 | 17.74537000 | 1.50788200 L  |
| H-H_  | -6.75627200  | 17.84784500 | -4.74498700 L |
| C-C_R | -6.37319000  | 18.66527300 | -2.79381000 L |
| H-H_  | -6.29793300  | 19.37089700 | -0.76406600 L |
| C-C_R | -13.62973500 | 20.38688200 | 1.49036200 L  |
| H-H_  | -5.38315500  | 19.02250500 | -3.04724800 L |
| N-N_R | -14.77120500 | 19.77899900 | 1.78399000 L  |
| C-C_R | -13.38152700 | 21.71386800 | 1.94548400 L  |
| N-N_R | -14.35659400 | 22.42987000 | 2.48923000 L  |
| C-C_R | -12.06837800 | 22.38236800 | 1.91435400 L  |
| C-C_R | -10.86754300 | 21.69260600 | 2.12213800 L  |
| C-C_R | -12.01212300 | 23.77207800 | 1.75412000 L  |
| C-C_R | -9.65635700  | 22.35713600 | 2.13106900 L  |
| H-H_  | -10.88595200 | 20.62693000 | 2.30782300 L  |
| H-H_  | -12.94002600 | 24.31717000 | 1.63231900 L  |
| C-C_R | -10.80260200 | 24.44183200 | 1.74332900 L  |
| H-H_  | -8.73853700  | 21.81178800 | 2.31602200 L  |
| C-C_R | -9.60482100  | 23.73963600 | 1.92520800 L  |
| H-H_  | -10.77627600 | 25.51285600 | 1.58846100 L  |
| N-N_R | -8.37161700  | 24.41024000 | 1.90990400 L  |
| C-C_R | -7.25647500  | 23.81449700 | 1.29142000 L  |
| C-C_R | -8.25186400  | 25.68315500 | 2.50236000 L  |
| C-C_R | -7.40366400  | 23.11774600 | 0.08890900 L  |
| C-C_R | -5.98697800  | 23.91432800 | 1.87072800 L  |
| C-C_R | -7.48502500  | 26.67945900 | 1.89065700 L  |
| C-C_R | -8.90078100  | 25.96367300 | 3.70806400 L  |
| H-H_  | -8.38445300  | 23.04573700 | -0.36623700 L |
| C-C_R | -6.30383200  | 22.53051100 | -0.51680000 L |
| H-H_  | -5.86967400  | 24.44456800 | 2.80768000 L  |
| C-C_R | -4.89178000  | 23.33321700 | 1.25116200 L  |
| H-H_  | -6.99042600  | 26.46921800 | 0.94908900 L  |

|       |             |             |               |
|-------|-------------|-------------|---------------|
| C-C_R | -7.36819700 | 27.92750600 | 2.48169000 L  |
| H-H_  | -9.48916300 | 25.19099500 | 4.18961400 L  |
| C-C_R | -8.78763300 | 27.21966500 | 4.28305600 L  |
| H-H_  | -6.43693600 | 21.99909600 | -1.45201900 L |
| C-C_R | -5.04135100 | 22.63681400 | 0.05660000 L  |
| H-H_  | -3.91371800 | 23.41690400 | 1.71302900 L  |
| C-C_R | -8.01967300 | 28.20721000 | 3.67735500 L  |
| H-H_  | -6.77326300 | 28.69179300 | 1.99416900 L  |
| H-H_  | -9.29753600 | 27.42269500 | 5.21695700 L  |
| H-H_  | -4.18237900 | 22.18414700 | -0.42390800 L |
| H-H_  | -7.93102100 | 29.18654200 | 4.13259600 L  |

Cartesian coordinates of S<sub>0</sub> state of optimized CNQ-b-TPA in toluene:

|   |             |             |            |
|---|-------------|-------------|------------|
| C | 6.66155400  | 5.38652700  | 5.36195200 |
| H | 5.71721300  | 5.31667800  | 5.88973700 |
| C | 8.62706300  | 6.62216400  | 4.75284500 |
| H | 9.22127000  | 7.52814000  | 4.79202000 |
| C | 7.41399200  | 6.55364800  | 5.42811300 |
| H | 7.05831700  | 7.40171700  | 6.00130700 |
| C | 7.11736900  | 4.29497300  | 4.63699300 |
| C | 8.32967300  | 4.36794800  | 3.94827500 |
| H | 6.53624700  | 3.38110200  | 4.59973600 |
| N | 8.79951100  | 3.25919900  | 3.20664300 |
| C | 9.08176400  | 5.54211800  | 4.00977200 |
| C | 7.93718400  | 2.54110500  | 2.37582800 |
| C | 10.16762800 | 2.91063500  | 3.28833000 |
| H | 10.02172200 | 5.60150600  | 3.47405100 |
| C | 8.11502400  | 1.16446400  | 2.18238700 |
| C | 6.87340800  | 3.17501200  | 1.71945700 |
| C | 10.80501000 | 2.85422600  | 4.52880900 |
| C | 10.89895000 | 2.64004700  | 2.13048900 |
| H | 8.90948100  | 0.65041200  | 2.70871900 |
| C | 7.27988900  | 0.45659900  | 1.34033100 |
| H | 6.71800100  | 4.23806100  | 1.85380600 |
| C | 6.02858200  | 2.45543300  | 0.89834100 |
| C | 12.15364400 | 2.53718600  | 4.60521000 |
| H | 10.23740600 | 3.06297800  | 5.42791300 |
| H | 10.40900800 | 2.69394700  | 1.16546700 |
| C | 12.24412300 | 2.31051000  | 2.21671200 |
| C | 6.22492900  | 1.08832700  | 0.67176900 |
| H | 7.43362500  | -0.60932400 | 1.22848300 |
| H | 5.20451100  | 2.95502900  | 0.40405900 |
| H | 12.63644100 | 2.49699300  | 5.57505800 |

|   |             |             |             |
|---|-------------|-------------|-------------|
| C | 12.87982300 | 2.26006300  | 3.45231100  |
| H | 12.79953300 | 2.10868500  | 1.30763700  |
| C | 5.26763000  | 0.35798400  | -0.17209500 |
| H | 13.93270400 | 2.01127400  | 3.51644500  |
| N | 4.02718300  | 0.78745900  | -0.12610700 |
| C | 5.60850900  | -0.79455700 | -0.99408100 |
| C | 3.06677000  | 0.08214700  | -0.74983200 |
| N | 4.65508600  | -1.53135000 | -1.51853200 |
| C | 6.98141300  | -1.19824400 | -1.32884900 |
| C | 3.37725500  | -1.13949600 | -1.38050700 |
| C | 1.72325900  | 0.53755900  | -0.71672100 |
| C | 8.01276200  | -0.27507200 | -1.53734600 |
| C | 7.26088300  | -2.55366500 | -1.53910200 |
| C | 2.32421400  | -1.91980200 | -1.92108700 |
| C | 0.70279400  | -0.23143300 | -1.26895400 |
| C | 1.45044000  | 1.77794500  | -0.06323300 |
| C | 9.27385300  | -0.68980600 | -1.91772400 |
| H | 7.82240700  | 0.78557500  | -1.43194400 |
| H | 6.46878100  | -3.27912400 | -1.40012600 |
| C | 8.52493500  | -2.97843900 | -1.89597100 |
| C | 1.02149100  | -1.46973600 | -1.85753800 |
| C | 2.62391800  | -3.16426500 | -2.55401400 |
| N | 1.21882100  | 2.78342300  | 0.46032500  |
| H | 10.04998900 | 0.04363800  | -2.09680300 |
| C | 9.55874800  | -2.05162200 | -2.08808400 |
| H | 8.72286100  | -4.03551200 | -2.02107400 |
| H | 0.23112400  | -2.06888400 | -2.29021300 |
| N | 2.83784800  | -4.17522400 | -3.07365500 |
| N | 10.84251500 | -2.46924200 | -2.44293000 |
| C | 11.97717600 | -1.76793800 | -1.97251500 |
| C | 11.03306400 | -3.62268400 | -3.23888000 |
| C | 12.06471100 | -1.38072100 | -0.63426800 |
| C | 13.03066100 | -1.47510200 | -2.83994800 |
| C | 12.02089000 | -4.55076300 | -2.90588000 |
| C | 10.24661500 | -3.83715400 | -4.37233900 |
| H | 11.25295100 | -1.61695200 | 0.04357000  |
| C | 13.18611800 | -0.70363500 | -0.17653900 |
| H | 12.96253900 | -1.77480500 | -3.87903500 |
| C | 14.15443500 | -0.80983600 | -2.37108500 |
| H | 12.63053800 | -4.38721500 | -2.02519000 |
| C | 12.21876300 | -5.67192100 | -3.69910800 |
| H | 9.48597900  | -3.11294200 | -4.63921300 |
| C | 10.43901100 | -4.97060200 | -5.14896700 |
| H | 13.24114100 | -0.41439300 | 0.86695700  |

|   |              |             |             |
|---|--------------|-------------|-------------|
| C | 14.23773800  | -0.41707700 | -1.03988900 |
| H | 14.96575400  | -0.58872200 | -3.05532300 |
| C | 11.42738300  | -5.89149500 | -4.82057200 |
| H | 12.98957800  | -6.38484100 | -3.42897300 |
| H | 9.81955200   | -5.12571800 | -6.02499900 |
| H | 15.11650400  | 0.10392600  | -0.67808400 |
| H | 11.57968100  | -6.77191800 | -5.43370300 |
| C | -10.43881500 | 4.97102300  | -5.14890200 |
| H | -9.81931500  | 5.12620700  | -6.02489400 |
| C | -12.21863500 | 5.67222600  | -3.69907300 |
| H | -12.98946500 | 6.38512300  | -3.42891900 |
| C | -11.42720500 | 5.89188800  | -4.82048300 |
| H | -11.57947600 | 6.77235700  | -5.43355300 |
| C | -10.24645200 | 3.83751600  | -4.37235200 |
| C | -11.03295300 | 3.62295700  | -3.23894600 |
| H | -9.48580200  | 3.11332600  | -4.63924600 |
| N | -10.84243700 | 2.46945400  | -2.44307600 |
| C | -12.02079700 | 4.55100700  | -2.90592100 |
| C | -9.55868500  | 2.05180700  | -2.08820800 |
| C | -11.97711800 | 1.76810800  | -1.97277100 |
| H | -12.63048500 | 4.38739100  | -2.02527100 |
| C | -9.27379300  | 0.68997800  | -1.91795200 |
| C | -8.52488300  | 2.97861200  | -1.89597400 |
| C | -13.03056200 | 1.47533900  | -2.84027600 |
| C | -12.06471400 | 1.38078200  | -0.63455900 |
| H | -10.04991900 | -0.04345300 | -2.09712600 |
| C | -8.01271400  | 0.27521600  | -1.53756100 |
| H | -8.72280700  | 4.03569500  | -2.02099500 |
| C | -7.26084400  | 2.55381200  | -1.53909100 |
| C | -14.15435500 | 0.81003100  | -2.37152000 |
| H | -12.96239200 | 1.77512600  | -3.87933600 |
| H | -11.25298500 | 1.61696000  | 0.04333600  |
| C | -13.18614000 | 0.70365600  | -0.17693800 |
| C | -6.98137700  | 1.19837400  | -1.32894400 |
| H | -7.82235900  | -0.78544000 | -1.43224300 |
| H | -6.46875000  | 3.27926200  | -1.40002000 |
| H | -14.96564200 | 0.58897000  | -3.05581300 |
| C | -14.23771900 | 0.41716400  | -1.04035900 |
| H | -13.24121100 | 0.41432900  | 0.86653300  |
| C | -5.60848300  | 0.79466300  | -0.99416400 |
| H | -15.11650000 | -0.10387100 | -0.67863700 |
| N | -4.65504500  | 1.53150500  | -1.51852000 |
| C | -5.26762700  | -0.35795200 | -0.17227100 |
| C | -3.37721800  | 1.13963700  | -1.38049400 |

|   |              |             |             |
|---|--------------|-------------|-------------|
| N | -4.02718200  | -0.78743200 | -0.12629000 |
| C | -6.22495000  | -1.08837500 | 0.67149800  |
| C | -3.06675200  | -0.08206400 | -0.74992400 |
| C | -2.32416000  | 1.91999500  | -1.92096900 |
| C | -7.27992800  | -0.45671000 | 1.34009100  |
| C | -6.02860800  | -2.45550200 | 0.89794500  |
| C | -1.72324200  | -0.53748100 | -0.71681900 |
| C | -1.02144000  | 1.46992200  | -1.85742500 |
| C | -2.62384500  | 3.16452200  | -2.55378000 |
| C | -8.11508700  | -1.16465400 | 2.18205500  |
| H | -7.43366000  | 0.60922400  | 1.22834000  |
| H | -5.20452300  | -2.95505000 | 0.40364000  |
| C | -6.87345800  | -3.17516000 | 1.71896800  |
| C | -0.70276100  | 0.23156200  | -1.26895200 |
| C | -1.45044200  | -1.77792400 | -0.06343200 |
| H | -0.23105900  | 2.06911200  | -2.29001800 |
| N | -2.83776400  | 4.17552200  | -3.07334500 |
| H | -8.90955900  | -0.65065300 | 2.70841300  |
| C | -7.93725400  | -2.54131500 | 2.37536900  |
| H | -6.71805600  | -4.23822100 | 1.85321900  |
| N | -1.21884600  | -2.78346500 | 0.46001600  |
| N | -8.79960800  | -3.25948800 | 3.20608800  |
| C | -10.16772600 | -2.91092900 | 3.28776500  |
| C | -8.32979500  | -4.36831100 | 3.94762500  |
| C | -10.89901000 | -2.64022300 | 2.12992700  |
| C | -10.80514800 | -2.85464100 | 4.52822900  |
| C | -9.08189200  | -5.54248500 | 4.00898400  |
| C | -7.11751200  | -4.29540700 | 4.63638800  |
| H | -10.40903700 | -2.69402800 | 1.16491600  |
| C | -12.24418500 | -2.31068900 | 2.21614000  |
| H | -10.23757400 | -3.06348500 | 5.42733100  |
| C | -12.15378300 | -2.53760400 | 4.60461900  |
| H | -10.02183400 | -5.60181700 | 3.47322800  |
| C | -8.62721800  | -6.62260400 | 4.75196600  |
| H | -6.53638700  | -3.38153500 | 4.59923800  |
| C | -6.66172400  | -5.38703300 | 5.36125500  |
| H | -12.79956400 | -2.10877000 | 1.30706800  |
| C | -12.87992400 | -2.26036300 | 3.45172400  |
| H | -12.63661100 | -2.49750700 | 5.57445500  |
| C | -7.41416800  | -6.55415800 | 5.42727800  |
| H | -9.22142900  | -7.52858300 | 4.79103400  |
| H | -5.71739900  | -5.31723800 | 5.88907700  |
| H | -13.93280600 | -2.01157600 | 3.51584800  |
| H | -7.05851400  | -7.40228400 | 6.00040100  |

Cartesian coordinates of S<sub>0</sub> state of optimized CNQ-b-TPA in crystal:

|       |              |              |               |
|-------|--------------|--------------|---------------|
| C-C_R | -19.11417500 | -23.62419000 | -4.50989700 L |
| H-H_  | -18.16667400 | -24.14605500 | -4.56643900 L |
| C-C_R | -21.17296500 | -22.91013300 | -5.52939800 L |
| H-H_  | -21.82561100 | -22.85586800 | -6.39228900 L |
| C-C_R | -19.95438500 | -23.57633900 | -5.61755000 L |
| H-H_  | -19.65926500 | -24.05217000 | -6.54486800 L |
| C-C_R | -19.48410300 | -23.01896700 | -3.32051900 L |
| C-C_R | -20.70799500 | -22.34388500 | -3.23242800 L |
| H-H_  | -18.83856500 | -23.06990700 | -2.45322100 L |
| N-N_R | -21.08258200 | -21.71884200 | -2.03193800 L |
| C-C_R | -21.55136800 | -22.29213400 | -4.34971400 L |
| C-C_R | -20.11879100 | -21.05736400 | -1.25635800 L |
| C-C_R | -22.42130900 | -21.74523400 | -1.60700100 L |
| H-H_  | -22.48943100 | -21.75343000 | -4.28748000 L |
| C-C_R | -20.14859500 | -21.15480300 | 0.14020800 L  |
| C-C_R | -19.10998900 | -20.30361200 | -1.87093300 L |
| C-C_R | -23.19629700 | -22.89847100 | -1.78284300 L |
| C-C_R | -22.98906000 | -20.61783900 | -1.00312500 L |
| H-H_  | -20.89921700 | -21.77585900 | 0.61699200 L  |
| C-C_R | -19.20691800 | -20.49156100 | 0.90102900 L  |
| H-H_  | -19.08170700 | -20.22374100 | -2.95062100 L |
| C-C_R | -18.16783400 | -19.65342400 | -1.10039700 L |
| C-C_R | -24.51746100 | -22.91248600 | -1.36478800 L |
| H-H_  | -22.75180200 | -23.77748200 | -2.23176400 L |
| H-H_  | -22.39341500 | -19.72176900 | -0.88070300 L |
| C-C_R | -24.30970500 | -20.64686800 | -0.58560900 L |
| C-C_R | -18.21294700 | -19.71326300 | 0.29711000 L  |
| H-H_  | -19.22534500 | -20.59607700 | 1.97912900 L  |
| H-H_  | -17.37333100 | -19.08513500 | -1.56779600 L |
| H-H_  | -25.10596800 | -23.81325700 | -1.49779000 L |
| C-C_R | -25.08003600 | -21.79047400 | -0.76551800 L |
| H-H_  | -24.73924300 | -19.76547900 | -0.12548000 L |
| C-C_R | -17.15972900 | -19.03278700 | 1.08412900 L  |
| H-H_  | -26.11312500 | -21.80907500 | -0.44123100 L |
| N-N_R | -15.95791100 | -19.07976300 | 0.52485300 L  |
| C-C_R | -17.35729000 | -18.42926300 | 2.34764100 L  |
| C-C_R | -14.90567800 | -18.63762700 | 1.22307000 L  |
| N-N_R | -16.30207400 | -18.07026200 | 3.08254100 L  |
| C-C_R | -18.67047600 | -18.11153300 | 2.93642300 L  |
| C-C_R | -15.08749900 | -18.19337400 | 2.56362000 L  |
| C-C_R | -13.60581700 | -18.65695100 | 0.64289300 L  |

|       |              |              |               |
|-------|--------------|--------------|---------------|
| C-C_R | -19.75959800 | -17.69798300 | 2.16042300 L  |
| C-C_R | -18.82655000 | -18.14622500 | 4.32615500 L  |
| C-C_R | -13.92967400 | -17.84743900 | 3.33272100 L  |
| C-C_R | -12.48262000 | -18.26520300 | 1.40485300 L  |
| C-C_R | -13.48929800 | -19.15020400 | -0.68317600 L |
| C-C_R | -20.96995200 | -17.37408300 | 2.74315900 L  |
| H-H_  | -19.64798400 | -17.59682200 | 1.08742200 L  |
| H-H_  | -17.97665600 | -18.42622300 | 4.93642700 L  |
| C-C_R | -20.03546600 | -17.83424700 | 4.91771000 L  |
| C-C_R | -12.67967500 | -17.90054900 | 2.75140000 L  |
| C-C_R | -14.08806100 | -17.41493200 | 4.67794900 L  |
| N-N_R | -13.40524200 | -19.55375900 | -1.76761200 L |
| H-H_  | -21.79699000 | -17.03186000 | 2.13209400 L  |
| C-C_R | -21.12853400 | -17.45196900 | 4.13148700 L  |
| H-H_  | -20.14569500 | -17.88847700 | 5.99451500 L  |
| H-H_  | -11.82281700 | -17.60387400 | 3.34141900 L  |
| N-N_R | -14.20245200 | -17.05896000 | 5.77478100 L  |
| N-N_R | -22.36171500 | -17.13276800 | 4.72293200 L  |
| C-C_R | -23.55814800 | -17.56385000 | 4.12326600 L  |
| C-C_R | -22.39833000 | -16.38597700 | 5.91870900 L  |
| C-C_R | -23.64247400 | -18.84150400 | 3.55934500 L  |
| C-C_R | -24.67887900 | -16.72842500 | 4.08542500 L  |
| C-C_R | -23.32029300 | -16.69882700 | 6.92080400 L  |
| C-C_R | -21.50590600 | -15.32828800 | 6.11415800 L  |
| H-H_  | -22.78113700 | -19.49685200 | 3.59821100 L  |
| C-C_R | -24.82305900 | -19.26708800 | 2.97019700 L  |
| H-H_  | -24.61408700 | -15.73512200 | 4.51270900 L  |
| C-C_R | -25.85601800 | -17.16644800 | 3.50100900 L  |
| H-H_  | -24.00334700 | -17.52847500 | 6.77861100 L  |
| C-C_R | -23.34971400 | -15.95938600 | 8.09266000 L  |
| H-H_  | -20.79526100 | -15.07884500 | 5.33508500 L  |
| C-C_R | -21.53577900 | -14.60392400 | 7.29552700 L  |
| H-H_  | -24.87463800 | -20.26572800 | 2.55032300 L  |
| C-C_R | -25.93757900 | -18.43714000 | 2.93879100 L  |
| H-H_  | -26.71550800 | -16.50550100 | 3.47678000 L  |
| C-C_R | -22.45796900 | -14.91088300 | 8.28918100 L  |
| H-H_  | -24.06616000 | -16.21528000 | 8.86407100 L  |
| H-H_  | -20.83627500 | -13.78733200 | 7.43326000 L  |
| H-H_  | -26.86165600 | -18.77546100 | 2.48666500 L  |
| H-H_  | -22.47921600 | -14.34051200 | 9.21040300 L  |
| C-C_R | -2.42135500  | -12.86450900 | -4.29663700 L |
| H-H_  | -3.17485600  | -12.08521600 | -4.31139500 L |
| C-C_R | -0.51936300  | -13.94806900 | -5.28141000 L |
| H-H_  | 0.21271200   | -14.02929000 | -6.07546800 L |



|       |              |              |               |
|-------|--------------|--------------|---------------|
| C-C_R | -1.48279800  | -12.94530000 | -5.31914700 L |
| H-H_  | -1.50163700  | -12.23606000 | -6.13789000 L |
| C-C_R | -2.39721800  | -13.76568400 | -3.24329900 L |
| C-C_R | -1.43642400  | -14.77918600 | -3.20966400 L |
| H-H_  | -3.12301400  | -13.69192900 | -2.44301000 L |
| N-N_R | -1.41344600  | -15.70373200 | -2.14464400 L |
| C-C_R | -0.49771200  | -14.86512500 | -4.24074500 L |
| C-C_R | -2.61469100  | -16.22569600 | -1.63775300 L |
| C-C_R | -0.18074600  | -16.12130300 | -1.60419100 L |
| H-H_  | 0.24317000   | -15.65532000 | -4.22200100 L |
| C-C_R | -2.76741900  | -16.44471900 | -0.26395200 L |
| C-C_R | -3.68007700  | -16.53165100 | -2.49079200 L |
| C-C_R | 0.85054800   | -15.20080800 | -1.39756700 L |
| C-C_R | 0.02876800   | -17.46265900 | -1.27477200 L |
| H-H_  | -1.96337300  | -16.17659300 | 0.40992200 L  |
| C-C_R | -3.93910400  | -16.98296000 | 0.23504900 L  |
| H-H_  | -3.57881100  | -16.36227200 | -3.55571800 L |
| C-C_R | -4.85649600  | -17.04798300 | -1.98146900 L |
| C-C_R | 2.06622900   | -15.61980600 | -0.87826400 L |
| H-H_  | 0.68965700   | -14.15877400 | -1.64643800 L |
| H-H_  | -0.76423600  | -18.18205300 | -1.44013700 L |
| C-C_R | 1.24410200   | -17.87074800 | -0.74429500 L |
| C-C_R | -5.00173500  | -17.31033700 | -0.61417500 L |
| H-H_  | -4.03832900  | -17.12439900 | 1.30283100 L  |
| H-H_  | -5.68522800  | -17.26691800 | -2.64310000 L |
| H-H_  | 2.85496800   | -14.89356400 | -0.72222300 L |
| C-C_R | 2.27049100   | -16.95368800 | -0.54502900 L |
| H-H_  | 1.39009800   | -18.91618200 | -0.49668400 L |
| C-C_R | -6.28500300  | -17.83353600 | -0.11292500 L |
| H-H_  | 3.22137200   | -17.27660900 | -0.13884600 L |
| N-N_R | -7.35813000  | -17.40943400 | -0.76127900 L |
| C-C_R | -6.42973300  | -18.70681900 | 1.01370700 L  |
| C-C_R | -8.56507500  | -17.71148200 | -0.28203700 L |
| N-N_R | -7.61929600  | -18.92943700 | 1.53818900 L  |
| C-C_R | -5.31967700  | -19.44690700 | 1.64647400 L  |
| C-C_R | -8.70441500  | -18.41528700 | 0.93936800 L  |
| C-C_R | -9.74424000  | -17.29114900 | -0.96830900 L |
| C-C_R | -4.25379000  | -19.97411100 | 0.90906900 L  |
| C-C_R | -5.36784100  | -19.70939200 | 3.01816800 L  |
| C-C_R | -9.99427900  | -18.62804400 | 1.50068000 L  |
| C-C_R | -10.98322700 | -17.52919400 | -0.41795600 L |
| C-C_R | -9.62681000  | -16.59154600 | -2.20508600 L |
| C-C_R | -3.25898300  | -20.71038100 | 1.52486100 L  |
| H-H_  | -4.21466300  | -19.83125800 | -0.16321500 L |

|       |              |              |               |
|-------|--------------|--------------|---------------|
| H-H_  | -6.20773900  | -19.33538100 | 3.58963800 L  |
| C-C_R | -4.36373600  | -20.42436300 | 3.64513600 L  |
| C-C_R | -11.14391300 | -18.16332900 | 0.83285300 L  |
| C-C_R | -10.07302000 | -19.37828700 | 2.70487100 L  |
| H-H_  | -11.86148100 | -17.17465500 | -0.94097900 L |
| N-N_R | -9.55733600  | -16.02000300 | -3.21042600 L |
| H-H_  | -2.45160100  | -21.12908200 | 0.93694500 L  |
| C-C_R | -3.28856400  | -20.93092900 | 2.90577000 L  |
| H-H_  | -4.40497800  | -20.59306600 | 4.71377400 L  |
| N-N_R | -10.13908200 | -19.99245500 | 3.68570800 L  |
| N-N_R | -2.26218500  | -21.65329500 | 3.53384800 L  |
| C-C_R | -0.92551100  | -21.48024800 | 3.11996000 L  |
| C-C_R | -2.55793100  | -22.53401700 | 4.59432000 L  |
| C-C_R | -0.43814800  | -20.20789300 | 2.81424500 L  |
| C-C_R | -0.06917400  | -22.57982500 | 3.01674100 L  |
| C-C_R | -1.72727900  | -22.59368900 | 5.71590000 L  |
| C-C_R | -3.68630700  | -23.35544400 | 4.53620300 L  |
| H-H_  | -1.09699500  | -19.35122700 | 2.90032500 L  |
| C-C_R | 0.87776600   | -20.04146400 | 2.40885500 L  |
| H-H_  | -0.44548800  | -23.56904300 | 3.24728200 L  |
| C-C_R | 1.24943100   | -22.40348000 | 2.62341100 L  |
| H-H_  | -0.85582800  | -21.95250200 | 5.76819100 L  |
| C-C_R | -2.01831500  | -23.46781000 | 6.75289400 L  |
| H-H_  | -4.33047700  | -23.31530300 | 3.66678300 L  |
| C-C_R | -3.97892300  | -24.21183400 | 5.58608600 L  |
| H-H_  | 1.23885100   | -19.04580600 | 2.17907200 L  |
| C-C_R | 1.72995100   | -21.13603100 | 2.31422000 L  |
| H-H_  | 1.90049000   | -23.26552300 | 2.54788600 L  |
| C-C_R | -3.14705500  | -24.27850500 | 6.69789100 L  |
| H-H_  | -1.36532500  | -23.50305000 | 7.61673000 L  |
| H-H_  | -4.85882400  | -24.84065300 | 5.52808100 L  |
| H-H_  | 2.76110400   | -21.00254900 | 2.00676700 L  |
| H-H_  | -3.37555400  | -24.95369800 | 7.51364800 L  |
| C-C_R | -20.46839000 | 15.75278000  | -0.45847700 L |
| H-H_  | -19.52088900 | 15.23091500  | -0.51502000 L |
| C-C_R | -22.52718000 | 16.46683700  | -1.47797900 L |
| H-H_  | -23.17982600 | 16.52110200  | -2.34086900 L |
| C-C_R | -21.30860000 | 15.80063100  | -1.56613100 L |
| H-H_  | -21.01344600 | 15.32380500  | -2.49355000 L |
| C-C_R | -20.83831900 | 16.35800300  | 0.73090000 L  |
| C-C_R | -22.06217600 | 17.03209100  | 0.81889000 L  |
| H-H_  | -20.19278000 | 16.30706300  | 1.59819900 L  |
| N-N_R | -22.43679700 | 17.65812800  | 2.01948100 L  |
| C-C_R | -22.90554900 | 17.08384200  | -0.29839600 L |

|       |              |             |               |
|-------|--------------|-------------|---------------|
| C-C_R | -21.47300600 | 18.31960600 | 2.79506100 L  |
| C-C_R | -23.77549000 | 17.63074200 | 2.44431600 L  |
| H-H_  | -23.84364700 | 17.62354000 | -0.23606100 L |
| C-C_R | -21.50281000 | 18.22216700 | 4.19162700 L  |
| C-C_R | -20.46420500 | 19.07335800 | 2.18048600 L  |
| C-C_R | -24.55051300 | 16.47849900 | 2.26857700 L  |
| C-C_R | -24.34327600 | 18.75913100 | 3.04829500 L  |
| H-H_  | -22.25339800 | 17.60011700 | 4.66830900 L  |
| C-C_R | -20.56109900 | 18.88441500 | 4.95234700 L  |
| H-H_  | -20.43588800 | 19.15223500 | 1.10069700 L  |
| C-C_R | -19.52204900 | 19.72354600 | 2.95102300 L  |
| C-C_R | -25.87167700 | 16.46448400 | 2.68663200 L  |
| H-H_  | -24.10598300 | 15.59849400 | 1.81955300 L  |
| H-H_  | -23.74759600 | 19.65420700 | 3.17061400 L  |
| C-C_R | -25.66392000 | 18.73010200 | 3.46581000 L  |
| C-C_R | -19.56712800 | 19.66271300 | 4.34842700 L  |
| H-H_  | -20.57956000 | 18.78089300 | 6.03054900 L  |
| H-H_  | -18.72754600 | 20.29183500 | 2.48362300 L  |
| H-H_  | -26.46018300 | 15.56371300 | 2.55363000 L  |
| C-C_R | -26.43421700 | 17.58550100 | 3.28580000 L  |
| H-H_  | -26.09345900 | 19.61149100 | 3.92594000 L  |
| C-C_R | -18.51394400 | 20.34418300 | 5.13554900 L  |
| H-H_  | -27.46734000 | 17.56789500 | 3.61018800 L  |
| N-N_R | -17.31212600 | 20.29720700 | 4.57627200 L  |
| C-C_R | -18.71150500 | 20.94770700 | 6.39906000 L  |
| C-C_R | -16.25989300 | 20.73934300 | 5.27449000 L  |
| N-N_R | -17.65628900 | 21.30670800 | 7.13396000 L  |
| C-C_R | -20.02469100 | 21.26543600 | 6.98784300 L  |
| C-C_R | -16.44171400 | 21.18359600 | 6.61504000 L  |
| C-C_R | -14.96003200 | 20.72001900 | 4.69431200 L  |
| C-C_R | -21.11377900 | 21.67799200 | 6.21174000 L  |
| C-C_R | -20.18073100 | 21.22975100 | 8.37747200 L  |
| C-C_R | -15.28385500 | 21.52853600 | 7.38403900 L  |
| C-C_R | -13.83680100 | 21.11077300 | 5.45617000 L  |
| C-C_R | -14.84351300 | 20.22676600 | 3.36824300 L  |
| C-C_R | -22.32416700 | 22.00288700 | 6.79457800 L  |
| H-H_  | -21.00219900 | 21.78014800 | 5.13884100 L  |
| H-H_  | -19.33083700 | 20.94975300 | 8.98774400 L  |
| C-C_R | -21.38968100 | 21.54272300 | 8.96913000 L  |
| C-C_R | -14.03385600 | 21.47542700 | 6.80271800 L  |
| C-C_R | -15.44227600 | 21.96203700 | 8.72936900 L  |
| N-N_R | -14.75945700 | 19.82321100 | 2.28380800 L  |
| H-H_  | -23.15117100 | 22.34411600 | 6.18341100 L  |
| C-C_R | -22.48274900 | 21.92500100 | 8.18290600 L  |

|       |              |             |               |
|-------|--------------|-------------|---------------|
| H-H_  | -21.49987600 | 21.48749900 | 10.04583300 L |
| H-H_  | -13.17703200 | 21.77309600 | 7.39283900 L  |
| N-N_R | -15.55663300 | 22.31701600 | 9.82609800 L  |
| N-N_R | -23.71593100 | 22.24420200 | 8.77435100 L  |
| C-C_R | -24.91232900 | 21.81212600 | 8.17458300 L  |
| C-C_R | -23.75251100 | 22.98999900 | 9.97002600 L  |
| C-C_R | -24.99668900 | 20.53546600 | 7.61076500 L  |
| C-C_R | -26.03309400 | 22.64854500 | 8.13684400 L  |
| C-C_R | -24.67447400 | 22.67714900 | 10.97212100 L |
| C-C_R | -22.86012100 | 24.04868200 | 10.16557800 L |
| H-H_  | -24.13535200 | 19.88011800 | 7.64963100 L  |
| C-C_R | -26.17727400 | 20.10988200 | 7.02161700 L  |
| H-H_  | -25.96830200 | 23.64184800 | 8.56412900 L  |
| C-C_R | -27.21019900 | 22.20952800 | 7.55232600 L  |
| H-H_  | -25.35756200 | 21.84849500 | 10.83003000 L |
| C-C_R | -24.70393000 | 23.41758400 | 12.14408000 L |
| H-H_  | -22.14947600 | 24.29812500 | 9.38650400 L  |
| C-C_R | -22.88996000 | 24.77205200 | 11.34684500 L |
| H-H_  | -26.22885300 | 19.11124200 | 6.60174300 L  |
| C-C_R | -27.29179400 | 20.93983000 | 6.99021100 L  |
| H-H_  | -28.06972300 | 22.87146900 | 7.52820000 L  |
| C-C_R | -23.81215000 | 24.46509300 | 12.34049800 L |
| H-H_  | -25.42037600 | 23.16169000 | 12.91549000 L |
| H-H_  | -22.19049100 | 25.58963700 | 11.48468000 L |
| H-H_  | -28.21587100 | 20.60150900 | 6.53808400 L  |
| H-H_  | -23.83343100 | 25.03645800 | 13.26182200 L |
| C-C_R | -3.77553600  | 26.51146700 | -0.24532000 L |
| H-H_  | -4.52907100  | 27.29175400 | -0.25997500 L |
| C-C_R | -1.87357900  | 25.42890100 | -1.22999100 L |
| H-H_  | -1.14150300  | 25.34768000 | -2.02404900 L |
| C-C_R | -2.83697900  | 26.43067600 | -1.26782900 L |
| H-H_  | -2.85585200  | 27.14091000 | -2.08647000 L |
| C-C_R | -3.75143300  | 25.61128600 | 0.80812100 L  |
| C-C_R | -2.79060500  | 24.59679000 | 0.84165400 L  |
| H-H_  | -4.47719500  | 25.68404700 | 1.60830700 L  |
| N-N_R | -2.76766100  | 23.67323800 | 1.90677600 L  |
| C-C_R | -1.85189300  | 24.51085100 | -0.18942700 L |
| C-C_R | -3.96890600  | 23.15127400 | 2.41366700 L  |
| C-C_R | -1.53492700  | 23.25467300 | 2.44712600 L  |
| H-H_  | -1.11104500  | 23.72165000 | -0.17058100 L |
| C-C_R | -4.12163400  | 22.93225100 | 3.78746700 L  |
| C-C_R | -5.03429200  | 22.84531900 | 1.56062800 L  |
| C-C_R | -0.50366800  | 24.17616200 | 2.65385300 L  |
| C-C_R | -1.32544700  | 21.91431100 | 2.77664700 L  |

|       |              |             |              |
|-------|--------------|-------------|--------------|
| H-H_  | -3.31755400  | 23.19938200 | 4.46124000 L |
| C-C_R | -5.29331900  | 22.39400900 | 4.28646800 L |
| H-H_  | -4.93299200  | 23.01370400 | 0.49559900 L |
| C-C_R | -6.21067700  | 22.32799300 | 2.06984900 L |
| C-C_R | 0.71204800   | 23.75617000 | 3.17305300 L |
| H-H_  | -0.66455800  | 25.21819600 | 2.40498100 L |
| H-H_  | -2.11845100  | 21.19491700 | 2.61128300 L |
| C-C_R | -0.11011300  | 21.50622200 | 3.30712500 L |
| C-C_R | -6.35595100  | 22.06663300 | 3.43724500 L |
| H-H_  | -5.39251000  | 22.25157700 | 5.35414800 L |
| H-H_  | -7.03940900  | 22.10905800 | 1.40821700 L |
| H-H_  | 1.50075300   | 24.48340600 | 3.32919700 L |
| C-C_R | 0.91631000   | 22.42228700 | 3.50628800 L |
| H-H_  | 0.03588300   | 20.46078800 | 3.55473600 L |
| C-C_R | -7.63921800  | 21.54343400 | 3.93849400 L |
| H-H_  | 1.86715700   | 22.10036100 | 3.91257400 L |
| N-N_R | -8.71234500  | 21.96753600 | 3.29014100 L |
| C-C_R | -7.78394800  | 20.67015100 | 5.06512600 L |
| C-C_R | -9.91925600  | 21.66449400 | 3.76928100 L |
| N-N_R | -8.97351200  | 20.44753300 | 5.58960900 L |
| C-C_R | -6.67385800  | 19.92906900 | 5.69779100 L |
| C-C_R | -10.05863000 | 20.96168300 | 4.99078700 L |
| C-C_R | -11.09842100 | 22.08482600 | 3.08300900 L |
| C-C_R | -5.60797100  | 19.40186500 | 4.96038600 L |
| C-C_R | -6.72205700  | 19.66757800 | 7.06958800 L |
| C-C_R | -11.34849400 | 20.74892600 | 5.55210000 L |
| C-C_R | -12.33744200 | 21.84777600 | 3.63346400 L |
| C-C_R | -10.98102500 | 22.78542400 | 1.84633400 L |
| C-C_R | -4.61319800  | 18.66658900 | 5.57628100 L |
| H-H_  | -5.56887800  | 19.54571200 | 3.88820500 L |
| H-H_  | -7.56195400  | 20.04158800 | 7.64105700 L |
| C-C_R | -5.71795100  | 18.95260700 | 7.69655500 L |
| C-C_R | -12.49809400 | 21.21264700 | 4.88417000 L |
| C-C_R | -11.42723500 | 19.99868300 | 6.75629100 L |
| H-H_  | -13.21569600 | 22.20231500 | 3.11044100 L |
| N-N_R | -10.91151700 | 23.35597300 | 0.84089200 L |
| H-H_  | -3.80578200  | 18.24689400 | 4.98826200 L |
| C-C_R | -4.64277900  | 18.44604100 | 6.95718900 L |
| H-H_  | -5.75919400  | 18.78390400 | 8.76519300 L |
| N-N_R | -11.49326300 | 19.38352000 | 7.73702500 L |
| N-N_R | -3.61640100  | 17.72367500 | 7.58526800 L |
| C-C_R | -2.27972700  | 17.89672200 | 7.17137900 L |
| C-C_R | -3.91214600  | 16.84295300 | 8.64574000 L |
| C-C_R | -1.79236300  | 19.16907700 | 6.86566400 L |

|       |             |              |               |
|-------|-------------|--------------|---------------|
| C-C_R | -1.42338900 | 16.79714500  | 7.06816100 L  |
| C-C_R | -3.08146000 | 16.78228700  | 9.76721700 L  |
| C-C_R | -5.04052300 | 16.02152600  | 8.58762300 L  |
| H-H_  | -2.45117600 | 20.02474900  | 6.95164200 L  |
| C-C_R | -0.47644900 | 19.33550600  | 6.46027500 L  |
| H-H_  | -1.79966900 | 15.80693300  | 7.29859900 L  |
| C-C_R | -0.10478400 | 16.97349000  | 6.67483100 L  |
| H-H_  | -2.21004300 | 17.42446800  | 9.81961000 L  |
| C-C_R | -3.37253000 | 15.90916000  | 10.80431300 L |
| H-H_  | -5.68469200 | 16.06166700  | 7.71820200 L  |
| C-C_R | -5.33310400 | 15.16414200  | 9.63740300 L  |
| H-H_  | -0.11536500 | 20.33116400  | 6.23049100 L  |
| C-C_R | 0.37577000  | 18.23994400  | 6.36553700 L  |
| H-H_  | 0.54630900  | 16.11045300  | 6.59920300 L  |
| C-C_R | -4.50123600 | 15.09747100  | 10.74920900 L |
| H-H_  | -2.71954000 | 15.87392000  | 11.66815000 L |
| H-H_  | -6.21300500 | 14.53532300  | 9.57939900 L  |
| H-H_  | 1.40692300  | 18.37342700  | 6.05808400 L  |
| H-H_  | -4.72976900 | 14.42327200  | 11.56506800 L |
| C-C_R | 10.77774800 | -22.58772000 | -4.59208200 L |
| H-H_  | 11.72524900 | -23.10958500 | -4.64862500 L |
| C-C_R | 8.71895800  | -21.87366300 | -5.61158400 L |
| H-H_  | 8.06631200  | -21.81939700 | -6.47447500 L |
| C-C_R | 9.93753800  | -22.53986800 | -5.69973600 L |
| H-H_  | 10.23265800 | -23.01570000 | -6.62705300 L |
| C-C_R | 10.40782000 | -21.98249600 | -3.40270500 L |
| C-C_R | 9.18392900  | -21.30741500 | -3.31461300 L |
| H-H_  | 11.05335800 | -22.03343600 | -2.53540600 L |
| N-N_R | 8.80934100  | -20.68237200 | -2.11412400 L |
| C-C_R | 8.34055500  | -21.25566300 | -4.43189900 L |
| C-C_R | 9.77413200  | -20.02085900 | -1.33854700 L |
| C-C_R | 7.47061400  | -20.70876300 | -1.68918700 L |
| H-H_  | 7.40349100  | -20.71692500 | -4.36966900 L |
| C-C_R | 9.74332900  | -20.11833300 | 0.05802200 L  |
| C-C_R | 10.78193400 | -19.26714200 | -1.95311900 L |
| C-C_R | 6.69562600  | -21.86200100 | -1.86502800 L |
| C-C_R | 6.90286300  | -19.58136800 | -1.08531000 L |
| H-H_  | 8.99370600  | -20.73935400 | 0.53480300 L  |
| C-C_R | 10.68500500 | -19.45509100 | 0.81884400 L  |
| H-H_  | 10.81021600 | -19.18727000 | -3.03280600 L |
| C-C_R | 11.72508900 | -18.61691900 | -1.18258500 L |
| C-C_R | 5.37446200  | -21.87601600 | -1.44697300 L |
| H-H_  | 7.14012100  | -22.74101100 | -2.31395000 L |
| H-H_  | 7.49850800  | -18.68529900 | -0.96288900 L |

|       |             |              |               |
|-------|-------------|--------------|---------------|
| C-C_R | 5.58321700  | -19.61036300 | -0.66779700 L |
| C-C_R | 11.67897600 | -18.67679300 | 0.21492500 L  |
| H-H_  | 10.66657800 | -19.55960700 | 1.89694400 L  |
| H-H_  | 12.51859300 | -18.04866500 | -1.64998200 L |
| H-H_  | 4.78595500  | -22.77678700 | -1.57997500 L |
| C-C_R | 4.81188700  | -20.75400400 | -0.84770300 L |
| H-H_  | 5.15268000  | -18.72900900 | -0.20766500 L |
| C-C_R | 12.73219500 | -17.99631600 | 1.00194400 L  |
| H-H_  | 3.77879900  | -20.77260500 | -0.52341700 L |
| N-N_R | 13.93401200 | -18.04329200 | 0.44266700 L  |
| C-C_R | 12.53463300 | -17.39279300 | 2.26545500 L  |
| C-C_R | 14.98624500 | -17.60115600 | 1.14088400 L  |
| N-N_R | 13.58985000 | -17.03379200 | 3.00035500 L  |
| C-C_R | 11.22144700 | -17.07506300 | 2.85423800 L  |
| C-C_R | 14.80442400 | -17.15690400 | 2.48143500 L  |
| C-C_R | 16.28610600 | -17.62048100 | 0.56070700 L  |
| C-C_R | 10.13232600 | -16.66151300 | 2.07823700 L  |
| C-C_R | 11.06537300 | -17.10975400 | 4.24396900 L  |
| C-C_R | 15.96224900 | -16.81096900 | 3.25053600 L  |
| C-C_R | 17.40930300 | -17.22873300 | 1.32266700 L  |
| C-C_R | 16.40262600 | -18.11373300 | -0.76536200 L |
| C-C_R | 8.92297100  | -16.33757800 | 2.66097000 L  |
| H-H_  | 10.24393900 | -16.56035200 | 1.00523600 L  |
| H-H_  | 11.91526700 | -17.38975300 | 4.85424100 L  |
| C-C_R | 9.85645700  | -16.79777700 | 4.83552400 L  |
| C-C_R | 17.21224800 | -16.86407900 | 2.66921500 L  |
| C-C_R | 15.80386200 | -16.37846200 | 4.59576400 L  |
| N-N_R | 16.48668100 | -18.51728900 | -1.84979700 L |
| H-H_  | 8.09593300  | -15.99535400 | 2.04990600 L  |
| C-C_R | 8.76338900  | -16.41549800 | 4.04930100 L  |
| H-H_  | 9.74622900  | -16.85200600 | 5.91233000 L  |
| H-H_  | 18.06910600 | -16.56740400 | 3.25923400 L  |
| N-N_R | 15.68947200 | -16.02248900 | 5.69259500 L  |
| N-N_R | 7.53020800  | -16.09629700 | 4.64074600 L  |
| C-C_R | 6.33377500  | -16.52738000 | 4.04108000 L  |
| C-C_R | 7.49359300  | -15.34950700 | 5.83652400 L  |
| C-C_R | 6.24944900  | -17.80503300 | 3.47716000 L  |
| C-C_R | 5.21304400  | -15.69195400 | 4.00323900 L  |
| C-C_R | 6.57163000  | -15.66235600 | 6.83861800 L  |
| C-C_R | 8.38601700  | -14.29181700 | 6.03197300 L  |
| H-H_  | 7.11078600  | -18.46038200 | 3.51602600 L  |
| C-C_R | 5.06886500  | -18.23061700 | 2.88801100 L  |
| H-H_  | 5.27783600  | -14.69865100 | 4.43052400 L  |
| C-C_R | 4.03690500  | -16.12994300 | 3.41882100 L  |

|       |             |              |               |
|-------|-------------|--------------|---------------|
| H-H_  | 5.88857700  | -16.49200500 | 6.69642500 L  |
| C-C_R | 6.54220900  | -14.92291600 | 8.01047500 L  |
| H-H_  | 9.09666200  | -14.04237500 | 5.25289900 L  |
| C-C_R | 8.35614400  | -13.56745300 | 7.21334200 L  |
| H-H_  | 5.01728600  | -19.22925800 | 2.46813800 L  |
| C-C_R | 3.95434500  | -17.40067000 | 2.85660600 L  |
| H-H_  | 3.17741500  | -15.46899600 | 3.39459200 L  |
| C-C_R | 7.43395400  | -13.87441200 | 8.20699500 L  |
| H-H_  | 5.82576300  | -15.17881000 | 8.78188500 L  |
| H-H_  | 9.05564800  | -12.75086200 | 7.35107500 L  |
| H-H_  | 3.03026800  | -17.73899100 | 2.40447900 L  |
| H-H_  | 7.41270700  | -13.30404200 | 9.12821700 L  |
| C-C_R | 27.47056800 | -11.82803800 | -4.37882300 L |
| H-H_  | 26.71706700 | -11.04874600 | -4.39358000 L |
| C-C_R | 29.37256000 | -12.91159800 | -5.36359600 L |
| H-H_  | 30.10463500 | -12.99282000 | -6.15765400 L |
| C-C_R | 28.40912500 | -11.90883000 | -5.40133200 L |
| H-H_  | 28.39028700 | -11.19958900 | -6.22007500 L |
| C-C_R | 27.49470500 | -12.72921300 | -3.32548400 L |
| C-C_R | 28.45549900 | -13.74271500 | -3.29184900 L |
| H-H_  | 26.76891000 | -12.65545800 | -2.52519600 L |
| N-N_R | 28.47847800 | -14.66726100 | -2.22682900 L |
| C-C_R | 29.39421100 | -13.82865500 | -4.32293000 L |
| C-C_R | 27.27723200 | -15.18922600 | -1.71993800 L |
| C-C_R | 29.71117800 | -15.08483200 | -1.68637600 L |
| H-H_  | 30.13509300 | -14.61885000 | -4.30418600 L |
| C-C_R | 27.12450400 | -15.40824800 | -0.34613800 L |
| C-C_R | 26.21184600 | -15.49518100 | -2.57297700 L |
| C-C_R | 30.74247100 | -14.16433800 | -1.47975300 L |
| C-C_R | 29.92069100 | -16.42618800 | -1.35695800 L |
| H-H_  | 27.92855100 | -15.14012300 | 0.32773700 L  |
| C-C_R | 25.95381800 | -15.94645500 | 0.15286100 L  |
| H-H_  | 26.31311200 | -15.32580100 | -3.63790300 L |
| C-C_R | 25.03542700 | -16.01151200 | -2.06365400 L |
| C-C_R | 31.95815200 | -14.58333500 | -0.96045000 L |
| H-H_  | 30.58158000 | -13.12230400 | -1.72862400 L |
| H-H_  | 29.12768700 | -17.14558300 | -1.52232200 L |
| C-C_R | 31.13602500 | -16.83427700 | -0.82648000 L |
| C-C_R | 24.89018800 | -16.27386600 | -0.69636000 L |
| H-H_  | 25.85359400 | -16.08792900 | 1.22064500 L  |
| H-H_  | 24.20669500 | -16.23044700 | -2.72528600 L |
| H-H_  | 32.74689100 | -13.85709300 | -0.80440800 L |
| C-C_R | 32.16241400 | -15.91721800 | -0.62721500 L |
| H-H_  | 31.28202100 | -17.87971100 | -0.57886900 L |



|       |             |              |               |
|-------|-------------|--------------|---------------|
| C-C_R | 23.60692000 | -16.79706500 | -0.19511100 L |
| H-H_  | 33.11429400 | -16.24010300 | -0.22103400 L |
| N-N_R | 22.53379400 | -16.37296300 | -0.84346400 L |
| C-C_R | 23.46219000 | -17.67034800 | 0.93152100 L  |
| C-C_R | 21.32684800 | -16.67501200 | -0.36422200 L |
| N-N_R | 22.27262700 | -17.89296700 | 1.45600400 L  |
| C-C_R | 24.57224600 | -18.41043600 | 1.56428900 L  |
| C-C_R | 21.18750900 | -17.37881600 | 0.85718200 L  |
| C-C_R | 20.14768400 | -16.25467900 | -1.05049400 L |
| C-C_R | 25.63913300 | -18.93760600 | 0.82688100 L  |
| C-C_R | 24.52408200 | -18.67292200 | 2.93598300 L  |
| C-C_R | 19.89764400 | -17.59157400 | 1.41849500 L  |
| C-C_R | 18.90869600 | -16.49272300 | -0.50014100 L |
| C-C_R | 20.26511300 | -15.55507600 | -2.28727100 L |
| C-C_R | 26.63294000 | -19.67391000 | 1.44267500 L  |
| H-H_  | 25.67726000 | -18.79478800 | -0.24540000 L |
| H-H_  | 23.68418400 | -18.29891100 | 3.50745200 L  |
| C-C_R | 25.52818700 | -19.38789200 | 3.56295000 L  |
| C-C_R | 18.74901000 | -17.12682400 | 0.75066400 L  |
| C-C_R | 19.81890400 | -18.34181600 | 2.62268600 L  |
| H-H_  | 18.03044200 | -16.13818400 | -1.02316400 L |
| N-N_R | 20.33458700 | -14.98353300 | -3.29261100 L |
| H-H_  | 27.44032200 | -20.09261100 | 0.85475900 L  |
| C-C_R | 26.60336000 | -19.89445800 | 2.82358400 L  |
| H-H_  | 25.48794400 | -19.55656100 | 4.63158500 L  |
| N-N_R | 19.75284100 | -18.95598500 | 3.60352300 L  |
| N-N_R | 27.62973800 | -20.61682400 | 3.45166200 L  |
| C-C_R | 28.96641200 | -20.44377800 | 3.03777400 L  |
| C-C_R | 27.33399300 | -21.49754700 | 4.51213500 L  |
| C-C_R | 29.45377500 | -19.17142200 | 2.73205900 L  |
| C-C_R | 29.82274900 | -21.54335500 | 2.93455600 L  |
| C-C_R | 28.16564400 | -21.55718400 | 5.63371200 L  |
| C-C_R | 26.20561600 | -22.31897300 | 4.45401800 L  |
| H-H_  | 28.79492800 | -18.31475600 | 2.81813900 L  |
| C-C_R | 30.76969000 | -19.00499300 | 2.32667000 L  |
| H-H_  | 29.44643500 | -22.53257300 | 3.16509700 L  |
| C-C_R | 31.14135500 | -21.36701000 | 2.54122600 L  |
| H-H_  | 29.03609600 | -20.91603200 | 5.68600500 L  |
| C-C_R | 27.87360900 | -22.43134000 | 6.67070800 L  |
| H-H_  | 25.56144700 | -22.27883200 | 3.58459700 L  |
| C-C_R | 25.91300000 | -23.17536300 | 5.50390000 L  |
| H-H_  | 31.13077400 | -18.00933600 | 2.09688600 L  |
| C-C_R | 31.62187500 | -20.09956100 | 2.23203400 L  |
| H-H_  | 31.79241300 | -22.22905300 | 2.46570100 L  |

|       |             |              |               |
|-------|-------------|--------------|---------------|
| C-C_R | 26.74586800 | -23.24200000 | 6.61570300 L  |
| H-H_  | 28.52659800 | -22.46657900 | 7.53454500 L  |
| H-H_  | 25.03310000 | -23.80418200 | 5.44589600 L  |
| H-H_  | 32.65302700 | -19.96607800 | 1.92458100 L  |
| H-H_  | 26.51636900 | -23.91722700 | 7.43146300 L  |
| C-C_R | 9.42353300  | 16.78925000  | -0.54066300 L |
| H-H_  | 10.37103400 | 16.26738500  | -0.59720500 L |
| C-C_R | 7.36474300  | 17.50330700  | -1.56016400 L |
| H-H_  | 6.71209700  | 17.55757300  | -2.42305500 L |
| C-C_R | 8.58332300  | 16.83710200  | -1.64831600 L |
| H-H_  | 8.87847700  | 16.36027600  | -2.57573600 L |
| C-C_R | 9.05360500  | 17.39447400  | 0.64871500 L  |
| C-C_R | 7.82974800  | 18.06856100  | 0.73670400 L  |
| H-H_  | 9.69914300  | 17.34353400  | 1.51601300 L  |
| N-N_R | 7.45512600  | 18.69459800  | 1.93729600 L  |
| C-C_R | 6.98637400  | 18.12031200  | -0.38058200 L |
| C-C_R | 8.41991700  | 19.35611100  | 2.71287300 L  |
| C-C_R | 6.11643300  | 18.66721200  | 2.36213100 L  |
| H-H_  | 6.04927600  | 18.66004500  | -0.31824900 L |
| C-C_R | 8.38911300  | 19.25863700  | 4.10944200 L  |
| C-C_R | 9.42771900  | 20.10982800  | 2.09830100 L  |
| C-C_R | 5.34141100  | 17.51496900  | 2.18639100 L  |
| C-C_R | 5.54864800  | 19.79560200  | 2.96610900 L  |
| H-H_  | 7.63952500  | 18.63662200  | 4.58612100 L  |
| C-C_R | 9.33082400  | 19.92088500  | 4.87016100 L  |
| H-H_  | 9.45603500  | 20.18870600  | 1.01851100 L  |
| C-C_R | 10.37087400 | 20.76005100  | 2.86883400 L  |
| C-C_R | 4.02024700  | 17.50095400  | 2.60444600 L  |
| H-H_  | 5.78594000  | 16.63496400  | 1.73736800 L  |
| H-H_  | 6.14432700  | 20.69067700  | 3.08842900 L  |
| C-C_R | 4.22900200  | 19.76660700  | 3.38362200 L  |
| C-C_R | 10.32479500 | 20.69918300  | 4.26624200 L  |
| H-H_  | 9.31236300  | 19.81736300  | 5.94836300 L  |
| H-H_  | 11.16437700 | 21.32830500  | 2.40143800 L  |
| H-H_  | 3.43174000  | 16.60018300  | 2.47144400 L  |
| C-C_R | 3.45770600  | 18.62197200  | 3.20361400 L  |
| H-H_  | 3.79846500  | 20.64796100  | 3.84375400 L  |
| C-C_R | 11.37797900 | 21.38065400  | 5.05336300 L  |
| H-H_  | 2.42458300  | 18.60436500  | 3.52800300 L  |
| N-N_R | 12.57979700 | 21.33367800  | 4.49408700 L  |
| C-C_R | 11.18041800 | 21.98417700  | 6.31687500 L  |
| C-C_R | 13.63203000 | 21.77581400  | 5.19230400 L  |
| N-N_R | 12.23563400 | 22.34317800  | 7.05177500 L  |
| C-C_R | 9.86723200  | 22.30190700  | 6.90565700 L  |

|       |             |             |               |
|-------|-------------|-------------|---------------|
| C-C_R | 13.45020900 | 22.22006600 | 6.53285400 L  |
| C-C_R | 14.93189100 | 21.75648900 | 4.61212700 L  |
| C-C_R | 8.77814500  | 22.71446300 | 6.12955400 L  |
| C-C_R | 9.71119200  | 22.26622100 | 8.29528600 L  |
| C-C_R | 14.60806800 | 22.56500700 | 7.30185300 L  |
| C-C_R | 16.05512200 | 22.14724300 | 5.37398400 L  |
| C-C_R | 15.04841000 | 21.26323700 | 3.28605800 L  |
| C-C_R | 7.56875600  | 23.03939200 | 6.71239000 L  |
| H-H_  | 8.88972400  | 22.81661800 | 5.05665600 L  |
| H-H_  | 10.56108600 | 21.98622300 | 8.90555800 L  |
| C-C_R | 8.50224200  | 22.57919300 | 8.88694400 L  |
| C-C_R | 15.85806700 | 22.51189700 | 6.72053200 L  |
| C-C_R | 14.44964700 | 22.99850800 | 8.64718300 L  |
| N-N_R | 15.13246600 | 20.85968100 | 2.20162200 L  |
| H-H_  | 6.74175200  | 23.38062100 | 6.10122300 L  |
| C-C_R | 7.40917400  | 22.96147100 | 8.10072100 L  |
| H-H_  | 8.39204800  | 22.52397000 | 9.96364700 L  |
| H-H_  | 16.71489100 | 22.80956600 | 7.31065400 L  |
| N-N_R | 14.33529100 | 23.35348600 | 9.74391200 L  |
| N-N_R | 6.17599300  | 23.28067300 | 8.69216600 L  |
| C-C_R | 4.97959400  | 22.84859600 | 8.09239700 L  |
| C-C_R | 6.13941200  | 24.02646900 | 9.88784100 L  |
| C-C_R | 4.89523400  | 21.57193700 | 7.52858000 L  |
| C-C_R | 3.85882900  | 23.68501600 | 8.05465900 L  |
| C-C_R | 5.21744900  | 23.71362000 | 10.88993500 L |
| C-C_R | 7.03180200  | 25.08515300 | 10.08339200 L |
| H-H_  | 5.75657100  | 20.91658800 | 7.56744500 L  |
| C-C_R | 3.71465000  | 21.14635200 | 6.93943100 L  |
| H-H_  | 3.92362100  | 24.67831900 | 8.48194300 L  |
| C-C_R | 2.68272400  | 23.24603300 | 7.47013800 L  |
| H-H_  | 4.53436100  | 22.88496500 | 10.74784500 L |
| C-C_R | 5.18799400  | 24.45405400 | 12.06189400 L |
| H-H_  | 7.74244700  | 25.33459500 | 9.30431900 L  |
| C-C_R | 7.00196300  | 25.80852300 | 11.26465900 L |
| H-H_  | 3.66307000  | 20.14771200 | 6.51955800 L  |
| C-C_R | 2.60012900  | 21.97630000 | 6.90802600 L  |
| H-H_  | 1.82320000  | 23.90797400 | 7.44601200 L  |
| C-C_R | 6.07977300  | 25.50156300 | 12.25831200 L |
| H-H_  | 4.47154800  | 24.19816000 | 12.83330500 L |
| H-H_  | 7.70143300  | 26.62610800 | 11.40249400 L |
| H-H_  | 1.67605200  | 21.63797900 | 6.45589900 L  |
| H-H_  | 6.05849200  | 26.07292800 | 13.17963700 L |
| C-C_R | 26.11638700 | 27.54793800 | -0.32750600 L |
| H-H_  | 25.36285200 | 28.32822400 | -0.34216100 L |

|       |             |             |               |
|-------|-------------|-------------|---------------|
| C-C_R | 28.01834500 | 26.46537200 | -1.31217600 L |
| H-H_  | 28.75042000 | 26.38415000 | -2.10623400 L |
| C-C_R | 27.05494400 | 27.46714600 | -1.35001500 L |
| H-H_  | 27.03607100 | 28.17738100 | -2.16865600 L |
| C-C_R | 26.14049000 | 26.64775700 | 0.72593500 L  |
| C-C_R | 27.10131800 | 25.63326000 | 0.75946800 L  |
| H-H_  | 25.41472900 | 26.72051800 | 1.52612200 L  |
| N-N_R | 27.12426200 | 24.70970900 | 1.82459100 L  |
| C-C_R | 28.04003000 | 25.54732100 | -0.27161300 L |
| C-C_R | 25.92301700 | 24.18774400 | 2.33148100 L  |
| C-C_R | 28.35699700 | 24.29114400 | 2.36494100 L  |
| H-H_  | 28.78087800 | 24.75812000 | -0.25276700 L |
| C-C_R | 25.77028900 | 23.96872200 | 3.70528200 L  |
| C-C_R | 24.85763100 | 23.88178900 | 1.47844200 L  |
| C-C_R | 29.38825600 | 25.21263200 | 2.57166700 L  |
| C-C_R | 28.56647600 | 22.95078200 | 2.69446200 L  |
| H-H_  | 26.57437000 | 24.23585300 | 4.37905400 L  |
| C-C_R | 24.59960300 | 23.43051500 | 4.20428000 L  |
| H-H_  | 24.95893100 | 24.05017400 | 0.41341400 L  |
| C-C_R | 23.68124600 | 23.36446300 | 1.98766300 L  |
| C-C_R | 30.60397100 | 24.79264000 | 3.09086700 L  |
| H-H_  | 29.22736500 | 26.25466600 | 2.32279600 L  |
| H-H_  | 27.77347200 | 22.23138700 | 2.52909800 L  |
| C-C_R | 29.78181000 | 22.54269300 | 3.22493900 L  |
| C-C_R | 23.53597300 | 23.10310400 | 3.35505900 L  |
| H-H_  | 24.49941300 | 23.28804700 | 5.27196300 L  |
| H-H_  | 22.85251400 | 23.14552900 | 1.32603100 L  |
| H-H_  | 31.39267600 | 25.51987700 | 3.24701100 L  |
| C-C_R | 30.80823300 | 23.45875800 | 3.42410200 L  |
| H-H_  | 29.92780600 | 21.49725900 | 3.47255000 L  |
| C-C_R | 22.25270500 | 22.57990500 | 3.85630900 L  |
| H-H_  | 31.76007900 | 23.13686700 | 3.83038500 L  |
| N-N_R | 21.17957800 | 23.00400700 | 3.20795500 L  |
| C-C_R | 22.10797500 | 21.70662200 | 4.98294100 L  |
| C-C_R | 19.97266700 | 22.70096400 | 3.68709500 L  |
| N-N_R | 20.91841200 | 21.48400300 | 5.50742300 L  |
| C-C_R | 23.21806500 | 20.96554000 | 5.61560600 L  |
| C-C_R | 19.83329300 | 21.99815400 | 4.90860200 L  |
| C-C_R | 18.79350300 | 23.12129700 | 3.00082300 L  |
| C-C_R | 24.28495200 | 20.43837000 | 4.87819800 L  |
| C-C_R | 23.16986700 | 20.70404800 | 6.98740200 L  |
| C-C_R | 18.54342900 | 21.78539600 | 5.46991400 L  |
| C-C_R | 17.55448100 | 22.88424700 | 3.55127800 L  |
| C-C_R | 18.91089800 | 23.82189400 | 1.76414900 L  |

|       |              |              |                |
|-------|--------------|--------------|----------------|
| C-C_R | 25.27872500  | 19.70306000  | 5.49409500 L   |
| H-H_  | 24.32304500  | 20.58218200  | 3.80601900 L   |
| H-H_  | 22.32996900  | 21.07805900  | 7.55887200 L   |
| C-C_R | 24.17397200  | 19.98907800  | 7.61437000 L   |
| C-C_R | 17.39482900  | 22.24915200  | 4.80198200 L   |
| C-C_R | 18.46468800  | 21.03515400  | 6.67410500 L   |
| H-H_  | 16.67622700  | 23.23878600  | 3.02825500 L   |
| N-N_R | 18.98040600  | 24.39244300  | 0.75870600 L   |
| H-H_  | 26.08614100  | 19.28336500  | 4.90607700 L   |
| C-C_R | 25.24914400  | 19.48251200  | 6.87500400 L   |
| H-H_  | 24.13372900  | 19.82040900  | 8.68300500 L   |
| N-N_R | 18.39866000  | 20.41999100  | 7.65484000 L   |
| N-N_R | 26.27552300  | 18.76014600  | 7.50308200 L   |
| C-C_R | 27.61219700  | 18.93319200  | 7.08919400 L   |
| C-C_R | 25.97977700  | 17.87942300  | 8.56355500 L   |
| C-C_R | 28.09956000  | 20.20554800  | 6.78347900 L   |
| C-C_R | 28.46853400  | 17.83361500  | 6.98597500 L   |
| C-C_R | 26.81146300  | 17.81879200  | 9.68502900 L   |
| C-C_R | 24.85140100  | 17.05799700  | 8.50543700 L   |
| H-H_  | 27.44074700  | 21.06121900  | 6.86945600 L   |
| C-C_R | 29.41547400  | 20.37197700  | 6.37808900 L   |
| H-H_  | 28.09225400  | 16.84340300  | 7.21641400 L   |
| C-C_R | 29.78713900  | 18.00996000  | 6.59264500 L   |
| H-H_  | 27.68188000  | 18.46093800  | 9.73742500 L   |
| C-C_R | 26.51939400  | 16.94563000  | 10.72212800 L  |
| H-H_  | 24.20723100  | 17.09813800  | 7.63601700 L   |
| C-C_R | 24.55881900  | 16.20061300  | 9.55521800 L   |
| H-H_  | 29.77655900  | 21.36763400  | 6.14830600 L   |
| C-C_R | 30.26769400  | 19.27641500  | 6.28335100 L   |
| H-H_  | 30.43823200  | 17.14692300  | 6.51701800 L   |
| C-C_R | 25.39168700  | 16.13397600  | 10.66702000 L  |
| H-H_  | 27.17238300  | 16.91039100  | 11.58596400 L  |
| H-H_  | 23.67891900  | 15.57179400  | 9.49721300 L   |
| H-H_  | 31.29884600  | 19.40989800  | 5.97589900 L   |
| H-H_  | 25.16215400  | 15.45974300  | 11.48288200 L  |
| C-C_R | -19.16397100 | -22.81387400 | -12.40225100 L |
| H-H_  | -18.21647600 | -23.33563600 | -12.45978900 L |
| C-C_R | -21.22276800 | -22.09971500 | -13.42274800 L |
| H-H_  | -21.87541300 | -22.04544900 | -14.28563900 L |
| C-C_R | -20.00418100 | -22.76602200 | -13.50990500 L |
| H-H_  | -19.70906800 | -23.24175200 | -14.43821700 L |
| C-C_R | -19.53390600 | -22.20854800 | -11.21386900 L |
| C-C_R | -20.75779700 | -21.53346700 | -11.12577700 L |
| H-H_  | -18.88836700 | -22.25948800 | -10.34657000 L |

|       |              |              |                |
|-------|--------------|--------------|----------------|
| N-N_R | -21.13237800 | -20.90852600 | -9.92429300 L  |
| C-C_R | -21.60117000 | -21.48171500 | -12.24306300 L |
| C-C_R | -20.16859300 | -20.24694500 | -9.14970800 L  |
| C-C_R | -22.47111100 | -20.93481500 | -9.50035100 L  |
| H-H_  | -22.53923400 | -20.94301200 | -12.18083000 L |
| C-C_R | -20.19839700 | -20.34438500 | -7.75314200 L  |
| C-C_R | -19.15978600 | -19.49329600 | -9.76328800 L  |
| C-C_R | -23.24610000 | -22.08805300 | -9.67619200 L  |
| C-C_R | -23.03886300 | -19.80742000 | -8.89647400 L  |
| H-H_  | -20.94901900 | -20.96544000 | -7.27635800 L  |
| C-C_R | -19.25672100 | -19.68114200 | -6.99232000 L  |
| H-H_  | -19.13150900 | -19.41332200 | -10.84397000 L |
| C-C_R | -18.21763000 | -18.84310700 | -8.99275200 L  |
| C-C_R | -24.56726400 | -22.10206800 | -9.25813700 L  |
| H-H_  | -22.80160400 | -22.96706300 | -10.12511300 L |
| H-H_  | -22.44321800 | -18.91135000 | -8.77405300 L  |
| C-C_R | -24.35950200 | -19.83655200 | -8.47796400 L  |
| C-C_R | -18.26275000 | -18.90284500 | -7.59623900 L  |
| H-H_  | -19.27514800 | -19.78565900 | -5.91422000 L  |
| H-H_  | -17.42313300 | -18.27471700 | -9.46114600 L  |
| H-H_  | -25.15577100 | -23.00283900 | -9.39113900 L  |
| C-C_R | -25.12983800 | -20.98005600 | -8.65886700 L  |
| H-H_  | -24.78904600 | -18.95506000 | -8.01882900 L  |
| C-C_R | -17.20953100 | -18.22236800 | -6.80922000 L  |
| H-H_  | -26.16292700 | -20.99865700 | -8.33458100 L  |
| N-N_R | -16.00771400 | -18.26934400 | -7.36849700 L  |
| C-C_R | -17.40709300 | -17.61884400 | -5.54570900 L  |
| C-C_R | -14.95548100 | -17.82720800 | -6.67028000 L  |
| N-N_R | -16.35187600 | -17.25984300 | -4.81080900 L  |
| C-C_R | -18.72027900 | -17.30111500 | -4.95692600 L  |
| C-C_R | -15.13730200 | -17.38295500 | -5.32972900 L  |
| C-C_R | -13.65562000 | -17.84653300 | -7.25045700 L  |
| C-C_R | -19.80940000 | -16.88756500 | -5.73292700 L  |
| C-C_R | -18.87634600 | -17.33590800 | -3.56620000 L  |
| C-C_R | -13.97947000 | -17.03712300 | -4.55963300 L  |
| C-C_R | -12.53241600 | -17.45488700 | -6.48750200 L  |
| C-C_R | -13.53910000 | -18.33978500 | -8.57652600 L  |
| C-C_R | -21.01975400 | -16.56366500 | -5.15019100 L  |
| H-H_  | -19.69778600 | -16.78640400 | -6.80592800 L  |
| H-H_  | -18.02645300 | -17.61590700 | -2.95592800 L  |
| C-C_R | -20.08526800 | -17.02382900 | -2.97563900 L  |
| C-C_R | -12.72947800 | -17.09013100 | -5.14194900 L  |
| C-C_R | -14.13786300 | -16.60451400 | -3.21540000 L  |
| N-N_R | -13.45504500 | -18.74334100 | -9.66096100 L  |

|       |              |              |                |
|-------|--------------|--------------|----------------|
| H-H_  | -21.84678600 | -16.22154300 | -5.76026100 L  |
| C-C_R | -21.17833700 | -16.64155000 | -3.76186300 L  |
| H-H_  | -20.19549700 | -17.07805800 | -1.89883400 L  |
| H-H_  | -11.87261900 | -16.79345500 | -4.55193000 L  |
| N-N_R | -14.25225400 | -16.24854100 | -2.11856900 L  |
| N-N_R | -22.41151200 | -16.32245100 | -3.16942300 L  |
| C-C_R | -23.60795000 | -16.75343200 | -3.77008400 L  |
| C-C_R | -22.44813300 | -15.57555900 | -1.97464000 L  |
| C-C_R | -23.69227600 | -18.03108500 | -4.33400400 L  |
| C-C_R | -24.72868200 | -15.91800600 | -3.80792500 L  |
| C-C_R | -23.37009500 | -15.88840800 | -0.97254600 L  |
| C-C_R | -21.55570900 | -14.51786900 | -1.77919100 L  |
| H-H_  | -22.83093900 | -18.68643400 | -4.29513800 L  |
| C-C_R | -24.87286100 | -18.45666900 | -4.92315300 L  |
| H-H_  | -24.66388900 | -14.92470300 | -3.38064000 L  |
| C-C_R | -25.90582000 | -16.35603000 | -4.39234000 L  |
| H-H_  | -24.05314900 | -16.71805700 | -1.11473900 L  |
| C-C_R | -23.39951700 | -15.14896800 | 0.19931100 L   |
| H-H_  | -20.84505700 | -14.26852900 | -2.55727000 L  |
| C-C_R | -21.58558200 | -13.79350500 | -0.59782200 L  |
| H-H_  | -24.92444000 | -19.45531000 | -5.34302600 L  |
| C-C_R | -25.98738100 | -17.62672200 | -4.95455800 L  |
| H-H_  | -26.76531000 | -15.69508200 | -4.41656900 L  |
| C-C_R | -22.50777200 | -14.10046400 | 0.39583100 L   |
| H-H_  | -24.11596300 | -15.40486200 | 0.97072100 L   |
| H-H_  | -20.88607200 | -12.97701600 | -0.45909500 L  |
| H-H_  | -26.91145200 | -17.96514500 | -5.40569000 L  |
| H-H_  | -22.52901800 | -13.53009400 | 1.31705300 L   |
| C-C_R | -2.47115800  | -12.05409000 | -12.18998700 L |
| H-H_  | -3.22465300  | -11.27490000 | -12.20375000 L |
| C-C_R | -0.56916000  | -13.13775200 | -13.17376500 L |
| H-H_  | 0.16291600   | -13.21897400 | -13.96782300 L |
| C-C_R | -1.53259400  | -12.13498400 | -13.21150100 L |
| H-H_  | -1.55143900  | -11.42564100 | -14.03123900 L |
| C-C_R | -2.44702100  | -12.95526500 | -11.13664800 L |
| C-C_R | -1.48622700  | -13.96876700 | -11.10301300 L |
| H-H_  | -3.17281000  | -12.88161200 | -10.33536500 L |
| N-N_R | -1.46324800  | -14.89331300 | -10.03799300 L |
| C-C_R | -0.54751500  | -14.05470600 | -12.13409400 L |
| C-C_R | -2.66449400  | -15.41527800 | -9.53110200 L  |
| C-C_R | -0.23054800  | -15.31088400 | -9.49754000 L  |
| H-H_  | 0.19336700   | -14.84490200 | -12.11535000 L |
| C-C_R | -2.81722100  | -15.63430000 | -8.15730200 L  |
| C-C_R | -3.72987900  | -15.72123300 | -10.38414100 L |

|       |              |              |                |
|-------|--------------|--------------|----------------|
| C-C_R | 0.80074500   | -14.39039000 | -9.29091700 L  |
| C-C_R | -0.02102800  | -16.65234200 | -9.16712700 L  |
| H-H_  | -2.01317500  | -15.36617500 | -7.48342700 L  |
| C-C_R | -3.98890700  | -16.17254200 | -7.65830100 L  |
| H-H_  | -3.62860800  | -15.55195500 | -11.44807300 L |
| C-C_R | -4.90629200  | -16.23766600 | -9.87382300 L  |
| C-C_R | 2.01642600   | -14.80938700 | -8.77161400 L  |
| H-H_  | 0.63986100   | -13.34845800 | -9.53879300 L  |
| H-H_  | -0.81403900  | -17.37163500 | -9.33348600 L  |
| C-C_R | 1.19430600   | -17.06043100 | -8.63664900 L  |
| C-C_R | -5.05153800  | -16.49991800 | -8.50752400 L  |
| H-H_  | -4.08813100  | -16.31398100 | -6.59051900 L  |
| H-H_  | -5.73502400  | -16.45660100 | -10.53545500 L |
| H-H_  | 2.80516500   | -14.08314500 | -8.61557200 L  |
| C-C_R | 2.22068800   | -16.14327000 | -8.43837900 L  |
| H-H_  | 1.34029500   | -18.10576300 | -8.39003300 L  |
| C-C_R | -6.33480600  | -17.02311700 | -8.00627500 L  |
| H-H_  | 3.17156900   | -16.46619000 | -8.03219600 L  |
| N-N_R | -7.40793200  | -16.59901500 | -8.65462800 L  |
| C-C_R | -6.47953600  | -17.89640000 | -6.87964300 L  |
| C-C_R | -8.61487800  | -16.90106400 | -8.17538600 L  |
| N-N_R | -7.66909300  | -18.11912100 | -6.35416600 L  |
| C-C_R | -5.36948000  | -18.63648800 | -6.24687500 L  |
| C-C_R | -8.75421700  | -17.60486800 | -6.95398200 L  |
| C-C_R | -9.79404200  | -16.48073100 | -8.86165800 L  |
| C-C_R | -4.30358600  | -19.16379500 | -6.98328600 L  |
| C-C_R | -5.41764400  | -18.89897400 | -4.87518100 L  |
| C-C_R | -10.04408200 | -17.81762500 | -6.39266900 L  |
| C-C_R | -11.03303000 | -16.71877500 | -8.31130500 L  |
| C-C_R | -9.67661300  | -15.78112800 | -10.09843500 L |
| C-C_R | -3.30878500  | -19.89996200 | -6.36848900 L  |
| H-H_  | -4.26445900  | -19.02094200 | -8.05557000 L  |
| H-H_  | -6.25753600  | -18.52506500 | -4.30271700 L  |
| C-C_R | -4.41353800  | -19.61394400 | -4.24821400 L  |
| C-C_R | -11.19371500 | -17.35291100 | -7.06049700 L  |
| C-C_R | -10.12282200 | -18.56786800 | -5.18847800 L  |
| H-H_  | -11.91128300 | -16.36423600 | -8.83432800 L  |
| N-N_R | -9.60713300  | -15.20968700 | -11.10278000 L |
| H-H_  | -2.50140400  | -20.31866300 | -6.95640500 L  |
| C-C_R | -3.33836600  | -20.12051000 | -4.98758000 L  |
| H-H_  | -4.45478100  | -19.78264700 | -3.17957600 L  |
| N-N_R | -10.18887800 | -19.18213900 | -4.20664700 L  |
| N-N_R | -2.31198800  | -20.84287600 | -4.35950200 L  |
| C-C_R | -0.97531400  | -20.66983000 | -4.77339000 L  |



|       |              |              |                |
|-------|--------------|--------------|----------------|
| C-C_R | -2.60773300  | -21.72359900 | -3.29902900 L  |
| C-C_R | -0.48795000  | -19.39747400 | -5.07910500 L  |
| C-C_R | -0.11897600  | -21.76940700 | -4.87660800 L  |
| C-C_R | -1.77708100  | -21.78327000 | -2.17745000 L  |
| C-C_R | -3.73611000  | -22.54502500 | -3.35714600 L  |
| H-H_  | -1.14679800  | -18.54080800 | -4.99302500 L  |
| C-C_R | 0.82796400   | -19.23104500 | -5.48449400 L  |
| H-H_  | -0.49529100  | -22.75862500 | -4.64606700 L  |
| C-C_R | 1.19962900   | -21.59306200 | -5.26993800 L  |
| H-H_  | -0.90563000  | -21.14208400 | -2.12515900 L  |
| C-C_R | -2.06811700  | -22.65739200 | -1.14045600 L  |
| H-H_  | -4.38027900  | -22.50488400 | -4.22656700 L  |
| C-C_R | -4.02871900  | -23.40151700 | -2.30626900 L  |
| H-H_  | 1.18904800   | -18.23538800 | -5.71427800 L  |
| C-C_R | 1.68014900   | -20.32561300 | -5.57913000 L  |
| H-H_  | 1.85068700   | -22.45510500 | -5.34546300 L  |
| C-C_R | -3.19685700  | -23.46808600 | -1.19545800 L  |
| H-H_  | -1.41512800  | -22.69263100 | -0.27661900 L  |
| H-H_  | -4.90862600  | -24.03023400 | -2.36526800 L  |
| H-H_  | 2.71130200   | -20.19213000 | -5.88658300 L  |
| H-H_  | -3.42535000  | -24.14338100 | -0.37870600 L  |
| C-C_R | -20.51818700 | 16.56309600  | -8.35083200 L  |
| H-H_  | -19.57069100 | 16.04133400  | -8.40836900 L  |
| C-C_R | -22.57698300 | 17.27725500  | -9.37132800 L  |
| H-H_  | -23.22962900 | 17.33152100  | -10.23421900 L |
| C-C_R | -21.35839600 | 16.61094800  | -9.45848500 L  |
| H-H_  | -21.06324900 | 16.13422400  | -10.38690000 L |
| C-C_R | -20.88812100 | 17.16842200  | -7.16244900 L  |
| C-C_R | -22.11197800 | 17.84250900  | -7.07446000 L  |
| H-H_  | -20.24258300 | 17.11748200  | -6.29515100 L  |
| N-N_R | -22.48659300 | 18.46844400  | -5.87287400 L  |
| C-C_R | -22.95535100 | 17.89426100  | -8.19174600 L  |
| C-C_R | -21.52280800 | 19.13002500  | -5.09828800 L  |
| C-C_R | -23.82529200 | 18.44116100  | -5.44903300 L  |
| H-H_  | -23.89344900 | 18.43395800  | -8.12941000 L  |
| C-C_R | -21.55261200 | 19.03258500  | -3.70172200 L  |
| C-C_R | -20.51400100 | 19.88367400  | -5.71186900 L  |
| C-C_R | -24.60031500 | 17.28891700  | -5.62477300 L  |
| C-C_R | -24.39307800 | 19.56955000  | -4.84505500 L  |
| H-H_  | -22.30320000 | 18.41053500  | -3.22504100 L  |
| C-C_R | -20.61090200 | 19.69483300  | -2.94100300 L  |
| H-H_  | -20.48569000 | 19.96265400  | -6.79265300 L  |
| C-C_R | -19.57184500 | 20.53386300  | -4.94133200 L  |
| C-C_R | -25.92147900 | 17.27490200  | -5.20671800 L  |

|       |              |             |               |
|-------|--------------|-------------|---------------|
| H-H_  | -24.15578500 | 16.40891300 | -6.07379600 L |
| H-H_  | -23.79739900 | 20.46462500 | -4.72273500 L |
| C-C_R | -25.71371700 | 19.54041800 | -4.42654400 L |
| C-C_R | -19.61693100 | 20.47313100 | -3.54492200 L |
| H-H_  | -20.62936300 | 19.59131100 | -1.86280100 L |
| H-H_  | -18.77734800 | 21.10225300 | -5.40972600 L |
| H-H_  | -26.50998600 | 16.37413100 | -5.33972000 L |
| C-C_R | -26.48401900 | 18.39592000 | -4.60755000 L |
| H-H_  | -26.14326100 | 20.42191000 | -3.96741000 L |
| C-C_R | -18.56374600 | 21.15460200 | -2.75780100 L |
| H-H_  | -27.51714200 | 18.37831300 | -4.28316100 L |
| N-N_R | -17.36192900 | 21.10762600 | -3.31707700 L |
| C-C_R | -18.76130800 | 21.75812600 | -1.49428900 L |
| C-C_R | -16.30969600 | 21.54976200 | -2.61886000 L |
| N-N_R | -17.70609100 | 22.11712600 | -0.75938900 L |
| C-C_R | -20.07449400 | 22.07585500 | -0.90550700 L |
| C-C_R | -16.49151700 | 21.99401500 | -1.27831000 L |
| C-C_R | -15.00983500 | 21.53043700 | -3.19903700 L |
| C-C_R | -21.16358100 | 22.48841100 | -1.68161000 L |
| C-C_R | -20.23052700 | 22.04006700 | 0.48511700 L  |
| C-C_R | -15.33365100 | 22.33885300 | -0.50831600 L |
| C-C_R | -13.88659700 | 21.92108900 | -2.43618500 L |
| C-C_R | -14.89331500 | 21.03718500 | -4.52510600 L |
| C-C_R | -22.37397000 | 22.81330500 | -1.09877100 L |
| H-H_  | -21.05200200 | 22.59056600 | -2.75450800 L |
| H-H_  | -19.38063400 | 21.76006900 | 1.09538900 L  |
| C-C_R | -21.43948400 | 22.35314100 | 1.07578000 L  |
| C-C_R | -14.08365900 | 22.28584500 | -1.09063200 L |
| C-C_R | -15.49207900 | 22.77245600 | 0.83601900 L  |
| N-N_R | -14.80926000 | 20.63362900 | -5.60954200 L |
| H-H_  | -23.20096700 | 23.15443300 | -1.70894400 L |
| C-C_R | -22.53255200 | 22.73542000 | 0.28955700 L  |
| H-H_  | -21.54967800 | 22.29791800 | 2.15248300 L  |
| H-H_  | -13.22683500 | 22.58351500 | -0.50051000 L |
| N-N_R | -15.60643500 | 23.12743500 | 1.93274800 L  |
| N-N_R | -23.76572700 | 23.05451900 | 0.88199600 L  |
| C-C_R | -24.96213100 | 22.62254400 | 0.28123300 L  |
| C-C_R | -23.80231400 | 23.80041700 | 2.07667700 L  |
| C-C_R | -25.04649200 | 21.34588500 | -0.28258400 L |
| C-C_R | -26.08289700 | 23.45896400 | 0.24349500 L  |
| C-C_R | -24.72427600 | 23.48756800 | 3.07877100 L  |
| C-C_R | -22.90992400 | 24.85910100 | 2.27222800 L  |
| H-H_  | -24.18515500 | 20.69053600 | -0.24371900 L |
| C-C_R | -26.22707600 | 20.92030100 | -0.87173300 L |

|       |              |             |               |
|-------|--------------|-------------|---------------|
| H-H_  | -26.01810500 | 24.45226700 | 0.67077900 L  |
| C-C_R | -27.26000100 | 23.01994600 | -0.34102300 L |
| H-H_  | -25.40736400 | 22.65891300 | 2.93668100 L  |
| C-C_R | -24.75373200 | 24.22800200 | 4.25073000 L  |
| H-H_  | -22.19927300 | 25.10844100 | 1.49414900 L  |
| C-C_R | -22.93976300 | 25.58247100 | 3.45349500 L  |
| H-H_  | -26.27865500 | 19.92166000 | -1.29160600 L |
| C-C_R | -27.34159600 | 21.75024800 | -0.90313800 L |
| H-H_  | -28.11952500 | 23.68188800 | -0.36515000 L |
| C-C_R | -23.86195300 | 25.27551200 | 4.44714800 L  |
| H-H_  | -25.47017800 | 23.97210800 | 5.02214100 L  |
| H-H_  | -22.24028700 | 26.39995400 | 3.59232500 L  |
| H-H_  | -28.26566700 | 21.41182500 | -1.35427100 L |
| H-H_  | -23.88323400 | 25.84687600 | 5.36847300 L  |
| C-C_R | -3.82533900  | 27.32188600 | -8.13867000 L |
| H-H_  | -4.57886800  | 28.10207000 | -8.15233000 L |
| C-C_R | -1.92337500  | 26.23921800 | -9.12234500 L |
| H-H_  | -1.19130000  | 26.15799600 | -9.91640300 L |
| C-C_R | -2.88677500  | 27.24099200 | -9.16018400 L |
| H-H_  | -2.90565400  | 27.95132900 | -9.97982000 L |
| C-C_R | -3.80123600  | 26.42170500 | -7.08522900 L |
| C-C_R | -2.84040800  | 25.40720800 | -7.05169600 L |
| H-H_  | -4.52699100  | 26.49436400 | -6.28404800 L |
| N-N_R | -2.81746300  | 24.48365700 | -5.98657300 L |
| C-C_R | -1.90169600  | 25.32126900 | -8.08277700 L |
| C-C_R | -4.01870900  | 23.96169200 | -5.47968300 L |
| C-C_R | -1.58472900  | 24.06509200 | -5.44622300 L |
| H-H_  | -1.16084800  | 24.53206800 | -8.06393100 L |
| C-C_R | -4.17143700  | 23.74267000 | -4.10588200 L |
| C-C_R | -5.08409500  | 23.65573700 | -6.33272100 L |
| C-C_R | -0.55347000  | 24.98658000 | -5.23949700 L |
| C-C_R | -1.37524300  | 22.72462800 | -5.11570800 L |
| H-H_  | -3.36735600  | 24.00980100 | -3.43211000 L |
| C-C_R | -5.34312200  | 23.20442800 | -3.60688100 L |
| H-H_  | -4.98278900  | 23.82402000 | -7.39675500 L |
| C-C_R | -6.26047300  | 23.13830900 | -5.82250600 L |
| C-C_R | 0.66224500   | 24.56658900 | -4.72029700 L |
| H-H_  | -0.71435400  | 26.02851200 | -5.48737400 L |
| H-H_  | -2.16825400  | 22.00533500 | -5.28206600 L |
| C-C_R | -0.15991000  | 22.31653900 | -4.58523000 L |
| C-C_R | -6.40575300  | 22.87705200 | -4.45610500 L |
| H-H_  | -5.44231200  | 23.06199500 | -2.53920100 L |
| H-H_  | -7.08920500  | 22.91937500 | -6.48413800 L |
| H-H_  | 1.45095000   | 25.29382500 | -4.56415300 L |

|       |              |             |               |
|-------|--------------|-------------|---------------|
| C-C_R | 0.86650700   | 23.23270600 | -4.38706200 L |
| H-H_  | -0.01392000  | 21.27120700 | -4.33861400 L |
| C-C_R | -7.68902100  | 22.35385300 | -3.95485500 L |
| H-H_  | 1.81735400   | 22.91078000 | -3.98077600 L |
| N-N_R | -8.76214700  | 22.77795500 | -4.60320900 L |
| C-C_R | -7.83375100  | 21.48057000 | -2.82822300 L |
| C-C_R | -9.96905900  | 22.47491200 | -4.12406900 L |
| N-N_R | -9.02330800  | 21.25784900 | -2.30274600 L |
| C-C_R | -6.72366100  | 20.73948800 | -2.19555800 L |
| C-C_R | -10.10843200 | 21.77210200 | -2.90256200 L |
| C-C_R | -11.14822300 | 22.89524500 | -4.81034100 L |
| C-C_R | -5.65776700  | 20.21218100 | -2.93196800 L |
| C-C_R | -6.77185900  | 20.47799600 | -0.82376200 L |
| C-C_R | -11.39829700 | 21.55934400 | -2.34125000 L |
| C-C_R | -12.38724500 | 22.65819500 | -4.25988600 L |
| C-C_R | -11.03082800 | 23.59584200 | -6.04701500 L |
| C-C_R | -4.66300100  | 19.47700800 | -2.31706900 L |
| H-H_  | -5.61867500  | 20.35602800 | -4.00415000 L |
| H-H_  | -7.61175100  | 20.85190500 | -0.25129700 L |
| C-C_R | -5.76775400  | 19.76302600 | -0.19679400 L |
| C-C_R | -12.54789600 | 22.02306500 | -3.00917900 L |
| C-C_R | -11.47703700 | 20.80910200 | -1.13705900 L |
| H-H_  | -13.26549900 | 23.01273400 | -4.78290900 L |
| N-N_R | -10.96131400 | 24.16628900 | -7.05146300 L |
| H-H_  | -3.85558500  | 19.05731300 | -2.90508700 L |
| C-C_R | -4.69258100  | 19.25646000 | -0.93616000 L |
| H-H_  | -5.80899600  | 19.59432300 | 0.87184400 L  |
| N-N_R | -11.54305900 | 20.19383700 | -0.15532900 L |
| N-N_R | -3.66620300  | 18.53409400 | -0.30808200 L |
| C-C_R | -2.32952900  | 18.70714000 | -0.72197000 L |
| C-C_R | -3.96194800  | 17.65337100 | 0.75239100 L  |
| C-C_R | -1.84216600  | 19.97949600 | -1.02768500 L |
| C-C_R | -1.47319200  | 17.60756300 | -0.82518900 L |
| C-C_R | -3.13126200  | 17.59270500 | 1.87386800 L  |
| C-C_R | -5.09032500  | 16.83194500 | 0.69427400 L  |
| H-H_  | -2.50097900  | 20.83516700 | -0.94170800 L |
| C-C_R | -0.52625100  | 20.14592500 | -1.43307500 L |
| H-H_  | -1.84947200  | 16.61735100 | -0.59475000 L |
| C-C_R | -0.15458600  | 17.78390800 | -1.21851900 L |
| H-H_  | -2.25984500  | 18.23488600 | 1.92626100 L  |
| C-C_R | -3.42233200  | 16.71957800 | 2.91096400 L  |
| H-H_  | -5.73449400  | 16.87208600 | -0.17514700 L |
| C-C_R | -5.38290000  | 15.97445900 | 1.74504800 L  |
| H-H_  | -0.16516700  | 21.14158200 | -1.66285800 L |

|       |             |              |                |
|-------|-------------|--------------|----------------|
| C-C_R | 0.32596800  | 19.05036300  | -1.52781300 L  |
| H-H_  | 0.49650600  | 16.92087100  | -1.29414600 L  |
| C-C_R | -4.55103800 | 15.90788900  | 2.85585900 L   |
| H-H_  | -2.76934300 | 16.68433900  | 3.77480100 L   |
| H-H_  | -6.26280700 | 15.34574200  | 1.68604900 L   |
| H-H_  | 1.35712100  | 19.18384600  | -1.83526500 L  |
| H-H_  | -4.77956500 | 15.23358900  | 3.67271300 L   |
| C-C_R | 10.72795200 | -21.77740300 | -12.48443700 L |
| H-H_  | 11.67544700 | -22.29916600 | -12.54197400 L |
| C-C_R | 8.66915600  | -21.06324400 | -13.50493300 L |
| H-H_  | 8.01651000  | -21.00897900 | -14.36782400 L |
| C-C_R | 9.88774200  | -21.72955200 | -13.59209000 L |
| H-H_  | 10.18285500 | -22.20528100 | -14.52040300 L |
| C-C_R | 10.35801700 | -21.17207800 | -11.29605400 L |
| C-C_R | 9.13412600  | -20.49699600 | -11.20796300 L |
| H-H_  | 11.00355600 | -21.22301800 | -10.42875600 L |
| N-N_R | 8.75954500  | -19.87205500 | -10.00647900 L |
| C-C_R | 8.29075300  | -20.44524500 | -12.32524900 L |
| C-C_R | 9.72433000  | -19.21044000 | -9.23189600 L  |
| C-C_R | 7.42081200  | -19.89834500 | -9.58253600 L  |
| H-H_  | 7.35368900  | -19.90650600 | -12.26301800 L |
| C-C_R | 9.69352600  | -19.30791400 | -7.83532700 L  |
| C-C_R | 10.73213800 | -18.45682600 | -9.84547400 L  |
| C-C_R | 6.64582300  | -21.05158200 | -9.75837800 L  |
| C-C_R | 6.85306000  | -18.77095000 | -8.97866000 L  |
| H-H_  | 8.94390300  | -19.92893500 | -7.35854600 L  |
| C-C_R | 10.63520200 | -18.64467200 | -7.07450600 L  |
| H-H_  | 10.76041400 | -18.37685200 | -10.92615600 L |
| C-C_R | 11.67529300 | -17.80660200 | -9.07494000 L  |
| C-C_R | 5.32465900  | -21.06559700 | -9.34032300 L  |
| H-H_  | 7.09031900  | -21.93059300 | -10.20729900 L |
| H-H_  | 7.44870500  | -17.87488000 | -8.85623800 L  |
| C-C_R | 5.53342100  | -18.80004700 | -8.56015200 L  |
| C-C_R | 11.62917300 | -17.86637400 | -7.67842500 L  |
| H-H_  | 10.61677500 | -18.74918800 | -5.99640600 L  |
| H-H_  | 12.46879000 | -17.23824600 | -9.54333100 L  |
| H-H_  | 4.73615200  | -21.96636800 | -9.47332500 L  |
| C-C_R | 4.76208500  | -19.94358500 | -8.74105300 L  |
| H-H_  | 5.10287700  | -17.91859000 | -8.10101500 L  |
| C-C_R | 12.68239200 | -17.18589800 | -6.89140600 L  |
| H-H_  | 3.72899600  | -19.96218600 | -8.41676600 L  |
| N-N_R | 13.88420900 | -17.23287400 | -7.45068200 L  |
| C-C_R | 12.48483000 | -16.58237400 | -5.62789500 L  |
| C-C_R | 14.93644300 | -16.79073800 | -6.75246500 L  |

|       |             |              |               |
|-------|-------------|--------------|---------------|
| N-N_R | 13.54004700 | -16.22337300 | -4.89299400 L |
| C-C_R | 11.17164400 | -16.26464500 | -5.03911200 L |
| C-C_R | 14.75462200 | -16.34648500 | -5.41191500 L |
| C-C_R | 16.23630400 | -16.81006200 | -7.33264200 L |
| C-C_R | 10.08252300 | -15.85109400 | -5.81511200 L |
| C-C_R | 11.01557700 | -16.29943800 | -3.64838600 L |
| C-C_R | 15.91245300 | -16.00065300 | -4.64181900 L |
| C-C_R | 17.35950700 | -16.41841600 | -6.56968800 L |
| C-C_R | 16.35282300 | -17.30331500 | -8.65871100 L |
| C-C_R | 8.87316800  | -15.52716000 | -5.23237900 L |
| H-H_  | 10.19413700 | -15.74993300 | -6.88811300 L |
| H-H_  | 11.86547000 | -16.57943600 | -3.03811400 L |
| C-C_R | 9.80665500  | -15.98735800 | -3.05782500 L |
| C-C_R | 17.16244500 | -16.05366000 | -5.22413500 L |
| C-C_R | 15.75406000 | -15.56804400 | -3.29758600 L |
| N-N_R | 16.43687800 | -17.70687000 | -9.74314700 L |
| H-H_  | 8.04613600  | -15.18503800 | -5.84244900 L |
| C-C_R | 8.71358700  | -15.60508000 | -3.84404900 L |
| H-H_  | 9.69642600  | -16.04158800 | -1.98102000 L |
| H-H_  | 18.01930400 | -15.75698500 | -4.63411600 L |
| N-N_R | 15.63966900 | -15.21207100 | -2.20075400 L |
| N-N_R | 7.48041200  | -15.28598100 | -3.25160900 L |
| C-C_R | 6.28397300  | -15.71696100 | -3.85226900 L |
| C-C_R | 7.44379000  | -14.53908800 | -2.05682600 L |
| C-C_R | 6.19964700  | -16.99461500 | -4.41619000 L |
| C-C_R | 5.16324100  | -14.88153600 | -3.89011000 L |
| C-C_R | 6.52182800  | -14.85193800 | -1.05473100 L |
| C-C_R | 8.33621500  | -13.48139900 | -1.86137700 L |
| H-H_  | 7.06098400  | -17.64996300 | -4.37732400 L |
| C-C_R | 5.01906200  | -17.42019900 | -5.00533800 L |
| H-H_  | 5.22803400  | -13.88823300 | -3.46282600 L |
| C-C_R | 3.98710200  | -15.31952400 | -4.47452900 L |
| H-H_  | 5.83877400  | -15.68158600 | -1.19692400 L |
| C-C_R | 6.49240600  | -14.11249700 | 0.11712500 L  |
| H-H_  | 9.04686600  | -13.23205900 | -2.63945600 L |
| C-C_R | 8.30634100  | -12.75703500 | -0.68000800 L |
| H-H_  | 4.96748300  | -18.41883900 | -5.42521200 L |
| C-C_R | 3.90454200  | -16.59025100 | -5.03674400 L |
| H-H_  | 3.12761300  | -14.65857700 | -4.49875700 L |
| C-C_R | 7.38415100  | -13.06399400 | 0.31364600 L  |
| H-H_  | 5.77596000  | -14.36839100 | 0.88853600 L  |
| H-H_  | 9.00585200  | -11.94054600 | -0.54128000 L |
| H-H_  | 2.98047100  | -16.92867400 | -5.48787600 L |
| H-H_  | 7.36290500  | -12.49362300 | 1.23486800 L  |

|       |             |              |                |
|-------|-------------|--------------|----------------|
| C-C_R | 27.42076500 | -11.01762000 | -12.27217200 L |
| H-H_  | 26.66727100 | -10.23842900 | -12.28593500 L |
| C-C_R | 29.32276400 | -12.10128200 | -13.25595000 L |
| H-H_  | 30.05483900 | -12.18250300 | -14.05000800 L |
| C-C_R | 28.35932900 | -11.09851300 | -13.29368700 L |
| H-H_  | 28.34048400 | -10.38917100 | -14.11342500 L |
| C-C_R | 27.44490200 | -11.91879500 | -11.21883400 L |
| C-C_R | 28.40569600 | -12.93229700 | -11.18519900 L |
| H-H_  | 26.71911300 | -11.84514200 | -10.41755000 L |
| N-N_R | 28.42867500 | -13.85684300 | -10.12017900 L |
| C-C_R | 29.34440900 | -13.01823600 | -12.21628000 L |
| C-C_R | 27.22742900 | -14.37880700 | -9.61328800 L  |
| C-C_R | 29.66137500 | -14.27441400 | -9.57972600 L  |
| H-H_  | 30.08529100 | -13.80843100 | -12.19753600 L |
| C-C_R | 27.07470200 | -14.59783000 | -8.23948700 L  |
| C-C_R | 26.16204400 | -14.68476200 | -10.46632700 L |
| C-C_R | 30.69266800 | -13.35391900 | -9.37310200 L  |
| C-C_R | 29.87089500 | -15.61587200 | -9.24931300 L  |
| H-H_  | 27.87874800 | -14.32970400 | -7.56561300 L  |
| C-C_R | 25.90401600 | -15.13603700 | -7.74048900 L  |
| H-H_  | 26.26331600 | -14.51548500 | -11.53025800 L |
| C-C_R | 24.98563100 | -15.20119600 | -9.95600900 L  |
| C-C_R | 31.90834900 | -13.77291700 | -8.85379900 L  |
| H-H_  | 30.53178400 | -12.31198800 | -9.62097900 L  |
| H-H_  | 29.07788400 | -16.33516400 | -9.41567200 L  |
| C-C_R | 31.08622900 | -16.02396100 | -8.71883500 L  |
| C-C_R | 24.84038500 | -15.46344800 | -8.58971000 L  |
| H-H_  | 25.80379200 | -15.27751000 | -6.67270400 L  |
| H-H_  | 24.15689900 | -15.42013100 | -10.61764100 L |
| H-H_  | 32.69708800 | -13.04667500 | -8.69775800 L  |
| C-C_R | 32.11261200 | -15.10679900 | -8.52056500 L  |
| H-H_  | 31.23221900 | -17.06929300 | -8.47221900 L  |
| C-C_R | 23.55711800 | -15.98664700 | -8.08846000 L  |
| H-H_  | 33.06449200 | -15.42968500 | -8.11438400 L  |
| N-N_R | 22.48399100 | -15.56254500 | -8.73681400 L  |
| C-C_R | 23.41238800 | -16.85993000 | -6.96182800 L  |
| C-C_R | 21.27704500 | -15.86459300 | -8.25757200 L  |
| N-N_R | 22.22283000 | -17.08265000 | -6.43635100 L  |
| C-C_R | 24.52244300 | -17.60001800 | -6.32906100 L  |
| C-C_R | 21.13770600 | -16.56839800 | -7.03616700 L  |
| C-C_R | 20.09788100 | -15.44426000 | -8.94384400 L  |
| C-C_R | 25.58933600 | -18.12728900 | -7.06547400 L  |
| C-C_R | 24.47427900 | -17.86250300 | -4.95736700 L  |
| C-C_R | 19.84784200 | -16.78115500 | -6.47485500 L  |

|       |             |              |                |
|-------|-------------|--------------|----------------|
| C-C_R | 18.85889400 | -15.68230500 | -8.39349100 L  |
| C-C_R | 20.21531000 | -14.74465700 | -10.18062100 L |
| C-C_R | 26.58313800 | -18.86349200 | -6.45067400 L  |
| H-H_  | 25.62746400 | -17.98447100 | -8.13775500 L  |
| H-H_  | 23.63438800 | -17.48859500 | -4.38490200 L  |
| C-C_R | 25.47838500 | -18.57747400 | -4.33039900 L  |
| C-C_R | 18.69920700 | -16.31640600 | -7.14268500 L  |
| C-C_R | 19.76910100 | -17.53139800 | -5.27066400 L  |
| H-H_  | 17.98064000 | -15.32776600 | -8.91651400 L  |
| N-N_R | 20.28479100 | -14.17321600 | -11.18496600 L |
| H-H_  | 27.39052000 | -19.28219300 | -7.03859000 L  |
| C-C_R | 26.55355700 | -19.08404000 | -5.06976500 L  |
| H-H_  | 25.43814200 | -18.74614200 | -3.26176400 L  |
| N-N_R | 19.70304500 | -18.14566800 | -4.28883200 L  |
| N-N_R | 27.57993500 | -19.80640600 | -4.44168700 L  |
| C-C_R | 28.91660900 | -19.63335900 | -4.85557500 L  |
| C-C_R | 27.28419000 | -20.68712800 | -3.38121500 L  |
| C-C_R | 29.40397300 | -18.36100400 | -5.16129000 L  |
| C-C_R | 29.77294700 | -20.73293600 | -4.95879400 L  |
| C-C_R | 28.11584100 | -20.74676500 | -2.25963800 L  |
| C-C_R | 26.15581300 | -21.50855500 | -3.43933200 L  |
| H-H_  | 28.74512500 | -17.50433800 | -5.07521000 L  |
| C-C_R | 30.71988700 | -18.19457500 | -5.56668000 L  |
| H-H_  | 29.39663200 | -21.72215400 | -4.72825300 L  |
| C-C_R | 31.09155200 | -20.55659100 | -5.35212400 L  |
| H-H_  | 28.98629300 | -20.10561300 | -2.20734500 L  |
| C-C_R | 27.82380600 | -21.62092100 | -1.22264100 L  |
| H-H_  | 25.51164400 | -21.46841400 | -4.30875200 L  |
| C-C_R | 25.86320400 | -22.36504700 | -2.38845400 L  |
| H-H_  | 31.08097100 | -17.19891700 | -5.79646300 L  |
| C-C_R | 31.57207200 | -19.28914300 | -5.66131600 L  |
| H-H_  | 31.74261000 | -21.41863400 | -5.42764900 L  |
| C-C_R | 26.69606500 | -22.43158100 | -1.27764600 L  |
| H-H_  | 28.47679600 | -21.65616100 | -0.35880500 L  |
| H-H_  | 24.98329700 | -22.99376400 | -2.44745400 L  |
| H-H_  | 32.60322500 | -19.15566000 | -5.96876800 L  |
| H-H_  | 26.46657300 | -23.10691100 | -0.46089200 L  |
| C-C_R | 9.37373700  | 17.59956700  | -8.43301700 L  |
| H-H_  | 10.32123200 | 17.07780400  | -8.49055500 L  |
| C-C_R | 7.31494000  | 18.31372600  | -9.45351400 L  |
| H-H_  | 6.66229500  | 18.36799100  | -10.31640500 L |
| C-C_R | 8.53352700  | 17.64741800  | -9.54067100 L  |
| H-H_  | 8.82867400  | 17.17069400  | -10.46908500 L |
| C-C_R | 9.00380200  | 18.20489200  | -7.24463500 L  |



|       |             |             |               |
|-------|-------------|-------------|---------------|
| C-C_R | 7.77994500  | 18.87898000 | -7.15664500 L |
| H-H_  | 9.64934100  | 18.15395200 | -6.37733600 L |
| N-N_R | 7.40533000  | 19.50491500 | -5.95505900 L |
| C-C_R | 6.93657200  | 18.93073100 | -8.27393100 L |
| C-C_R | 8.37011400  | 20.16653000 | -5.18047600 L |
| C-C_R | 6.06663100  | 19.47763100 | -5.53121900 L |
| H-H_  | 5.99947400  | 19.47046300 | -8.21159900 L |
| C-C_R | 8.33931100  | 20.06905600 | -3.78390800 L |
| C-C_R | 9.37792200  | 20.92014400 | -5.79405400 L |
| C-C_R | 5.29160800  | 18.32538800 | -5.70695800 L |
| C-C_R | 5.49884500  | 20.60602000 | -4.92724000 L |
| H-H_  | 7.58972200  | 19.44704000 | -3.30722900 L |
| C-C_R | 9.28102100  | 20.73130400 | -3.02318900 L |
| H-H_  | 9.40623300  | 20.99912400 | -6.87483800 L |
| C-C_R | 10.32107800 | 21.57036800 | -5.02352000 L |
| C-C_R | 3.97044400  | 18.31137300 | -5.28890300 L |
| H-H_  | 5.73613800  | 17.44538300 | -6.15598200 L |
| H-H_  | 6.09452400  | 21.50109600 | -4.80492100 L |
| C-C_R | 4.17920600  | 20.57692300 | -4.50873300 L |
| C-C_R | 10.27499200 | 21.50960200 | -3.62710800 L |
| H-H_  | 9.26256000  | 20.62778200 | -1.94498600 L |
| H-H_  | 11.11457500 | 22.13872400 | -5.49191200 L |
| H-H_  | 3.38193700  | 17.41060200 | -5.42190500 L |
| C-C_R | 3.40790400  | 19.43239000 | -4.68973500 L |
| H-H_  | 3.74866200  | 21.45838000 | -4.04959500 L |
| C-C_R | 11.32817700 | 22.19107200 | -2.83998600 L |
| H-H_  | 2.37478100  | 19.41478400 | -4.36534700 L |
| N-N_R | 12.52999400 | 22.14409600 | -3.39926300 L |
| C-C_R | 11.13061500 | 22.79459600 | -1.57647500 L |
| C-C_R | 13.58222700 | 22.58623200 | -2.70104500 L |
| N-N_R | 12.18583200 | 23.15359700 | -0.84157500 L |
| C-C_R | 9.81742900  | 23.11232500 | -0.98769200 L |
| C-C_R | 13.40040600 | 23.03048500 | -1.36049500 L |
| C-C_R | 14.88208800 | 22.56690800 | -3.28122300 L |
| C-C_R | 8.72834200  | 23.52488100 | -1.76379500 L |
| C-C_R | 9.66139600  | 23.07653800 | 0.40293100 L  |
| C-C_R | 14.55827200 | 23.37532300 | -0.59050200 L |
| C-C_R | 16.00532600 | 22.95756000 | -2.51837000 L |
| C-C_R | 14.99860800 | 22.07365500 | -4.60729200 L |
| C-C_R | 7.51895300  | 23.84981000 | -1.18096000 L |
| H-H_  | 8.83992200  | 23.62703700 | -2.83669400 L |
| H-H_  | 10.51128900 | 22.79653900 | 1.01320400 L  |
| C-C_R | 8.45244000  | 23.38961200 | 0.99359500 L  |
| C-C_R | 15.80826400 | 23.32231600 | -1.17281700 L |

|       |             |             |                |
|-------|-------------|-------------|----------------|
| C-C_R | 14.39984500 | 23.80892600 | 0.75383400 L   |
| N-N_R | 15.08266300 | 21.67010000 | -5.69172700 L  |
| H-H_  | 6.69195500  | 24.19093800 | -1.79113200 L  |
| C-C_R | 7.35937200  | 23.77189000 | 0.20737100 L   |
| H-H_  | 8.34224500  | 23.33438800 | 2.07029800 L   |
| H-H_  | 16.66508900 | 23.61998500 | -0.58269600 L  |
| N-N_R | 14.28548800 | 24.16390500 | 1.85056300 L   |
| N-N_R | 6.12619600  | 24.09098900 | 0.79981100 L   |
| C-C_R | 4.92979200  | 23.65901500 | 0.19904800 L   |
| C-C_R | 6.08960900  | 24.83688800 | 1.99449100 L   |
| C-C_R | 4.84543200  | 22.38235500 | -0.36477000 L  |
| C-C_R | 3.80902600  | 24.49543400 | 0.16130900 L   |
| C-C_R | 5.16764700  | 24.52403800 | 2.99658600 L   |
| C-C_R | 6.98199900  | 25.89557100 | 2.19004300 L   |
| H-H_  | 5.70676900  | 21.72700700 | -0.32590400 L  |
| C-C_R | 3.66484700  | 21.95677100 | -0.95391900 L  |
| H-H_  | 3.87381900  | 25.48873700 | 0.58859400 L   |
| C-C_R | 2.63292100  | 24.05645100 | -0.42321100 L  |
| H-H_  | 4.48455900  | 23.69538400 | 2.85449500 L   |
| C-C_R | 5.13819100  | 25.26447300 | 4.16854500 L   |
| H-H_  | 7.69265100  | 26.14491100 | 1.41196400 L   |
| C-C_R | 6.95216000  | 26.61894100 | 3.37131000 L   |
| H-H_  | 3.61326800  | 20.95813100 | -1.37379200 L  |
| C-C_R | 2.55032700  | 22.78671900 | -0.98532400 L  |
| H-H_  | 1.77339700  | 24.71839300 | -0.44733800 L  |
| C-C_R | 6.02997000  | 26.31198200 | 4.36496300 L   |
| H-H_  | 4.42174500  | 25.00857900 | 4.93995500 L   |
| H-H_  | 7.65163600  | 27.43642400 | 3.51014000 L   |
| H-H_  | 1.62625600  | 22.44829600 | -1.43645600 L  |
| H-H_  | 6.00869000  | 26.88334700 | 5.28628700 L   |
| C-C_R | 26.06658400 | 28.35835600 | -8.22085500 L  |
| H-H_  | 25.31305600 | 29.13854100 | -8.23451600 L  |
| C-C_R | 27.96854800 | 27.27568800 | -9.20453100 L  |
| H-H_  | 28.70062400 | 27.19446700 | -9.99858900 L  |
| C-C_R | 27.00514800 | 28.27746300 | -9.24237000 L  |
| H-H_  | 26.98626900 | 28.98779900 | -10.06200500 L |
| C-C_R | 26.09068700 | 27.45817500 | -7.16741400 L  |
| C-C_R | 27.05151500 | 26.44367900 | -7.13388100 L  |
| H-H_  | 25.36493200 | 27.53083400 | -6.36623300 L  |
| N-N_R | 27.07446000 | 25.52012700 | -6.06875900 L  |
| C-C_R | 27.99022800 | 26.35774000 | -8.16496200 L  |
| C-C_R | 25.87321400 | 24.99816300 | -5.56186800 L  |
| C-C_R | 28.30719400 | 25.10156200 | -5.52840900 L  |
| H-H_  | 28.73107500 | 25.56853900 | -8.14611600 L  |

|       |             |             |               |
|-------|-------------|-------------|---------------|
| C-C_R | 25.72048700 | 24.77914000 | -4.18806800 L |
| C-C_R | 24.80782900 | 24.69220800 | -6.41490700 L |
| C-C_R | 29.33845300 | 26.02305100 | -5.32168200 L |
| C-C_R | 28.51668000 | 23.76109800 | -5.19789300 L |
| H-H_  | 26.52456700 | 25.04627100 | -3.51429500 L |
| C-C_R | 24.54980100 | 24.24093300 | -3.68906900 L |
| H-H_  | 24.90913500 | 24.86049100 | -7.47894100 L |
| C-C_R | 23.63145000 | 24.17478000 | -5.90469200 L |
| C-C_R | 30.55416800 | 25.60305900 | -4.80248200 L |
| H-H_  | 29.17756900 | 27.06498200 | -5.56955900 L |
| H-H_  | 27.72366900 | 23.04180600 | -5.36425200 L |
| C-C_R | 29.73201400 | 23.35300900 | -4.66741500 L |
| C-C_R | 23.48617000 | 23.91352200 | -4.53829000 L |
| H-H_  | 24.44961100 | 24.09846600 | -2.62138700 L |
| H-H_  | 22.80271800 | 23.95584500 | -6.56632300 L |
| H-H_  | 31.34287300 | 26.33029500 | -4.64633800 L |
| C-C_R | 30.75843100 | 24.26917600 | -4.46924700 L |
| H-H_  | 29.87800300 | 22.30767700 | -4.42079900 L |
| C-C_R | 22.20290200 | 23.39032300 | -4.03704100 L |
| H-H_  | 31.71027700 | 23.94728500 | -4.06296400 L |
| N-N_R | 21.12977600 | 23.81442500 | -4.68539400 L |
| C-C_R | 22.05817200 | 22.51704000 | -2.91040900 L |
| C-C_R | 19.92286400 | 23.51138200 | -4.20625500 L |
| N-N_R | 20.86861500 | 22.29432000 | -2.38493200 L |
| C-C_R | 23.16826200 | 21.77595800 | -2.27774400 L |
| C-C_R | 19.78349100 | 22.80857200 | -2.98474800 L |
| C-C_R | 18.74370000 | 23.93171500 | -4.89252600 L |
| C-C_R | 24.23515500 | 21.24868600 | -3.01415700 L |
| C-C_R | 23.12006400 | 21.51446700 | -0.90594700 L |
| C-C_R | 18.49362600 | 22.59581500 | -2.42343500 L |
| C-C_R | 17.50467800 | 23.69466500 | -4.34207100 L |
| C-C_R | 18.86109500 | 24.63231300 | -6.12920100 L |
| C-C_R | 25.22892300 | 20.51347800 | -2.39925500 L |
| H-H_  | 24.27324900 | 21.39249900 | -4.08633600 L |
| H-H_  | 22.28017200 | 21.88837500 | -0.33348300 L |
| C-C_R | 24.12417000 | 20.79949600 | -0.27898000 L |
| C-C_R | 17.34502600 | 23.05957000 | -3.09136800 L |
| C-C_R | 18.41488600 | 21.84557200 | -1.21924400 L |
| H-H_  | 16.62642500 | 24.04920400 | -4.86509400 L |
| N-N_R | 18.93061000 | 25.20276000 | -7.13364900 L |
| H-H_  | 26.03633900 | 20.09378300 | -2.98727300 L |
| C-C_R | 25.19934200 | 20.29293000 | -1.01834600 L |
| H-H_  | 24.08392600 | 20.63082800 | 0.78965500 L  |
| N-N_R | 18.34886400 | 21.23030700 | -0.23751500 L |

|       |              |             |               |
|-------|--------------|-------------|---------------|
| N-N_R | 26.22572000  | 19.57056400 | -0.39026700 L |
| C-C_R | 27.56239400  | 19.74361100 | -0.80415600 L |
| C-C_R | 25.92997500  | 18.68984200 | 0.67020500 L  |
| C-C_R | 28.04975800  | 21.01596600 | -1.10987100 L |
| C-C_R | 28.41873200  | 18.64403400 | -0.90737400 L |
| C-C_R | 26.76166000  | 18.62921100 | 1.79167900 L  |
| C-C_R | 24.80159800  | 17.86841500 | 0.61208800 L  |
| H-H_  | 27.39094400  | 21.87163800 | -1.02389300 L |
| C-C_R | 29.36567200  | 21.18239500 | -1.51526000 L |
| H-H_  | 28.04245100  | 17.65382100 | -0.67693600 L |
| C-C_R | 29.73733700  | 18.82037900 | -1.30070400 L |
| H-H_  | 27.63207800  | 19.27135700 | 1.84407500 L  |
| C-C_R | 26.46959100  | 17.75604900 | 2.82877800 L  |
| H-H_  | 24.15742900  | 17.90855600 | -0.25733300 L |
| C-C_R | 24.50902300  | 17.01092900 | 1.66286300 L  |
| H-H_  | 29.72675600  | 22.17805300 | -1.74504400 L |
| C-C_R | 30.21789100  | 20.08683300 | -1.60999800 L |
| H-H_  | 30.38842900  | 17.95734200 | -1.37633200 L |
| C-C_R | 25.34188400  | 16.94439500 | 2.77367100 L  |
| H-H_  | 27.12258000  | 17.72080900 | 3.69261500 L  |
| H-H_  | 23.62911600  | 16.38221200 | 1.60386400 L  |
| H-H_  | 31.24904400  | 20.22031600 | -1.91745100 L |
| H-H_  | 25.11235800  | 16.27005900 | 3.59052800 L  |
| C-C_R | -10.84591300 | 14.53465400 | 3.34468200 L  |
| H-H_  | -11.79338300 | 15.05600800 | 3.40619900 L  |
| C-C_R | -8.80093100  | 14.04528800 | 2.17573100 L  |
| H-H_  | -8.15818100  | 14.16835900 | 1.31173200 L  |
| C-C_R | -10.01966200 | 14.71394500 | 2.24000900 L  |
| H-H_  | -10.32573300 | 15.36799700 | 1.43148600 L  |
| C-C_R | -10.46194500 | 13.70096100 | 4.38056300 L  |
| C-C_R | -9.23791500  | 13.02363300 | 4.31435600 L  |
| H-H_  | -11.09653700 | 13.57378300 | 5.24811000 L  |
| N-N_R | -8.84816300  | 12.16811200 | 5.35901700 L  |
| C-C_R | -8.40762700  | 13.20110100 | 3.19941700 L  |
| C-C_R | -9.80404100  | 11.36157200 | 5.99598600 L  |
| C-C_R | -7.50420800  | 12.10942800 | 5.76270700 L  |
| H-H_  | -7.47055000  | 12.66215800 | 3.13917600 L  |
| C-C_R | -9.75668300  | 11.17334700 | 7.38173900 L  |
| C-C_R | -10.82140400 | 10.74712800 | 5.25372100 L  |
| C-C_R | -6.72999100  | 13.27522800 | 5.81619400 L  |
| C-C_R | -6.93140600  | 10.88354300 | 6.11777300 L  |
| H-H_  | -8.99937000  | 11.68553000 | 7.96535900 L  |
| C-C_R | -10.68862900 | 10.36807400 | 8.00461300 L  |
| H-H_  | -10.86326800 | 10.88827100 | 4.18076700 L  |

|       |              |             |               |
|-------|--------------|-------------|---------------|
| C-C_R | -11.75469700 | 9.95272900  | 5.88777300 L  |
| C-C_R | -5.40469900  | 13.20576600 | 6.21085300 L  |
| H-H_  | -7.17993600  | 14.22661500 | 5.55984000 L  |
| H-H_  | -7.52561800  | 9.98046000  | 6.06398700 L  |
| C-C_R | -5.60560800  | 10.82872200 | 6.51694900 L  |
| C-C_R | -11.69106100 | 9.72745000  | 7.26760800 L  |
| H-H_  | -10.65761300 | 10.25144000 | 9.08015200 L  |
| H-H_  | -12.55470900 | 9.49038600  | 5.32361200 L  |
| H-H_  | -4.81674500  | 14.11552400 | 6.25631800 L  |
| C-C_R | -4.83611800  | 11.98601300 | 6.56356000 L  |
| H-H_  | -5.17048900  | 9.87281100  | 6.78298500 L  |
| C-C_R | -12.73624700 | 8.89997100  | 7.91203800 L  |
| H-H_  | -3.79903800  | 11.93965800 | 6.87193600 L  |
| N-N_R | -13.94488700 | 9.05796500  | 7.39002000 L  |
| C-C_R | -12.52369800 | 8.05255600  | 9.02399200 L  |
| C-C_R | -14.98889200 | 8.48193300  | 7.99592100 L  |
| N-N_R | -13.56911500 | 7.55040000  | 9.68373000 L  |
| C-C_R | -11.20267100 | 7.62353700  | 9.51948500 L  |
| C-C_R | -14.79091500 | 7.77479300  | 9.21586100 L  |
| C-C_R | -16.29587000 | 8.61707600  | 7.44805100 L  |
| C-C_R | -10.12385500 | 7.37768800  | 8.66210500 L  |
| C-C_R | -11.03020500 | 7.37518500  | 10.88621200 L |
| C-C_R | -15.93848400 | 7.27824800  | 9.91401400 L  |
| C-C_R | -17.40996000 | 8.07713400  | 8.12947500 L  |
| C-C_R | -16.42730000 | 9.36926800  | 6.25242300 L  |
| C-C_R | -8.90773500  | 6.94365500  | 9.15171300 L  |
| H-H_  | -10.24898800 | 7.49651900  | 7.59241200 L  |
| H-H_  | -11.87105300 | 7.52428500  | 11.55120800 L |
| C-C_R | -9.81340500  | 6.95120400  | 11.38589600 L |
| C-C_R | -17.19658000 | 7.44683400  | 9.37027500 L  |
| C-C_R | -15.76487200 | 6.58169500  | 11.14022100 L |
| N-N_R | -16.52537900 | 9.98471300  | 5.27275300 L  |
| H-H_  | -8.08882400  | 6.73369200  | 8.47457500 L  |
| C-C_R | -8.73172900  | 6.73802100  | 10.52481400 L |
| H-H_  | -9.69066900  | 6.78561000  | 12.44979700 L |
| H-H_  | -18.04637800 | 7.03526100  | 9.89935000 L  |
| N-N_R | -15.63625100 | 6.01046200  | 12.14032200 L |
| N-N_R | -7.49166300  | 6.30678100  | 11.02461100 L |
| C-C_R | -6.30226600  | 6.85235400  | 10.50916100 L |
| C-C_R | -7.44108300  | 5.33274700  | 12.04215400 L |
| C-C_R | -6.22335000  | 8.21804500  | 10.21560600 L |
| C-C_R | -5.18316700  | 6.04348300  | 10.28836600 L |
| C-C_R | -6.50627300  | 5.43653200  | 13.07631500 L |
| C-C_R | -8.33235300  | 4.25626500  | 12.02974000 L |

|       |              |            |               |
|-------|--------------|------------|---------------|
| H-H_  | -7.08328800  | 8.85061800 | 10.39856900 L |
| C-C_R | -5.04967000  | 8.75597500 | 9.71052800 L  |
| H-H_  | -5.24389200  | 4.98399800 | 10.50568100 L |
| C-C_R | -4.01285700  | 6.59262600 | 9.79049300 L  |
| H-H_  | -5.82399100  | 6.27874200 | 13.09615400 L |
| C-C_R | -6.46316900  | 4.47444300 | 14.07301600 L |
| H-H_  | -9.05298300  | 4.16931500 | 11.22616400 L |
| C-C_R | -8.28865300  | 3.30690400 | 13.03980700 L |
| H-H_  | -5.00205100  | 9.81906100 | 9.50271400 L  |
| C-C_R | -3.93669400  | 7.95115200 | 9.49722500 L  |
| H-H_  | -3.15457800  | 5.95139000 | 9.62273500 L  |
| C-C_R | -7.35373400  | 3.40673900 | 14.06350900 L |
| H-H_  | -5.73681900  | 4.56917300 | 14.87132300 L |
| H-H_  | -8.98642900  | 2.47850000 | 13.01746200 L |
| H-H_  | -3.01689600  | 8.37540000 | 9.11276300 L  |
| H-H_  | -7.32172400  | 2.66121200 | 14.84828500 L |
| C-C_R | -27.54855500 | 3.93481000 | 1.57463700 L  |
| H-H_  | -26.79629100 | 3.17563700 | 1.39342900 L  |
| C-C_R | -29.46029900 | 5.19335700 | 0.85539900 L  |
| H-H_  | -30.20312700 | 5.43325700 | 0.10361700 L  |
| C-C_R | -28.49969600 | 4.22037600 | 0.60267100 L  |
| H-H_  | -28.49099900 | 3.69245500 | -0.34427200 L |
| C-C_R | -27.55838200 | 4.60312300 | 2.78933100 L  |
| C-C_R | -28.51738100 | 5.58741600 | 3.04019500 L  |
| H-H_  | -26.82273900 | 4.36912300 | 3.54980700 L  |
| N-N_R | -28.52587400 | 6.27624100 | 4.27106000 L  |
| C-C_R | -29.46878400 | 5.87986600 | 2.05988900 L  |
| C-C_R | -27.31772500 | 6.68586000 | 4.85839600 L  |
| C-C_R | -29.75119300 | 6.57370400 | 4.90043500 L  |
| H-H_  | -30.20836100 | 6.64881800 | 2.24805300 L  |
| C-C_R | -27.14757400 | 6.62136300 | 6.24602400 L  |
| C-C_R | -26.26167700 | 7.16006100 | 4.07307700 L  |
| C-C_R | -30.78100500 | 5.62910600 | 4.92857200 L  |
| C-C_R | -29.95485100 | 7.81977100 | 5.49911900 L  |
| H-H_  | -27.94348600 | 6.22087500 | 6.86134600 L  |
| C-C_R | -25.96906000 | 7.04848500 | 6.82931200 L  |
| H-H_  | -26.37744800 | 7.21043500 | 2.99730100 L  |
| C-C_R | -25.07932800 | 7.56360400 | 4.66196100 L  |
| C-C_R | -31.98857000 | 5.93232100 | 5.53731400 L  |
| H-H_  | -30.62356500 | 4.65951900 | 4.47216200 L  |
| H-H_  | -29.16305800 | 8.55887700 | 5.47249600 L  |
| C-C_R | -31.16194300 | 8.11003400 | 6.11658100 L  |
| C-C_R | -24.91669700 | 7.54295000 | 6.05112300 L  |
| H-H_  | -25.85632200 | 6.97003400 | 7.90322900 L  |

|       |              |             |               |
|-------|--------------|-------------|---------------|
| H-H_  | -24.25864200 | 7.91347200  | 4.04832200 L  |
| H-H_  | -32.77722900 | 5.18847700  | 5.55237300 L  |
| C-C_R | -32.18794400 | 7.17036900  | 6.13715900 L  |
| H-H_  | -31.30450100 | 9.08322600  | 6.57226200 L  |
| C-C_R | -23.62660000 | 7.95502900  | 6.63216200 L  |
| H-H_  | -33.13325800 | 7.40269800  | 6.61331900 L  |
| N-N_R | -22.56119900 | 7.67292600  | 5.89780900 L  |
| C-C_R | -23.46669400 | 8.58135600  | 7.91083900 L  |
| C-C_R | -21.34897000 | 7.87270500  | 6.41431600 L  |
| N-N_R | -22.26938500 | 8.69421700  | 8.45571100 L  |
| C-C_R | -24.56781300 | 9.17600800  | 8.69459600 L  |
| C-C_R | -21.19349400 | 8.31392800  | 7.75041600 L  |
| C-C_R | -20.17901300 | 7.60220000  | 5.64128800 L  |
| C-C_R | -25.64214200 | 9.84058000  | 8.09406100 L  |
| C-C_R | -24.50218800 | 9.15436200  | 10.09030000 L |
| C-C_R | -19.89645000 | 8.40984600  | 8.32709900 L  |
| C-C_R | -18.93294600 | 7.72503900  | 6.21301400 L  |
| C-C_R | -20.31276700 | 7.16824300  | 4.29071700 L  |
| C-C_R | -26.62824400 | 10.43519300 | 8.85798900 L  |
| H-H_  | -25.69383900 | 9.91857200  | 7.01569100 L  |
| H-H_  | -23.65569400 | 8.67301100  | 10.56431400 L |
| C-C_R | -25.49647000 | 9.72577000  | 10.86195000 L |
| C-C_R | -18.75583500 | 8.09189500  | 7.56546900 L  |
| C-C_R | -19.80171700 | 8.89985600  | 9.65753300 L  |
| H-H_  | -18.06174600 | 7.48529700  | 5.61793700 L  |
| N-N_R | -20.39552200 | 6.81281100  | 3.19116400 L  |
| H-H_  | -27.44236600 | 10.96358400 | 8.37754300 L  |
| C-C_R | -26.58014000 | 10.37062300 | 10.25442200 L |
| H-H_  | -25.44267000 | 9.67383300  | 11.94197700 L |
| N-N_R | -19.72261900 | 9.30189600  | 10.74279500 L |
| N-N_R | -27.59866800 | 10.94894800 | 11.02894600 L |
| C-C_R | -28.94062700 | 10.86189600 | 10.60525400 L |
| C-C_R | -27.28857500 | 11.59619600 | 12.24247400 L |
| C-C_R | -29.43340000 | 9.67757900  | 10.05349400 L |
| C-C_R | -29.79577600 | 11.95844400 | 10.73831200 L |
| C-C_R | -28.10508000 | 11.42566200 | 13.36306400 L |
| C-C_R | -26.15895400 | 12.41367400 | 12.33938400 L |
| H-H_  | -28.77462800 | 8.82213900  | 9.95547700 L  |
| C-C_R | -30.75448600 | 9.59530700  | 9.63920800 L  |
| H-H_  | -29.41633800 | 12.88052700 | 11.16132500 L |
| C-C_R | -31.11940900 | 11.86390700 | 10.33484700 L |
| H-H_  | -28.97663200 | 10.78610900 | 13.29485700 L |
| C-C_R | -27.79999800 | 12.07121100 | 14.55232300 L |
| H-H_  | -25.52674900 | 12.55192300 | 11.47097800 L |

|       |              |             |               |
|-------|--------------|-------------|---------------|
| C-C_R | -25.85315400 | 13.03921100 | 13.53764200 L |
| H-H_  | -31.11968800 | 8.66664800  | 9.21643500 L  |
| C-C_R | -31.60638300 | 10.68517600 | 9.77960200 L  |
| H-H_  | -31.77126000 | 12.72254500 | 10.44320100 L |
| C-C_R | -26.67099400 | 12.87761700 | 14.64910500 L |
| H-H_  | -28.44210400 | 11.92935400 | 15.41338400 L |
| H-H_  | -24.97224700 | 13.66796200 | 13.59663800 L |
| H-H_  | -32.64046500 | 10.61566300 | 9.46433800 L  |
| H-H_  | -26.43145500 | 13.37315900 | 15.58311500 L |
| C-C_R | 19.04701000  | 15.57115900 | 3.26249400 L  |
| H-H_  | 18.09854000  | 16.09247900 | 3.32401300 L  |
| C-C_R | 21.09099200  | 15.08175900 | 2.09354600 L  |
| H-H_  | 21.73374200  | 15.20482900 | 1.22954600 L  |
| C-C_R | 19.87226100  | 15.75041500 | 2.15782400 L  |
| H-H_  | 19.56619000  | 16.40446700 | 1.34930000 L  |
| C-C_R | 19.43097800  | 14.73746600 | 4.29837400 L  |
| C-C_R | 20.65500700  | 14.06013800 | 4.23216700 L  |
| H-H_  | 18.79538600  | 14.61025300 | 5.16592500 L  |
| N-N_R | 21.04376000  | 13.20458300 | 5.27683100 L  |
| C-C_R | 21.48429600  | 14.23757100 | 3.11723200 L  |
| C-C_R | 20.08788200  | 12.39804200 | 5.91380000 L  |
| C-C_R | 22.38771500  | 13.14589800 | 5.68052100 L  |
| H-H_  | 22.42137300  | 13.69862800 | 3.05699100 L  |
| C-C_R | 20.13624000  | 12.20985200 | 7.29955000 L  |
| C-C_R | 19.07052000  | 11.78359900 | 5.17153500 L  |
| C-C_R | 23.16193200  | 14.31169800 | 5.73400900 L  |
| C-C_R | 22.96051800  | 11.92001300 | 6.03558800 L  |
| H-H_  | 20.89255300  | 12.72200100 | 7.88317400 L  |
| C-C_R | 19.20329400  | 11.40454400 | 7.92242700 L  |
| H-H_  | 19.02965500  | 11.92477600 | 4.09857800 L  |
| C-C_R | 18.13722600  | 10.98920000 | 5.80558700 L  |
| C-C_R | 24.48722400  | 14.24223600 | 6.12866800 L  |
| H-H_  | 22.71198700  | 15.26308500 | 5.47765400 L  |
| H-H_  | 22.36630500  | 11.01693100 | 5.98180100 L  |
| C-C_R | 24.28631600  | 11.86519200 | 6.43476300 L  |
| C-C_R | 18.20086300  | 10.76392100 | 7.18542200 L  |
| H-H_  | 19.23431000  | 11.28791000 | 8.99796600 L  |
| H-H_  | 17.33721400  | 10.52685700 | 5.24142700 L  |
| H-H_  | 25.07517900  | 15.15199500 | 6.17413200 L  |
| C-C_R | 25.05580500  | 13.02248400 | 6.48137500 L  |
| H-H_  | 24.72143500  | 10.90928100 | 6.70079900 L  |
| C-C_R | 17.15567600  | 9.93644100  | 7.82985200 L  |
| H-H_  | 26.09388500  | 12.97616300 | 6.78974700 L  |
| N-N_R | 15.94703700  | 10.09443500 | 7.30783400 L  |



|       |             |             |               |
|-------|-------------|-------------|---------------|
| C-C_R | 17.36822600 | 9.08902600  | 8.94180700 L  |
| C-C_R | 14.90303200 | 9.51840400  | 7.91373600 L  |
| N-N_R | 16.32280800 | 8.58687100  | 9.60154500 L  |
| C-C_R | 18.68925200 | 8.66000700  | 9.43730000 L  |
| C-C_R | 15.10100800 | 8.81126300  | 9.13367500 L  |
| C-C_R | 13.59605300 | 9.65354600  | 7.36586600 L  |
| C-C_R | 19.76806800 | 8.41415800  | 8.57991900 L  |
| C-C_R | 18.86171800 | 8.41165600  | 10.80402600 L |
| C-C_R | 13.95343900 | 8.31471800  | 9.83182900 L  |
| C-C_R | 12.48196300 | 9.11360400  | 8.04728900 L  |
| C-C_R | 13.46462300 | 10.40573900 | 6.17023800 L  |
| C-C_R | 20.98418900 | 7.98012500  | 9.06952800 L  |
| H-H_  | 19.64293500 | 8.53299000  | 7.51022600 L  |
| H-H_  | 18.02087000 | 8.56075500  | 11.46902200 L |
| C-C_R | 20.07851900 | 7.98767400  | 11.30371000 L |
| C-C_R | 12.69534300 | 8.48330500  | 9.28808900 L  |
| C-C_R | 14.12705100 | 7.61816500  | 11.05803500 L |
| N-N_R | 13.36654500 | 11.02118300 | 5.19056800 L  |
| H-H_  | 21.80309900 | 7.77016200  | 8.39239000 L  |
| C-C_R | 21.16019400 | 7.77449200  | 10.44262900 L |
| H-H_  | 20.20125500 | 7.82208000  | 12.36761200 L |
| H-H_  | 11.84654500 | 8.07176600  | 9.81716200 L  |
| N-N_R | 14.25567200 | 7.04693200  | 12.05813600 L |
| N-N_R | 22.40126000 | 7.34328600  | 10.94242300 L |
| C-C_R | 23.59065700 | 7.88885900  | 10.42697300 L |
| C-C_R | 22.45084000 | 6.36921700  | 11.95996900 L |
| C-C_R | 23.66857300 | 9.25451600  | 10.13342000 L |
| C-C_R | 24.70875700 | 7.07995300  | 10.20618100 L |
| C-C_R | 23.38565000 | 6.47300200  | 12.99413000 L |
| C-C_R | 21.55957100 | 5.29273500  | 11.94755400 L |
| H-H_  | 22.80863500 | 9.88708900  | 10.31638400 L |
| C-C_R | 24.84225400 | 9.79244500  | 9.62834300 L  |
| H-H_  | 24.64803100 | 6.02046900  | 10.42349500 L |
| C-C_R | 25.87906600 | 7.62909600  | 9.70830800 L  |
| H-H_  | 24.06793200 | 7.31521300  | 13.01396800 L |
| C-C_R | 23.42875400 | 5.51091300  | 13.99083100 L |
| H-H_  | 20.83894000 | 5.20578500  | 11.14397900 L |
| C-C_R | 21.60327100 | 4.34337400  | 12.95762100 L |
| H-H_  | 24.88987200 | 10.85553100 | 9.42052800 L  |
| C-C_R | 25.95523000 | 8.98762200  | 9.41503900 L  |
| H-H_  | 26.73734500 | 6.98786100  | 9.54054900 L  |
| C-C_R | 22.53818900 | 4.44320900  | 13.98132300 L |
| H-H_  | 24.15510400 | 5.60564300  | 14.78913700 L |
| H-H_  | 20.90549400 | 3.51497000  | 12.93527700 L |

|       |             |             |               |
|-------|-------------|-------------|---------------|
| H-H_  | 26.87502800 | 9.41187100  | 9.03057800 L  |
| H-H_  | 22.57019900 | 3.69768200  | 14.76609900 L |
| C-C_R | 2.34336800  | 4.97128000  | 1.49245200 L  |
| H-H_  | 3.09563200  | 4.21210800  | 1.31124300 L  |
| C-C_R | 0.43162400  | 6.22982700  | 0.77321300 L  |
| H-H_  | -0.31120400 | 6.46972700  | 0.02143100 L  |
| C-C_R | 1.39222700  | 5.25684600  | 0.52048500 L  |
| H-H_  | 1.40092400  | 4.72892500  | -0.42645800 L |
| C-C_R | 2.33354100  | 5.63959400  | 2.70714600 L  |
| C-C_R | 1.37454200  | 6.62388600  | 2.95800900 L  |
| H-H_  | 3.06918400  | 5.40559300  | 3.46762100 L  |
| N-N_R | 1.36604900  | 7.31271100  | 4.18887500 L  |
| C-C_R | 0.42313900  | 6.91633700  | 1.97770400 L  |
| C-C_R | 2.57419900  | 7.72233000  | 4.77621000 L  |
| C-C_R | 0.14073000  | 7.61017400  | 4.81824900 L  |
| H-H_  | -0.31643700 | 7.68528800  | 2.16586800 L  |
| C-C_R | 2.74434900  | 7.65783400  | 6.16383900 L  |
| C-C_R | 3.63024600  | 8.19653200  | 3.99089100 L  |
| C-C_R | -0.88908200 | 6.66557700  | 4.84638600 L  |
| C-C_R | -0.06292800 | 8.85624100  | 5.41693300 L  |
| H-H_  | 1.94843700  | 7.25734500  | 6.77916100 L  |
| C-C_R | 3.92286300  | 8.08495600  | 6.74712600 L  |
| H-H_  | 3.51447500  | 8.24690600  | 2.91511600 L  |
| C-C_R | 4.81259500  | 8.60007500  | 4.57977600 L  |
| C-C_R | -2.09664700 | 6.96879100  | 5.45512900 L  |
| H-H_  | -0.73164200 | 5.69599000  | 4.38997700 L  |
| H-H_  | 0.72886500  | 9.59534700  | 5.39031100 L  |
| C-C_R | -1.27001900 | 9.14650500  | 6.03439600 L  |
| C-C_R | 4.97522600  | 8.57942000  | 5.96893700 L  |
| H-H_  | 4.03560100  | 8.00650400  | 7.82104300 L  |
| H-H_  | 5.63328100  | 8.94994300  | 3.96613700 L  |
| H-H_  | -2.88530500 | 6.22494800  | 5.47018700 L  |
| C-C_R | -2.29602100 | 8.20683900  | 6.05497300 L  |
| H-H_  | -1.41157800 | 10.11973100 | 6.49007400 L  |
| C-C_R | 6.26632200  | 8.99153400  | 6.54997400 L  |
| H-H_  | -3.24133500 | 8.43916800  | 6.53113400 L  |
| N-N_R | 7.33072500  | 8.70939600  | 5.81562400 L  |
| C-C_R | 6.42522900  | 9.61782700  | 7.82865300 L  |
| C-C_R | 8.54395300  | 8.90921000  | 6.33212700 L  |
| N-N_R | 7.62253900  | 9.73068800  | 8.37352500 L  |
| C-C_R | 5.32411000  | 10.21247900 | 8.61241100 L  |
| C-C_R | 8.69842900  | 9.35039800  | 7.66823100 L  |
| C-C_R | 9.71291000  | 8.63867000  | 5.55910200 L  |
| C-C_R | 4.24978200  | 10.87705100 | 8.01187600 L  |

|       |              |             |               |
|-------|--------------|-------------|---------------|
| C-C_R | 5.38973500   | 10.19083300 | 10.00811400 L |
| C-C_R | 9.99547400   | 9.44631600  | 8.24491300 L  |
| C-C_R | 10.95897800  | 8.76151000  | 6.13082800 L  |
| C-C_R | 9.57915600   | 8.20471300  | 4.20853200 L  |
| C-C_R | 3.26368000   | 11.47166300 | 8.77580400 L  |
| H-H_  | 4.19808500   | 10.95504200 | 6.93350500 L  |
| H-H_  | 6.23623000   | 9.70948100  | 10.48212800 L |
| C-C_R | 4.39545400   | 10.76224000 | 10.77976400 L |
| C-C_R | 11.13608800  | 9.12836500  | 7.48328400 L  |
| C-C_R | 10.09120600  | 9.93636100  | 9.57534500 L  |
| H-H_  | 11.83017700  | 8.52176700  | 5.53575200 L  |
| N-N_R | 9.49640200   | 7.84928100  | 3.10897900 L  |
| H-H_  | 2.45055700   | 12.00008900 | 8.29535400 L  |
| C-C_R | 3.31178300   | 11.40709300 | 10.17223700 L |
| H-H_  | 4.44925400   | 10.71030300 | 11.85979100 L |
| N-N_R | 10.17030400  | 10.33840100 | 10.66060600 L |
| N-N_R | 2.29325500   | 11.98541800 | 10.94676100 L |
| C-C_R | 0.95129700   | 11.89836700 | 10.52306800 L |
| C-C_R | 2.60334800   | 12.63266600 | 12.16028900 L |
| C-C_R | 0.45852300   | 10.71404900 | 9.97130800 L  |
| C-C_R | 0.09614700   | 12.99491500 | 10.65612700 L |
| C-C_R | 1.78684300   | 12.46213200 | 13.28087800 L |
| C-C_R | 3.73296900   | 13.45014400 | 12.25719800 L |
| H-H_  | 1.11729500   | 9.85860900  | 9.87329100 L  |
| C-C_R | -0.86156400  | 10.63181200 | 9.55702000 L  |
| H-H_  | 0.47558600   | 13.91699700 | 11.07914000 L |
| C-C_R | -1.22748600  | 12.90037700 | 10.25266100 L |
| H-H_  | 0.91529100   | 11.82258000 | 13.21267200 L |
| C-C_R | 2.09192500   | 13.10768200 | 14.47013700 L |
| H-H_  | 4.36517400   | 13.58839300 | 11.38879200 L |
| C-C_R | 4.03877000   | 14.07568100 | 13.45545600 L |
| H-H_  | -1.22776500  | 9.70311800  | 9.13425000 L  |
| C-C_R | -1.71445900  | 11.72164700 | 9.69741700 L  |
| H-H_  | -1.87933600  | 13.75901500 | 10.36101600 L |
| C-C_R | 3.22092900   | 13.91408700 | 14.56691900 L |
| H-H_  | 1.44981900   | 12.96582400 | 15.33119900 L |
| H-H_  | 4.91967600   | 14.70443200 | 13.51445300 L |
| H-H_  | -2.74854200  | 11.65213300 | 9.38215300 L  |
| H-H_  | 3.46046800   | 14.40962900 | 15.50092900 L |
| C-C_R | -10.89571600 | 15.34507300 | -4.54866700 L |
| H-H_  | -11.84318600 | 15.86642700 | -4.48715100 L |
| C-C_R | -8.85073400  | 14.85570700 | -5.71761800 L |
| H-H_  | -8.20798400  | 14.97877700 | -6.58161800 L |
| C-C_R | -10.06946400 | 15.52436300 | -5.65334000 L |

|       |              |             |               |
|-------|--------------|-------------|---------------|
| H-H_  | -10.37553600 | 16.17841600 | -6.46186300 L |
| C-C_R | -10.51174700 | 14.51138000 | -3.51278700 L |
| C-C_R | -9.28771800  | 13.83405100 | -3.57899400 L |
| H-H_  | -11.14633400 | 14.38409900 | -2.64424500 L |
| N-N_R | -8.89796600  | 12.97853100 | -2.53433300 L |
| C-C_R | -8.45742300  | 14.01141700 | -4.69293700 L |
| C-C_R | -9.85384400  | 12.17199000 | -1.89736400 L |
| C-C_R | -7.55400400  | 12.91974400 | -2.12964800 L |
| H-H_  | -7.52035300  | 13.47257700 | -4.75417300 L |
| C-C_R | -9.80647900  | 11.98366400 | -0.51061600 L |
| C-C_R | -10.87120600 | 11.55754700 | -2.63962900 L |
| C-C_R | -6.77979400  | 14.08564600 | -2.07715500 L |
| C-C_R | -6.98120800  | 11.69396100 | -1.77557600 L |
| H-H_  | -9.04917200  | 12.49594900 | 0.07201000 L  |
| C-C_R | -10.73843200 | 11.17849300 | 0.11126300 L  |
| H-H_  | -10.91307100 | 11.69868900 | -3.71258300 L |
| C-C_R | -11.80450000 | 10.76314800 | -2.00557700 L |
| C-C_R | -5.45450200  | 14.01618400 | -1.68249600 L |
| H-H_  | -7.22973900  | 15.03703400 | -2.33351000 L |
| H-H_  | -7.57542000  | 10.79087900 | -1.82936300 L |
| C-C_R | -5.65541000  | 11.63914000 | -1.37640100 L |
| C-C_R | -11.74086300 | 10.53786900 | -0.62574200 L |
| H-H_  | -10.70741600 | 11.06185800 | 1.18680200 L  |
| H-H_  | -12.60451200 | 10.30080500 | -2.56973700 L |
| H-H_  | -4.86654100  | 14.92584100 | -1.63603700 L |
| C-C_R | -4.88592100  | 12.79643200 | -1.32978900 L |
| H-H_  | -5.22029100  | 10.68322900 | -1.11036500 L |
| C-C_R | -12.78604900 | 9.71039000  | 0.01868800 L  |
| H-H_  | -3.84884000  | 12.75007700 | -1.02141400 L |
| N-N_R | -13.99468900 | 9.86838300  | -0.50333000 L |
| C-C_R | -12.57350000 | 8.86297400  | 1.13064300 L  |
| C-C_R | -15.03868800 | 9.29225000  | 0.10356700 L  |
| N-N_R | -13.61891800 | 8.36081900  | 1.79038100 L  |
| C-C_R | -11.25246700 | 8.43385300  | 1.62713000 L  |
| C-C_R | -14.84071800 | 8.58521100  | 1.32251100 L  |
| C-C_R | -16.34567300 | 9.42749500  | -0.44529800 L |
| C-C_R | -10.17365200 | 8.18800400  | 0.76975000 L  |
| C-C_R | -11.08000800 | 8.18560400  | 2.99286200 L  |
| C-C_R | -15.98828600 | 8.08866600  | 2.02066500 L  |
| C-C_R | -17.45976300 | 8.88755200  | 0.23612500 L  |
| C-C_R | -16.47710300 | 10.17968700 | -1.64092600 L |
| C-C_R | -8.95753100  | 7.75397100  | 1.25935800 L  |
| H-H_  | -10.29879100 | 8.30693800  | -0.30093800 L |
| H-H_  | -11.92085500 | 8.33470400  | 3.65785800 L  |

|       |              |             |               |
|-------|--------------|-------------|---------------|
| C-C_R | -9.86320700  | 7.76162200  | 3.49254600 L  |
| C-C_R | -17.24637700 | 8.25715100  | 1.47792000 L  |
| C-C_R | -15.81467400 | 7.39211300  | 3.24687100 L  |
| N-N_R | -16.57517500 | 10.79502900 | -2.61960100 L |
| H-H_  | -8.13862700  | 7.54411100  | 0.58122600 L  |
| C-C_R | -8.78153200  | 7.54844000  | 2.63146500 L  |
| H-H_  | -9.74047100  | 7.59602800  | 4.55644800 L  |
| H-H_  | -18.09618000 | 7.84567900  | 2.00600100 L  |
| N-N_R | -15.68605400 | 6.82088100  | 4.24697200 L  |
| N-N_R | -7.54146500  | 7.11720000  | 3.13126200 L  |
| C-C_R | -6.35206900  | 7.66277200  | 2.61581100 L  |
| C-C_R | -7.49087900  | 6.14306300  | 4.14980000 L  |
| C-C_R | -6.27314700  | 9.02836200  | 2.32325100 L  |
| C-C_R | -5.23296900  | 6.85390100  | 2.39501700 L  |
| C-C_R | -6.55607600  | 6.24695000  | 5.18296600 L  |
| C-C_R | -8.38214900  | 5.06658100  | 4.13738500 L  |
| H-H_  | -7.13309000  | 9.66103700  | 2.50522000 L  |
| C-C_R | -5.09946600  | 9.56629100  | 1.81817300 L  |
| H-H_  | -5.29369400  | 5.79441700  | 2.61233100 L  |
| C-C_R | -4.06265900  | 7.40304400  | 1.89714400 L  |
| H-H_  | -5.87379400  | 7.08916100  | 5.20280400 L  |
| C-C_R | -6.51297200  | 5.28486200  | 6.17966700 L  |
| H-H_  | -9.10278600  | 4.97973300  | 3.33281500 L  |
| C-C_R | -8.33845500  | 4.11732200  | 5.14645700 L  |
| H-H_  | -5.05185400  | 10.62947900 | 1.60936400 L  |
| C-C_R | -3.98649600  | 8.76157000  | 1.60387500 L  |
| H-H_  | -3.20438100  | 6.76180900  | 1.72938500 L  |
| C-C_R | -7.40353700  | 4.21715700  | 6.17015900 L  |
| H-H_  | -5.78662200  | 5.37959100  | 6.97797300 L  |
| H-H_  | -9.03623200  | 3.28891800  | 5.12411300 L  |
| H-H_  | -3.06669800  | 9.18581900  | 1.21941400 L  |
| H-H_  | -7.37152600  | 3.47163000  | 6.95493500 L  |
| C-C_R | -27.59835800 | 4.74522800  | -6.31871200 L |
| H-H_  | -26.84609300 | 3.98605600  | -6.49992100 L |
| C-C_R | -29.51010200 | 6.00377500  | -7.03795100 L |
| H-H_  | -30.25293000 | 6.24367500  | -7.78973300 L |
| C-C_R | -28.54949900 | 5.03079400  | -7.29067900 L |
| H-H_  | -28.54079500 | 4.50277100  | -8.23662700 L |
| C-C_R | -27.60818500 | 5.41354200  | -5.10401800 L |
| C-C_R | -28.56718400 | 6.39783400  | -4.85315500 L |
| H-H_  | -26.87254200 | 5.17954200  | -4.34354300 L |
| N-N_R | -28.57567000 | 7.08655700  | -3.62129500 L |
| C-C_R | -29.51858700 | 6.69028500  | -5.83346000 L |
| C-C_R | -27.36752700 | 7.49627800  | -3.03495400 L |

|       |              |             |               |
|-------|--------------|-------------|---------------|
| C-C_R | -29.80099000 | 7.38402100  | -2.99192000 L |
| H-H_  | -30.25816300 | 7.45923700  | -5.64529600 L |
| C-C_R | -27.19737700 | 7.43178200  | -1.64732500 L |
| C-C_R | -26.31147900 | 7.97048000  | -3.82027300 L |
| C-C_R | -30.83080800 | 6.43952500  | -2.96477700 L |
| C-C_R | -30.00465400 | 8.63019000  | -2.39423100 L |
| H-H_  | -27.99328200 | 7.03119100  | -1.03100800 L |
| C-C_R | -26.01886300 | 7.85890400  | -1.06403800 L |
| H-H_  | -26.42725100 | 8.02085400  | -4.89604800 L |
| C-C_R | -25.12913100 | 8.37402300  | -3.23138800 L |
| C-C_R | -32.03837200 | 6.74274000  | -2.35603500 L |
| H-H_  | -30.67336800 | 5.46993800  | -3.42118700 L |
| H-H_  | -29.21286100 | 9.36929600  | -2.42085300 L |
| C-C_R | -31.21174500 | 8.92045300  | -1.77676800 L |
| C-C_R | -24.96650000 | 8.35336800  | -1.84222700 L |
| H-H_  | -25.90612500 | 7.78045200  | 0.00987900 L  |
| H-H_  | -24.30844500 | 8.72389100  | -3.84502700 L |
| H-H_  | -32.82702500 | 5.99879400  | -2.33998200 L |
| C-C_R | -32.23774700 | 7.98078700  | -1.75619100 L |
| H-H_  | -31.35429700 | 9.89354200  | -1.32009300 L |
| C-C_R | -23.67640300 | 8.76544800  | -1.26118700 L |
| H-H_  | -33.18306000 | 8.21311600  | -1.28003000 L |
| N-N_R | -22.61100100 | 8.48334400  | -1.99554000 L |
| C-C_R | -23.51649100 | 9.39167300  | 0.01848400 L  |
| C-C_R | -21.39877200 | 8.68312400  | -1.47903400 L |
| N-N_R | -22.31918700 | 9.50463600  | 0.56236100 L  |
| C-C_R | -24.61761500 | 9.98642700  | 0.80124700 L  |
| C-C_R | -21.24329000 | 9.12424400  | -0.14193900 L |
| C-C_R | -20.22881600 | 8.41261900  | -2.25206200 L |
| C-C_R | -25.69194400 | 10.65099900 | 0.20071200 L  |
| C-C_R | -24.55199100 | 9.96478100  | 2.19695000 L  |
| C-C_R | -19.94625200 | 9.22026400  | 0.43374900 L  |
| C-C_R | -18.98274200 | 8.53535600  | -1.67934100 L |
| C-C_R | -20.36257000 | 7.97866100  | -3.60263200 L |
| C-C_R | -26.67804600 | 11.24561100 | 0.96464000 L  |
| H-H_  | -25.74364100 | 10.72899100 | -0.87765900 L |
| H-H_  | -23.70549600 | 9.48342900  | 2.67096400 L  |
| C-C_R | -25.54627200 | 10.53618800 | 2.96860000 L  |
| C-C_R | -18.80563800 | 8.90231400  | -0.32788000 L |
| C-C_R | -19.85151900 | 9.71027400  | 1.76418400 L  |
| H-H_  | -18.11154900 | 8.29571500  | -2.27541200 L |
| N-N_R | -20.44532400 | 7.62323000  | -4.70218500 L |
| H-H_  | -27.49216900 | 11.77400200 | 0.48419300 L  |
| C-C_R | -26.62993600 | 11.18093900 | 2.36206800 L  |

|       |              |             |               |
|-------|--------------|-------------|---------------|
| H-H_  | -25.49247200 | 10.48425100 | 4.04862700 L  |
| N-N_R | -19.77242100 | 10.11231500 | 2.84944500 L  |
| N-N_R | -27.64847100 | 11.75936600 | 3.13559700 L  |
| C-C_R | -28.99042900 | 11.67231500 | 2.71190400 L  |
| C-C_R | -27.33837100 | 12.40651200 | 4.35012000 L  |
| C-C_R | -29.48320300 | 10.48799700 | 2.16014400 L  |
| C-C_R | -29.84557300 | 12.76876100 | 2.84595800 L  |
| C-C_R | -28.15488300 | 12.23608000 | 5.46971400 L  |
| C-C_R | -26.20875700 | 13.22409200 | 4.44603500 L  |
| H-H_  | -28.82443100 | 9.63255700  | 2.06212700 L  |
| C-C_R | -30.80428300 | 10.40562300 | 1.74685300 L  |
| H-H_  | -29.46614000 | 13.69094500 | 3.26797600 L  |
| C-C_R | -31.16921200 | 12.67432500 | 2.44149700 L  |
| H-H_  | -29.02643400 | 11.59652800 | 5.40150800 L  |
| C-C_R | -27.84979400 | 12.88152800 | 6.65996800 L  |
| H-H_  | -25.57655200 | 13.36234200 | 3.57762800 L  |
| C-C_R | -25.90295600 | 13.84962900 | 5.64429200 L  |
| H-H_  | -31.16949000 | 9.47706600  | 1.32308600 L  |
| C-C_R | -31.65618500 | 11.49559500 | 1.88625300 L  |
| H-H_  | -31.82106200 | 13.53296300 | 2.54985200 L  |
| C-C_R | -26.72079000 | 13.68793300 | 6.75675000 L  |
| H-H_  | -28.49190100 | 12.73967000 | 7.52103000 L  |
| H-H_  | -25.02205000 | 14.47838100 | 5.70328900 L  |
| H-H_  | -32.69026800 | 11.42608100 | 1.57098900 L  |
| H-H_  | -26.48125700 | 14.18357800 | 7.68976500 L  |
| C-C_R | 18.99720700  | 16.38157800 | -4.63085600 L |
| H-H_  | 18.04873800  | 16.90289700 | -4.56933600 L |
| C-C_R | 21.04119000  | 15.89217700 | -5.79980400 L |
| H-H_  | 21.68393900  | 16.01524800 | -6.66380300 L |
| C-C_R | 19.82245900  | 16.56083400 | -5.73552600 L |
| H-H_  | 19.51638700  | 17.21488600 | -6.54404900 L |
| C-C_R | 19.38117500  | 15.54788500 | -3.59497500 L |
| C-C_R | 20.60520500  | 14.87055700 | -3.66118200 L |
| H-H_  | 18.74559000  | 15.42057000 | -2.72643000 L |
| N-N_R | 20.99395800  | 14.01500100 | -2.61651800 L |
| C-C_R | 21.43450000  | 15.04788800 | -4.77512300 L |
| C-C_R | 20.03807900  | 13.20846100 | -1.97954900 L |
| C-C_R | 22.33791900  | 13.95621500 | -2.21183300 L |
| H-H_  | 22.37157100  | 14.50904700 | -4.83635900 L |
| C-C_R | 20.08644400  | 13.02016900 | -0.59280400 L |
| C-C_R | 19.02071700  | 12.59401700 | -2.72181500 L |
| C-C_R | 23.11212900  | 15.12211600 | -2.15934100 L |
| C-C_R | 22.91071500  | 12.73043200 | -1.85776200 L |
| H-H_  | 20.84275100  | 13.53241900 | -0.01017600 L |

|       |             |             |               |
|-------|-------------|-------------|---------------|
| C-C_R | 19.15349200 | 12.21496300 | 0.02907800 L  |
| H-H_  | 18.97985200 | 12.73519400 | -3.79477100 L |
| C-C_R | 18.08742400 | 11.79961800 | -2.08776200 L |
| C-C_R | 24.43742200 | 15.05265500 | -1.76468200 L |
| H-H_  | 22.66218500 | 16.07350400 | -2.41569500 L |
| H-H_  | 22.31650300 | 11.82734900 | -1.91154800 L |
| C-C_R | 24.23651300 | 12.67561100 | -1.45858700 L |
| C-C_R | 18.15106000 | 11.57433900 | -0.70792700 L |
| H-H_  | 19.18450700 | 12.09832800 | 1.10461700 L  |
| H-H_  | 17.28741100 | 11.33727500 | -2.65192300 L |
| H-H_  | 25.02538200 | 15.96231100 | -1.71822300 L |
| C-C_R | 25.00600300 | 13.83290200 | -1.41197500 L |
| H-H_  | 24.67163200 | 11.71970000 | -1.19255000 L |
| C-C_R | 17.10587400 | 10.74686000 | -0.06349700 L |
| H-H_  | 26.04408200 | 13.78658200 | -1.10360200 L |
| N-N_R | 15.89723400 | 10.90485400 | -0.58551500 L |
| C-C_R | 17.31842300 | 9.89944500  | 1.04845700 L  |
| C-C_R | 14.85323500 | 10.32872000 | 0.02138100 L  |
| N-N_R | 16.27300500 | 9.39728900  | 1.70819500 L  |
| C-C_R | 18.63945600 | 9.47032400  | 1.54494500 L  |
| C-C_R | 15.05120500 | 9.62168200  | 1.24032500 L  |
| C-C_R | 13.54625100 | 10.46396500 | -0.52748400 L |
| C-C_R | 19.71827200 | 9.22447500  | 0.68756400 L  |
| C-C_R | 18.81191600 | 9.22207400  | 2.91067700 L  |
| C-C_R | 13.90363700 | 9.12513700  | 1.93847900 L  |
| C-C_R | 12.43216000 | 9.92402300  | 0.15394000 L  |
| C-C_R | 13.41482000 | 11.21615700 | -1.72311200 L |
| C-C_R | 20.93439200 | 8.79044200  | 1.17717300 L  |
| H-H_  | 19.59313300 | 9.34340800  | -0.38312300 L |
| H-H_  | 17.97106800 | 9.37117400  | 3.57567300 L  |
| C-C_R | 20.02871600 | 8.79809300  | 3.41036100 L  |
| C-C_R | 12.64554700 | 9.29362100  | 1.39573400 L  |
| C-C_R | 14.07724900 | 8.42858400  | 3.16468600 L  |
| N-N_R | 13.31674800 | 11.83150000 | -2.70178700 L |
| H-H_  | 21.75329600 | 8.58058100  | 0.49904000 L  |
| C-C_R | 21.11039100 | 8.58491000  | 2.54927900 L  |
| H-H_  | 20.15145200 | 8.63249900  | 4.47426200 L  |
| H-H_  | 11.79674200 | 8.88218400  | 1.92381300 L  |
| N-N_R | 14.20586900 | 7.85735100  | 4.16478700 L  |
| N-N_R | 22.35145700 | 8.15370500  | 3.04907300 L  |
| C-C_R | 23.54085400 | 8.69927700  | 2.53362300 L  |
| C-C_R | 22.40104400 | 7.17953400  | 4.06761400 L  |
| C-C_R | 23.61877700 | 10.06483200 | 2.24106500 L  |
| C-C_R | 24.65895400 | 7.89037200  | 2.31283100 L  |



|       |             |             |               |
|-------|-------------|-------------|---------------|
| C-C_R | 23.33584800 | 7.28342000  | 5.10078000 L  |
| C-C_R | 21.50977400 | 6.10305200  | 4.05519900 L  |
| H-H_  | 22.75883300 | 10.69750700 | 2.42303400 L  |
| C-C_R | 24.79245700 | 10.60276200 | 1.73598800 L  |
| H-H_  | 24.59822900 | 6.83088700  | 2.53014600 L  |
| C-C_R | 25.82926400 | 8.43951500  | 1.81495800 L  |
| H-H_  | 24.01812900 | 8.12563100  | 5.12061900 L  |
| C-C_R | 23.37895200 | 6.32133200  | 6.09748100 L  |
| H-H_  | 20.78913800 | 6.01620400  | 3.25062900 L  |
| C-C_R | 21.55346800 | 5.15379300  | 5.06427200 L  |
| H-H_  | 24.84007000 | 11.66595000 | 1.52717900 L  |
| C-C_R | 25.90542700 | 9.79804100  | 1.52169000 L  |
| H-H_  | 26.68754200 | 7.79827900  | 1.64720000 L  |
| C-C_R | 22.48838600 | 5.25362800  | 6.08797400 L  |
| H-H_  | 24.10530200 | 6.41606200  | 6.89578800 L  |
| H-H_  | 20.85569200 | 4.32538900  | 5.04192700 L  |
| H-H_  | 26.82522500 | 10.22228900 | 1.13722800 L  |
| H-H_  | 22.52039700 | 4.50810100  | 6.87275000 L  |
| C-C_R | 2.29356600  | 5.78169900  | -6.40089800 L |
| H-H_  | 3.04583000  | 5.02252600  | -6.58210600 L |
| C-C_R | 0.38182100  | 7.04024600  | -7.12013600 L |
| H-H_  | -0.36100600 | 7.28014600  | -7.87191900 L |
| C-C_R | 1.34242400  | 6.06726500  | -7.37286400 L |
| H-H_  | 1.35112800  | 5.53924200  | -8.31881200 L |
| C-C_R | 2.28373800  | 6.45001200  | -5.18620400 L |
| C-C_R | 1.32473900  | 7.43430500  | -4.93534000 L |
| H-H_  | 3.01938100  | 6.21601200  | -4.42572800 L |
| N-N_R | 1.31625300  | 8.12302700  | -3.70348000 L |
| C-C_R | 0.37333600  | 7.72675500  | -5.91564600 L |
| C-C_R | 2.52439600  | 8.53274900  | -3.11714000 L |
| C-C_R | 0.09093400  | 8.42049100  | -3.07410600 L |
| H-H_  | -0.36624000 | 8.49570700  | -5.72748200 L |
| C-C_R | 2.69454700  | 8.46825200  | -1.72951100 L |
| C-C_R | 3.58044400  | 9.00695000  | -3.90245900 L |
| C-C_R | -0.93888500 | 7.47599500  | -3.04696300 L |
| C-C_R | -0.11273100 | 9.66666000  | -2.47641600 L |
| H-H_  | 1.89864100  | 8.06766200  | -1.11319400 L |
| C-C_R | 3.87306100  | 8.89537400  | -1.14622300 L |
| H-H_  | 3.46467200  | 9.05732400  | -4.97823400 L |
| C-C_R | 4.76279300  | 9.41049300  | -3.31357400 L |
| C-C_R | -2.14644900 | 7.77921000  | -2.43822100 L |
| H-H_  | -0.78144500 | 6.50640800  | -3.50337300 L |
| H-H_  | 0.67906200  | 10.40576600 | -2.50303900 L |
| C-C_R | -1.31982200 | 9.95692300  | -1.85895400 L |

|       |             |             |               |
|-------|-------------|-------------|---------------|
| C-C_R | 4.92542400  | 9.38983900  | -1.92441200 L |
| H-H_  | 3.98579800  | 8.81692300  | -0.07230600 L |
| H-H_  | 5.58347800  | 9.76036100  | -3.92721300 L |
| H-H_  | -2.93510200 | 7.03526400  | -2.42216700 L |
| C-C_R | -2.34582300 | 9.01725800  | -1.83837600 L |
| H-H_  | -1.46137400 | 10.93004700 | -1.40228100 L |
| C-C_R | 6.21652000  | 9.80195300  | -1.34337600 L |
| H-H_  | -3.29113700 | 9.24958700  | -1.36221600 L |
| N-N_R | 7.28092200  | 9.51981500  | -2.07772600 L |
| C-C_R | 6.37543200  | 10.42814300 | -0.06370200 L |
| C-C_R | 8.49415000  | 9.71962900  | -1.56122200 L |
| N-N_R | 7.57273600  | 10.54110600 | 0.48017600 L  |
| C-C_R | 5.27430800  | 11.02289700 | 0.71906100 L  |
| C-C_R | 8.64863300  | 10.16071400 | -0.22412400 L |
| C-C_R | 9.66310800  | 9.44908900  | -2.33424700 L |
| C-C_R | 4.19997900  | 11.68746900 | 0.11852600 L  |
| C-C_R | 5.33993300  | 11.00125100 | 2.11476500 L  |
| C-C_R | 9.94567100  | 10.25673500 | 0.35156400 L  |
| C-C_R | 10.90918100 | 9.57182600  | -1.76152600 L |
| C-C_R | 9.52935400  | 9.01513200  | -3.68481800 L |
| C-C_R | 3.21387700  | 12.28208200 | 0.88245400 L  |
| H-H_  | 4.14828200  | 11.76546100 | -0.95984400 L |
| H-H_  | 6.18642700  | 10.51990000 | 2.58877900 L  |
| C-C_R | 4.34565100  | 11.57265900 | 2.88641500 L  |
| C-C_R | 11.08628600 | 9.93878400  | -0.41006600 L |
| C-C_R | 10.04140300 | 10.74677900 | 1.68199600 L  |
| H-H_  | 11.78037400 | 9.33218600  | -2.35759800 L |
| N-N_R | 9.44659900  | 8.65970000  | -4.78437100 L |
| H-H_  | 2.40075400  | 12.81050700 | 0.40200500 L  |
| C-C_R | 3.26198700  | 12.21741000 | 2.27988200 L  |
| H-H_  | 4.39945100  | 11.52072200 | 3.96644200 L  |
| N-N_R | 10.12050100 | 11.14882000 | 2.76725700 L  |
| N-N_R | 2.24345300  | 12.79583700 | 3.05341100 L  |
| C-C_R | 0.90149400  | 12.70878500 | 2.62971900 L  |
| C-C_R | 2.55355200  | 13.44298300 | 4.26793400 L  |
| C-C_R | 0.40872000  | 11.52446800 | 2.07795900 L  |
| C-C_R | 0.04635000  | 13.80523100 | 2.76377200 L  |
| C-C_R | 1.73704100  | 13.27255100 | 5.38752900 L  |
| C-C_R | 3.68316600  | 14.26056300 | 4.36384900 L  |
| H-H_  | 1.06749300  | 10.66902800 | 1.97994200 L  |
| C-C_R | -0.91136000 | 11.44212800 | 1.66466500 L  |
| H-H_  | 0.42578300  | 14.72741600 | 3.18579000 L  |
| C-C_R | -1.27728800 | 13.71079600 | 2.35931200 L  |
| H-H_  | 0.86548900  | 12.63299800 | 5.31932200 L  |

|       |              |             |                |
|-------|--------------|-------------|----------------|
| C-C_R | 2.04212900   | 13.91799800 | 6.57778300 L   |
| H-H_  | 4.31537200   | 14.39881200 | 3.49544300 L   |
| C-C_R | 3.98896700   | 14.88610000 | 5.56210700 L   |
| H-H_  | -1.27756700  | 10.51353700 | 1.24090000 L   |
| C-C_R | -1.76426200  | 12.53206500 | 1.80406700 L   |
| H-H_  | -1.92913900  | 14.56943400 | 2.46766600 L   |
| C-C_R | 3.17113300   | 14.72440300 | 6.67456500 L   |
| H-H_  | 1.40002300   | 13.77614100 | 7.43884400 L   |
| H-H_  | 4.86987400   | 15.51485100 | 5.62110300 L   |
| H-H_  | -2.79834400  | 12.46255200 | 1.48880300 L   |
| H-H_  | 3.41066600   | 15.22004800 | 7.60758000 L   |
| C-C_R | -10.94551800 | 16.15549100 | -12.44201700 L |
| H-H_  | -11.89298200 | 16.67674300 | -12.37950600 L |
| C-C_R | -8.90053600  | 15.66612500 | -13.61096800 L |
| H-H_  | -8.25778700  | 15.78919600 | -14.47496700 L |
| C-C_R | -10.11926700 | 16.33478200 | -13.54669000 L |
| H-H_  | -10.42533200 | 16.98873200 | -14.35421800 L |
| C-C_R | -10.56154300 | 15.32169600 | -11.40514200 L |
| C-C_R | -9.33751400  | 14.64436800 | -11.47134900 L |
| H-H_  | -11.19613600 | 15.19451800 | -10.53759400 L |
| N-N_R | -8.94776800  | 13.78894900 | -10.42768200 L |
| C-C_R | -8.50722600  | 14.82183600 | -12.58628700 L |
| C-C_R | -9.90364700  | 12.98240900 | -9.79071300 L  |
| C-C_R | -7.60380700  | 13.73016300 | -10.02299700 L |
| H-H_  | -7.57014900  | 14.28289300 | -12.64652800 L |
| C-C_R | -9.85628100  | 12.79408200 | -8.40396600 L  |
| C-C_R | -10.92100900 | 12.36796500 | -10.53297800 L |
| C-C_R | -6.82959700  | 14.89606500 | -9.97050500 L  |
| C-C_R | -7.03100400  | 12.50427800 | -9.66793100 L  |
| H-H_  | -9.09897500  | 13.30636700 | -7.82134000 L  |
| C-C_R | -10.78823400 | 11.98891100 | -7.78208600 L  |
| H-H_  | -10.96287300 | 12.50910800 | -11.60593200 L |
| C-C_R | -11.85430200 | 11.57356600 | -9.89892600 L  |
| C-C_R | -5.50429800  | 14.82650100 | -9.57485100 L  |
| H-H_  | -7.27954100  | 15.84745200 | -10.22685900 L |
| H-H_  | -7.62522300  | 11.60129800 | -9.72271200 L  |
| C-C_R | -5.70521300  | 12.44955900 | -9.26975100 L  |
| C-C_R | -11.79066600 | 11.34828800 | -8.51909100 L  |
| H-H_  | -10.75721200 | 11.87217400 | -6.70555300 L  |
| H-H_  | -12.65431400 | 11.11122300 | -10.46308700 L |
| H-H_  | -4.91634300  | 15.73625900 | -9.52938700 L  |
| C-C_R | -4.93572300  | 13.60685100 | -9.22313900 L  |
| H-H_  | -5.27009400  | 11.49364800 | -9.00371400 L  |
| C-C_R | -12.83585200 | 10.52080800 | -7.87466100 L  |

|       |              |             |                |
|-------|--------------|-------------|----------------|
| H-H_  | -3.89864300  | 13.56049500 | -8.91476300 L  |
| N-N_R | -14.04449200 | 10.67880200 | -8.39667900 L  |
| C-C_R | -12.62330300 | 9.67339300  | -6.76270700 L  |
| C-C_R | -15.08849000 | 10.10266800 | -7.78978300 L  |
| N-N_R | -13.66872100 | 9.17123700  | -6.10296900 L  |
| C-C_R | -11.30227000 | 9.24427200  | -6.26621900 L  |
| C-C_R | -14.89052000 | 9.39563000  | -6.57083800 L  |
| C-C_R | -16.39547500 | 10.23791300 | -8.33864800 L  |
| C-C_R | -10.22345400 | 8.99842300  | -7.12359900 L  |
| C-C_R | -11.12981000 | 8.99602200  | -4.90048700 L  |
| C-C_R | -16.03808900 | 8.89908500  | -5.87268500 L  |
| C-C_R | -17.50956500 | 9.69797100  | -7.65722400 L  |
| C-C_R | -16.52690600 | 10.99010500 | -9.53427600 L  |
| C-C_R | -9.00733300  | 8.56439000  | -6.63399100 L  |
| H-H_  | -10.34859300 | 9.11735600  | -8.19428700 L  |
| H-H_  | -11.97065800 | 9.14512200  | -4.23549100 L  |
| C-C_R | -9.91301000  | 8.57204100  | -4.40080300 L  |
| C-C_R | -17.29617900 | 9.06756900  | -6.41543000 L  |
| C-C_R | -15.86447700 | 8.20253200  | -4.64647800 L  |
| N-N_R | -16.62497700 | 11.60544800 | -10.51295100 L |
| H-H_  | -8.18843000  | 8.35452900  | -7.31212400 L  |
| C-C_R | -8.83132800  | 8.35875600  | -5.26089000 L  |
| H-H_  | -9.79027400  | 8.40644700  | -3.33690200 L  |
| H-H_  | -18.14598300 | 8.65609800  | -5.88734900 L  |
| N-N_R | -15.73585000 | 7.63119700  | -3.64538300 L  |
| N-N_R | -7.59126800  | 7.92761800  | -4.76208800 L  |
| C-C_R | -6.40187100  | 8.47319100  | -5.27753800 L  |
| C-C_R | -7.54068200  | 6.95348200  | -3.74355000 L  |
| C-C_R | -6.32294900  | 9.83878000  | -5.57009900 L  |
| C-C_R | -5.28277200  | 7.66432000  | -5.49833300 L  |
| C-C_R | -6.60587800  | 7.05736900  | -2.71038400 L  |
| C-C_R | -8.43195100  | 5.87700000  | -3.75596500 L  |
| H-H_  | -7.18289300  | 10.47145500 | -5.38813000 L  |
| C-C_R | -5.14926800  | 10.37671000 | -6.07517600 L  |
| H-H_  | -5.34349100  | 6.60473300  | -5.28002300 L  |
| C-C_R | -4.11246200  | 8.21346300  | -5.99620600 L  |
| H-H_  | -5.92359000  | 7.89947700  | -2.68955000 L  |
| C-C_R | -6.56277400  | 6.09528000  | -1.71368300 L  |
| H-H_  | -9.15258800  | 5.79015200  | -4.56053500 L  |
| C-C_R | -8.38825800  | 4.92774100  | -2.74689200 L  |
| H-H_  | -5.10165600  | 11.43989800 | -6.28398500 L  |
| C-C_R | -4.03629200  | 9.57188700  | -6.28847900 L  |
| H-H_  | -3.25418300  | 7.57222700  | -6.16396400 L  |
| C-C_R | -7.45333900  | 5.02757600  | -1.72319000 L  |

|       |              |             |                |
|-------|--------------|-------------|----------------|
| H-H_  | -5.83642400  | 6.19001000  | -0.91537600 L  |
| H-H_  | -9.08603400  | 4.09933700  | -2.76923700 L  |
| H-H_  | -3.11650100  | 9.99623800  | -6.67393600 L  |
| H-H_  | -7.42132300  | 4.28194700  | -0.93741900 L  |
| C-C_R | -27.64816000 | 5.55564700  | -14.21206200 L |
| H-H_  | -26.89589600 | 4.79647400  | -14.39327000 L |
| C-C_R | -29.55990400 | 6.81419400  | -14.93130000 L |
| H-H_  | -30.30273200 | 7.05409400  | -15.68308300 L |
| C-C_R | -28.59930200 | 5.84121300  | -15.18402800 L |
| H-H_  | -28.59059800 | 5.31319000  | -16.12997600 L |
| C-C_R | -27.65798800 | 6.22396100  | -12.99736800 L |
| C-C_R | -28.61698000 | 7.20815100  | -12.74550900 L |
| H-H_  | -26.92234500 | 5.98996000  | -12.23689200 L |
| N-N_R | -28.62547300 | 7.89697600  | -11.51464400 L |
| C-C_R | -29.56838900 | 7.50070300  | -13.72681000 L |
| C-C_R | -27.41732400 | 8.30659500  | -10.92730900 L |
| C-C_R | -29.85079200 | 8.19443900  | -10.88527000 L |
| H-H_  | -30.30796600 | 8.26965500  | -13.53864600 L |
| C-C_R | -27.24717900 | 8.24220100  | -9.54067500 L  |
| C-C_R | -26.36128200 | 8.78089800  | -11.71362300 L |
| C-C_R | -30.88060400 | 7.24984100  | -10.85713200 L |
| C-C_R | -30.05445600 | 9.44060800  | -10.28758000 L |
| H-H_  | -28.04308500 | 7.84161000  | -8.92435800 L  |
| C-C_R | -26.06866500 | 8.66932300  | -8.95738700 L  |
| H-H_  | -26.47705300 | 8.83127300  | -12.78939800 L |
| C-C_R | -25.17893300 | 9.18444100  | -11.12473800 L |
| C-C_R | -32.08816900 | 7.55305600  | -10.24839000 L |
| H-H_  | -30.72317000 | 6.28035600  | -11.31453700 L |
| H-H_  | -29.26266300 | 10.17971400 | -10.31420300 L |
| C-C_R | -31.26154800 | 9.73087100  | -9.67011800 L  |
| C-C_R | -25.01629600 | 9.16368500  | -9.73458100 L  |
| H-H_  | -25.95592800 | 8.59087100  | -7.88347000 L  |
| H-H_  | -24.35824700 | 9.53431000  | -11.73837700 L |
| H-H_  | -32.87682700 | 6.80921200  | -10.23333100 L |
| C-C_R | -32.28754900 | 8.79120600  | -9.64954000 L  |
| H-H_  | -31.40410000 | 10.70396100 | -9.21344200 L  |
| C-C_R | -23.72620600 | 9.57586600  | -9.15453700 L  |
| H-H_  | -33.23286300 | 9.02353500  | -9.17338000 L  |
| N-N_R | -22.66080400 | 9.29376300  | -9.88889000 L  |
| C-C_R | -23.56629300 | 10.20209100 | -7.87486600 L  |
| C-C_R | -21.44857500 | 9.49354200  | -9.37238300 L  |
| N-N_R | -22.36899000 | 10.31505500 | -7.33098800 L  |
| C-C_R | -24.66741800 | 10.79684500 | -7.09210300 L  |
| C-C_R | -21.29309300 | 9.93466300  | -8.03528800 L  |

|       |              |             |                |
|-------|--------------|-------------|----------------|
| C-C_R | -20.27861800 | 9.22303700  | -10.14541100 L |
| C-C_R | -25.74174700 | 11.46141800 | -7.69263800 L  |
| C-C_R | -24.60178700 | 10.77509700 | -5.69540400 L  |
| C-C_R | -19.99605500 | 10.03068300 | -7.45960000 L  |
| C-C_R | -19.03254400 | 9.34577400  | -9.57269000 L  |
| C-C_R | -20.41237200 | 8.78908000  | -11.49598200 L |
| C-C_R | -26.72784200 | 12.05592800 | -6.92771500 L  |
| H-H_  | -25.79344400 | 11.53940900 | -8.77100800 L  |
| H-H_  | -23.75529900 | 10.29384800 | -5.22238500 L  |
| C-C_R | -25.59606800 | 11.34650500 | -4.92375500 L  |
| C-C_R | -18.85544000 | 9.71273200  | -8.22123000 L  |
| C-C_R | -19.90131600 | 10.52059100 | -6.12817100 L  |
| H-H_  | -18.16134500 | 9.10603200  | -10.16776700 L |
| N-N_R | -20.49512700 | 8.43364800  | -12.59553500 L |
| H-H_  | -27.54197100 | 12.58442100 | -7.40915600 L  |
| C-C_R | -26.67973900 | 11.99135800 | -5.53128200 L  |
| H-H_  | -25.54226800 | 11.29456800 | -3.84372800 L  |
| N-N_R | -19.82222400 | 10.92273300 | -5.04390400 L  |
| N-N_R | -27.69827300 | 12.56978500 | -4.75775300 L  |
| C-C_R | -29.04023200 | 12.48273300 | -5.18144500 L  |
| C-C_R | -27.38817400 | 13.21693100 | -3.54323000 L  |
| C-C_R | -29.53300600 | 11.29841600 | -5.73320500 L  |
| C-C_R | -29.89537500 | 13.57917900 | -5.04739200 L  |
| C-C_R | -28.20467900 | 13.04639700 | -2.42264000 L  |
| C-C_R | -26.25855900 | 14.03451100 | -3.44731500 L  |
| H-H_  | -28.87422700 | 10.44287400 | -5.83022800 L  |
| C-C_R | -30.85408500 | 11.21604200 | -6.14649600 L  |
| H-H_  | -29.51594300 | 14.50136400 | -4.62537400 L  |
| C-C_R | -31.21901400 | 13.48474400 | -5.45185200 L  |
| H-H_  | -29.07623100 | 12.40684400 | -2.49084700 L  |
| C-C_R | -27.89959700 | 13.69194600 | -1.23338100 L  |
| H-H_  | -25.62635400 | 14.17276000 | -4.31572100 L  |
| C-C_R | -25.95275900 | 14.66004800 | -2.24905700 L  |
| H-H_  | -31.21928700 | 10.28738300 | -6.56926900 L  |
| C-C_R | -31.70598100 | 12.30591100 | -6.00610200 L  |
| H-H_  | -31.87086500 | 14.34338200 | -5.34349800 L  |
| C-C_R | -26.77059300 | 14.49835200 | -1.13659900 L  |
| H-H_  | -28.54170300 | 13.55008900 | -0.37232000 L  |
| H-H_  | -25.07184600 | 15.28869700 | -2.18906600 L  |
| H-H_  | -32.74006400 | 12.23639800 | -6.32136600 L  |
| H-H_  | -26.53106000 | 14.99399600 | -0.20358400 L  |
| C-C_R | 18.94740500  | 17.19199600 | -12.52420500 L |
| H-H_  | 17.99894100  | 17.71321400 | -12.46169100 L |
| C-C_R | 20.99138700  | 16.70259600 | -13.69315300 L |

|       |             |             |                |
|-------|-------------|-------------|----------------|
| H-H_  | 21.63413700 | 16.82566600 | -14.55715300 L |
| C-C_R | 19.77265600 | 17.37125200 | -13.62887500 L |
| H-H_  | 19.46659100 | 18.02520200 | -14.43640400 L |
| C-C_R | 19.33137900 | 16.35820100 | -11.48733000 L |
| C-C_R | 20.55540800 | 15.68087300 | -11.55353700 L |
| H-H_  | 18.69578700 | 16.23098800 | -10.61978000 L |
| N-N_R | 20.94415500 | 14.82542000 | -10.50986800 L |
| C-C_R | 21.38469700 | 15.85830600 | -12.66847200 L |
| C-C_R | 19.98827700 | 14.01887900 | -9.87289900 L  |
| C-C_R | 22.28811700 | 14.76663300 | -10.10518300 L |
| H-H_  | 22.32177400 | 15.31936300 | -12.72871300 L |
| C-C_R | 20.03664100 | 13.83058700 | -8.48615400 L  |
| C-C_R | 18.97091500 | 13.40443600 | -10.61516400 L |
| C-C_R | 23.06232700 | 15.93253500 | -10.05269000 L |
| C-C_R | 22.86091900 | 13.54074800 | -9.75011600 L  |
| H-H_  | 20.79294800 | 14.34283800 | -7.90352500 L  |
| C-C_R | 19.10368900 | 13.02538200 | -7.86427200 L  |
| H-H_  | 18.93004900 | 13.54561300 | -11.68812100 L |
| C-C_R | 18.03762100 | 12.61003700 | -9.98111200 L  |
| C-C_R | 24.38762500 | 15.86297100 | -9.65703600 L  |
| H-H_  | 22.61238200 | 16.88392300 | -10.30904500 L |
| H-H_  | 22.26670000 | 12.63776800 | -9.80489800 L  |
| C-C_R | 24.18671000 | 13.48602900 | -9.35193600 L  |
| C-C_R | 18.10125800 | 12.38475800 | -8.60127700 L  |
| H-H_  | 19.13471100 | 12.90864500 | -6.78773800 L  |
| H-H_  | 17.23760900 | 12.14769400 | -10.54527200 L |
| H-H_  | 24.97558000 | 16.77273000 | -9.61157200 L  |
| C-C_R | 24.95620000 | 14.64332100 | -9.30532400 L  |
| H-H_  | 24.62183000 | 12.53011800 | -9.08590000 L  |
| C-C_R | 17.05607100 | 11.55727900 | -7.95684700 L  |
| H-H_  | 25.99428000 | 14.59700000 | -8.99695200 L  |
| N-N_R | 15.84743100 | 11.71527200 | -8.47886500 L  |
| C-C_R | 17.26862100 | 10.70986300 | -6.84489200 L  |
| C-C_R | 14.80343300 | 11.13913900 | -7.87196800 L  |
| N-N_R | 16.22320300 | 10.20770800 | -6.18515400 L  |
| C-C_R | 18.58965300 | 10.28074200 | -6.34840500 L  |
| C-C_R | 15.00140300 | 10.43210000 | -6.65302400 L  |
| C-C_R | 13.49644800 | 11.27438400 | -8.42083300 L  |
| C-C_R | 19.66846900 | 10.03489300 | -7.20578500 L  |
| C-C_R | 18.76211300 | 10.03249300 | -4.98267300 L  |
| C-C_R | 13.85383400 | 9.93555500  | -5.95487000 L  |
| C-C_R | 12.38235800 | 10.73444100 | -7.73941000 L  |
| C-C_R | 13.36501800 | 12.02657600 | -9.61646100 L  |
| C-C_R | 20.88459000 | 9.60086000  | -6.71617700 L  |

|       |             |             |                |
|-------|-------------|-------------|----------------|
| H-H_  | 19.54333000 | 10.15382700 | -8.27647300 L  |
| H-H_  | 17.92126500 | 10.18159300 | -4.31767700 L  |
| C-C_R | 19.97891400 | 9.60851100  | -4.48298900 L  |
| C-C_R | 12.59574400 | 10.10404000 | -6.49761500 L  |
| C-C_R | 14.02744600 | 9.23900200  | -4.72866400 L  |
| N-N_R | 13.26694600 | 12.64191800 | -10.59513700 L |
| H-H_  | 21.70349400 | 9.39099900  | -7.39430900 L  |
| C-C_R | 21.06059500 | 9.39522700  | -5.34307600 L  |
| H-H_  | 20.10164900 | 9.44291700  | -3.41908700 L  |
| H-H_  | 11.74694000 | 9.69260300  | -5.96953700 L  |
| N-N_R | 14.15607300 | 8.66766700  | -3.72756800 L  |
| N-N_R | 22.30165500 | 8.96412300  | -4.84427600 L  |
| C-C_R | 23.49105100 | 9.50969600  | -5.35972600 L  |
| C-C_R | 22.35124100 | 7.98995200  | -3.82573500 L  |
| C-C_R | 23.56897400 | 10.87525000 | -5.65228400 L  |
| C-C_R | 24.60915100 | 8.70079000  | -5.58051800 L  |
| C-C_R | 23.28604500 | 8.09383900  | -2.79256900 L  |
| C-C_R | 21.45997200 | 6.91347000  | -3.83815000 L  |
| H-H_  | 22.70903000 | 11.50792600 | -5.47031500 L  |
| C-C_R | 24.74265500 | 11.41318000 | -6.15736200 L  |
| H-H_  | 24.54843200 | 7.64120400  | -5.36220900 L  |
| C-C_R | 25.77946100 | 9.24993300  | -6.07839200 L  |
| H-H_  | 23.96833300 | 8.93594800  | -2.77173600 L  |
| C-C_R | 23.32914900 | 7.13175100  | -1.79586800 L  |
| H-H_  | 20.73933500 | 6.82662200  | -4.64272000 L  |
| C-C_R | 21.50366600 | 5.96421100  | -2.82907800 L  |
| H-H_  | 24.79026700 | 12.47636800 | -6.36617100 L  |
| C-C_R | 25.85563100 | 10.60835700 | -6.37066500 L  |
| H-H_  | 26.63774000 | 8.60869800  | -6.24615000 L  |
| C-C_R | 22.43858400 | 6.06404600  | -1.80537600 L  |
| H-H_  | 24.05549900 | 7.22648000  | -0.99756200 L  |
| H-H_  | 20.80588900 | 5.13580700  | -2.85142200 L  |
| H-H_  | 26.77542300 | 11.03270800 | -6.75612100 L  |
| H-H_  | 22.47060100 | 5.31841700  | -1.01960500 L  |
| C-C_R | 2.24376300  | 6.59211700  | -14.29424700 L |
| H-H_  | 2.99602700  | 5.83294500  | -14.47545600 L |
| C-C_R | 0.33201900  | 7.85066400  | -15.01348600 L |
| H-H_  | -0.41080900 | 8.09056400  | -15.76526800 L |
| C-C_R | 1.29262200  | 6.87768300  | -15.26621400 L |
| H-H_  | 1.30132500  | 6.34966000  | -16.21216200 L |
| C-C_R | 2.23393600  | 7.26043100  | -13.07955300 L |
| C-C_R | 1.27494300  | 8.24462100  | -12.82769500 L |
| H-H_  | 2.96957900  | 7.02643100  | -12.31907800 L |
| N-N_R | 1.26645000  | 8.93344600  | -11.59683000 L |



|       |             |             |                |
|-------|-------------|-------------|----------------|
| C-C_R | 0.32353400  | 8.53717400  | -13.80899500 L |
| C-C_R | 2.47460000  | 9.34306500  | -11.00949400 L |
| C-C_R | 0.04113100  | 9.23090900  | -10.96745500 L |
| H-H_  | -0.41604300 | 9.30612600  | -13.62083100 L |
| C-C_R | 2.64474400  | 9.27867100  | -9.62286000 L  |
| C-C_R | 3.53064100  | 9.81736900  | -11.79580800 L |
| C-C_R | -0.98868100 | 8.28631200  | -10.93931800 L |
| C-C_R | -0.16253300 | 10.47707800 | -10.36976600 L |
| H-H_  | 1.84883800  | 8.87808000  | -9.00654300 L  |
| C-C_R | 3.82325800  | 9.70579300  | -9.03957300 L  |
| H-H_  | 3.41487000  | 9.86774300  | -12.87158300 L |
| C-C_R | 4.71299000  | 10.22091200 | -11.20692300 L |
| C-C_R | -2.19624500 | 8.58952600  | -10.33057600 L |
| H-H_  | -0.83124700 | 7.31682700  | -11.39672200 L |
| H-H_  | 0.62926000  | 11.21618500 | -10.39638800 L |
| C-C_R | -1.36962500 | 10.76734200 | -9.75230300 L  |
| C-C_R | 4.87562700  | 10.20015500 | -9.81676700 L  |
| H-H_  | 3.93599600  | 9.62734100  | -7.96565600 L  |
| H-H_  | 5.53367600  | 10.57078000 | -11.82056200 L |
| H-H_  | -2.98490400 | 7.84568300  | -10.31551700 L |
| C-C_R | -2.39562600 | 9.82767600  | -9.73172600 L  |
| H-H_  | -1.51117700 | 11.74046600 | -9.29563100 L  |
| C-C_R | 6.16671700  | 10.61237100 | -9.23672500 L  |
| H-H_  | -3.34094000 | 10.06000500 | -9.25556500 L  |
| N-N_R | 7.23111900  | 10.33023300 | -9.97107600 L  |
| C-C_R | 6.32563000  | 11.23856200 | -7.95705100 L  |
| C-C_R | 8.44434800  | 10.53004700 | -9.45457200 L  |
| N-N_R | 7.52293400  | 11.35152500 | -7.41317400 L  |
| C-C_R | 5.22450500  | 11.83331600 | -7.17428800 L  |
| C-C_R | 8.59883000  | 10.97113300 | -8.11747400 L  |
| C-C_R | 9.61330500  | 10.25950800 | -10.22759700 L |
| C-C_R | 4.15017600  | 12.49788800 | -7.77482300 L  |
| C-C_R | 5.29013600  | 11.81156800 | -5.77759000 L  |
| C-C_R | 9.89586900  | 11.06715300 | -7.54178600 L  |
| C-C_R | 10.85937900 | 10.38224500 | -9.65487600 L  |
| C-C_R | 9.47955100  | 9.82555000  | -11.57816700 L |
| C-C_R | 3.16408100  | 13.09239800 | -7.00990100 L  |
| H-H_  | 4.09848000  | 12.57588000 | -8.85319400 L  |
| H-H_  | 6.13662400  | 11.33031800 | -5.30457100 L  |
| C-C_R | 4.29585500  | 12.38297500 | -5.00594000 L  |
| C-C_R | 11.03648300 | 10.74920200 | -8.30341500 L  |
| C-C_R | 9.99160700  | 11.55709600 | -6.21035900 L  |
| H-H_  | 11.73057800 | 10.14250200 | -10.24995300 L |
| N-N_R | 9.39679700  | 9.47011900  | -12.67772000 L |

|       |              |              |               |
|-------|--------------|--------------|---------------|
| H-H_  | 2.35095100   | 13.62092600  | -7.49134500 L |
| C-C_R | 3.21218400   | 13.02782800  | -5.61346700 L |
| H-H_  | 4.34965500   | 12.33103800  | -3.92591300 L |
| N-N_R | 10.07069900  | 11.95923800  | -5.12609300 L |
| N-N_R | 2.19365000   | 13.60625500  | -4.83993800 L |
| C-C_R | 0.85169200   | 13.51920400  | -5.26363100 L |
| C-C_R | 2.50374900   | 14.25340100  | -3.62541500 L |
| C-C_R | 0.35891800   | 12.33488600  | -5.81539100 L |
| C-C_R | -0.00345200  | 14.61565000  | -5.12957700 L |
| C-C_R | 1.68724400   | 14.08286700  | -2.50482600 L |
| C-C_R | 3.63336400   | 15.07098100  | -3.52950100 L |
| H-H_  | 1.01769600   | 11.47934400  | -5.91241300 L |
| C-C_R | -0.96116200  | 12.25254700  | -6.22868500 L |
| H-H_  | 0.37598000   | 15.53783400  | -4.70755900 L |
| C-C_R | -1.32709100  | 14.52121400  | -5.53403800 L |
| H-H_  | 0.81569300   | 13.44331500  | -2.57303300 L |
| C-C_R | 1.99232600   | 14.72841700  | -1.31556700 L |
| H-H_  | 4.26556900   | 15.20923100  | -4.39790700 L |
| C-C_R | 3.93916500   | 15.69651800  | -2.33124300 L |
| H-H_  | -1.32736300  | 11.32385300  | -6.65145500 L |
| C-C_R | -1.81405800  | 13.34238200  | -6.08828700 L |
| H-H_  | -1.97894200  | 15.37985200  | -5.42568300 L |
| C-C_R | 3.12133000   | 15.53482200  | -1.21878500 L |
| H-H_  | 1.35022000   | 14.58655900  | -0.45450500 L |
| H-H_  | 4.82007700   | 16.32516700  | -2.27125100 L |
| H-H_  | -2.84814100  | 13.27286800  | -6.40355100 L |
| H-H_  | 3.36086300   | 16.03046700  | -0.28577000 L |
| C-C_R | -34.58469800 | -7.44018000  | 15.37950700 L |
| H-H_  | -33.67531600 | -6.85403200  | 15.43194000 L |
| C-C_R | -36.58344800 | -8.29503000  | 16.41116000 L |
| H-H_  | -37.22601900 | -8.39420600  | 17.27761200 L |
| C-C_R | -35.41347900 | -7.54590200  | 16.49175000 L |
| H-H_  | -35.14696600 | -7.04970300  | 17.41862000 L |
| C-C_R | -34.91833800 | -8.06990100  | 14.19305900 L |
| C-C_R | -36.09299600 | -8.82815000  | 14.11156200 L |
| H-H_  | -34.28265100 | -7.97453600  | 13.32223800 L |
| N-N_R | -36.43098400 | -9.47779800  | 12.91203700 L |
| C-C_R | -36.92464400 | -8.93698500  | 15.23355600 L |
| C-C_R | -35.42695900 | -10.07114700 | 12.13204200 L |
| C-C_R | -37.77066600 | -9.54338400  | 12.49556100 L |
| H-H_  | -37.82343600 | -9.54037500  | 15.17627100 L |
| C-C_R | -35.47111100 | -9.97627200  | 10.73567900 L |
| C-C_R | -34.36501900 | -10.75299500 | 12.73992900 L |
| C-C_R | -38.62166000 | -8.44752200  | 12.67577100 L |

|       |              |              |               |
|-------|--------------|--------------|---------------|
| C-C_R | -38.26124000 | -10.70847100 | 11.89449200 L |
| H-H_  | -36.26558800 | -9.40779500  | 10.26324500 L |
| C-C_R | -34.48998400 | -10.57184800 | 9.96967300 L  |
| H-H_  | -34.32533700 | -10.83061300 | 13.82042400 L |
| C-C_R | -33.38433800 | -11.33651200 | 11.96410600 L |
| C-C_R | -39.94289700 | -8.52512900  | 12.26498100 L |
| H-H_  | -38.23669100 | -7.53875500  | 13.12251400 L |
| H-H_  | -37.60667500 | -11.56019600 | 11.76873600 L |
| C-C_R | -39.58300300 | -10.77096200 | 11.48324700 L |
| C-C_R | -33.44115600 | -11.28030900 | 10.56787400 L |
| H-H_  | -34.52149300 | -10.47005800 | 8.89160800 L  |
| H-H_  | -32.54981900 | -11.84841800 | 12.42802100 L |
| H-H_  | -40.59164300 | -7.66725900  | 12.40138500 L |
| C-C_R | -40.42972300 | -9.68253200  | 11.66869900 L |
| H-H_  | -39.95297500 | -11.68017600 | 11.02631100 L |
| C-C_R | -32.34767300 | -11.88635100 | 9.77495200 L  |
| H-H_  | -41.46335000 | -9.73658800  | 11.34999200 L |
| N-N_R | -31.14894200 | -11.75613800 | 10.32762800 L |
| C-C_R | -32.50989400 | -12.50235000 | 8.51243000 L  |
| C-C_R | -30.07246200 | -12.12446400 | 9.62355900 L  |
| N-N_R | -31.43739700 | -12.78757400 | 7.77168000 L  |
| C-C_R | -33.80213200 | -12.91041900 | 7.93081100 L  |
| C-C_R | -30.23043600 | -12.58049800 | 8.28394300 L  |
| C-C_R | -28.77389500 | -12.01504100 | 10.19659200 L |
| C-C_R | -34.85475000 | -13.39723700 | 8.71280200 L  |
| C-C_R | -33.96687100 | -12.88675000 | 6.54096700 L  |
| C-C_R | -29.05571200 | -12.84445600 | 7.50753600 L  |
| C-C_R | -27.63050300 | -12.32710000 | 9.42750700 L  |
| C-C_R | -28.68553800 | -11.51468500 | 11.52209700 L |
| C-C_R | -36.04291100 | -13.80529800 | 8.13655900 L  |
| H-H_  | -34.73047200 | -13.49121400 | 9.78505200 L  |
| H-H_  | -33.14181100 | -12.54767900 | 5.92619200 L  |
| C-C_R | -35.15549900 | -13.28196200 | 5.95699800 L  |
| C-C_R | -27.80921400 | -12.70488600 | 8.08298800 L  |
| C-C_R | -29.19110700 | -13.28824800 | 6.16400800 L  |
| N-N_R | -28.62268200 | -11.10603500 | 12.60612900 L |
| H-H_  | -36.84089600 | -14.20376500 | 8.75109600 L  |
| C-C_R | -36.21412900 | -13.73884800 | 6.74913700 L  |
| H-H_  | -35.27416600 | -13.23467400 | 4.88092400 L  |
| H-H_  | -26.93708400 | -12.94260500 | 7.48811300 L  |
| N-N_R | -29.28758900 | -13.65153200 | 5.06775600 L  |
| N-N_R | -37.42547600 | -14.14270800 | 6.16341900 L  |
| C-C_R | -38.64557600 | -13.79551900 | 6.77072300 L  |
| C-C_R | -37.41683800 | -14.89057100 | 4.96871300 L  |

|       |              |              |               |
|-------|--------------|--------------|---------------|
| C-C_R | -38.81509600 | -12.52666700 | 7.33534100 L  |
| C-C_R | -39.70552600 | -14.70655700 | 6.81456000 L  |
| C-C_R | -38.36374500 | -14.64252300 | 3.97175600 L  |
| C-C_R | -36.45438400 | -15.88394500 | 4.76816400 L  |
| H-H_  | -38.00144600 | -11.81324000 | 7.29187000 L  |
| C-C_R | -40.01907000 | -12.18376500 | 7.93104600 L  |
| H-H_  | -39.57443600 | -15.69306800 | 6.38673700 L  |
| C-C_R | -40.90694900 | -14.35100800 | 7.40551500 L  |
| H-H_  | -39.10183200 | -13.86215100 | 4.11785700 L  |
| C-C_R | -38.34831500 | -15.38244800 | 2.79993900 L  |
| H-H_  | -35.72390600 | -16.08331500 | 5.54228000 L  |
| C-C_R | -36.44050100 | -16.60886300 | 3.58683900 L  |
| H-H_  | -40.13738800 | -11.19101500 | 8.35138700 L  |
| C-C_R | -41.07323800 | -13.08890900 | 7.96841400 L  |
| H-H_  | -41.71844800 | -15.06989500 | 7.43433800 L  |
| C-C_R | -37.38718100 | -16.36670500 | 2.59832400 L  |
| H-H_  | -39.08499000 | -15.17694000 | 2.03252300 L  |
| H-H_  | -35.68788900 | -17.37500100 | 3.44411800 L  |
| H-H_  | -42.01603800 | -12.81521800 | 8.42467900 L  |
| H-H_  | -37.37392900 | -16.93735300 | 1.67712400 L  |
| C-C_R | -17.18816100 | -17.01695600 | 15.07361900 L |
| H-H_  | -17.88575400 | -17.84745700 | 15.09126900 L |
| C-C_R | -15.36038000 | -15.80496300 | 16.04704000 L |
| H-H_  | -14.63133900 | -15.67308000 | 16.83708100 L |
| C-C_R | -16.25185800 | -16.87105400 | 16.08997900 L |
| H-H_  | -16.21698900 | -17.58083600 | 16.90957000 L |
| C-C_R | -17.23225200 | -16.11746800 | 14.02023300 L |
| C-C_R | -16.34416400 | -15.03985800 | 13.98151500 L |
| H-H_  | -17.95558600 | -16.24136800 | 13.22293400 L |
| N-N_R | -16.39112800 | -14.11614400 | 12.91656000 L |
| C-C_R | -15.40801000 | -14.88891000 | 15.00744100 L |
| C-C_R | -17.62840800 | -13.67873300 | 12.41637400 L |
| C-C_R | -15.19333200 | -13.61330300 | 12.36952800 L |
| H-H_  | -14.72375300 | -14.04930000 | 14.98477800 L |
| C-C_R | -17.80348200 | -13.47107700 | 11.04347500 L |
| C-C_R | -18.70772500 | -13.44714300 | 13.27531000 L |
| C-C_R | -14.10187500 | -14.46118900 | 12.15696500 L |
| C-C_R | -15.07901400 | -12.26161100 | 12.03812200 L |
| H-H_  | -16.98650800 | -13.68299500 | 10.36514300 L |
| C-C_R | -19.01235700 | -13.01537800 | 10.55101900 L |
| H-H_  | -18.58913000 | -13.60879700 | 14.33863700 L |
| C-C_R | -19.91990200 | -13.01253600 | 12.77166100 L |
| C-C_R | -12.92200400 | -13.95912800 | 11.63107600 L |
| H-H_  | -14.18884000 | -15.51171400 | 12.40552300 L |

|       |              |              |               |
|-------|--------------|--------------|---------------|
| H-H_  | -15.91901500 | -11.59894200 | 12.20897100 L |
| C-C_R | -13.89779700 | -11.77042500 | 11.50105500 L |
| C-C_R | -20.09043100 | -12.76222900 | 11.40612900 L |
| H-H_  | -19.12703700 | -12.88036100 | 9.48392700 L  |
| H-H_  | -20.75812800 | -12.85239600 | 13.43777400 L |
| H-H_  | -12.08472700 | -14.62899000 | 11.47056400 L |
| C-C_R | -12.81145700 | -12.61433000 | 11.29697600 L |
| H-H_  | -13.82591800 | -10.71753800 | 11.25384000 L |
| C-C_R | -21.40958900 | -12.32926600 | 10.91203400 L |
| H-H_  | -11.88747200 | -12.22640100 | 10.88563700 L |
| N-N_R | -22.44718600 | -12.82655500 | 11.56619100 L |
| C-C_R | -21.62064400 | -11.46832000 | 9.78638000 L  |
| C-C_R | -23.67480300 | -12.60792700 | 11.09374500 L |
| N-N_R | -22.82563900 | -11.32862800 | 9.26748700 L  |
| C-C_R | -20.56804200 | -10.65224800 | 9.14776900 L  |
| C-C_R | -23.86922700 | -11.91669100 | 9.87315600 L  |
| C-C_R | -24.81820000 | -13.10978800 | 11.78630000 L |
| C-C_R | -19.53720400 | -10.05224000 | 9.87841400 L  |
| C-C_R | -20.64177000 | -10.39498500 | 7.77630800 L  |
| C-C_R | -25.17379400 | -11.79389300 | 9.31897600 L  |
| C-C_R | -26.07370400 | -12.95823700 | 11.24280500 L |
| C-C_R | -24.64580400 | -13.79934100 | 13.02228000 L |
| C-C_R | -18.59913900 | -9.25004800  | 9.25820100 L  |
| H-H_  | -19.48235300 | -10.19282900 | 10.95033800 L |
| H-H_  | -21.45687800 | -10.82627800 | 7.20839400 L  |
| C-C_R | -19.69405600 | -9.61233700  | 7.14397400 L  |
| C-C_R | -26.28482800 | -12.33599800 | 9.99312200 L  |
| C-C_R | -25.31092300 | -11.05113500 | 8.11537900 L  |
| H-H_  | -26.92240600 | -13.37265600 | 11.77057700 L |
| N-N_R | -24.53143000 | -14.36341200 | 14.02622200 L |
| H-H_  | -17.81948100 | -8.77631800  | 9.84175400 L  |
| C-C_R | -18.65150900 | -9.03234100  | 7.87751700 L  |
| H-H_  | -19.75175400 | -9.44706400  | 6.07560800 L  |
| N-N_R | -25.42479200 | -10.44210800 | 7.13414400 L  |
| N-N_R | -17.68109500 | -8.24073800  | 7.24394900 L  |
| C-C_R | -16.33339200 | -8.32070700  | 7.65045700 L  |
| C-C_R | -18.04295200 | -7.38281800  | 6.18528500 L  |
| C-C_R | -15.75739900 | -9.55619200  | 7.95324800 L  |
| C-C_R | -15.55471800 | -7.16443800  | 7.74918000 L  |
| C-C_R | -17.22463500 | -7.26497400  | 5.05927400 L  |
| C-C_R | -19.22517800 | -6.64150900  | 6.24975500 L  |
| H-H_  | -16.35582500 | -10.45545700 | 7.87072700 L  |
| C-C_R | -14.43091100 | -9.63099800  | 8.35137300 L  |
| H-H_  | -15.99990700 | -6.20370500  | 7.52089800 L  |

|       |              |              |               |
|-------|--------------|--------------|---------------|
| C-C_R | -14.22492500 | -7.24895300  | 8.13522900 L  |
| H-H_  | -16.31113100 | -7.84526500  | 5.00197300 L  |
| C-C_R | -17.58117300 | -6.41430200  | 4.02395800 L  |
| H-H_  | -19.86023500 | -6.72600600  | 7.12269300 L  |
| C-C_R | -19.58217600 | -5.80754100  | 5.20066400 L  |
| H-H_  | -14.00047400 | -10.59921100 | 8.57898000 L  |
| C-C_R | -13.65611400 | -8.47902100  | 8.44163700 L  |
| H-H_  | -13.63473400 | -6.34387100  | 8.20734100 L  |
| C-C_R | -18.76303600 | -5.68372500  | 4.08531300 L  |
| H-H_  | -16.93694700 | -6.33408300  | 3.15655500 L  |
| H-H_  | -20.50321400 | -5.24027500  | 5.26471700 L  |
| H-H_  | -12.61648500 | -8.54169800  | 8.74329500 L  |
| H-H_  | -19.04223600 | -5.02603400  | 3.26995700 L  |
| C-C_R | -4.69277500  | -6.40370900  | 15.29732200 L |
| H-H_  | -3.78339300  | -5.81756100  | 15.34975400 L |
| C-C_R | -6.69152500  | -7.25855900  | 16.32897400 L |
| H-H_  | -7.33409600  | -7.35773500  | 17.19542600 L |
| C-C_R | -5.52155600  | -6.50943100  | 16.40956400 L |
| H-H_  | -5.25504300  | -6.01323300  | 17.33643400 L |
| C-C_R | -5.02641500  | -7.03343000  | 14.11087400 L |
| C-C_R | -6.20107300  | -7.79167900  | 14.02937700 L |
| H-H_  | -4.39072800  | -6.93806500  | 13.24005300 L |
| N-N_R | -6.53806200  | -8.44129300  | 12.82984900 L |
| C-C_R | -7.03272100  | -7.90051500  | 15.15137000 L |
| C-C_R | -5.53503600  | -9.03467600  | 12.04985600 L |
| C-C_R | -7.87774300  | -8.50687900  | 12.41337300 L |
| H-H_  | -7.93151200  | -8.50390500  | 15.09408500 L |
| C-C_R | -5.57918700  | -8.93980200  | 10.65349400 L |
| C-C_R | -4.47309600  | -9.71652500  | 12.65774300 L |
| C-C_R | -8.72973600  | -7.41105100  | 12.59358500 L |
| C-C_R | -8.36931700  | -9.67200100  | 11.81230700 L |
| H-H_  | -6.37266600  | -8.37129000  | 10.18105700 L |
| C-C_R | -4.59806100  | -9.53537700  | 9.88748800 L  |
| H-H_  | -4.43341300  | -9.79414200  | 13.73823800 L |
| C-C_R | -3.49241400  | -10.30004100 | 11.88192000 L |
| C-C_R | -10.05097400 | -7.48865900  | 12.18279500 L |
| H-H_  | -8.34476800  | -6.50228500  | 13.04032800 L |
| H-H_  | -7.71375200  | -10.52369100 | 11.68654700 L |
| C-C_R | -9.69108000  | -9.73449200  | 11.40106200 L |
| C-C_R | -3.54923300  | -10.24383800 | 10.48568800 L |
| H-H_  | -4.62956900  | -9.43358800  | 8.80942300 L  |
| H-H_  | -2.65789600  | -10.81194700 | 12.34583500 L |
| H-H_  | -10.69971900 | -6.63078800  | 12.31919900 L |
| C-C_R | -10.53779900 | -8.64606200  | 11.58651300 L |

|       |              |              |               |
|-------|--------------|--------------|---------------|
| H-H_  | -10.06105200 | -10.64370500 | 10.94412500 L |
| C-C_R | -2.45575000  | -10.84988000 | 9.69276700 L  |
| H-H_  | -11.57142700 | -8.70011800  | 11.26780700 L |
| N-N_R | -1.25701900  | -10.71966800 | 10.24544300 L |
| C-C_R | -2.61797100  | -11.46587900 | 8.43024500 L  |
| C-C_R | -0.18053900  | -11.08799300 | 9.54137300 L  |
| N-N_R | -1.54447500  | -11.75106900 | 7.68949200 L  |
| C-C_R | -3.90920900  | -11.87391400 | 7.84862200 L  |
| C-C_R | -0.33851300  | -11.54402800 | 8.20175700 L  |
| C-C_R | 1.11802800   | -10.97857100 | 10.11440600 L |
| C-C_R | -4.96282700  | -12.36076600 | 8.63061700 L  |
| C-C_R | -4.07494800  | -11.85027900 | 6.45878100 L  |
| C-C_R | 0.83621100   | -11.80798600 | 7.42535000 L  |
| C-C_R | 2.26142000   | -11.29063000 | 9.34532200 L  |
| C-C_R | 1.20738400   | -10.47818000 | 11.43990900 L |
| C-C_R | -6.14998800  | -12.76879300 | 8.05437000 L  |
| H-H_  | -4.83854900  | -12.45474400 | 9.70286700 L  |
| H-H_  | -3.24988800  | -11.51120800 | 5.84400600 L  |
| C-C_R | -5.26257600  | -12.24545600 | 5.87481000 L  |
| C-C_R | 2.08270900   | -11.66841500 | 8.00080200 L  |
| C-C_R | 0.70081600   | -12.25177700 | 6.08182300 L  |
| N-N_R | 1.26924100   | -10.06956500 | 12.52394300 L |
| H-H_  | -6.94797400  | -13.16726000 | 8.66890800 L  |
| C-C_R | -6.32220600  | -12.70237700 | 6.66695200 L  |
| H-H_  | -5.38224300  | -12.19820300 | 4.79873900 L  |
| H-H_  | 2.95483900   | -11.90613500 | 7.40592700 L  |
| N-N_R | 0.60533400   | -12.61502700 | 4.98556800 L  |
| N-N_R | -7.53355300  | -13.10623800 | 6.08123300 L  |
| C-C_R | -8.75365200  | -12.75904800 | 6.68853800 L  |
| C-C_R | -7.52491500  | -13.85410100 | 4.88652700 L  |
| C-C_R | -8.92317300  | -11.49019700 | 7.25315600 L  |
| C-C_R | -9.81360200  | -13.67008600 | 6.73237400 L  |
| C-C_R | -8.47182200  | -13.60605200 | 3.88957100 L  |
| C-C_R | -6.56246100  | -14.84747400 | 4.68597800 L  |
| H-H_  | -8.10952300  | -10.77677000 | 7.20968500 L  |
| C-C_R | -10.12714600 | -11.14729400 | 7.84886100 L  |
| H-H_  | -9.68251300  | -14.65659700 | 6.30455100 L  |
| C-C_R | -11.01502600 | -13.31453700 | 7.32333000 L  |
| H-H_  | -9.20990900  | -12.82568000 | 4.03567100 L  |
| C-C_R | -8.45639200  | -14.34597800 | 2.71775300 L  |
| H-H_  | -5.83198300  | -15.04684500 | 5.46009500 L  |
| C-C_R | -6.54857800  | -15.57239300 | 3.50465300 L  |
| H-H_  | -10.24546500 | -10.15454500 | 8.26920100 L  |
| C-C_R | -11.18131500 | -12.05243900 | 7.88622900 L  |

|       |              |              |               |
|-------|--------------|--------------|---------------|
| H-H_  | -11.82652500 | -14.03342400 | 7.35215300 L  |
| C-C_R | -7.49525700  | -15.33023500 | 2.51613800 L  |
| H-H_  | -9.19306700  | -14.14046900 | 1.95033800 L  |
| H-H_  | -5.79496600  | -16.33849600 | 3.36193000 L  |
| H-H_  | -12.12411500 | -11.77874800 | 8.34249400 L  |
| H-H_  | -7.48200600  | -15.90088200 | 1.59493800 L  |
| C-C_R | 12.70376300  | -15.98048600 | 14.99143400 L |
| H-H_  | 12.00616900  | -16.81098700 | 15.00908400 L |
| C-C_R | 14.53154300  | -14.76849300 | 15.96485500 L |
| H-H_  | 15.26058400  | -14.63660900 | 16.75489500 L |
| C-C_R | 13.64006500  | -15.83458400 | 16.00779300 L |
| H-H_  | 13.67493400  | -16.54436600 | 16.82738500 L |
| C-C_R | 12.65967200  | -15.08099800 | 13.93804800 L |
| C-C_R | 13.54776000  | -14.00338800 | 13.89932900 L |
| H-H_  | 11.93633700  | -15.20489800 | 13.14074800 L |
| N-N_R | 13.50079500  | -13.07967400 | 12.83437500 L |
| C-C_R | 14.48391300  | -13.85244000 | 14.92525500 L |
| C-C_R | 12.26351600  | -12.64226300 | 12.33418900 L |
| C-C_R | 14.69859100  | -12.57683300 | 12.28734200 L |
| H-H_  | 15.16817000  | -13.01282900 | 14.90259300 L |
| C-C_R | 12.08844200  | -12.43460600 | 10.96129000 L |
| C-C_R | 11.18419800  | -12.41067300 | 13.19312400 L |
| C-C_R | 15.79004900  | -13.42471800 | 12.07478000 L |
| C-C_R | 14.81291000  | -11.22514100 | 11.95593600 L |
| H-H_  | 12.90541500  | -12.64652400 | 10.28295800 L |
| C-C_R | 10.87956600  | -11.97890800 | 10.46883400 L |
| H-H_  | 11.30279300  | -12.57232600 | 14.25645100 L |
| C-C_R | 9.97202100   | -11.97606500 | 12.68947600 L |
| C-C_R | 16.97091800  | -12.92262300 | 11.54888800 L |
| H-H_  | 15.70308300  | -14.47524400 | 12.32333800 L |
| H-H_  | 13.97290800  | -10.56247100 | 12.12678500 L |
| C-C_R | 15.99412700  | -10.73395400 | 11.41886900 L |
| C-C_R | 9.80149200   | -11.72575800 | 11.32394300 L |
| H-H_  | 10.76488600  | -11.84389100 | 9.40174200 L  |
| H-H_  | 9.13379600   | -11.81592600 | 13.35558900 L |
| H-H_  | 17.80719600  | -13.59251900 | 11.38837900 L |
| C-C_R | 17.08046600  | -11.57785900 | 11.21479000 L |
| H-H_  | 16.06600500  | -9.68106800  | 11.17165400 L |
| C-C_R | 8.48233400   | -11.29279600 | 10.82984800 L |
| H-H_  | 18.00545100  | -11.18989500 | 10.80344900 L |
| N-N_R | 7.44473700   | -11.79008500 | 11.48400500 L |
| C-C_R | 8.27127900   | -10.43184900 | 9.70419500 L  |
| C-C_R | 6.21712100   | -11.57145700 | 11.01155900 L |
| N-N_R | 7.06628400   | -10.29215700 | 9.18530100 L  |



|       |             |              |               |
|-------|-------------|--------------|---------------|
| C-C_R | 9.32388100  | -9.61577800  | 9.06558300 L  |
| C-C_R | 6.02269600  | -10.88022100 | 9.79097000 L  |
| C-C_R | 5.07372300  | -12.07331700 | 11.70411500 L |
| C-C_R | 10.35571900 | -9.01573500  | 9.79622600 L  |
| C-C_R | 9.25015300  | -9.35851400  | 7.69412200 L  |
| C-C_R | 4.71812900  | -10.75742200 | 9.23679100 L  |
| C-C_R | 3.81822000  | -11.92176600 | 11.16062000 L |
| C-C_R | 5.24611900  | -12.76287100 | 12.94009500 L |
| C-C_R | 11.29278400 | -8.21357700  | 9.17601500 L  |
| H-H_  | 10.40957000 | -9.15635900  | 10.86815200 L |
| H-H_  | 8.43504600  | -9.78980800  | 7.12620800 L  |
| C-C_R | 10.19886700 | -8.57583200  | 7.06178600 L  |
| C-C_R | 3.60709600  | -11.29952800 | 9.91093600 L  |
| C-C_R | 4.58100000  | -10.01466500 | 8.03319300 L  |
| H-H_  | 2.96951800  | -12.33618600 | 11.68839100 L |
| N-N_R | 5.36049300  | -13.32694200 | 13.94403700 L |
| H-H_  | 12.07244200 | -7.73984700  | 9.75956800 L  |
| C-C_R | 11.24041400 | -7.99587100  | 7.79533200 L  |
| H-H_  | 10.14017000 | -8.41059400  | 5.99342300 L  |
| N-N_R | 4.46713100  | -9.40563700  | 7.05195900 L  |
| N-N_R | 12.21082900 | -7.20426800  | 7.16176400 L  |
| C-C_R | 13.55853100 | -7.28423700  | 7.56827100 L  |
| C-C_R | 11.84897100 | -6.34634700  | 6.10309900 L  |
| C-C_R | 14.13452500 | -8.51972200  | 7.87106300 L  |
| C-C_R | 14.33720500 | -6.12796700  | 7.66699500 L  |
| C-C_R | 12.66728800 | -6.22850400  | 4.97708800 L  |
| C-C_R | 10.66674600 | -5.60503900  | 6.16756900 L  |
| H-H_  | 13.53609800 | -9.41898700  | 7.78854200 L  |
| C-C_R | 15.46101200 | -8.59452800  | 8.26918700 L  |
| H-H_  | 13.89201600 | -5.16723400  | 7.43871200 L  |
| C-C_R | 15.66699800 | -6.21248200  | 8.05304300 L  |
| H-H_  | 13.58079200 | -6.80879500  | 4.91978800 L  |
| C-C_R | 12.31075000 | -5.37783200  | 3.94177300 L  |
| H-H_  | 10.03168800 | -5.68953500  | 7.04050700 L  |
| C-C_R | 10.30974800 | -4.77107100  | 5.11847800 L  |
| H-H_  | 15.89144900 | -9.56274000  | 8.49679500 L  |
| C-C_R | 16.23580900 | -7.44255100  | 8.35945200 L  |
| H-H_  | 16.25718900 | -5.30740000  | 8.12515500 L  |
| C-C_R | 11.12988700 | -4.64722000  | 4.00312500 L  |
| H-H_  | 12.95497600 | -5.29761300  | 3.07436900 L  |
| H-H_  | 9.38871000  | -4.20380500  | 5.18253100 L  |
| H-H_  | 17.27543800 | -7.50522700  | 8.66110900 L  |
| H-H_  | 10.84968700 | -3.98956400  | 3.18777200 L  |
| C-C_R | 25.19914900 | -5.36723900  | 15.21513600 L |

|       |             |              |               |
|-------|-------------|--------------|---------------|
| H-H_  | 26.10853000 | -4.78109100  | 15.26756900 L |
| C-C_R | 23.20039800 | -6.22208900  | 16.24678900 L |
| H-H_  | 22.55782800 | -6.32126500  | 17.11324100 L |
| C-C_R | 24.37036700 | -5.47296100  | 16.32737900 L |
| H-H_  | 24.63688100 | -4.97676200  | 17.25424900 L |
| C-C_R | 24.86550900 | -5.99696000  | 14.02868800 L |
| C-C_R | 23.69085000 | -6.75520900  | 13.94719100 L |
| H-H_  | 25.50119500 | -5.90159500  | 13.15786700 L |
| N-N_R | 23.35386200 | -7.40482300  | 12.74766400 L |
| C-C_R | 22.85920200 | -6.86404400  | 15.06918500 L |
| C-C_R | 24.35788600 | -7.99817100  | 11.96766800 L |
| C-C_R | 22.01418000 | -7.47040900  | 12.33118700 L |
| H-H_  | 21.96141000 | -7.46740000  | 15.01189700 L |
| C-C_R | 24.31273600 | -7.90333100  | 10.57130800 L |
| C-C_R | 25.41882700 | -8.68005400  | 12.57555800 L |
| C-C_R | 21.16218700 | -6.37458100  | 12.51140000 L |
| C-C_R | 21.52260700 | -8.63553000  | 11.73012100 L |
| H-H_  | 23.51925800 | -7.33482000  | 10.09887200 L |
| C-C_R | 25.29386200 | -8.49890700  | 9.80530200 L  |
| H-H_  | 25.45851000 | -8.75767200  | 13.65605300 L |
| C-C_R | 26.40050800 | -9.26353600  | 11.79973200 L |
| C-C_R | 19.84094900 | -6.45218800  | 12.10061000 L |
| H-H_  | 21.54715600 | -5.46581400  | 12.95814300 L |
| H-H_  | 22.17817100 | -9.48722000  | 11.60436200 L |
| C-C_R | 20.20184300 | -8.69798600  | 11.31887300 L |
| C-C_R | 26.34269000 | -9.20736800  | 10.40350300 L |
| H-H_  | 25.26235400 | -8.39711700  | 8.72723700 L  |
| H-H_  | 27.23402700 | -9.77547700  | 12.26365000 L |
| H-H_  | 19.19220400 | -5.59431800  | 12.23701400 L |
| C-C_R | 19.35412400 | -7.60959200  | 11.50432700 L |
| H-H_  | 19.83087100 | -9.60723500  | 10.86194000 L |
| C-C_R | 27.43617400 | -9.81341000  | 9.61058100 L  |
| H-H_  | 18.32049700 | -7.66364700  | 11.18562100 L |
| N-N_R | 28.63490400 | -9.68319700  | 10.16325700 L |
| C-C_R | 27.27395300 | -10.42940900 | 8.34805900 L  |
| C-C_R | 29.71238300 | -10.05148800 | 9.45918500 L  |
| N-N_R | 28.34744900 | -10.71459900 | 7.60730600 L  |
| C-C_R | 25.98271400 | -10.83744400 | 7.76643700 L  |
| C-C_R | 29.55341100 | -10.50755700 | 8.11957200 L  |
| C-C_R | 31.00995200 | -9.94210000  | 10.03222100 L |
| C-C_R | 24.92909700 | -11.32429600 | 8.54843100 L  |
| C-C_R | 25.81697600 | -10.81380900 | 6.37659600 L  |
| C-C_R | 30.72813400 | -10.77151600 | 7.34316500 L  |
| C-C_R | 32.15334300 | -10.25415900 | 9.26313600 L  |

|       |             |              |               |
|-------|-------------|--------------|---------------|
| C-C_R | 31.09930800 | -9.44170900  | 11.35772300 L |
| C-C_R | 23.74193500 | -11.73232200 | 7.97218500 L  |
| H-H_  | 25.05337500 | -11.41827300 | 9.62068100 L  |
| H-H_  | 26.64203500 | -10.47473800 | 5.76182100 L  |
| C-C_R | 24.62934700 | -11.20898600 | 5.79262400 L  |
| C-C_R | 31.97463200 | -10.63194500 | 7.91861700 L  |
| C-C_R | 30.59273900 | -11.21530700 | 5.99963700 L  |
| N-N_R | 31.16116400 | -9.03309500  | 12.44175800 L |
| H-H_  | 22.94394900 | -12.13079000 | 8.58672300 L  |
| C-C_R | 23.56971700 | -11.66590700 | 6.58476600 L  |
| H-H_  | 24.50968100 | -11.16173300 | 4.71655300 L  |
| H-H_  | 32.84676200 | -10.86966500 | 7.32374100 L  |
| N-N_R | 30.49725700 | -11.57855700 | 4.90338300 L  |
| N-N_R | 22.35837100 | -12.06976700 | 5.99904800 L  |
| C-C_R | 21.13827100 | -11.72257800 | 6.60635200 L  |
| C-C_R | 22.36700900 | -12.81763000 | 4.80434200 L  |
| C-C_R | 20.96875000 | -10.45372600 | 7.17097000 L  |
| C-C_R | 20.07832100 | -12.63361600 | 6.65018900 L  |
| C-C_R | 21.42010100 | -12.56958200 | 3.80738500 L  |
| C-C_R | 23.32946300 | -13.81100400 | 4.60379300 L  |
| H-H_  | 21.78240000 | -9.74029900  | 7.12749900 L  |
| C-C_R | 19.76477700 | -10.11082400 | 7.76667500 L  |
| H-H_  | 20.20941000 | -13.62012700 | 6.22236600 L  |
| C-C_R | 18.87789700 | -12.27803200 | 7.24114100 L  |
| H-H_  | 20.68201500 | -11.78921000 | 3.95348600 L  |
| C-C_R | 21.43553200 | -13.30950700 | 2.63556800 L  |
| H-H_  | 24.05994000 | -14.01037400 | 5.37790900 L  |
| C-C_R | 23.34334600 | -14.53592200 | 3.42246800 L  |
| H-H_  | 19.64645900 | -9.11807400  | 8.18701600 L  |
| C-C_R | 18.71060800 | -11.01596800 | 7.80404300 L  |
| H-H_  | 18.06639700 | -12.99691900 | 7.26996400 L  |
| C-C_R | 22.39666600 | -14.29376400 | 2.43395300 L  |
| H-H_  | 20.69885600 | -13.10399900 | 1.86815200 L  |
| H-H_  | 24.09695700 | -15.30202600 | 3.27974500 L  |
| H-H_  | 17.76780800 | -10.74227700 | 8.26030800 L  |
| H-H_  | 22.40991700 | -14.86441200 | 1.51275300 L  |
| C-C_R | 42.59568600 | -14.94401500 | 14.90924800 L |
| H-H_  | 41.89809200 | -15.77451600 | 14.92689800 L |
| C-C_R | 44.42346600 | -13.73202300 | 15.88266900 L |
| H-H_  | 45.15250700 | -13.60013900 | 16.67271000 L |
| C-C_R | 43.53298800 | -14.79807800 | 15.92560500 L |
| H-H_  | 43.56685800 | -15.50789500 | 16.74519900 L |
| C-C_R | 42.55159500 | -14.04452800 | 13.85586200 L |
| C-C_R | 43.43968300 | -12.96691700 | 13.81714400 L |

|       |             |              |               |
|-------|-------------|--------------|---------------|
| H-H_  | 41.82826000 | -14.16842700 | 13.05856300 L |
| N-N_R | 43.39271900 | -12.04320300 | 12.75218900 L |
| C-C_R | 44.37583700 | -12.81596900 | 14.84307000 L |
| C-C_R | 42.15643800 | -11.60575700 | 12.25200100 L |
| C-C_R | 44.59051500 | -11.54036200 | 12.20515700 L |
| H-H_  | 45.06009300 | -11.97635900 | 14.82040700 L |
| C-C_R | 41.98036500 | -11.39813600 | 10.87910400 L |
| C-C_R | 41.07612100 | -11.37420200 | 13.11093900 L |
| C-C_R | 45.68197200 | -12.38824800 | 11.99259400 L |
| C-C_R | 44.70583200 | -10.18863600 | 11.87374800 L |
| H-H_  | 42.79733800 | -11.61005400 | 10.20077200 L |
| C-C_R | 40.77248900 | -10.94240300 | 10.38664500 L |
| H-H_  | 41.19471700 | -11.53585600 | 14.17426600 L |
| C-C_R | 39.86394500 | -10.93959500 | 12.60729000 L |
| C-C_R | 46.86284100 | -11.88615200 | 11.46670200 L |
| H-H_  | 45.59500600 | -13.43877300 | 12.24115200 L |
| H-H_  | 43.86483100 | -9.52600100  | 12.04459900 L |
| C-C_R | 45.88605000 | -9.69748400  | 11.33668400 L |
| C-C_R | 39.69441500 | -10.68925300 | 11.24175500 L |
| H-H_  | 40.65681000 | -10.80742000 | 9.31955600 L  |
| H-H_  | 39.02571900 | -10.77945600 | 13.27340300 L |
| H-H_  | 47.69912000 | -12.55604900 | 11.30619300 L |
| C-C_R | 46.97239000 | -10.54138900 | 11.13260500 L |
| H-H_  | 45.95792800 | -8.64459800  | 11.08946900 L |
| C-C_R | 38.37425700 | -10.25632500 | 10.74766300 L |
| H-H_  | 47.89737400 | -10.15342500 | 10.72126400 L |
| N-N_R | 37.33666000 | -10.75361400 | 11.40182000 L |
| C-C_R | 38.16320200 | -9.39537900  | 9.62200900 L  |
| C-C_R | 36.10904400 | -10.53498600 | 10.92937400 L |
| N-N_R | 36.95820700 | -9.25568700  | 9.10311600 L  |
| C-C_R | 39.21580400 | -8.57930700  | 8.98339800 L  |
| C-C_R | 35.91461900 | -9.84375000  | 9.70878400 L  |
| C-C_R | 34.96564700 | -11.03684700 | 11.62192900 L |
| C-C_R | 40.24764200 | -7.97926400  | 9.71404100 L  |
| C-C_R | 39.14207600 | -8.32204400  | 7.61193700 L  |
| C-C_R | 34.61005200 | -9.72095200  | 9.15460500 L  |
| C-C_R | 33.71014300 | -10.88529600 | 11.07843400 L |
| C-C_R | 35.13804200 | -11.72640000 | 12.85790900 L |
| C-C_R | 41.18470700 | -7.17710700  | 9.09383000 L  |
| H-H_  | 40.30149300 | -8.11988900  | 10.78596700 L |
| H-H_  | 38.32696900 | -8.75333800  | 7.04402300 L  |
| C-C_R | 40.09079000 | -7.53936100  | 6.97960000 L  |
| C-C_R | 33.50001800 | -10.26302300 | 9.82874800 L  |
| C-C_R | 34.47292400 | -8.97819400  | 7.95100800 L  |

|       |              |              |               |
|-------|--------------|--------------|---------------|
| H-H_  | 32.86144100  | -11.29971500 | 11.60620600 L |
| N-N_R | 35.25241700  | -12.29047100 | 13.86185100 L |
| H-H_  | 41.96436600  | -6.70337700  | 9.67738300 L  |
| C-C_R | 41.13233800  | -6.95940000  | 7.71314600 L  |
| H-H_  | 40.03309200  | -7.37408900  | 5.91123400 L  |
| N-N_R | 34.35905400  | -8.36916700  | 6.96977300 L  |
| N-N_R | 42.10275200  | -6.16779800  | 7.07957800 L  |
| C-C_R | 43.45045400  | -6.24776600  | 7.48608600 L  |
| C-C_R | 41.74089500  | -5.30987700  | 6.02091400 L  |
| C-C_R | 44.02644800  | -7.48325100  | 7.78887700 L  |
| C-C_R | 44.22912800  | -5.09149700  | 7.58480900 L  |
| C-C_R | 42.56021100  | -5.19199900  | 4.89490000 L  |
| C-C_R | 40.55866900  | -4.56856800  | 6.08538400 L  |
| H-H_  | 43.42802200  | -8.38251600  | 7.70635600 L  |
| C-C_R | 45.35293600  | -7.55805800  | 8.18700200 L  |
| H-H_  | 43.78394000  | -4.13076400  | 7.35652700 L  |
| C-C_R | 45.55892100  | -5.17601200  | 7.97085800 L  |
| H-H_  | 43.47271500  | -5.77232400  | 4.83760200 L  |
| C-C_R | 42.20267300  | -4.34136200  | 3.85958700 L  |
| H-H_  | 39.92361200  | -4.65306500  | 6.95832200 L  |
| C-C_R | 40.20267000  | -3.73456600  | 5.03629000 L  |
| H-H_  | 45.78337300  | -8.52627000  | 8.41460900 L  |
| C-C_R | 46.12773300  | -6.40608100  | 8.27726600 L  |
| H-H_  | 46.14911200  | -4.27093000  | 8.04297000 L  |
| C-C_R | 41.02181000  | -3.61075000  | 3.92094000 L  |
| H-H_  | 42.84689900  | -4.26114200  | 2.99218400 L  |
| H-H_  | 39.28063300  | -3.16733400  | 5.10034600 L  |
| H-H_  | 47.16736200  | -6.46875700  | 8.57892300 L  |
| H-H_  | 40.74161100  | -2.95309300  | 3.10558600 L  |
| C-C_R | -34.63449400 | -6.62986300  | 7.48715300 L  |
| H-H_  | -33.72511900 | -6.04361300  | 7.53859000 L  |
| C-C_R | -36.63325100 | -7.48461100  | 8.51781000 L  |
| H-H_  | -37.27582100 | -7.58378700  | 9.38426200 L  |
| C-C_R | -35.46327500 | -6.73558500  | 8.59939500 L  |
| H-H_  | -35.19676800 | -6.23928400  | 9.52527000 L  |
| C-C_R | -34.96814000 | -7.25948200  | 6.29971000 L  |
| C-C_R | -36.14279900 | -8.01773100  | 6.21821300 L  |
| H-H_  | -34.33245400 | -7.16411700  | 5.42888900 L  |
| N-N_R | -36.48078100 | -8.66748200  | 5.01968300 L  |
| C-C_R | -36.97444700 | -8.12656700  | 7.34020600 L  |
| C-C_R | -35.47676200 | -9.26072800  | 4.23869200 L  |
| C-C_R | -37.82046800 | -8.73296600  | 4.60221200 L  |
| H-H_  | -37.87323800 | -8.72995700  | 7.28292100 L  |
| C-C_R | -35.52091300 | -9.16585300  | 2.84233000 L  |

|       |              |              |               |
|-------|--------------|--------------|---------------|
| C-C_R | -34.41481500 | -9.94267900  | 4.84757400 L  |
| C-C_R | -38.67146200 | -7.63710300  | 4.78242100 L  |
| C-C_R | -38.31104200 | -9.89805300  | 4.00114300 L  |
| H-H_  | -36.31539100 | -8.59737700  | 2.36989600 L  |
| C-C_R | -34.53978700 | -9.76142900  | 2.07632400 L  |
| H-H_  | -34.37513900 | -10.02019400 | 5.92707400 L  |
| C-C_R | -33.43413400 | -10.52619500 | 4.07175100 L  |
| C-C_R | -39.99270000 | -7.71471100  | 4.37163200 L  |
| H-H_  | -38.28649300 | -6.72833600  | 5.22916400 L  |
| H-H_  | -37.65647800 | -10.74977700 | 3.87538600 L  |
| C-C_R | -39.63279900 | -9.96064600  | 3.59089200 L  |
| C-C_R | -33.49095900 | -10.46989000 | 2.67452400 L  |
| H-H_  | -34.57129500 | -9.65964000  | 0.99825900 L  |
| H-H_  | -32.59962200 | -11.03799900 | 4.53467100 L  |
| H-H_  | -40.64144500 | -6.85684000  | 4.50803500 L  |
| C-C_R | -40.47952500 | -8.87211400  | 3.77534900 L  |
| H-H_  | -40.00277800 | -10.86975700 | 3.13296100 L  |
| C-C_R | -32.39747500 | -11.07593200 | 1.88160300 L  |
| H-H_  | -41.51315200 | -8.92617000  | 3.45664300 L  |
| N-N_R | -31.19874500 | -10.94572000 | 2.43427900 L  |
| C-C_R | -32.55969600 | -11.69193100 | 0.61908100 L  |
| C-C_R | -30.12226500 | -11.31404500 | 1.73020900 L  |
| N-N_R | -31.48720000 | -11.97715600 | -0.12166900 L |
| C-C_R | -33.85193500 | -12.10000100 | 0.03746100 L  |
| C-C_R | -30.28023800 | -11.77008000 | 0.39059300 L  |
| C-C_R | -28.82369700 | -11.20462200 | 2.30324200 L  |
| C-C_R | -34.90455200 | -12.58681800 | 0.81945300 L  |
| C-C_R | -34.01666700 | -12.07643300 | -1.35138800 L |
| C-C_R | -29.10550900 | -12.03414000 | -0.38481900 L |
| C-C_R | -27.68030000 | -11.51678400 | 1.53515300 L  |
| C-C_R | -28.73534100 | -10.70426600 | 3.62874800 L  |
| C-C_R | -36.09271300 | -12.99487900 | 0.24320900 L  |
| H-H_  | -34.78027400 | -12.68079500 | 1.89170300 L  |
| H-H_  | -33.19160800 | -11.73736200 | -1.96616300 L |
| C-C_R | -35.20530100 | -12.47154300 | -1.93635200 L |
| C-C_R | -27.85901700 | -11.89446700 | 0.18963800 L  |
| C-C_R | -29.24091000 | -12.47782900 | -1.72934100 L |
| N-N_R | -28.67248500 | -10.29561700 | 4.71277900 L  |
| H-H_  | -36.89069300 | -13.39344900 | 0.85874200 L  |
| C-C_R | -36.26393200 | -12.92842900 | -1.14421200 L |
| H-H_  | -35.32396800 | -12.42425500 | -3.01242500 L |
| H-H_  | -26.98688700 | -12.13218700 | -0.40523700 L |
| N-N_R | -29.33739100 | -12.84111400 | -2.82559300 L |
| N-N_R | -37.47527200 | -13.33239200 | -1.72893600 L |

|       |              |              |               |
|-------|--------------|--------------|---------------|
| C-C_R | -38.69537800 | -12.98510000 | -1.12262600 L |
| C-C_R | -37.46664000 | -14.08015200 | -2.92463700 L |
| C-C_R | -38.86489900 | -11.71624900 | -0.55800800 L |
| C-C_R | -39.75532800 | -13.89613800 | -1.07879000 L |
| C-C_R | -38.41354800 | -13.83210400 | -3.92159300 L |
| C-C_R | -36.50418600 | -15.07352600 | -3.12518600 L |
| H-H_  | -38.05124900 | -11.00282200 | -0.60147900 L |
| C-C_R | -40.06887200 | -11.37334600 | 0.03769700 L  |
| H-H_  | -39.62423900 | -14.88264900 | -1.50661300 L |
| C-C_R | -40.95675100 | -13.54058900 | -0.48783400 L |
| H-H_  | -39.15163400 | -13.05173200 | -3.77549300 L |
| C-C_R | -38.39811800 | -14.57203000 | -5.09341100 L |
| H-H_  | -35.77370300 | -15.27299900 | -2.35007400 L |
| C-C_R | -36.49030300 | -15.79844500 | -4.30651100 L |
| H-H_  | -40.18719000 | -10.38059700 | 0.45803700 L  |
| C-C_R | -41.12304100 | -12.27849100 | 0.07506500 L  |
| H-H_  | -41.76825100 | -14.25947600 | -0.45901100 L |
| C-C_R | -37.43698300 | -15.55628600 | -5.29502600 L |
| H-H_  | -39.13479300 | -14.36652100 | -5.86082600 L |
| H-H_  | -35.73768500 | -16.56468500 | -4.44823600 L |
| H-H_  | -42.06583500 | -12.00490200 | 0.53232400 L  |
| H-H_  | -37.42373200 | -16.12693400 | -6.21622600 L |
| C-C_R | -17.23796300 | -16.20653800 | 7.18027000 L  |
| H-H_  | -17.93555100 | -17.03714100 | 7.19891400 L  |
| C-C_R | -15.41017700 | -14.99464700 | 8.15468500 L  |
| H-H_  | -14.68113500 | -14.86276300 | 8.94472600 L  |
| C-C_R | -16.30165400 | -16.06073800 | 8.19762400 L  |
| H-H_  | -16.26679100 | -16.77041800 | 9.01622100 L  |
| C-C_R | -17.28205400 | -15.30705000 | 6.12688400 L  |
| C-C_R | -16.39396600 | -14.22944000 | 6.08816500 L  |
| H-H_  | -18.00538200 | -15.43105200 | 5.33057900 L  |
| N-N_R | -16.44093000 | -13.30572600 | 5.02321100 L  |
| C-C_R | -15.45781200 | -14.07849200 | 7.11409100 L  |
| C-C_R | -17.67821000 | -12.86831400 | 4.52302500 L  |
| C-C_R | -15.24313400 | -12.80288500 | 4.47617800 L  |
| H-H_  | -14.77355600 | -13.23888100 | 7.09142900 L  |
| C-C_R | -17.85328400 | -12.66065800 | 3.15012600 L  |
| C-C_R | -18.75752800 | -12.63672500 | 5.38196000 L  |
| C-C_R | -14.15167700 | -13.65077000 | 4.26361600 L  |
| C-C_R | -15.12881000 | -11.45129500 | 4.14576700 L  |
| H-H_  | -17.03631100 | -12.87257600 | 2.47179400 L  |
| C-C_R | -19.06215900 | -12.20496000 | 2.65767000 L  |
| H-H_  | -18.63892600 | -12.79848000 | 6.44628200 L  |
| C-C_R | -19.96969800 | -12.20221900 | 4.87930700 L  |

|       |              |              |               |
|-------|--------------|--------------|---------------|
| C-C_R | -12.97180700 | -13.14870900 | 3.73772700 L  |
| H-H_  | -14.23863700 | -14.70139800 | 4.51316900 L  |
| H-H_  | -15.96881800 | -10.78852300 | 4.31562100 L  |
| C-C_R | -13.94759300 | -10.96010800 | 3.60870000 L  |
| C-C_R | -20.14023400 | -11.95181000 | 3.51277900 L  |
| H-H_  | -19.17683900 | -12.06994200 | 1.59057800 L  |
| H-H_  | -20.80792400 | -12.04208000 | 5.54541900 L  |
| H-H_  | -12.13452900 | -13.81857100 | 3.57721500 L  |
| C-C_R | -12.86125900 | -11.80391100 | 3.40362600 L  |
| H-H_  | -13.87572100 | -9.90712000  | 3.36049000 L  |
| C-C_R | -21.45939200 | -11.51884800 | 3.01868400 L  |
| H-H_  | -11.93727400 | -11.41598200 | 2.99228800 L  |
| N-N_R | -22.49698900 | -12.01613600 | 3.67284100 L  |
| C-C_R | -21.67044700 | -10.65790100 | 1.89303100 L  |
| C-C_R | -23.72460500 | -11.79750800 | 3.20039500 L  |
| N-N_R | -22.87543500 | -10.51831100 | 1.37513200 L  |
| C-C_R | -20.61784500 | -9.84183000  | 1.25441900 L  |
| C-C_R | -23.91903000 | -11.10627200 | 1.97980600 L  |
| C-C_R | -24.86800200 | -12.29936900 | 3.89295100 L  |
| C-C_R | -19.58700000 | -9.24192300  | 1.98606000 L  |
| C-C_R | -20.69157300 | -9.58456600  | -0.11704200 L |
| C-C_R | -25.22359700 | -10.98347400 | 1.42562700 L  |
| C-C_R | -26.12350600 | -12.14781800 | 3.34945600 L  |
| C-C_R | -24.69560700 | -12.98892300 | 5.12893100 L  |
| C-C_R | -18.64894200 | -8.43962900  | 1.36485100 L  |
| H-H_  | -19.53215000 | -9.38251300  | 3.05798300 L  |
| H-H_  | -21.50667400 | -10.01596200 | -0.68396100 L |
| C-C_R | -19.74385900 | -8.80191800  | -0.74937500 L |
| C-C_R | -26.33463000 | -11.52558000 | 2.09977200 L  |
| C-C_R | -25.36072500 | -10.24071700 | 0.22202900 L  |
| H-H_  | -26.97220800 | -12.56223800 | 3.87722700 L  |
| N-N_R | -24.58122600 | -13.55309600 | 6.13386700 L  |
| H-H_  | -17.86928300 | -7.96589900  | 1.94840400 L  |
| C-C_R | -18.70131100 | -8.22192200  | -0.01583200 L |
| H-H_  | -19.80155600 | -8.63664600  | -1.81774100 L |
| N-N_R | -25.47458900 | -9.63179100  | -0.75821100 L |
| N-N_R | -17.73089700 | -7.43032000  | -0.64940000 L |
| C-C_R | -16.38319500 | -7.51028900  | -0.24289300 L |
| C-C_R | -18.09275400 | -6.57239900  | -1.70806500 L |
| C-C_R | -15.80720100 | -8.74577400  | 0.05989900 L  |
| C-C_R | -15.60452100 | -6.35401900  | -0.14416900 L |
| C-C_R | -17.27443700 | -6.45455600  | -2.83407600 L |
| C-C_R | -19.27498000 | -5.83109000  | -1.64359500 L |
| H-H_  | -16.40562700 | -9.64503800  | -0.02262200 L |



|       |              |              |               |
|-------|--------------|--------------|---------------|
| C-C_R | -14.48071300 | -8.82058000  | 0.45802300 L  |
| H-H_  | -16.04970900 | -5.39328600  | -0.37245200 L |
| C-C_R | -14.27472800 | -6.43853400  | 0.24187900 L  |
| H-H_  | -16.36093400 | -7.03484600  | -2.89137600 L |
| C-C_R | -17.63097600 | -5.60388400  | -3.86939100 L |
| H-H_  | -19.91003700 | -5.91558700  | -0.77065700 L |
| C-C_R | -19.63197200 | -4.99722500  | -2.69169100 L |
| H-H_  | -14.05027600 | -9.78879200  | 0.68563100 L  |
| C-C_R | -13.70591600 | -7.66860300  | 0.54828800 L  |
| H-H_  | -13.68453700 | -5.53345200  | 0.31399100 L  |
| C-C_R | -18.81283800 | -4.87330700  | -3.80803600 L |
| H-H_  | -16.98675000 | -5.52366500  | -4.73679500 L |
| H-H_  | -20.55301600 | -4.42985600  | -2.62863300 L |
| H-H_  | -12.66628700 | -7.73127900  | 0.84994500 L  |
| H-H_  | -19.09203200 | -4.21571800  | -4.62239700 L |
| C-C_R | -4.74257100  | -5.59339300  | 7.40496700 L  |
| H-H_  | -3.83319500  | -5.00714300  | 7.45640500 L  |
| C-C_R | -6.74132700  | -6.44814100  | 8.43562500 L  |
| H-H_  | -7.38389800  | -6.54731700  | 9.30207700 L  |
| C-C_R | -5.57135200  | -5.69911500  | 8.51720900 L  |
| H-H_  | -5.30484500  | -5.20281400  | 9.44308500 L  |
| C-C_R | -5.07621700  | -6.22301200  | 6.21752400 L  |
| C-C_R | -6.25087600  | -6.98126100  | 6.13602700 L  |
| H-H_  | -4.44053100  | -6.12764700  | 5.34670300 L  |
| N-N_R | -6.58785800  | -7.63097700  | 4.93749400 L  |
| C-C_R | -7.08252400  | -7.09009600  | 7.25802100 L  |
| C-C_R | -5.58483900  | -8.22425800  | 4.15650700 L  |
| C-C_R | -7.92754500  | -7.69646100  | 4.52002300 L  |
| H-H_  | -7.98131500  | -7.69348600  | 7.20073600 L  |
| C-C_R | -5.62899000  | -8.12938300  | 2.76014400 L  |
| C-C_R | -4.52289200  | -8.90620800  | 4.76538800 L  |
| C-C_R | -8.77953900  | -6.60063300  | 4.70023600 L  |
| C-C_R | -8.41911900  | -8.86158200  | 3.91895700 L  |
| H-H_  | -6.42246800  | -7.56087200  | 2.28770800 L  |
| C-C_R | -4.64786300  | -8.72495900  | 1.99413800 L  |
| H-H_  | -4.48321600  | -8.98372400  | 5.84488900 L  |
| C-C_R | -3.54221100  | -9.48972500  | 3.98956500 L  |
| C-C_R | -10.10077700 | -6.67824000  | 4.28944600 L  |
| H-H_  | -8.39457000  | -5.69186600  | 5.14697900 L  |
| H-H_  | -7.76355500  | -9.71327200  | 3.79319800 L  |
| C-C_R | -9.74087600  | -8.92417500  | 3.50870700 L  |
| C-C_R | -3.59903500  | -9.43342000  | 2.59233900 L  |
| H-H_  | -4.67937200  | -8.62316900  | 0.91607300 L  |
| H-H_  | -2.70769900  | -10.00152900 | 4.45248600 L  |

|       |              |              |               |
|-------|--------------|--------------|---------------|
| H-H_  | -10.74952200 | -5.82037000  | 4.42585000 L  |
| C-C_R | -10.58760200 | -7.83564300  | 3.69316400 L  |
| H-H_  | -10.11085500 | -9.83328700  | 3.05077600 L  |
| C-C_R | -2.50555200  | -10.03946200 | 1.79941700 L  |
| H-H_  | -11.62122900 | -7.88969900  | 3.37445700 L  |
| N-N_R | -1.30682100  | -9.90924900  | 2.35209300 L  |
| C-C_R | -2.66777300  | -10.65546100 | 0.53689500 L  |
| C-C_R | -0.23034200  | -10.27757500 | 1.64802400 L  |
| N-N_R | -1.59427700  | -10.94065100 | -0.20385800 L |
| C-C_R | -3.95901200  | -11.06349600 | -0.04472700 L |
| C-C_R | -0.38831500  | -10.73360900 | 0.30840800 L  |
| C-C_R | 1.06822600   | -10.16815200 | 2.22105700 L  |
| C-C_R | -5.01262900  | -11.55034800 | 0.73726700 L  |
| C-C_R | -4.12474400  | -11.03996300 | -1.43357300 L |
| C-C_R | 0.78641500   | -10.99767000 | -0.46700400 L |
| C-C_R | 2.21162400   | -10.48031300 | 1.45296700 L  |
| C-C_R | 1.15758200   | -9.66776100  | 3.54655900 L  |
| C-C_R | -6.19979100  | -11.95837400 | 0.16102100 L  |
| H-H_  | -4.88835100  | -11.64432500 | 1.80951700 L  |
| H-H_  | -3.29968400  | -10.70089200 | -2.04834900 L |
| C-C_R | -5.31237800  | -11.43503800 | -2.01854000 L |
| C-C_R | 2.03290600   | -10.85799700 | 0.10745300 L  |
| C-C_R | 0.65101300   | -11.44135900 | -1.81152700 L |
| N-N_R | 1.21943800   | -9.25914600  | 4.63059400 L  |
| H-H_  | -6.99777000  | -12.35694400 | 0.77655300 L  |
| C-C_R | -6.37200900  | -11.89195900 | -1.22639800 L |
| H-H_  | -5.43204500  | -11.38778500 | -3.09461100 L |
| H-H_  | 2.90503700   | -11.09571600 | -0.48742200 L |
| N-N_R | 0.55553100   | -11.80460800 | -2.90778100 L |
| N-N_R | -7.58334900  | -12.29592100 | -1.81112200 L |
| C-C_R | -8.80345500  | -11.94863000 | -1.20481200 L |
| C-C_R | -7.57471700  | -13.04368200 | -3.00682200 L |
| C-C_R | -8.97297500  | -10.67977800 | -0.64019400 L |
| C-C_R | -9.86340500  | -12.85966800 | -1.16097500 L |
| C-C_R | -8.52162400  | -12.79563400 | -4.00377900 L |
| C-C_R | -6.61226300  | -14.03705600 | -3.20737100 L |
| H-H_  | -8.15932600  | -9.96635100  | -0.68366500 L |
| C-C_R | -10.17694900 | -10.33687600 | -0.04448900 L |
| H-H_  | -9.73231600  | -13.84617900 | -1.58879800 L |
| C-C_R | -11.06482800 | -12.50411900 | -0.57002000 L |
| H-H_  | -9.25971100  | -12.01526200 | -3.85767800 L |
| C-C_R | -8.50619400  | -13.53555900 | -5.17559600 L |
| H-H_  | -5.88177900  | -14.23652800 | -2.43226000 L |
| C-C_R | -6.59838000  | -14.76197400 | -4.38869600 L |

|       |              |              |               |
|-------|--------------|--------------|---------------|
| H-H_  | -10.29526700 | -9.34412600  | 0.37585200 L  |
| C-C_R | -11.23111700 | -11.24202000 | -0.00712100 L |
| H-H_  | -11.87632800 | -13.22300600 | -0.54119700 L |
| C-C_R | -7.54506000  | -14.51981600 | -5.37721100 L |
| H-H_  | -9.24287000  | -13.33005100 | -5.94301200 L |
| H-H_  | -5.84476300  | -15.52818000 | -4.53042500 L |
| H-H_  | -12.17391100 | -10.96843100 | 0.45013900 L  |
| H-H_  | -7.53180900  | -15.09046400 | -6.29841100 L |
| C-C_R | 12.65396000  | -15.17006700 | 7.09808400 L  |
| H-H_  | 11.95637300  | -16.00067000 | 7.11672900 L  |
| C-C_R | 14.48174700  | -13.95817700 | 8.07250000 L  |
| H-H_  | 15.21078800  | -13.82629300 | 8.86254100 L  |
| C-C_R | 13.59026900  | -15.02426700 | 8.11543800 L  |
| H-H_  | 13.62513200  | -15.73394700 | 8.93403500 L  |
| C-C_R | 12.60986900  | -14.27058000 | 6.04469800 L  |
| C-C_R | 13.49795700  | -13.19296900 | 6.00598000 L  |
| H-H_  | 11.88654100  | -14.39458100 | 5.24839400 L  |
| N-N_R | 13.45099300  | -12.26925500 | 4.94102500 L  |
| C-C_R | 14.43411100  | -13.04202100 | 7.03190600 L  |
| C-C_R | 12.21371300  | -11.83184400 | 4.44083900 L  |
| C-C_R | 14.64878900  | -11.76641400 | 4.39399300 L  |
| H-H_  | 15.11836700  | -12.20241100 | 7.00924300 L  |
| C-C_R | 12.03863900  | -11.62418800 | 3.06794000 L  |
| C-C_R | 11.13439600  | -11.60025400 | 5.29977500 L  |
| C-C_R | 15.74024600  | -12.61430000 | 4.18143000 L  |
| C-C_R | 14.76311300  | -10.41482500 | 4.06358100 L  |
| H-H_  | 12.85561200  | -11.83610600 | 2.38960800 L  |
| C-C_R | 10.82976400  | -11.16848900 | 2.57548400 L  |
| H-H_  | 11.25299700  | -11.76201000 | 6.36409600 L  |
| C-C_R | 9.92222500   | -11.16574900 | 4.79712100 L  |
| C-C_R | 16.92111600  | -12.11220400 | 3.65553800 L  |
| H-H_  | 15.65328700  | -13.66492700 | 4.43098300 L  |
| H-H_  | 13.92310500  | -9.75205300  | 4.23343500 L  |
| C-C_R | 15.94433000  | -9.92363800  | 3.52651500 L  |
| C-C_R | 9.75169000   | -10.91534000 | 3.43059400 L  |
| H-H_  | 10.71508400  | -11.03347200 | 1.50839200 L  |
| H-H_  | 9.08399900   | -11.00561000 | 5.46323400 L  |
| H-H_  | 17.75739400  | -12.78210100 | 3.49502900 L  |
| C-C_R | 17.03066400  | -10.76744100 | 3.32144100 L  |
| H-H_  | 16.01620300  | -8.87065000  | 3.27830500 L  |
| C-C_R | 8.43253100   | -10.48237700 | 2.93649900 L  |
| H-H_  | 17.95564800  | -10.37947700 | 2.91010000 L  |
| N-N_R | 7.39493400   | -10.97966600 | 3.59065600 L  |
| C-C_R | 8.22147600   | -9.62143100  | 1.81084500 L  |

|       |             |              |               |
|-------|-------------|--------------|---------------|
| C-C_R | 6.16731800  | -10.76103800 | 3.11821000 L  |
| N-N_R | 7.01648800  | -9.48184100  | 1.29294600 L  |
| C-C_R | 9.27407800  | -8.80535900  | 1.17223400 L  |
| C-C_R | 5.97289300  | -10.06980200 | 1.89762100 L  |
| C-C_R | 5.02392100  | -11.26289900 | 3.81076500 L  |
| C-C_R | 10.30592300 | -8.20541800  | 1.90387100 L  |
| C-C_R | 9.20035100  | -8.54809600  | -0.19922700 L |
| C-C_R | 4.66832700  | -9.94700400  | 1.34344100 L  |
| C-C_R | 3.76841700  | -11.11134800 | 3.26727000 L  |
| C-C_R | 5.19631600  | -11.95245200 | 5.04674500 L  |
| C-C_R | 11.24298100 | -7.40315900  | 1.28266600 L  |
| H-H_  | 10.35977400 | -8.34604300  | 2.97579800 L  |
| H-H_  | 8.38524900  | -8.97949200  | -0.76614600 L |
| C-C_R | 10.14906400 | -7.76541300  | -0.83156400 L |
| C-C_R | 3.55729300  | -10.48910900 | 2.01758700 L  |
| C-C_R | 4.53119800  | -9.20424600  | 0.13984400 L  |
| H-H_  | 2.91971500  | -11.52576700 | 3.79504200 L  |
| N-N_R | 5.31069700  | -12.51662500 | 6.05168200 L  |
| H-H_  | 12.02264000 | -6.92942900  | 1.86621900 L  |
| C-C_R | 11.19061200 | -7.18545200  | -0.09801800 L |
| H-H_  | 10.09036700 | -7.60017500  | -1.89992700 L |
| N-N_R | 4.41733400  | -8.59532100  | -0.84039600 L |
| N-N_R | 12.16102600 | -6.39384900  | -0.73158600 L |
| C-C_R | 13.50872900 | -6.47381800  | -0.32507800 L |
| C-C_R | 11.79916900 | -5.53592900  | -1.79025000 L |
| C-C_R | 14.08472200 | -7.70930300  | -0.02228700 L |
| C-C_R | 14.28740200 | -5.31754900  | -0.22635500 L |
| C-C_R | 12.61748600 | -5.41808500  | -2.91626100 L |
| C-C_R | 10.61694300 | -4.79462000  | -1.72578000 L |
| H-H_  | 13.48629600 | -8.60856800  | -0.10480800 L |
| C-C_R | 15.41121000 | -7.78411000  | 0.37583800 L  |
| H-H_  | 13.84221400 | -4.35681600  | -0.45463700 L |
| C-C_R | 15.61719600 | -5.40206400  | 0.15969400 L  |
| H-H_  | 13.53098900 | -5.99837600  | -2.97356200 L |
| C-C_R | 12.26094700 | -4.56741400  | -3.95157700 L |
| H-H_  | 9.98188600  | -4.87911700  | -0.85284200 L |
| C-C_R | 10.25995100 | -3.96075400  | -2.77387700 L |
| H-H_  | 15.84164700 | -8.75232200  | 0.60344500 L  |
| C-C_R | 16.18600700 | -6.63213200  | 0.46610200 L  |
| H-H_  | 16.20738700 | -4.49698200  | 0.23180600 L  |
| C-C_R | 11.08008400 | -3.83680200  | -3.89022400 L |
| H-H_  | 12.90517300 | -4.48719400  | -4.81898000 L |
| H-H_  | 9.33890700  | -3.39338600  | -2.71081800 L |
| H-H_  | 17.22563600 | -6.69480900  | 0.76775900 L  |

|       |             |              |               |
|-------|-------------|--------------|---------------|
| H-H_  | 10.79989100 | -3.17924700  | -4.70458300 L |
| C-C_R | 25.14935200 | -4.55692300  | 7.32278200 L  |
| H-H_  | 26.05872800 | -3.97067200  | 7.37421900 L  |
| C-C_R | 23.15059600 | -5.41167000  | 8.35343900 L  |
| H-H_  | 22.50802500 | -5.51084600  | 9.21989100 L  |
| C-C_R | 24.32057100 | -4.66264500  | 8.43502400 L  |
| H-H_  | 24.58707800 | -4.16634400  | 9.36089900 L  |
| C-C_R | 24.81570600 | -5.18654200  | 6.13533900 L  |
| C-C_R | 23.64104800 | -5.94479000  | 6.05384200 L  |
| H-H_  | 25.45139300 | -5.09117600  | 5.26451800 L  |
| N-N_R | 23.30406500 | -6.59450600  | 4.85530900 L  |
| C-C_R | 22.80940000 | -6.05362600  | 7.17583500 L  |
| C-C_R | 24.30808400 | -7.18775300  | 4.07431800 L  |
| C-C_R | 21.96437800 | -6.65999000  | 4.43783800 L  |
| H-H_  | 21.91160800 | -6.65698100  | 7.11854700 L  |
| C-C_R | 24.26293300 | -7.09291300  | 2.67795900 L  |
| C-C_R | 25.36903100 | -7.86973800  | 4.68320300 L  |
| C-C_R | 21.11238400 | -5.56416200  | 4.61805000 L  |
| C-C_R | 21.47280400 | -7.82511200  | 3.83677200 L  |
| H-H_  | 23.46945500 | -6.52440100  | 2.20552200 L  |
| C-C_R | 25.24406000 | -7.68848800  | 1.91195300 L  |
| H-H_  | 25.40870700 | -7.94725300  | 5.76270300 L  |
| C-C_R | 26.35071200 | -8.45322000  | 3.90737700 L  |
| C-C_R | 19.79114600 | -5.64177000  | 4.20726000 L  |
| H-H_  | 21.49735300 | -4.65539600  | 5.06479300 L  |
| H-H_  | 22.12836800 | -8.67680200  | 3.71101200 L  |
| C-C_R | 20.15204600 | -7.88767000  | 3.42651900 L  |
| C-C_R | 26.29288800 | -8.39694900  | 2.51015300 L  |
| H-H_  | 25.21255100 | -7.58669900  | 0.83388800 L  |
| H-H_  | 27.18422400 | -8.96505900  | 4.37030000 L  |
| H-H_  | 19.14240100 | -4.78389900  | 4.34366400 L  |
| C-C_R | 19.30432100 | -6.79917300  | 3.61097800 L  |
| H-H_  | 19.78106900 | -8.79681600  | 2.96859000 L  |
| C-C_R | 27.38637100 | -9.00299100  | 1.71723200 L  |
| H-H_  | 18.27069400 | -6.85322900  | 3.29227200 L  |
| N-N_R | 28.58510200 | -8.87277900  | 2.26990800 L  |
| C-C_R | 27.22415000 | -9.61899000  | 0.45471000 L  |
| C-C_R | 29.66258100 | -9.24106900  | 1.56583500 L  |
| N-N_R | 28.29764600 | -9.90418000  | -0.28604300 L |
| C-C_R | 25.93291100 | -10.02702500 | -0.12691300 L |
| C-C_R | 29.50360800 | -9.69713900  | 0.22622200 L  |
| C-C_R | 30.96014900 | -9.13168200  | 2.13887100 L  |
| C-C_R | 24.87929400 | -10.51387700 | 0.65508200 L  |
| C-C_R | 25.76717900 | -10.00349200 | -1.51575900 L |

|       |             |              |               |
|-------|-------------|--------------|---------------|
| C-C_R | 30.67833800 | -9.96119900  | -0.54919000 L |
| C-C_R | 32.10354700 | -9.44384300  | 1.37078200 L  |
| C-C_R | 31.04950500 | -8.63129100  | 3.46437400 L  |
| C-C_R | 23.69213200 | -10.92190400 | 0.07883500 L  |
| H-H_  | 25.00357200 | -10.60785500 | 1.72733200 L  |
| H-H_  | 26.59223900 | -9.66442100  | -2.13053400 L |
| C-C_R | 24.57954500 | -10.39856800 | -2.10072500 L |
| C-C_R | 31.92483000 | -9.82152600  | 0.02526700 L  |
| C-C_R | 30.54293700 | -10.40488800 | -1.89371200 L |
| N-N_R | 31.11136200 | -8.22267600  | 4.54840800 L  |
| H-H_  | 22.89415300 | -11.32047300 | 0.69436800 L  |
| C-C_R | 23.51991500 | -10.85548800 | -1.30858300 L |
| H-H_  | 24.45987800 | -10.35131400 | -3.17679600 L |
| H-H_  | 32.79696000 | -10.05924600 | -0.56960800 L |
| N-N_R | 30.44745400 | -10.76813800 | -2.98996700 L |
| N-N_R | 22.30857400 | -11.25945100 | -1.89330700 L |
| C-C_R | 21.08846800 | -10.91215900 | -1.28699700 L |
| C-C_R | 22.31720600 | -12.00721200 | -3.08900800 L |
| C-C_R | 20.91894800 | -9.64330800  | -0.72237900 L |
| C-C_R | 20.02851800 | -11.82319700 | -1.24316100 L |
| C-C_R | 21.37029900 | -11.75916300 | -4.08596400 L |
| C-C_R | 23.27966000 | -13.00058500 | -3.28955700 L |
| H-H_  | 21.73259800 | -8.92988100  | -0.76585000 L |
| C-C_R | 19.71497400 | -9.30040500  | -0.12667400 L |
| H-H_  | 20.15960700 | -12.80970800 | -1.67098400 L |
| C-C_R | 18.82809500 | -11.46761400 | -0.65220800 L |
| H-H_  | 20.63221200 | -10.97879100 | -3.93986400 L |
| C-C_R | 21.38572900 | -12.49908900 | -5.25778200 L |
| H-H_  | 24.01014400 | -13.20005800 | -2.51444500 L |
| C-C_R | 23.29354300 | -13.72550400 | -4.47088200 L |
| H-H_  | 19.59665600 | -8.30765600  | 0.29366600 L  |
| C-C_R | 18.66080600 | -10.20555000 | -0.08930600 L |
| H-H_  | 18.01659500 | -12.18650100 | -0.62338500 L |
| C-C_R | 22.34686300 | -13.48334600 | -5.45939700 L |
| H-H_  | 20.64905400 | -12.29358000 | -6.02519700 L |
| H-H_  | 24.04716000 | -14.49170900 | -4.61261000 L |
| H-H_  | 17.71801200 | -9.93196100  | 0.36795300 L  |
| H-H_  | 22.36011500 | -14.05399300 | -6.38059700 L |
| C-C_R | 42.54588300 | -14.13359700 | 7.01589900 L  |
| H-H_  | 41.84829600 | -14.96420000 | 7.03454300 L  |
| C-C_R | 44.37367000 | -12.92170600 | 7.99031400 L  |
| H-H_  | 45.10271100 | -12.78982200 | 8.78035500 L  |
| C-C_R | 43.48319200 | -13.98776200 | 8.03325000 L  |
| H-H_  | 43.51705500 | -14.69747700 | 8.85185000 L  |

|       |             |              |               |
|-------|-------------|--------------|---------------|
| C-C_R | 42.50179200 | -13.23410900 | 5.96251300 L  |
| C-C_R | 43.38988000 | -12.15649900 | 5.92379400 L  |
| H-H_  | 41.77846400 | -13.35811100 | 5.16620800 L  |
| N-N_R | 43.34291600 | -11.23278500 | 4.85884000 L  |
| C-C_R | 44.32603400 | -12.00555100 | 6.94972000 L  |
| C-C_R | 42.10663600 | -10.79533900 | 4.35865100 L  |
| C-C_R | 44.54071200 | -10.72994400 | 4.31180700 L  |
| H-H_  | 45.01029000 | -11.16594000 | 6.92705800 L  |
| C-C_R | 41.93056200 | -10.58771700 | 2.98575500 L  |
| C-C_R | 41.02631900 | -10.56378400 | 5.21758900 L  |
| C-C_R | 45.63216900 | -11.57782900 | 4.09924500 L  |
| C-C_R | 44.65603600 | -9.37831900  | 3.98139300 L  |
| H-H_  | 42.74753600 | -10.79963500 | 2.30742300 L  |
| C-C_R | 40.72268700 | -10.13198400 | 2.49329600 L  |
| H-H_  | 41.14492000 | -10.72553900 | 6.28191100 L  |
| C-C_R | 39.81414800 | -10.12927900 | 4.71493600 L  |
| C-C_R | 46.81303900 | -11.07573400 | 3.57335300 L  |
| H-H_  | 45.54521000 | -12.62845700 | 4.34879700 L  |
| H-H_  | 43.81502900 | -8.71558300  | 4.15125000 L  |
| C-C_R | 45.83625400 | -8.88716700  | 3.44432900 L  |
| C-C_R | 39.64461200 | -9.87883500  | 3.34840500 L  |
| H-H_  | 40.60700700 | -9.99700200  | 1.42620700 L  |
| H-H_  | 38.97592300 | -9.96913900  | 5.38104800 L  |
| H-H_  | 47.64931700 | -11.74563000 | 3.41284400 L  |
| C-C_R | 46.92258700 | -9.73097000  | 3.23925500 L  |
| H-H_  | 45.90812600 | -7.83417900  | 3.19611900 L  |
| C-C_R | 38.32445500 | -9.44590700  | 2.85431300 L  |
| H-H_  | 47.84757200 | -9.34300700  | 2.82791400 L  |
| N-N_R | 37.28685700 | -9.94319600  | 3.50847000 L  |
| C-C_R | 38.11340000 | -8.58496000  | 1.72866000 L  |
| C-C_R | 36.05924100 | -9.72456800  | 3.03602400 L  |
| N-N_R | 36.90841100 | -8.44537000  | 1.21076100 L  |
| C-C_R | 39.16600200 | -7.76888900  | 1.09004800 L  |
| C-C_R | 35.86481600 | -9.03333200  | 1.81543500 L  |
| C-C_R | 34.91584400 | -10.22642800 | 3.72858000 L  |
| C-C_R | 40.19784600 | -7.16894800  | 1.82168600 L  |
| C-C_R | 39.09227400 | -7.51162500  | -0.28141300 L |
| C-C_R | 34.56025000 | -8.91053300  | 1.26125600 L  |
| C-C_R | 33.66034000 | -10.07487700 | 3.18508500 L  |
| C-C_R | 35.08824000 | -10.91598200 | 4.96456000 L  |
| C-C_R | 41.13490500 | -6.36668800  | 1.20048000 L  |
| H-H_  | 40.25169700 | -7.30957200  | 2.89361200 L  |
| H-H_  | 38.27717300 | -7.94302100  | -0.84833200 L |
| C-C_R | 40.04098700 | -6.72894300  | -0.91374900 L |

|       |              |              |               |
|-------|--------------|--------------|---------------|
| C-C_R | 33.45021600  | -9.45260400  | 1.93539800 L  |
| C-C_R | 34.42312100  | -8.16777600  | 0.05765800 L  |
| H-H_  | 32.81163800  | -10.48929700 | 3.71285600 L  |
| N-N_R | 35.20262000  | -11.48015500 | 5.96949600 L  |
| H-H_  | 41.91456300  | -5.89295800  | 1.78403300 L  |
| C-C_R | 41.08253500  | -6.14898200  | -0.18020300 L |
| H-H_  | 39.98329000  | -6.56367000  | -1.98211500 L |
| N-N_R | 34.30925800  | -7.55885000  | -0.92258200 L |
| N-N_R | 42.05294900  | -5.35737900  | -0.81377100 L |
| C-C_R | 43.40065200  | -5.43734800  | -0.40726400 L |
| C-C_R | 41.69109200  | -4.49945800  | -1.87243600 L |
| C-C_R | 43.97664500  | -6.67283300  | -0.10447200 L |
| C-C_R | 44.17932600  | -4.28107800  | -0.30854000 L |
| C-C_R | 42.51040800  | -4.38158000  | -2.99844900 L |
| C-C_R | 40.50886600  | -3.75815000  | -1.80796600 L |
| H-H_  | 43.37821900  | -7.57209800  | -0.18699300 L |
| C-C_R | 45.30313300  | -6.74763900  | 0.29365200 L  |
| H-H_  | 43.73413700  | -3.32034500  | -0.53682300 L |
| C-C_R | 45.50911900  | -4.36559300  | 0.07750800 L  |
| H-H_  | 43.42291200  | -4.96190600  | -3.05574700 L |
| C-C_R | 42.15287000  | -3.53094300  | -4.03376200 L |
| H-H_  | 39.87380900  | -3.84264600  | -0.93502800 L |
| C-C_R | 40.15287400  | -2.92424900  | -2.85606500 L |
| H-H_  | 45.73357000  | -7.71585100  | 0.52126000 L  |
| C-C_R | 46.07793000  | -5.59566200  | 0.38391700 L  |
| H-H_  | 46.09931000  | -3.46051100  | 0.14962000 L  |
| C-C_R | 40.97200700  | -2.80033100  | -3.97241000 L |
| H-H_  | 42.79709700  | -3.45072400  | -4.90116600 L |
| H-H_  | 39.23083000  | -2.35691600  | -2.79300400 L |
| H-H_  | 47.11755900  | -5.65833800  | 0.68557400 L  |
| H-H_  | 40.69181400  | -2.14277700  | -4.78676800 L |
| C-C_R | -34.68429700 | -5.81944500  | -0.40619700 L |
| H-H_  | -33.77492100 | -5.23319500  | -0.35475900 L |
| C-C_R | -36.68305300 | -6.67419300  | 0.62446100 L  |
| H-H_  | -37.32562400 | -6.77336900  | 1.49091300 L  |
| C-C_R | -35.51307800 | -5.92516700  | 0.70604500 L  |
| H-H_  | -35.24657100 | -5.42886600  | 1.63192100 L  |
| C-C_R | -35.01794300 | -6.44906400  | -1.59364000 L |
| C-C_R | -36.19260100 | -7.20731300  | -1.67513700 L |
| H-H_  | -34.38225600 | -6.35369900  | -2.46446100 L |
| N-N_R | -36.53058300 | -7.85706300  | -2.87366700 L |
| C-C_R | -37.02424900 | -7.31614800  | -0.55314300 L |
| C-C_R | -35.52656400 | -8.45031000  | -3.65465700 L |
| C-C_R | -37.87027100 | -7.92254700  | -3.29113800 L |



|       |              |              |                |
|-------|--------------|--------------|----------------|
| H-H_  | -37.92304100 | -7.91953800  | -0.61042800 L  |
| C-C_R | -35.57071600 | -8.35543500  | -5.05102000 L  |
| C-C_R | -34.46461800 | -9.13226000  | -3.04577600 L  |
| C-C_R | -38.72126500 | -6.82668400  | -3.11092800 L  |
| C-C_R | -38.36084500 | -9.08763400  | -3.89220700 L  |
| H-H_  | -36.36518700 | -7.78706000  | -5.52245900 L  |
| C-C_R | -34.58958900 | -8.95101000  | -5.81702600 L  |
| H-H_  | -34.42494200 | -9.20977600  | -1.96627500 L  |
| C-C_R | -33.48393600 | -9.71577700  | -3.82159900 L  |
| C-C_R | -40.04250300 | -6.90429200  | -3.52171800 L  |
| H-H_  | -38.33629000 | -5.91802000  | -2.66319000 L  |
| H-H_  | -37.70628000 | -9.93935900  | -4.01796400 L  |
| C-C_R | -39.68260200 | -9.15022700  | -4.30245700 L  |
| C-C_R | -33.54076100 | -9.65947200  | -5.21882500 L  |
| H-H_  | -34.62109800 | -8.84922100  | -6.89509100 L  |
| H-H_  | -32.64941800 | -10.22768300 | -3.35768300 L  |
| H-H_  | -40.69124800 | -6.04642100  | -3.38531400 L  |
| C-C_R | -40.52932800 | -8.06169500  | -4.11800000 L  |
| H-H_  | -40.05258100 | -10.05933900 | -4.76038800 L  |
| C-C_R | -32.44727200 | -10.26561600 | -6.01075200 L  |
| H-H_  | -41.56295500 | -8.11575100  | -4.43670700 L  |
| N-N_R | -31.24854700 | -10.13530100 | -5.45907100 L  |
| C-C_R | -32.60949300 | -10.88161500 | -7.27327400 L  |
| C-C_R | -30.17206800 | -10.50362600 | -6.16314000 L  |
| N-N_R | -31.53699600 | -11.16683900 | -8.01402400 L  |
| C-C_R | -33.90173700 | -11.28958200 | -7.85588800 L  |
| C-C_R | -30.33003500 | -10.95976300 | -7.50176200 L  |
| C-C_R | -28.87349400 | -10.39430600 | -5.58911200 L  |
| C-C_R | -34.95435500 | -11.77640000 | -7.07389700 L  |
| C-C_R | -34.06647000 | -11.26601500 | -9.24473700 L  |
| C-C_R | -29.15531100 | -11.22372200 | -8.27816800 L  |
| C-C_R | -27.73010200 | -10.70636500 | -6.35819700 L  |
| C-C_R | -28.78514300 | -9.89384800  | -4.26460200 L  |
| C-C_R | -36.14251600 | -12.18446100 | -7.65014000 L  |
| H-H_  | -34.83007100 | -11.87047900 | -6.00065200 L  |
| H-H_  | -33.24141000 | -10.92694400 | -9.85951300 L  |
| C-C_R | -35.25509700 | -11.66122700 | -9.82870600 L  |
| C-C_R | -27.90881900 | -11.08404900 | -7.70371100 L  |
| C-C_R | -29.29070600 | -11.66751300 | -9.62169600 L  |
| N-N_R | -28.72228800 | -9.48519800  | -3.18057000 L  |
| H-H_  | -36.94049500 | -12.58303000 | -7.03460800 L  |
| C-C_R | -36.31373400 | -12.11801100 | -9.03756200 L  |
| H-H_  | -35.37376500 | -11.61393900 | -10.90478000 L |
| H-H_  | -27.03668900 | -11.32176800 | -8.29858600 L  |

|       |              |              |                |
|-------|--------------|--------------|----------------|
| N-N_R | -29.38719400 | -12.03069500 | -10.71894300 L |
| N-N_R | -37.52507500 | -12.52197300 | -9.62228600 L  |
| C-C_R | -38.74517400 | -12.17478400 | -9.01498100 L  |
| C-C_R | -37.51644300 | -13.26973400 | -10.81798600 L |
| C-C_R | -38.91470100 | -10.90583000 | -8.45135800 L  |
| C-C_R | -39.80512400 | -13.08582200 | -8.97114500 L  |
| C-C_R | -38.46335000 | -13.02168600 | -11.81494300 L |
| C-C_R | -36.55398900 | -14.26310800 | -11.01853500 L |
| H-H_  | -38.10105100 | -10.19240300 | -8.49482900 L  |
| C-C_R | -40.11867500 | -10.56292800 | -7.85565300 L  |
| H-H_  | -39.67404200 | -14.07223100 | -9.39996200 L  |
| C-C_R | -41.00654800 | -12.73027300 | -8.38018900 L  |
| H-H_  | -39.20143700 | -12.24131400 | -11.66884200 L |
| C-C_R | -38.44792000 | -13.76161100 | -12.98676000 L |
| H-H_  | -35.82350500 | -14.46258000 | -10.24342400 L |
| C-C_R | -36.54010600 | -14.98802600 | -12.19986000 L |
| H-H_  | -40.23699300 | -9.57017800  | -7.43531200 L  |
| C-C_R | -41.17284300 | -11.46807200 | -7.81828500 L  |
| H-H_  | -41.81805400 | -13.44905800 | -8.35236100 L  |
| C-C_R | -37.48678600 | -14.74586800 | -13.18837500 L |
| H-H_  | -39.18459500 | -13.55610200 | -13.75417600 L |
| H-H_  | -35.78748800 | -15.75426600 | -12.34158600 L |
| H-H_  | -42.11563700 | -11.19448300 | -7.36102500 L  |
| H-H_  | -37.47353400 | -15.31651600 | -14.10957500 L |
| C-C_R | -17.28775900 | -15.39622100 | -0.71208500 L  |
| H-H_  | -17.98535300 | -16.22672200 | -0.69443500 L  |
| C-C_R | -15.45997900 | -14.18422800 | 0.26133600 L   |
| H-H_  | -14.73093800 | -14.05234500 | 1.05137700 L   |
| C-C_R | -16.35145700 | -15.25031900 | 0.30427400 L   |
| H-H_  | -16.31659400 | -15.95999900 | 1.12287100 L   |
| C-C_R | -17.33185000 | -14.49673400 | -1.76547100 L  |
| C-C_R | -16.44376900 | -13.41902100 | -1.80518400 L  |
| H-H_  | -18.05518500 | -14.62063300 | -2.56277000 L  |
| N-N_R | -16.49073300 | -12.49530700 | -2.87013900 L  |
| C-C_R | -15.50760900 | -13.26817500 | -0.77826300 L  |
| C-C_R | -17.72801300 | -12.05789600 | -3.37032500 L  |
| C-C_R | -15.29293700 | -11.99246600 | -3.41717100 L  |
| H-H_  | -14.82335200 | -12.42856500 | -0.80092600 L  |
| C-C_R | -17.90308000 | -11.85034200 | -4.74222900 L  |
| C-C_R | -18.80733000 | -11.82630600 | -2.51138900 L  |
| C-C_R | -14.20148000 | -12.84035200 | -3.62973400 L  |
| C-C_R | -15.17861200 | -10.64087600 | -3.74758200 L  |
| H-H_  | -17.08611300 | -12.06215800 | -5.42155600 L  |
| C-C_R | -19.11195600 | -11.39464300 | -5.23468500 L  |

|       |              |              |                |
|-------|--------------|--------------|----------------|
| H-H_  | -18.68872900 | -11.98806200 | -1.44706800 L  |
| C-C_R | -20.01950100 | -11.39180100 | -3.01404300 L  |
| C-C_R | -13.02161000 | -12.33829100 | -4.15562300 L  |
| H-H_  | -14.28843900 | -13.89097900 | -3.38018100 L  |
| H-H_  | -16.01861400 | -9.97820700  | -3.57673400 L  |
| C-C_R | -13.99739500 | -10.14969000 | -4.28464900 L  |
| C-C_R | -20.19003600 | -11.14139200 | -4.38057000 L  |
| H-H_  | -19.22664200 | -11.25952400 | -6.30277200 L  |
| H-H_  | -20.85772600 | -11.23166100 | -2.34793000 L  |
| H-H_  | -12.18433200 | -13.00815300 | -4.31613500 L  |
| C-C_R | -12.91105600 | -10.99359500 | -4.48872900 L  |
| H-H_  | -13.92552300 | -9.09670100  | -4.53285900 L  |
| C-C_R | -21.50918800 | -10.70853100 | -4.87367000 L  |
| H-H_  | -11.98707700 | -10.60556300 | -4.90106200 L  |
| N-N_R | -22.54678500 | -11.20582000 | -4.21951400 L  |
| C-C_R | -21.72024900 | -9.84748200  | -6.00031900 L  |
| C-C_R | -23.77440800 | -10.98709000 | -4.69295400 L  |
| N-N_R | -22.92523800 | -9.70789300  | -6.51821800 L  |
| C-C_R | -20.66764100 | -9.03151300  | -6.63793500 L  |
| C-C_R | -23.96883300 | -10.29585400 | -5.91354300 L  |
| C-C_R | -24.91779900 | -11.48905300 | -3.99940400 L  |
| C-C_R | -19.63680200 | -8.43150500  | -5.90729000 L  |
| C-C_R | -20.74137500 | -8.77414800  | -8.01039100 L  |
| C-C_R | -25.27339300 | -10.17315800 | -6.46672800 L  |
| C-C_R | -26.17330900 | -11.33740000 | -4.54389400 L  |
| C-C_R | -24.74540900 | -12.17850400 | -2.76441900 L  |
| C-C_R | -18.69874400 | -7.62921000  | -6.52849800 L  |
| H-H_  | -19.58195200 | -8.57209400  | -4.83536600 L  |
| H-H_  | -21.55647700 | -9.20554300  | -8.57731000 L  |
| C-C_R | -19.79366100 | -7.99150000  | -8.64272500 L  |
| C-C_R | -26.38443300 | -10.71516100 | -5.79357700 L  |
| C-C_R | -25.41052800 | -9.43029800  | -7.67132000 L  |
| H-H_  | -27.02201100 | -11.75181900 | -4.01612200 L  |
| N-N_R | -24.63102900 | -12.74267700 | -1.75948200 L  |
| H-H_  | -17.91908000 | -7.15558300  | -5.94395100 L  |
| C-C_R | -18.75111400 | -7.41150400  | -7.90918200 L  |
| H-H_  | -19.85135900 | -7.82622700  | -9.71109100 L  |
| N-N_R | -25.52439100 | -8.82137300  | -8.65156000 L  |
| N-N_R | -17.78069300 | -6.62000300  | -8.54175500 L  |
| C-C_R | -16.43299100 | -6.69997200  | -8.13524700 L  |
| C-C_R | -18.14255700 | -5.76198100  | -9.60141400 L  |
| C-C_R | -15.85699700 | -7.93545700  | -7.83245600 L  |
| C-C_R | -15.65432300 | -5.54360100  | -8.03751900 L  |
| C-C_R | -17.32424000 | -5.64413700  | -10.72742500 L |

|       |              |             |                |
|-------|--------------|-------------|----------------|
| C-C_R | -19.32478300 | -5.02067200 | -9.53694400 L  |
| H-H_  | -16.45543000 | -8.83462000 | -7.91597200 L  |
| C-C_R | -14.53051600 | -8.01016100 | -7.43532600 L  |
| H-H_  | -16.09951200 | -4.58286700 | -8.26580100 L  |
| C-C_R | -14.32453000 | -5.62811500 | -7.65147000 L  |
| H-H_  | -16.41073700 | -6.22442800 | -10.78472600 L |
| C-C_R | -17.68077900 | -4.79346500 | -11.76274100 L |
| H-H_  | -19.95983400 | -5.10527100 | -8.66301200 L  |
| C-C_R | -19.68177400 | -4.18680600 | -10.58504100 L |
| H-H_  | -14.10007900 | -8.97837400 | -7.20771900 L  |
| C-C_R | -13.75571900 | -6.85818400 | -7.34506200 L  |
| H-H_  | -13.73433300 | -4.72313600 | -7.57836300 L  |
| C-C_R | -18.86264100 | -4.06288800 | -11.70138600 L |
| H-H_  | -17.03655200 | -4.71324600 | -12.63014400 L |
| H-H_  | -20.60281900 | -3.61943800 | -10.52198200 L |
| H-H_  | -12.71609000 | -6.92086000 | -7.04340400 L  |
| H-H_  | -19.14183500 | -3.40529900 | -12.51574700 L |
| C-C_R | -4.79237300  | -4.78297400 | -0.48838200 L  |
| H-H_  | -3.88299800  | -4.19672400 | -0.43694500 L  |
| C-C_R | -6.79113000  | -5.63772200 | 0.54227500 L   |
| H-H_  | -7.43370100  | -5.73689800 | 1.40872700 L   |
| C-C_R | -5.62115500  | -4.88869600 | 0.62386000 L   |
| H-H_  | -5.35464800  | -4.39239500 | 1.54973500 L   |
| C-C_R | -5.12602000  | -5.41259300 | -1.67582500 L  |
| C-C_R | -6.30067800  | -6.17084200 | -1.75732200 L  |
| H-H_  | -4.49033300  | -5.31722800 | -2.54664600 L  |
| N-N_R | -6.63766000  | -6.82055800 | -2.95585500 L  |
| C-C_R | -7.13232600  | -6.27967800 | -0.63532900 L  |
| C-C_R | -5.63464100  | -7.41383900 | -3.73684300 L  |
| C-C_R | -7.97734800  | -6.88604200 | -3.37332600 L  |
| H-H_  | -8.03111800  | -6.88306800 | -0.69261400 L  |
| C-C_R | -5.67879200  | -7.31896400 | -5.13320500 L  |
| C-C_R | -4.57269500  | -8.09579000 | -3.12796100 L  |
| C-C_R | -8.82934100  | -5.79021400 | -3.19311400 L  |
| C-C_R | -8.46892200  | -8.05116400 | -3.97439200 L  |
| H-H_  | -6.47226500  | -6.75055500 | -5.60464700 L  |
| C-C_R | -4.69766600  | -7.91454000 | -5.89921100 L  |
| H-H_  | -4.53301800  | -8.17330500 | -2.04846100 L  |
| C-C_R | -3.59201300  | -8.67930600 | -3.90378400 L  |
| C-C_R | -10.15057900 | -5.86782200 | -3.60390400 L  |
| H-H_  | -8.44436600  | -4.88155000 | -2.74537600 L  |
| H-H_  | -7.81335700  | -8.90285400 | -4.10015200 L  |
| C-C_R | -9.79067900  | -8.11375700 | -4.38464300 L  |
| C-C_R | -3.64883800  | -8.62300100 | -5.30101100 L  |

|       |              |              |                |
|-------|--------------|--------------|----------------|
| H-H_  | -4.72917400  | -7.81275100  | -6.97727600 L  |
| H-H_  | -2.75749500  | -9.19121300  | -3.43986900 L  |
| H-H_  | -10.79932400 | -5.00995100  | -3.46750000 L  |
| C-C_R | -10.63740500 | -7.02522500  | -4.20018600 L  |
| H-H_  | -10.16065700 | -9.02286800  | -4.84257400 L  |
| C-C_R | -2.55534800  | -9.22914500  | -6.09293800 L  |
| H-H_  | -11.67103200 | -7.07928100  | -4.51889200 L  |
| N-N_R | -1.35662400  | -9.09883100  | -5.54125600 L  |
| C-C_R | -2.71756900  | -9.84514400  | -7.35546000 L  |
| C-C_R | -0.28014400  | -9.46715600  | -6.24532600 L  |
| N-N_R | -1.64407300  | -10.13033400 | -8.09621300 L  |
| C-C_R | -4.00881500  | -10.25307700 | -7.93807700 L  |
| C-C_R | -0.43811100  | -9.92329300  | -7.58394700 L  |
| C-C_R | 1.01843000   | -9.35783600  | -5.67129800 L  |
| C-C_R | -5.06243200  | -10.73992900 | -7.15608200 L  |
| C-C_R | -4.17454600  | -10.22954400 | -9.32692300 L  |
| C-C_R | 0.73661200   | -10.18725100 | -8.36035400 L  |
| C-C_R | 2.16182100   | -9.66989500  | -6.44038200 L  |
| C-C_R | 1.10777900   | -8.85734300  | -4.34679000 L  |
| C-C_R | -6.24959300  | -11.14795600 | -7.73232900 L  |
| H-H_  | -4.93814700  | -10.83400900 | -6.08283800 L  |
| H-H_  | -3.34948700  | -9.89047300  | -9.94169800 L  |
| C-C_R | -5.36217500  | -10.62472100 | -9.91089500 L  |
| C-C_R | 1.98310400   | -10.04757800 | -7.78589700 L  |
| C-C_R | 0.60121700   | -10.63104200 | -9.70388200 L  |
| N-N_R | 1.16963600   | -8.44872800  | -3.26275600 L  |
| H-H_  | -7.04757300  | -11.54652500 | -7.11679600 L  |
| C-C_R | -6.42181100  | -11.08154000 | -9.11974700 L  |
| H-H_  | -5.48184100  | -10.57746800 | -10.98696600 L |
| H-H_  | 2.85523400   | -10.28529800 | -8.38077200 L  |
| N-N_R | 0.50572900   | -10.99419000 | -10.80113100 L |
| N-N_R | -7.63315100  | -11.48550300 | -9.70447100 L  |
| C-C_R | -8.85325100  | -11.13831300 | -9.09716600 L  |
| C-C_R | -7.62452000  | -12.23326300 | -10.90017200 L |
| C-C_R | -9.02277800  | -9.86936000  | -8.53354300 L  |
| C-C_R | -9.91320100  | -12.04935100 | -9.05333000 L  |
| C-C_R | -8.57142700  | -11.98521500 | -11.89712800 L |
| C-C_R | -6.66206600  | -13.22663700 | -11.10072100 L |
| H-H_  | -8.20912800  | -9.15593300  | -8.57701400 L  |
| C-C_R | -10.22675100 | -9.52645700  | -7.93783800 L  |
| H-H_  | -9.78211800  | -13.03576000 | -9.48214800 L  |
| C-C_R | -11.11462400 | -11.69380200 | -8.46237500 L  |
| H-H_  | -9.30951400  | -11.20484300 | -11.75102800 L |
| C-C_R | -8.55599700  | -12.72514100 | -13.06894600 L |

|       |              |              |                |
|-------|--------------|--------------|----------------|
| H-H_  | -5.93158200  | -13.42611000 | -10.32560900 L |
| C-C_R | -6.64818300  | -13.95155600 | -12.28204600 L |
| H-H_  | -10.34507000 | -8.53370800  | -7.51749800 L  |
| C-C_R | -11.28092000 | -10.43160200 | -7.90047000 L  |
| H-H_  | -11.92613000 | -12.41258700 | -8.43454600 L  |
| C-C_R | -7.59486300  | -13.70939700 | -13.27056100 L |
| H-H_  | -9.29267200  | -12.51963200 | -13.83636100 L |
| H-H_  | -5.89456500  | -14.71776100 | -12.42377400 L |
| H-H_  | -12.22371400 | -10.15801300 | -7.44321100 L  |
| H-H_  | -7.58161100  | -14.28004500 | -14.19176100 L |
| C-C_R | 12.60416400  | -14.35975100 | -0.79427100 L  |
| H-H_  | 11.90657000  | -15.19025200 | -0.77662100 L  |
| C-C_R | 14.43194400  | -13.14775800 | 0.17915000 L   |
| H-H_  | 15.16098500  | -13.01587400 | 0.96919100 L   |
| C-C_R | 13.54046600  | -14.21384900 | 0.22208900 L   |
| H-H_  | 13.57532900  | -14.92352900 | 1.04068600 L   |
| C-C_R | 12.56007300  | -13.46026300 | -1.84765700 L  |
| C-C_R | 13.44815400  | -12.38255100 | -1.88737000 L  |
| H-H_  | 11.83673800  | -13.58416300 | -2.64495600 L  |
| N-N_R | 13.40119000  | -11.45883700 | -2.95232400 L  |
| C-C_R | 14.38431500  | -12.23170500 | -0.86044900 L  |
| C-C_R | 12.16391100  | -11.02142500 | -3.45251000 L  |
| C-C_R | 14.59898600  | -10.95599600 | -3.49935700 L  |
| H-H_  | 15.06857100  | -11.39209400 | -0.88311100 L  |
| C-C_R | 11.98884300  | -10.81387100 | -4.82441500 L  |
| C-C_R | 11.08459300  | -10.78983600 | -2.59357500 L  |
| C-C_R | 15.69044400  | -11.80388100 | -3.71191900 L  |
| C-C_R | 14.71331100  | -9.60440600  | -3.82976800 L  |
| H-H_  | 12.80581000  | -11.02568700 | -5.50374100 L  |
| C-C_R | 10.77996800  | -10.35817300 | -5.31687100 L  |
| H-H_  | 11.20319500  | -10.95159100 | -1.52925300 L  |
| C-C_R | 9.87242200   | -10.35533000 | -3.09622800 L  |
| C-C_R | 16.87131300  | -11.30178600 | -4.23781100 L  |
| H-H_  | 15.60348400  | -12.85450900 | -3.46236700 L  |
| H-H_  | 13.87330900  | -8.94173700  | -3.65891900 L  |
| C-C_R | 15.89452800  | -9.11321900  | -4.36683500 L  |
| C-C_R | 9.70188700   | -10.10492100 | -4.46275600 L  |
| H-H_  | 10.66528100  | -10.22305300 | -6.38495700 L  |
| H-H_  | 9.03419700   | -10.19519100 | -2.43011600 L  |
| H-H_  | 17.70759100  | -11.97168200 | -4.39832000 L  |
| C-C_R | 16.98086800  | -9.95712400  | -4.57091400 L  |
| H-H_  | 15.96640000  | -8.06023100  | -4.61504500 L  |
| C-C_R | 8.38273500   | -9.67206100  | -4.95585600 L  |
| H-H_  | 17.90584600  | -9.56905800  | -4.98325000 L  |

|       |             |              |                |
|-------|-------------|--------------|----------------|
| N-N_R | 7.34513800  | -10.16935000 | -4.30169900 L  |
| C-C_R | 8.17167400  | -8.81101200  | -6.08250400 L  |
| C-C_R | 6.11751500  | -9.95061900  | -4.77514000 L  |
| N-N_R | 6.96668500  | -8.67142200  | -6.60040300 L  |
| C-C_R | 9.22428200  | -7.99504300  | -6.72012100 L  |
| C-C_R | 5.92309100  | -9.25938300  | -5.99572900 L  |
| C-C_R | 4.97412500  | -10.45258200 | -4.08159000 L  |
| C-C_R | 10.25612000 | -7.39500000  | -5.98947800 L  |
| C-C_R | 9.15054800  | -7.73767700  | -8.09257700 L  |
| C-C_R | 4.61853000  | -9.13668700  | -6.54891400 L  |
| C-C_R | 3.71861400  | -10.30092900 | -4.62607900 L  |
| C-C_R | 5.14651400  | -11.14203400 | -2.84660400 L  |
| C-C_R | 11.19317900 | -6.59274000  | -6.61068400 L  |
| H-H_  | 10.30997100 | -7.53562400  | -4.91755200 L  |
| H-H_  | 8.33544700  | -8.16907300  | -8.65949600 L  |
| C-C_R | 10.09926200 | -6.95499400  | -8.72491300 L  |
| C-C_R | 3.50749100  | -9.67869100  | -5.87576300 L  |
| C-C_R | 4.48139500  | -8.39382800  | -7.75350600 L  |
| H-H_  | 2.86991300  | -10.71534900 | -4.09830800 L  |
| N-N_R | 5.26089500  | -11.70620700 | -1.84166800 L  |
| H-H_  | 11.97284400 | -6.11911200  | -6.02613600 L  |
| C-C_R | 11.14080900 | -6.37503300  | -7.99136700 L  |
| H-H_  | 10.04056400 | -6.78975700  | -9.79327600 L  |
| N-N_R | 4.36753200  | -7.78490200  | -8.73374600 L  |
| N-N_R | 12.11123000 | -5.58353300  | -8.62394100 L  |
| C-C_R | 13.45893200 | -5.66350200  | -8.21743300 L  |
| C-C_R | 11.74936600 | -4.72551000  | -9.68360000 L  |
| C-C_R | 14.03492600 | -6.89898700  | -7.91464100 L  |
| C-C_R | 14.23760000 | -4.50713000  | -8.11970400 L  |
| C-C_R | 12.56768300 | -4.60766700  | -10.80961100 L |
| C-C_R | 10.56714000 | -3.98420200  | -9.61913000 L  |
| H-H_  | 13.43649300 | -7.79814900  | -7.99815700 L  |
| C-C_R | 15.36140700 | -6.97369100  | -7.51751200 L  |
| H-H_  | 13.79241100 | -3.54639700  | -8.34798700 L  |
| C-C_R | 15.56739300 | -4.59164500  | -7.73365600 L  |
| H-H_  | 13.48118700 | -5.18795700  | -10.86691100 L |
| C-C_R | 12.21114500 | -3.75699500  | -11.84492600 L |
| H-H_  | 9.93209000  | -4.06880000  | -8.74519700 L  |
| C-C_R | 10.21014900 | -3.15033600  | -10.66722600 L |
| H-H_  | 15.79184400 | -7.94190300  | -7.28990400 L  |
| C-C_R | 16.13620400 | -5.82171400  | -7.42724700 L  |
| H-H_  | 16.15759000 | -3.68666500  | -7.66054900 L  |
| C-C_R | 11.03028200 | -3.02638300  | -11.78357400 L |
| H-H_  | 12.85537100 | -3.67677600  | -12.71233000 L |

|       |             |             |                |
|-------|-------------|-------------|----------------|
| H-H_  | 9.28910400  | -2.58296700 | -10.60416800 L |
| H-H_  | 17.17583300 | -5.88439000 | -7.12559000 L  |
| H-H_  | 10.75008800 | -2.36882900 | -12.59793200 L |
| C-C_R | 25.09955000 | -3.74650400 | -0.57056800 L  |
| H-H_  | 26.00892500 | -3.16025400 | -0.51913000 L  |
| C-C_R | 23.10079300 | -4.60125200 | 0.46009000 L   |
| H-H_  | 22.45822300 | -4.70042800 | 1.32654200 L   |
| C-C_R | 24.27076900 | -3.85222600 | 0.54167400 L   |
| H-H_  | 24.53727500 | -3.35592500 | 1.46755000 L   |
| C-C_R | 24.76590300 | -4.37612300 | -1.75801100 L  |
| C-C_R | 23.59124500 | -5.13437200 | -1.83950800 L  |
| H-H_  | 25.40159000 | -4.28075800 | -2.62883200 L  |
| N-N_R | 23.25426300 | -5.78408800 | -3.03804100 L  |
| C-C_R | 22.75959700 | -5.24320700 | -0.71751400 L  |
| C-C_R | 24.25828100 | -6.37733400 | -3.81903100 L  |
| C-C_R | 21.91457500 | -5.84957200 | -3.45551200 L  |
| H-H_  | 21.86180500 | -5.84656300 | -0.77480200 L  |
| C-C_R | 24.21313100 | -6.28249400 | -5.21539100 L  |
| C-C_R | 25.31922800 | -7.05931900 | -3.21014700 L  |
| C-C_R | 21.06258200 | -4.75374400 | -3.27529900 L  |
| C-C_R | 21.42300100 | -7.01469300 | -4.05657800 L  |
| H-H_  | 23.41965900 | -5.71408500 | -5.68683300 L  |
| C-C_R | 25.19425700 | -6.87807000 | -5.98139700 L  |
| H-H_  | 25.35890500 | -7.13683500 | -2.13064600 L  |
| C-C_R | 26.30090900 | -7.64280100 | -3.98597200 L  |
| C-C_R | 19.74134400 | -4.83135100 | -3.68608900 L  |
| H-H_  | 21.44755700 | -3.84507900 | -2.82756100 L  |
| H-H_  | 22.07856600 | -7.86638300 | -4.18233700 L  |
| C-C_R | 20.10224400 | -7.07725100 | -4.46683100 L  |
| C-C_R | 26.24308500 | -7.58653100 | -5.38319600 L  |
| H-H_  | 25.16274900 | -6.77628000 | -7.05946200 L  |
| H-H_  | 27.13442800 | -8.15474200 | -3.52205400 L  |
| H-H_  | 19.09259900 | -3.97348100 | -3.54968500 L  |
| C-C_R | 19.25451900 | -5.98875400 | -4.28237200 L  |
| H-H_  | 19.73126600 | -7.98639800 | -4.92475900 L  |
| C-C_R | 27.33657500 | -8.19267500 | -6.17512300 L  |
| H-H_  | 18.22089100 | -6.04281000 | -4.60107800 L  |
| N-N_R | 28.53529900 | -8.06236000 | -5.62344200 L  |
| C-C_R | 27.17435400 | -8.80867400 | -7.43764500 L  |
| C-C_R | 29.61277800 | -8.43065100 | -6.32751400 L  |
| N-N_R | 28.24785000 | -9.09386400 | -8.17839800 L  |
| C-C_R | 25.88310900 | -9.21660700 | -8.02026200 L  |
| C-C_R | 29.45381200 | -8.88682200 | -7.66613300 L  |
| C-C_R | 30.91035300 | -8.32136500 | -5.75348400 L  |



|       |             |              |                |
|-------|-------------|--------------|----------------|
| C-C_R | 24.82949100 | -9.70345900  | -7.23826800 L  |
| C-C_R | 25.71737700 | -9.19307400  | -9.40910800 L  |
| C-C_R | 30.62853500 | -9.15078100  | -8.44253900 L  |
| C-C_R | 32.05374400 | -8.63342400  | -6.52256800 L  |
| C-C_R | 30.99970300 | -7.82087200  | -4.42897600 L  |
| C-C_R | 23.64233000 | -10.11148500 | -7.81451400 L  |
| H-H_  | 24.95377600 | -9.79753800  | -6.16502300 L  |
| H-H_  | 26.54243600 | -8.85400300  | -10.02388400 L |
| C-C_R | 24.52974800 | -9.58825100  | -9.99308000 L  |
| C-C_R | 31.87502700 | -9.01110800  | -7.86808200 L  |
| C-C_R | 30.49314000 | -9.59457200  | -9.78606700 L  |
| N-N_R | 31.06155900 | -7.41225700  | -3.34494100 L  |
| H-H_  | 22.84435100 | -10.51005500 | -7.19898200 L  |
| C-C_R | 23.47011200 | -10.04507000 | -9.20193300 L  |
| H-H_  | 24.41008200 | -9.54099800  | -11.06915100 L |
| H-H_  | 32.74715700 | -9.24882700  | -8.46295800 L  |
| N-N_R | 30.39765200 | -9.95772000  | -10.88331600 L |
| N-N_R | 22.25877200 | -10.44903200 | -9.78665700 L  |
| C-C_R | 21.03867200 | -10.10184300 | -9.17935200 L  |
| C-C_R | 22.26740400 | -11.19679300 | -10.98235700 L |
| C-C_R | 20.86914500 | -8.83288900  | -8.61572900 L  |
| C-C_R | 19.97872200 | -11.01288100 | -9.13551600 L  |
| C-C_R | 21.32049600 | -10.94874500 | -11.97931400 L |
| C-C_R | 23.22985800 | -12.19016700 | -11.18290600 L |
| H-H_  | 21.68279500 | -8.11946200  | -8.65920000 L  |
| C-C_R | 19.66517200 | -8.48998700  | -8.02002400 L  |
| H-H_  | 20.10980500 | -11.99929000 | -9.56433300 L  |
| C-C_R | 18.77829800 | -10.65729700 | -8.54456300 L  |
| H-H_  | 20.58241000 | -10.16837300 | -11.83321300 L |
| C-C_R | 21.33592600 | -11.68867000 | -13.15113100 L |
| H-H_  | 23.96034100 | -12.38963900 | -10.40779500 L |
| C-C_R | 23.24374100 | -12.91508500 | -12.36423100 L |
| H-H_  | 19.54685400 | -7.49723700  | -7.59968300 L  |
| C-C_R | 18.61100300 | -9.39513100  | -7.98265600 L  |
| H-H_  | 17.96679200 | -11.37608200 | -8.51673500 L  |
| C-C_R | 22.29706100 | -12.67292700 | -13.35274600 L |
| H-H_  | 20.59925100 | -11.48316200 | -13.91854700 L |
| H-H_  | 23.99735800 | -13.68129100 | -12.50596000 L |
| H-H_  | 17.66820900 | -9.12154200  | -7.52539600 L  |
| H-H_  | 22.31031200 | -13.24357500 | -14.27394600 L |
| C-C_R | 42.49608700 | -13.32328000 | -0.87645600 L  |
| H-H_  | 41.79849300 | -14.15378100 | -0.85880600 L  |
| C-C_R | 44.32386700 | -12.11128800 | 0.09696500 L   |
| H-H_  | 45.05290900 | -11.97940400 | 0.88700600 L   |

|       |             |              |               |
|-------|-------------|--------------|---------------|
| C-C_R | 43.43338900 | -13.17734300 | 0.13990100 L  |
| H-H_  | 43.46725300 | -13.88705800 | 0.95850000 L  |
| C-C_R | 42.45199600 | -12.42379300 | -1.92984200 L |
| C-C_R | 43.34007800 | -11.34608000 | -1.96955500 L |
| H-H_  | 41.72866200 | -12.54769200 | -2.72714100 L |
| N-N_R | 43.29311400 | -10.42236600 | -3.03451000 L |
| C-C_R | 44.27623800 | -11.19523400 | -0.94263400 L |
| C-C_R | 42.05683300 | -9.98492000  | -3.53469800 L |
| C-C_R | 44.49090900 | -9.91952500  | -3.58154200 L |
| H-H_  | 44.96049400 | -10.35562400 | -0.96529700 L |
| C-C_R | 41.88076600 | -9.77740100  | -4.90660000 L |
| C-C_R | 40.97651600 | -9.75336500  | -2.67576000 L |
| C-C_R | 45.58236700 | -10.76741100 | -3.79410500 L |
| C-C_R | 44.60623300 | -8.56790100  | -3.91195600 L |
| H-H_  | 42.69773300 | -9.98921700  | -5.58592700 L |
| C-C_R | 40.67289000 | -9.32166800  | -5.39905900 L |
| H-H_  | 41.09511800 | -9.91512100  | -1.61143900 L |
| C-C_R | 39.76434600 | -9.31886000  | -3.17841400 L |
| C-C_R | 46.76323600 | -10.26531500 | -4.31999700 L |
| H-H_  | 45.49540700 | -11.81803800 | -3.54455200 L |
| H-H_  | 43.76523200 | -7.90526600  | -3.74110500 L |
| C-C_R | 45.78645100 | -8.07674900  | -4.44902000 L |
| C-C_R | 39.59481000 | -9.06841600  | -4.54494400 L |
| H-H_  | 40.55720400 | -9.18658300  | -6.46714300 L |
| H-H_  | 38.92612000 | -9.15872100  | -2.51230100 L |
| H-H_  | 47.59951500 | -10.93521200 | -4.48050600 L |
| C-C_R | 46.87279100 | -8.92065400  | -4.65310000 L |
| H-H_  | 45.85832300 | -7.02376100  | -4.69723000 L |
| C-C_R | 38.27465800 | -8.63559000  | -5.03804100 L |
| H-H_  | 47.79776900 | -8.53258800  | -5.06543500 L |
| N-N_R | 37.23706100 | -9.13287900  | -4.38388500 L |
| C-C_R | 38.06359700 | -7.77454200  | -6.16469000 L |
| C-C_R | 36.00943900 | -8.91414900  | -4.85732500 L |
| N-N_R | 36.85860800 | -7.63495200  | -6.68258900 L |
| C-C_R | 39.11620500 | -6.95857300  | -6.80230600 L |
| C-C_R | 35.81501400 | -8.22291300  | -6.07791500 L |
| C-C_R | 34.86604800 | -9.41611200  | -4.16377500 L |
| C-C_R | 40.14804300 | -6.35852900  | -6.07166400 L |
| C-C_R | 39.04247100 | -6.70120700  | -8.17476200 L |
| C-C_R | 34.51045400 | -8.10021700  | -6.63109900 L |
| C-C_R | 33.61053800 | -9.26445900  | -4.70826500 L |
| C-C_R | 35.03843700 | -10.10556300 | -2.92879000 L |
| C-C_R | 41.08510200 | -5.55627000  | -6.69286900 L |
| H-H_  | 40.20189400 | -6.49915400  | -4.99973700 L |

|       |              |              |                |
|-------|--------------|--------------|----------------|
| H-H_  | 38.22737000  | -7.13260300  | -8.74168100 L  |
| C-C_R | 39.99118500  | -5.91852400  | -8.80709900 L  |
| C-C_R | 33.40041300  | -8.64218600  | -5.95795100 L  |
| C-C_R | 34.37331900  | -7.35735700  | -7.83569100 L  |
| H-H_  | 32.76183600  | -9.67887800  | -4.18049300 L  |
| N-N_R | 35.15281800  | -10.66973600 | -1.92385300 L  |
| H-H_  | 41.86476700  | -5.08264200  | -6.10832200 L  |
| C-C_R | 41.03273200  | -5.33856300  | -8.07355300 L  |
| H-H_  | 39.93348700  | -5.75325200  | -9.87546500 L  |
| N-N_R | 34.25945500  | -6.74843200  | -8.81593100 L  |
| N-N_R | 42.00315300  | -4.54706300  | -8.70612600 L  |
| C-C_R | 43.35085600  | -4.62703100  | -8.29961800 L  |
| C-C_R | 41.64129000  | -3.68904000  | -9.76578500 L  |
| C-C_R | 43.92684900  | -5.86251600  | -7.99682700 L  |
| C-C_R | 44.12952300  | -3.47066000  | -8.20189000 L  |
| C-C_R | 42.46060600  | -3.57116200  | -10.89179900 L |
| C-C_R | 40.45906400  | -2.94773100  | -9.70131500 L  |
| H-H_  | 43.32841600  | -6.76167900  | -8.08034300 L  |
| C-C_R | 45.25333100  | -5.93722100  | -7.59969700 L  |
| H-H_  | 43.68433400  | -2.50992700  | -8.43017200 L  |
| C-C_R | 45.45931600  | -3.55517500  | -7.81584100 L  |
| H-H_  | 43.37311000  | -4.15148700  | -10.94909700 L |
| C-C_R | 42.10306800  | -2.72052500  | -11.92711200 L |
| H-H_  | 39.82401300  | -3.03233000  | -8.82738300 L  |
| C-C_R | 40.10307100  | -2.11383100  | -10.74941500 L |
| H-H_  | 45.68376800  | -6.90543300  | -7.37209000 L  |
| C-C_R | 46.02812700  | -4.78524300  | -7.50943300 L  |
| H-H_  | 46.04951400  | -2.65019500  | -7.74273400 L  |
| C-C_R | 40.92220500  | -1.98991300  | -11.86575900 L |
| H-H_  | 42.74729400  | -2.64030500  | -12.79451500 L |
| H-H_  | 39.18102800  | -1.54649700  | -10.68635400 L |
| H-H_  | 47.06775700  | -4.84792000  | -7.20777600 L  |
| H-H_  | 40.64201200  | -1.33235800  | -12.68011800 L |
| C-C_R | -25.09072900 | -5.55931400  | 11.52478400 L  |
| H-H_  | -26.00013600 | -6.14505400  | 11.46837300 L  |
| C-C_R | -23.07816500 | -4.92925700  | 12.68257900 L  |
| H-H_  | -22.42369900 | -5.00734800  | 13.54301200 L  |
| C-C_R | -24.24799000 | -5.68073400  | 12.62486800 L  |
| H-H_  | -24.50354400 | -6.35525600  | 13.43483300 L  |
| C-C_R | -24.77112300 | -4.70122600  | 10.48696900 L  |
| C-C_R | -23.59660300 | -3.94073000  | 10.54658100 L  |
| H-H_  | -25.41776200 | -4.61837000  | 9.62194900 L   |
| N-N_R | -23.27278700 | -3.06046700  | 9.49995800 L   |
| C-C_R | -22.75087700 | -4.06097700  | 11.65581400 L  |

|       |              |             |               |
|-------|--------------|-------------|---------------|
| C-C_R | -24.28571800 | -2.32219300 | 8.86840200 L  |
| C-C_R | -21.93833400 | -2.90980500 | 9.08780700 L  |
| H-H_  | -21.85209200 | -3.45748500 | 11.71210500 L |
| C-C_R | -24.25912800 | -2.13130200 | 7.48145100 L  |
| C-C_R | -25.33910300 | -1.77955100 | 9.61636100 L  |
| C-C_R | -21.08656200 | -4.01833200 | 9.03094600 L  |
| C-C_R | -21.45380400 | -1.64636500 | 8.73093100 L  |
| H-H_  | -23.47133400 | -2.59100800 | 6.89447500 L  |
| C-C_R | -25.24897800 | -1.39376300 | 6.86475400 L  |
| H-H_  | -25.36519800 | -1.92304900 | 10.68950200 L |
| C-C_R | -26.32864700 | -1.05182400 | 8.98759600 L  |
| C-C_R | -19.77045100 | -3.85728300 | 8.62902500 L  |
| H-H_  | -21.46708000 | -4.99951000 | 9.28948200 L  |
| H-H_  | -22.10880100 | -0.78759300 | 8.78805000 L  |
| C-C_R | -20.13719900 | -1.49992100 | 8.32449000 L  |
| C-C_R | -26.28934600 | -0.82297600 | 7.60747700 L  |
| H-H_  | -25.23105800 | -1.27443600 | 5.78918300 L  |
| H-H_  | -27.15565100 | -0.64589600 | 9.55622900 L  |
| H-H_  | -19.12116000 | -4.72403900 | 8.57916400 L  |
| C-C_R | -19.28963300 | -2.60213900 | 8.27333000 L  |
| H-H_  | -19.77080300 | -0.51621900 | 8.05625000 L  |
| C-C_R | -27.39186100 | -0.06996600 | 6.96895200 L  |
| H-H_  | -18.25999700 | -2.48312700 | 7.95937500 L  |
| N-N_R | -28.58376900 | -0.31119600 | 7.49757000 L  |
| C-C_R | -27.24462800 | 0.78992500  | 5.85600900 L  |
| C-C_R | -29.66848300 | 0.19112700  | 6.89652700 L  |
| N-N_R | -28.32592400 | 1.21833900  | 5.20211800 L  |
| C-C_R | -25.95923700 | 1.30942100  | 5.35235500 L  |
| C-C_R | -29.52665900 | 0.90994800  | 5.67664800 L  |
| C-C_R | -30.95992700 | -0.03421600 | 7.45253600 L  |
| C-C_R | -24.89531400 | 1.62857200  | 6.20374200 L  |
| C-C_R | -25.81189000 | 1.56875900  | 3.98574300 L  |
| C-C_R | -30.71064600 | 1.32465300  | 4.98480300 L  |
| C-C_R | -32.11243200 | 0.42613900  | 6.77724200 L  |
| C-C_R | -31.03237400 | -0.79347700 | 8.64872400 L  |
| C-C_R | -23.71491800 | 2.14669700  | 5.70764600 L  |
| H-H_  | -25.00706600 | 1.50242000  | 7.27518300 L  |
| H-H_  | -26.64499600 | 1.36062100  | 3.32524800 L  |
| C-C_R | -24.63014100 | 2.07590800  | 3.47946500 L  |
| C-C_R | -31.95004600 | 1.06957100  | 5.53441400 L  |
| C-C_R | -30.59146900 | 2.03235400  | 3.75789300 L  |
| N-N_R | -31.08221200 | -1.41394800 | 9.62780600 L  |
| H-H_  | -22.90880500 | 2.41290300  | 6.38131100 L  |
| C-C_R | -23.56111700 | 2.36366300  | 4.33463300 L  |

|       |              |             |               |
|-------|--------------|-------------|---------------|
| H-H_  | -24.52498000 | 2.24840800  | 2.41483500 L  |
| H-H_  | -32.82923000 | 1.42208700  | 5.01118900 L  |
| N-N_R | -30.50821800 | 2.61093300  | 2.75721000 L  |
| N-N_R | -22.35666100 | 2.87966500  | 3.82811600 L  |
| C-C_R | -21.12952000 | 2.41788300  | 4.33692200 L  |
| C-C_R | -22.37926400 | 3.85477200  | 2.80950100 L  |
| C-C_R | -20.95459500 | 1.06109600  | 4.62878400 L  |
| C-C_R | -20.06793800 | 3.30236700  | 4.55172000 L  |
| C-C_R | -21.44519800 | 3.81568600  | 1.77119600 L  |
| C-C_R | -23.34287300 | 4.86693800  | 2.82701500 L  |
| H-H_  | -21.76963800 | 0.37034200  | 4.45142000 L  |
| C-C_R | -19.74371800 | 0.60584800  | 5.12730600 L  |
| H-H_  | -20.20309400 | 4.35505900  | 4.33494500 L  |
| C-C_R | -18.85968600 | 2.83569800  | 5.04305400 L  |
| H-H_  | -20.70634000 | 3.02275100  | 1.74745000 L  |
| C-C_R | -21.47431100 | 4.77825900  | 0.77445700 L  |
| H-H_  | -24.06336500 | 4.90381600  | 3.63554700 L  |
| C-C_R | -23.37057700 | 5.81675100  | 1.81789900 L  |
| H-H_  | -19.62143300 | -0.45144900 | 5.33564800 L  |
| C-C_R | -18.68799900 | 1.48576600  | 5.33564100 L  |
| H-H_  | -18.04697500 | 3.53487300  | 5.20621800 L  |
| C-C_R | -22.43662500 | 5.78171700  | 0.78905800 L  |
| H-H_  | -20.74753900 | 4.73391500  | -0.02784500 L |
| H-H_  | -24.12392300 | 6.59483900  | 1.84423300 L  |
| H-H_  | -17.73892700 | 1.12631800  | 5.71496400 L  |
| H-H_  | -22.46064000 | 6.52752100  | 0.00426000 L  |
| C-C_R | -42.47743800 | 3.85752300  | 13.38845200 L |
| H-H_  | -41.77861400 | 4.66800600  | 13.56577400 L |
| C-C_R | -44.29347400 | 2.47071500  | 14.11804200 L |
| H-H_  | -45.01376100 | 2.18008300  | 14.87384700 L |
| C-C_R | -43.40116300 | 3.50694800  | 14.36557400 L |
| H-H_  | -43.42389200 | 4.03548000  | 15.31166300 L |
| C-C_R | -42.44765700 | 3.19089700  | 12.17380600 L |
| C-C_R | -43.33754000 | 2.14249600  | 11.92802600 L |
| H-H_  | -41.73417600 | 3.47514400  | 11.40934600 L |
| N-N_R | -43.30506800 | 1.45460500  | 10.69610000 L |
| C-C_R | -44.26100300 | 1.78503700  | 12.91348600 L |
| C-C_R | -42.07468600 | 1.12943700  | 10.10305400 L |
| C-C_R | -44.51024500 | 1.07187200  | 10.07330500 L |
| H-H_  | -44.94656500 | 0.96667000  | 12.72924000 L |
| C-C_R | -41.91703500 | 1.20530000  | 8.71452500 L  |
| C-C_R | -40.98403200 | 0.72967100  | 10.88247100 L |
| C-C_R | -45.60317700 | 1.94375800  | 10.05210100 L |
| C-C_R | -44.63041900 | -0.18453100 | 9.47660900 L  |

|       |              |             |               |
|-------|--------------|-------------|---------------|
| H-H_  | -42.74214900 | 1.54968300  | 8.10266400 L  |
| C-C_R | -40.71498800 | 0.86072100  | 8.12469200 L  |
| H-H_  | -41.09012600 | 0.67160300  | 11.95885700 L |
| C-C_R | -39.77979000 | 0.40788500  | 10.28692200 L |
| C-C_R | -46.79016400 | 1.55751500  | 9.44994300 L  |
| H-H_  | -45.51076800 | 2.92200900  | 10.50782400 L |
| H-H_  | -43.78920000 | -0.86701400 | 9.49874100 L  |
| C-C_R | -45.81787900 | -0.55782200 | 8.86573000 L  |
| C-C_R | -39.62664600 | 0.44048400  | 8.89699500 L  |
| H-H_  | -40.61382100 | 0.94559500  | 7.05008400 L  |
| H-H_  | -38.93351800 | 0.11681200  | 10.89608000 L |
| H-H_  | -47.62852800 | 2.24504600  | 9.43836300 L  |
| C-C_R | -46.90659900 | 0.30851700  | 8.85096700 L  |
| H-H_  | -45.89519500 | -1.53853600 | 8.40965900 L  |
| C-C_R | -38.31431600 | 0.11864100  | 8.30880000 L  |
| H-H_  | -47.83615200 | 0.01117900  | 8.37996100 L  |
| N-N_R | -37.26699600 | 0.47400100  | 9.03734500 L  |
| C-C_R | -38.11844400 | -0.49524800 | 7.02815100 L  |
| C-C_R | -36.04666100 | 0.35757200  | 8.51404800 L  |
| N-N_R | -36.91919600 | -0.52511400 | 6.47768500 L  |
| C-C_R | -39.17997700 | -1.16598500 | 6.25123200 L  |
| C-C_R | -35.86837900 | -0.07098000 | 7.17613700 L  |
| C-C_R | -34.89405700 | 0.70960500  | 9.28079200 L  |
| C-C_R | -40.20238000 | -1.90325900 | 6.85753200 L  |
| C-C_R | -39.12371000 | -1.13911700 | 4.85529600 L  |
| C-C_R | -34.57098700 | -0.07704100 | 6.59331600 L  |
| C-C_R | -33.64563900 | 0.67336100  | 8.70121300 L  |
| C-C_R | -35.05012800 | 1.13351300  | 10.63216000 L |
| C-C_R | -41.14914400 | -2.56389700 | 6.09902000 L  |
| H-H_  | -40.24266200 | -1.98344500 | 7.93625700 L  |
| H-H_  | -38.31520500 | -0.60038100 | 4.37673200 L  |
| C-C_R | -40.08024800 | -1.77816800 | 4.08900900 L  |
| C-C_R | -33.45093400 | 0.31830000  | 7.34862800 L  |
| C-C_R | -34.44985000 | -0.55956600 | 5.26228800 L  |
| H-H_  | -32.78987600 | 0.97288200  | 9.29253600 L  |
| N-N_R | -35.15122800 | 1.48157400  | 11.73211600 L |
| H-H_  | -41.92206100 | -3.14731600 | 6.58383000 L  |
| C-C_R | -41.11330400 | -2.49631300 | 4.70136200 L  |
| H-H_  | -40.03610800 | -1.72283400 | 3.00871300 L  |
| N-N_R | -34.34902200 | -0.95636300 | 4.17643000 L  |
| N-N_R | -42.09356100 | -3.14404600 | 3.93332800 L  |
| C-C_R | -43.43597900 | -3.15007300 | 4.36440100 L  |
| C-C_R | -41.74605800 | -3.76839100 | 2.71699700 L  |
| C-C_R | -44.00656200 | -2.00262600 | 4.91908500 L  |

|       |              |             |               |
|-------|--------------|-------------|---------------|
| C-C_R | -44.21384800 | -4.30314200 | 4.23483800 L  |
| C-C_R | -42.57851500 | -3.65613100 | 1.60183400 L  |
| C-C_R | -40.56307100 | -4.50578400 | 2.61472400 L  |
| H-H_  | -43.40806100 | -1.10458700 | 5.01354300 L  |
| C-C_R | -45.32788500 | -2.01187400 | 5.33964100 L  |
| H-H_  | -43.77377600 | -5.19691100 | 3.81056600 L  |
| C-C_R | -45.53860800 | -4.30053700 | 4.64657900 L  |
| H-H_  | -43.49191800 | -3.07747400 | 1.67505000 L  |
| C-C_R | -42.23603000 | -4.27812900 | 0.40990200 L  |
| H-H_  | -39.91804900 | -4.59974700 | 3.47961900 L  |
| C-C_R | -40.22126300 | -5.10886600 | 1.41468600 L  |
| H-H_  | -45.75419800 | -1.11076300 | 5.76558500 L  |
| C-C_R | -46.10296400 | -3.15925500 | 5.20461200 L  |
| H-H_  | -46.13000500 | -5.20228300 | 4.54164300 L  |
| C-C_R | -41.05443100 | -5.00441600 | 0.30676700 L  |
| H-H_  | -42.89113900 | -4.18125100 | -0.44759300 L |
| H-H_  | -39.29922600 | -5.67609700 | 1.35063000 L  |
| H-H_  | -47.13766500 | -3.16047900 | 5.52566600 L  |
| H-H_  | -40.78627100 | -5.48245700 | -0.62764400 L |
| C-C_R | 4.80119400   | -4.52284400 | 11.44259800 L |
| H-H_  | 3.89178700   | -5.10858300 | 11.38618700 L |
| C-C_R | 6.81375800   | -3.89278700 | 12.60039300 L |
| H-H_  | 7.46822400   | -3.97087800 | 13.46082600 L |
| C-C_R | 5.64393300   | -4.64426400 | 12.54268300 L |
| H-H_  | 5.38837900   | -5.31878500 | 13.35264800 L |
| C-C_R | 5.12179900   | -3.66472100 | 10.40478100 L |
| C-C_R | 6.29632000   | -2.90422500 | 10.46439300 L |
| H-H_  | 4.47416100   | -3.58190000 | 9.53976400 L  |
| N-N_R | 6.61913600   | -2.02399700 | 9.41777300 L  |
| C-C_R | 7.14204600   | -3.02447200 | 11.57362600 L |
| C-C_R | 5.60620500   | -1.28572300 | 8.78621700 L  |
| C-C_R | 7.95358900   | -1.87333400 | 9.00562100 L  |
| H-H_  | 8.03983100   | -2.42101400 | 11.62991900 L |
| C-C_R | 5.63279500   | -1.09483200 | 7.39926600 L  |
| C-C_R | 4.55282000   | -0.74308000 | 9.53417500 L  |
| C-C_R | 8.80636100   | -2.98182700 | 8.94875800 L  |
| C-C_R | 8.43812000   | -0.60989400 | 8.64874500 L  |
| H-H_  | 6.42058900   | -1.55453800 | 6.81229000 L  |
| C-C_R | 4.64394400   | -0.35725800 | 6.78256500 L  |
| H-H_  | 4.52772500   | -0.88654400 | 10.60731300 L |
| C-C_R | 3.56327600   | -0.01535300 | 8.90541000 L  |
| C-C_R | 10.12147200  | -2.82081200 | 8.54683900 L  |
| H-H_  | 8.42484300   | -3.96304000 | 9.20729600 L  |
| H-H_  | 7.78312200   | 0.24887700  | 8.70586400 L  |

|       |             |             |              |
|-------|-------------|-------------|--------------|
| C-C_R | 9.75472400  | -0.46345100 | 8.24230500 L |
| C-C_R | 3.60357700  | 0.21352900  | 7.52528900 L |
| H-H_  | 4.66086500  | -0.23796600 | 5.70699700 L |
| H-H_  | 2.73627200  | 0.39057400  | 9.47404400 L |
| H-H_  | 10.77076300 | -3.68756800 | 8.49697900 L |
| C-C_R | 10.60229100 | -1.56566800 | 8.19114500 L |
| H-H_  | 10.12112000 | 0.52025200  | 7.97406500 L |
| C-C_R | 2.50006200  | 0.96650500  | 6.88676700 L |
| H-H_  | 11.63292600 | -1.44662200 | 7.87718700 L |
| N-N_R | 1.30815400  | 0.72527500  | 7.41538500 L |
| C-C_R | 2.64729600  | 1.82639500  | 5.77382300 L |
| C-C_R | 0.22344000  | 1.22759700  | 6.81434100 L |
| N-N_R | 1.56600000  | 2.25480900  | 5.11993200 L |
| C-C_R | 3.93268600  | 2.34589100  | 5.27016900 L |
| C-C_R | 0.36526400  | 1.94641800  | 5.59446300 L |
| C-C_R | -1.06800400 | 1.00225500  | 7.37035000 L |
| C-C_R | 4.99660900  | 2.66504200  | 6.12155600 L |
| C-C_R | 4.08003400  | 2.60522900  | 3.90355800 L |
| C-C_R | -0.81772400 | 2.36115800  | 4.90261400 L |
| C-C_R | -2.22050900 | 1.46261000  | 6.69505600 L |
| C-C_R | -1.14045000 | 0.24299400  | 8.56653900 L |
| C-C_R | 6.17700500  | 3.18316700  | 5.62546100 L |
| H-H_  | 4.88585700  | 2.53892500  | 7.19299500 L |
| H-H_  | 3.24792700  | 2.39712700  | 3.24306000 L |
| C-C_R | 5.26178200  | 3.11237800  | 3.39728000 L |
| C-C_R | -2.05812200 | 2.10604100  | 5.45222900 L |
| C-C_R | -0.69954600 | 3.06882400  | 3.67570800 L |
| N-N_R | -1.19028900 | -0.37747800 | 9.54562100 L |
| H-H_  | 6.98311800  | 3.44937300  | 6.29912600 L |
| C-C_R | 6.33080700  | 3.40013400  | 4.25244800 L |
| H-H_  | 5.36694300  | 3.28487900  | 2.33264900 L |
| H-H_  | -2.93630800 | 2.45859200  | 4.92900100 L |
| N-N_R | -0.61629500 | 3.64740300  | 2.67502400 L |
| N-N_R | 7.53626100  | 3.91617000  | 3.74592700 L |
| C-C_R | 8.76240400  | 3.45435300  | 4.25473600 L |
| C-C_R | 7.51265900  | 4.89124200  | 2.72731500 L |
| C-C_R | 8.93732800  | 2.09756600  | 4.54659900 L |
| C-C_R | 9.82398600  | 4.33883700  | 4.46953500 L |
| C-C_R | 8.44672500  | 4.85215600  | 1.68901100 L |
| C-C_R | 6.54905000  | 5.90340800  | 2.74483000 L |
| H-H_  | 8.12228500  | 1.40681200  | 4.36923500 L |
| C-C_R | 10.14820500 | 1.64231800  | 5.04512000 L |
| H-H_  | 9.68882900  | 5.39153000  | 4.25275900 L |
| C-C_R | 11.03223700 | 3.87216800  | 4.96086900 L |



|       |              |             |               |
|-------|--------------|-------------|---------------|
| H-H_  | 9.18558400   | 4.05922200  | 1.66526500 L  |
| C-C_R | 8.41761200   | 5.81473000  | 0.69227100 L  |
| H-H_  | 5.82855800   | 5.94028600  | 3.55336200 L  |
| C-C_R | 6.52134700   | 6.85322200  | 1.73571300 L  |
| H-H_  | 10.27049000  | 0.58502100  | 5.25346200 L  |
| C-C_R | 11.20392400  | 2.52223600  | 5.25345500 L  |
| H-H_  | 11.84494800  | 4.57134400  | 5.12403300 L  |
| C-C_R | 7.45529800   | 6.81818700  | 0.70687300 L  |
| H-H_  | 9.14438400   | 5.77038600  | -0.11003100 L |
| H-H_  | 5.76800100   | 7.63130900  | 1.76204700 L  |
| H-H_  | 12.15299600  | 2.16278900  | 5.63277900 L  |
| H-H_  | 7.43128300   | 7.56399200  | -0.07792500 L |
| C-C_R | -12.58551500 | 4.89399400  | 13.30626700 L |
| H-H_  | -11.88669100 | 5.70447600  | 13.48358800 L |
| C-C_R | -14.40155100 | 3.50718500  | 14.03585700 L |
| H-H_  | -15.12183800 | 3.21655300  | 14.79166200 L |
| C-C_R | -13.50924000 | 4.54341900  | 14.28338800 L |
| H-H_  | -13.53196900 | 5.07195100  | 15.22947700 L |
| C-C_R | -12.55573400 | 4.22736700  | 12.09162000 L |
| C-C_R | -13.44561700 | 3.17896700  | 11.84584000 L |
| H-H_  | -11.84225300 | 4.51161400  | 11.32716100 L |
| N-N_R | -13.41314500 | 2.49107600  | 10.61391400 L |
| C-C_R | -14.36908000 | 2.82150700  | 12.83130100 L |
| C-C_R | -12.18276300 | 2.16590800  | 10.02086900 L |
| C-C_R | -14.61832100 | 2.10834200  | 9.99112000 L  |
| H-H_  | -15.05464200 | 2.00314000  | 12.64705500 L |
| C-C_R | -12.02511100 | 2.24177000  | 8.63233900 L  |
| C-C_R | -11.09210900 | 1.76614100  | 10.80028600 L |
| C-C_R | -15.71125400 | 2.98022900  | 9.96991600 L  |
| C-C_R | -14.73849600 | 0.85194000  | 9.39442300 L  |
| H-H_  | -12.85022500 | 2.58615400  | 8.02047900 L  |
| C-C_R | -10.82306500 | 1.89719200  | 8.04250600 L  |
| H-H_  | -11.19820300 | 1.70807400  | 11.87667100 L |
| C-C_R | -9.88786600  | 1.44435500  | 10.20473700 L |
| C-C_R | -16.89824100 | 2.59398600  | 9.36775700 L  |
| H-H_  | -15.61884500 | 3.95847900  | 10.42563900 L |
| H-H_  | -13.89727600 | 0.16945700  | 9.41655600 L  |
| C-C_R | -15.92595600 | 0.47864800  | 8.78354400 L  |
| C-C_R | -9.73472300  | 1.47695400  | 8.81480900 L  |
| H-H_  | -10.72189800 | 1.98206500  | 6.96789900 L  |
| H-H_  | -9.04159500  | 1.15328200  | 10.81389500 L |
| H-H_  | -17.73660500 | 3.28151700  | 9.35617700 L  |
| C-C_R | -17.01467600 | 1.34498800  | 8.76878100 L  |
| H-H_  | -16.00227200 | -0.50203100 | 8.32747100 L  |

|       |              |             |               |
|-------|--------------|-------------|---------------|
| C-C_R | -8.42239300  | 1.15511100  | 8.22661500 L  |
| H-H_  | -17.94422800 | 1.04765000  | 8.29777500 L  |
| N-N_R | -7.37507200  | 1.51047100  | 8.95515900 L  |
| C-C_R | -8.22652000  | 0.54122200  | 6.94596600 L  |
| C-C_R | -6.15373900  | 1.39407700  | 8.43186000 L  |
| N-N_R | -7.02727300  | 0.51135700  | 6.39549900 L  |
| C-C_R | -9.28805400  | -0.12951500 | 6.16904600 L  |
| C-C_R | -5.97645600  | 0.96549000  | 7.09395200 L  |
| C-C_R | -5.00213400  | 1.74607500  | 9.19860700 L  |
| C-C_R | -10.31045700 | -0.86678900 | 6.77534600 L  |
| C-C_R | -9.23178600  | -0.10264700 | 4.77311000 L  |
| C-C_R | -4.67906300  | 0.95942900  | 6.51113100 L  |
| C-C_R | -3.75371600  | 1.70983200  | 8.61902700 L  |
| C-C_R | -5.15820400  | 2.16998300  | 10.54997400 L |
| C-C_R | -11.25722000 | -1.52742600 | 6.01683500 L  |
| H-H_  | -10.35073900 | -0.94697500 | 7.85407200 L  |
| H-H_  | -8.42328200  | 0.43609000  | 4.29454600 L  |
| C-C_R | -10.18832500 | -0.74169700 | 4.00682400 L  |
| C-C_R | -3.55901100  | 1.35477100  | 7.26644300 L  |
| C-C_R | -4.55692700  | 0.47693900  | 5.18010000 L  |
| H-H_  | -2.89795300  | 2.00935300  | 9.21035100 L  |
| N-N_R | -5.25930500  | 2.51804500  | 11.64993100 L |
| H-H_  | -12.02913900 | -2.11081100 | 6.50164200 L  |
| C-C_R | -11.22138100 | -1.45984300 | 4.61917600 L  |
| H-H_  | -10.14418400 | -0.68636400 | 2.92652800 L  |
| N-N_R | -4.45610000  | 0.08014200  | 4.09424200 L  |
| N-N_R | -12.20163800 | -2.10757600 | 3.85114300 L  |
| C-C_R | -13.54405600 | -2.11360300 | 4.28221500 L  |
| C-C_R | -11.85413500 | -2.73192100 | 2.63481200 L  |
| C-C_R | -14.11463900 | -0.96615600 | 4.83689900 L  |
| C-C_R | -14.32192500 | -3.26667100 | 4.15265200 L  |
| C-C_R | -12.68659200 | -2.61966000 | 1.51964800 L  |
| C-C_R | -10.67114800 | -3.46931400 | 2.53253800 L  |
| H-H_  | -13.51613800 | -0.06811600 | 4.93135700 L  |
| C-C_R | -15.43496200 | -0.97536900 | 5.25745200 L  |
| H-H_  | -13.88185300 | -4.16044000 | 3.72838000 L  |
| C-C_R | -15.64668400 | -3.26406600 | 4.56439400 L  |
| H-H_  | -13.59999500 | -2.04100400 | 1.59286500 L  |
| C-C_R | -12.34410600 | -3.24165800 | 0.32771600 L  |
| H-H_  | -10.02612500 | -3.56327600 | 3.39743300 L  |
| C-C_R | -10.32934000 | -4.07239500 | 1.33250000 L  |
| H-H_  | -15.86227500 | -0.07429300 | 5.68339900 L  |
| C-C_R | -16.21104100 | -2.12278500 | 5.12242700 L  |
| H-H_  | -16.23808200 | -4.16581300 | 4.45945800 L  |

|       |              |             |               |
|-------|--------------|-------------|---------------|
| C-C_R | -11.16250800 | -3.96794600 | 0.22458200 L  |
| H-H_  | -12.99921600 | -3.14478000 | -0.52977900 L |
| H-H_  | -9.40730300  | -4.63962700 | 1.26844400 L  |
| H-H_  | -17.24574200 | -2.12400900 | 5.44348100 L  |
| H-H_  | -10.89434700 | -4.44598700 | -0.70982900 L |
| C-C_R | 34.69411600  | -3.48633900 | 11.36041000 L |
| H-H_  | 33.78371000  | -4.07211300 | 11.30400200 L |
| C-C_R | 36.70568100  | -2.85631600 | 12.51820800 L |
| H-H_  | 37.36014700  | -2.93440700 | 13.37864100 L |
| C-C_R | 35.53585700  | -3.60779300 | 12.46049700 L |
| H-H_  | 35.28130100  | -4.28228000 | 13.27045900 L |
| C-C_R | 35.01372300  | -2.62825000 | 10.32259500 L |
| C-C_R | 36.18824300  | -1.86775500 | 10.38220700 L |
| H-H_  | 34.36608400  | -2.54542900 | 9.45757800 L  |
| N-N_R | 36.51106000  | -0.98752600 | 9.33558700 L  |
| C-C_R | 37.03396900  | -1.98800100 | 11.49144100 L |
| C-C_R | 35.49812900  | -0.24925200 | 8.70403100 L  |
| C-C_R | 37.84551300  | -0.83686400 | 8.92343600 L  |
| H-H_  | 37.93175400  | -1.38454400 | 11.54773400 L |
| C-C_R | 35.52571800  | -0.05832700 | 7.31707800 L  |
| C-C_R | 34.44474300  | 0.29339000  | 9.45199000 L  |
| C-C_R | 38.69828400  | -1.94535700 | 8.86657200 L  |
| C-C_R | 38.33104200  | 0.42661100  | 8.56655700 L  |
| H-H_  | 36.31251200  | -0.51806700 | 6.73010400 L  |
| C-C_R | 34.53586700  | 0.67921300  | 6.70038000 L  |
| H-H_  | 34.41964800  | 0.14992600  | 10.52512800 L |
| C-C_R | 33.45519900  | 1.02111700  | 8.82322400 L  |
| C-C_R | 40.01339500  | -1.78434200 | 8.46465400 L  |
| H-H_  | 38.31676600  | -2.92657000 | 9.12511100 L  |
| H-H_  | 37.67504500  | 1.28534800  | 8.62367800 L  |
| C-C_R | 39.64664700  | 0.57301900  | 8.16011900 L  |
| C-C_R | 33.49550000  | 1.25000000  | 7.44310400 L  |
| H-H_  | 34.55378800  | 0.79853900  | 5.62480900 L  |
| H-H_  | 32.62819500  | 1.42704500  | 9.39185800 L  |
| H-H_  | 40.66368600  | -2.65106300 | 8.41479000 L  |
| C-C_R | 40.49421400  | -0.52919800 | 8.10895900 L  |
| H-H_  | 40.01304300  | 1.55672200  | 7.89187900 L  |
| C-C_R | 32.39198600  | 2.00297500  | 6.80458100 L  |
| H-H_  | 41.52484900  | -0.41015200 | 7.79500100 L  |
| N-N_R | 31.20007700  | 1.76174500  | 7.33319900 L  |
| C-C_R | 32.53921900  | 2.86286600  | 5.69163800 L  |
| C-C_R | 30.11536300  | 2.26406800  | 6.73215600 L  |
| N-N_R | 31.45792300  | 3.29128000  | 5.03774700 L  |
| C-C_R | 33.82461000  | 3.38236200  | 5.18798400 L  |

|       |             |            |               |
|-------|-------------|------------|---------------|
| C-C_R | 30.25718800 | 2.98288800 | 5.51227700 L  |
| C-C_R | 28.82391900 | 2.03872500 | 7.28816500 L  |
| C-C_R | 34.88853300 | 3.70151300 | 6.03937100 L  |
| C-C_R | 33.97195700 | 3.64170000 | 3.82137200 L  |
| C-C_R | 29.07420000 | 3.39762800 | 4.82042900 L  |
| C-C_R | 27.67241400 | 2.49911500 | 6.61286800 L  |
| C-C_R | 28.75147300 | 1.27946400 | 8.48435300 L  |
| C-C_R | 36.06892800 | 4.21963800 | 5.54327500 L  |
| H-H_  | 34.77778000 | 3.57539500 | 7.11080900 L  |
| H-H_  | 33.13985000 | 3.43359700 | 3.16087400 L  |
| C-C_R | 35.15370600 | 4.14884900 | 3.31509400 L  |
| C-C_R | 27.83380100 | 3.14251200 | 5.37004300 L  |
| C-C_R | 29.19337700 | 4.10532900 | 3.59352000 L  |
| N-N_R | 28.70263400 | 0.65902700 | 9.46343200 L  |
| H-H_  | 36.87504200 | 4.48584400 | 6.21694000 L  |
| C-C_R | 36.22273000 | 4.43660400 | 4.17026200 L  |
| H-H_  | 35.25886600 | 4.32134900 | 2.25046400 L  |
| H-H_  | 26.95561500 | 3.49506200 | 4.84681500 L  |
| N-N_R | 29.27562800 | 4.68387300 | 2.59283900 L  |
| N-N_R | 37.42818400 | 4.95264000 | 3.66374200 L  |
| C-C_R | 38.65532600 | 4.49085800 | 4.17254800 L  |
| C-C_R | 37.40458200 | 5.92771200 | 2.64512900 L  |
| C-C_R | 38.82925100 | 3.13403700 | 4.46441300 L  |
| C-C_R | 39.71590900 | 5.37530800 | 4.38734900 L  |
| C-C_R | 38.33864800 | 5.88862700 | 1.60682500 L  |
| C-C_R | 36.44097300 | 6.93987900 | 2.66264400 L  |
| H-H_  | 38.01420800 | 2.44328300 | 4.28704900 L  |
| C-C_R | 40.04012900 | 2.67878900 | 4.96293400 L  |
| H-H_  | 39.58075200 | 6.42800000 | 4.17057400 L  |
| C-C_R | 40.92416100 | 4.90863900 | 4.87868300 L  |
| H-H_  | 39.07750700 | 5.09569200 | 1.58307900 L  |
| C-C_R | 38.30953600 | 6.85120000 | 0.61008600 L  |
| H-H_  | 35.72048200 | 6.97675700 | 3.47117600 L  |
| C-C_R | 36.41327000 | 7.88969200 | 1.65352800 L  |
| H-H_  | 40.16241400 | 1.62149200 | 5.17127700 L  |
| C-C_R | 41.09584700 | 3.55870700 | 5.17127000 L  |
| H-H_  | 41.73687200 | 5.60781400 | 5.04184700 L  |
| C-C_R | 37.34722100 | 7.85465800 | 0.62468700 L  |
| H-H_  | 39.03630700 | 6.80685600 | -0.19221600 L |
| H-H_  | 35.65992400 | 8.66778000 | 1.67986200 L  |
| H-H_  | 42.04491900 | 3.19925900 | 5.55059300 L  |
| H-H_  | 37.32320600 | 8.60046200 | -0.16011100 L |
| C-C_R | 17.30640800 | 5.93046400 | 13.22408100 L |
| H-H_  | 18.00523200 | 6.74094700 | 13.40140200 L |

|       |             |            |               |
|-------|-------------|------------|---------------|
| C-C_R | 15.49037300 | 4.54365600 | 13.95367100 L |
| H-H_  | 14.77008500 | 4.25302400 | 14.70947600 L |
| C-C_R | 16.38268400 | 5.57988900 | 14.20120300 L |
| H-H_  | 16.35995400 | 6.10842100 | 15.14729200 L |
| C-C_R | 17.33619000 | 5.26383800 | 12.00943500 L |
| C-C_R | 16.44630700 | 4.21543700 | 11.76365500 L |
| H-H_  | 18.04967000 | 5.54808500 | 11.24497500 L |
| N-N_R | 16.47877900 | 3.52754600 | 10.53172900 L |
| C-C_R | 15.52284300 | 3.85797800 | 12.74911500 L |
| C-C_R | 17.70916100 | 3.20237800 | 9.93868300 L  |
| C-C_R | 15.27360200 | 3.14481300 | 9.90893400 L  |
| H-H_  | 14.83728200 | 3.03961100 | 12.56486900 L |
| C-C_R | 17.86681200 | 3.27824100 | 8.55015400 L  |
| C-C_R | 18.79981500 | 2.80261100 | 10.71810000 L |
| C-C_R | 14.18067000 | 4.01669900 | 9.88773000 L  |
| C-C_R | 15.15342800 | 1.88841000 | 9.31223700 L  |
| H-H_  | 17.04169800 | 3.62262400 | 7.93829300 L  |
| C-C_R | 19.06885800 | 2.93366200 | 7.96032100 L  |
| H-H_  | 18.69372000 | 2.74454400 | 11.79448500 L |
| C-C_R | 20.00405700 | 2.48082500 | 10.12255100 L |
| C-C_R | 12.99368200 | 3.63045600 | 9.28557200 L  |
| H-H_  | 14.27307800 | 4.99495000 | 10.34345300 L |
| H-H_  | 15.99464700 | 1.20592700 | 9.33437000 L  |
| C-C_R | 13.96596700 | 1.51511800 | 8.70135900 L  |
| C-C_R | 20.15720100 | 2.51342400 | 8.73262400 L  |
| H-H_  | 19.17002500 | 3.01853500 | 6.88571300 L  |
| H-H_  | 20.85032900 | 2.18975300 | 10.73170900 L |
| H-H_  | 12.15631800 | 4.31802200 | 9.27398900 L  |
| C-C_R | 12.87724700 | 2.38145800 | 8.68659600 L  |
| H-H_  | 13.88965100 | 0.53444000 | 8.24528500 L  |
| C-C_R | 21.47053000 | 2.19161600 | 8.14442700 L  |
| H-H_  | 11.94769500 | 2.08412000 | 8.21559000 L  |
| N-N_R | 22.51685100 | 2.54694100 | 8.87297400 L  |
| C-C_R | 21.66540300 | 1.57769300 | 6.86378000 L  |
| C-C_R | 23.73818400 | 2.43054800 | 8.34967400 L  |
| N-N_R | 22.86465000 | 1.54782700 | 6.31331400 L  |
| C-C_R | 20.60387000 | 0.90695500 | 6.08686100 L  |
| C-C_R | 23.91646700 | 2.00199600 | 7.01176400 L  |
| C-C_R | 24.88979000 | 2.78254600 | 9.11642100 L  |
| C-C_R | 19.58146600 | 0.16968100 | 6.69316100 L  |
| C-C_R | 20.66013700 | 0.93382300 | 4.69092500 L  |
| C-C_R | 25.21286000 | 1.99589900 | 6.42894500 L  |
| C-C_R | 26.13820700 | 2.74630200 | 8.53684200 L  |
| C-C_R | 24.73371900 | 3.20645400 | 10.46778900 L |

|       |              |             |               |
|-------|--------------|-------------|---------------|
| C-C_R | 18.63470300  | -0.49095600 | 5.93464900 L  |
| H-H_  | 19.54118500  | 0.08949600  | 7.77188600 L  |
| H-H_  | 21.46864200  | 1.47256000  | 4.21236100 L  |
| C-C_R | 19.70359800  | 0.29477300  | 3.92463800 L  |
| C-C_R | 26.33291200  | 2.39124100  | 7.18425700 L  |
| C-C_R | 25.33499600  | 1.51340900  | 5.09791400 L  |
| H-H_  | 26.99397000  | 3.04582300  | 9.12816500 L  |
| N-N_R | 24.63261900  | 3.55451500  | 11.56774500 L |
| H-H_  | 17.86278500  | -1.07434100 | 6.41945600 L  |
| C-C_R | 18.67054200  | -0.42337300 | 4.53699100 L  |
| H-H_  | 19.74773900  | 0.35010600  | 2.84434200 L  |
| N-N_R | 25.43582300  | 1.11661200  | 4.01205600 L  |
| N-N_R | 17.69028500  | -1.07110600 | 3.76895700 L  |
| C-C_R | 16.34786700  | -1.07713200 | 4.20003000 L  |
| C-C_R | 18.03778800  | -1.69545000 | 2.55262600 L  |
| C-C_R | 15.77728400  | 0.07031500  | 4.75471400 L  |
| C-C_R | 15.56999800  | -2.23020100 | 4.07046700 L  |
| C-C_R | 17.20533100  | -1.58319000 | 1.43746300 L  |
| C-C_R | 19.22077500  | -2.43284300 | 2.45035300 L  |
| H-H_  | 16.37578600  | 0.96835400  | 4.84917200 L  |
| C-C_R | 14.45696100  | 0.06110100  | 5.17526700 L  |
| H-H_  | 16.01007000  | -3.12397000 | 3.64619500 L  |
| C-C_R | 14.24523900  | -2.22759600 | 4.48220800 L  |
| H-H_  | 16.29192800  | -1.00453300 | 1.51067900 L  |
| C-C_R | 17.54781700  | -2.20518800 | 0.24553100 L  |
| H-H_  | 19.86679700  | -2.52677100 | 3.31524500 L  |
| C-C_R | 19.56258300  | -3.03592500 | 1.25031500 L  |
| H-H_  | 14.02964800  | 0.96217800  | 5.60121400 L  |
| C-C_R | 13.68088200  | -1.08631500 | 5.04024100 L  |
| H-H_  | 13.65384100  | -3.12934200 | 4.37727200 L  |
| C-C_R | 18.72941600  | -2.93147500 | 0.14239600 L  |
| H-H_  | 16.89270800  | -2.10831000 | -0.61196400 L |
| H-H_  | 20.48462100  | -3.60315600 | 1.18625900 L  |
| H-H_  | 12.64618200  | -1.08753900 | 5.36129500 L  |
| H-H_  | 18.99757600  | -3.40951600 | -0.79201500 L |
| C-C_R | -25.14053200 | -4.74889600 | 3.63143400 L  |
| H-H_  | -26.04993900 | -5.33463500 | 3.57502300 L  |
| C-C_R | -23.12796800 | -4.11883900 | 4.78922900 L  |
| H-H_  | -22.47350200 | -4.19693000 | 5.64966200 L  |
| C-C_R | -24.29779200 | -4.87031600 | 4.73151900 L  |
| H-H_  | -24.55334700 | -5.54483700 | 5.54148400 L  |
| C-C_R | -24.82092600 | -3.89080700 | 2.59361900 L  |
| C-C_R | -23.64640600 | -3.13031100 | 2.65323200 L  |
| H-H_  | -25.46755800 | -3.80805400 | 1.72959400 L  |

|       |              |             |               |
|-------|--------------|-------------|---------------|
| N-N_R | -23.32258900 | -2.25004900 | 1.60660900 L  |
| C-C_R | -22.80067300 | -3.25066000 | 3.76346000 L  |
| C-C_R | -24.33552000 | -1.51177400 | 0.97505300 L  |
| C-C_R | -21.98813000 | -2.09948800 | 1.19545200 L  |
| H-H_  | -21.90189500 | -2.64706600 | 3.81875500 L  |
| C-C_R | -24.30892400 | -1.32098600 | -0.41090300 L |
| C-C_R | -25.38890600 | -0.96913200 | 1.72301100 L  |
| C-C_R | -21.13636400 | -3.20791400 | 1.13759700 L  |
| C-C_R | -21.50360600 | -0.83594600 | 0.83758100 L  |
| H-H_  | -23.52113700 | -1.78058900 | -0.99887400 L |
| C-C_R | -25.29878100 | -0.58334400 | -1.02859600 L |
| H-H_  | -25.41500000 | -1.11263100 | 2.79615200 L  |
| C-C_R | -26.37845000 | -0.24140500 | 1.09424600 L  |
| C-C_R | -19.82025400 | -3.04686400 | 0.73567500 L  |
| H-H_  | -21.51688300 | -4.18909200 | 1.39613200 L  |
| H-H_  | -22.15860400 | 0.02282600  | 0.89470000 L  |
| C-C_R | -20.18700200 | -0.68950300 | 0.43114100 L  |
| C-C_R | -26.33914800 | -0.01255700 | -0.28587200 L |
| H-H_  | -25.28086100 | -0.46401800 | -2.10416700 L |
| H-H_  | -27.20545400 | 0.16452300  | 1.66288000 L  |
| H-H_  | -19.17095700 | -3.91372200 | 0.68680900 L  |
| C-C_R | -19.33943500 | -1.79172000 | 0.37998100 L  |
| H-H_  | -19.82060600 | 0.29420000  | 0.16290100 L  |
| C-C_R | -27.44166300 | 0.74045300  | -0.92439700 L |
| H-H_  | -18.30980000 | -1.67270900 | 0.06602500 L  |
| N-N_R | -28.63357200 | 0.49922300  | -0.39577900 L |
| C-C_R | -27.29443000 | 1.60034300  | -2.03734100 L |
| C-C_R | -29.71828000 | 1.00144300  | -0.99582800 L |
| N-N_R | -28.37572600 | 2.02875700  | -2.69123200 L |
| C-C_R | -26.00903300 | 2.11973700  | -2.54000000 L |
| C-C_R | -29.57646100 | 1.72036600  | -2.21670100 L |
| C-C_R | -31.00973000 | 0.77620300  | -0.44081400 L |
| C-C_R | -24.94511000 | 2.43888800  | -1.68861300 L |
| C-C_R | -25.86169200 | 2.37917800  | -3.90760600 L |
| C-C_R | -30.76044900 | 2.13507100  | -2.90854700 L |
| C-C_R | -32.16223500 | 1.23655800  | -1.11610800 L |
| C-C_R | -31.08217600 | 0.01694200  | 0.75537500 L  |
| C-C_R | -23.76471500 | 2.95701300  | -2.18470800 L |
| H-H_  | -25.05686800 | 2.31283800  | -0.61816700 L |
| H-H_  | -26.69479800 | 2.17104000  | -4.56810200 L |
| C-C_R | -24.67994300 | 2.88632600  | -4.41388400 L |
| C-C_R | -31.99984200 | 1.87988700  | -2.35794100 L |
| C-C_R | -30.64127200 | 2.84277200  | -4.13545600 L |
| N-N_R | -31.13200900 | -0.60363200 | 1.73545200 L  |

|       |              |            |               |
|-------|--------------|------------|---------------|
| H-H_  | -22.95860700 | 3.22332200 | -1.51203800 L |
| C-C_R | -23.61091900 | 3.17408200 | -3.55871600 L |
| H-H_  | -24.57478300 | 3.05882700 | -5.47851500 L |
| H-H_  | -32.87903300 | 2.23250500 | -2.88216000 L |
| N-N_R | -30.55802100 | 3.42135100 | -5.13614000 L |
| N-N_R | -22.40646400 | 3.69008300 | -4.06523400 L |
| C-C_R | -21.17932200 | 3.22830200 | -3.55642800 L |
| C-C_R | -22.42906100 | 4.66508800 | -5.08285400 L |
| C-C_R | -21.00439100 | 1.87141200 | -3.26357100 L |
| C-C_R | -20.11774000 | 4.11278500 | -3.34162900 L |
| C-C_R | -21.49500100 | 4.62610400 | -6.12215300 L |
| C-C_R | -23.39266900 | 5.67725400 | -5.06534000 L |
| H-H_  | -21.81944100 | 1.18076100 | -3.44192900 L |
| C-C_R | -19.79351400 | 1.41616400 | -2.76504900 L |
| H-H_  | -20.25289700 | 5.16547800 | -3.55840500 L |
| C-C_R | -18.90948900 | 3.64611600 | -2.85029500 L |
| H-H_  | -20.75614200 | 3.83317000 | -6.14589900 L |
| C-C_R | -21.52411300 | 5.58867800 | -7.11889300 L |
| H-H_  | -24.11316700 | 5.71423400 | -4.25780200 L |
| C-C_R | -23.42037900 | 6.62717000 | -6.07545100 L |
| H-H_  | -19.67123500 | 0.35897000 | -2.55770200 L |
| C-C_R | -18.73780200 | 2.29618400 | -2.55770900 L |
| H-H_  | -18.09677700 | 4.34529200 | -2.68713100 L |
| C-C_R | -22.48642800 | 6.59213500 | -7.10429100 L |
| H-H_  | -20.79734200 | 5.54433400 | -7.92119500 L |
| H-H_  | -24.17372500 | 7.40525700 | -6.04911700 L |
| H-H_  | -17.78873000 | 1.93673700 | -2.17838500 L |
| H-H_  | -22.51044300 | 7.33794000 | -7.88908900 L |
| C-C_R | -42.52724100 | 4.66794200 | 5.49510300 L  |
| H-H_  | -41.82841700 | 5.47842500 | 5.67242400 L  |
| C-C_R | -44.34327600 | 3.28113300 | 6.22469300 L  |
| H-H_  | -45.06356400 | 2.99050100 | 6.98049800 L  |
| C-C_R | -43.45096500 | 4.31736700 | 6.47222400 L  |
| H-H_  | -43.47368800 | 4.84579700 | 7.41930800 L  |
| C-C_R | -42.49746000 | 4.00131500 | 4.28045600 L  |
| C-C_R | -43.38734200 | 2.95291500 | 4.03467600 L  |
| H-H_  | -41.78397900 | 4.28556300 | 3.51599700 L  |
| N-N_R | -43.35486400 | 2.26492200 | 2.80374500 L  |
| C-C_R | -44.31080600 | 2.59545600 | 5.02013700 L  |
| C-C_R | -42.12448800 | 1.93985600 | 2.20970500 L  |
| C-C_R | -44.56004100 | 1.88218800 | 2.18095100 L  |
| H-H_  | -44.99636800 | 1.77708900 | 4.83589100 L  |
| C-C_R | -41.96683700 | 2.01571800 | 0.82117500 L  |
| C-C_R | -41.03383400 | 1.54008900 | 2.98912200 L  |



|       |              |             |               |
|-------|--------------|-------------|---------------|
| C-C_R | -45.65297900 | 2.75417700  | 2.15875200 L  |
| C-C_R | -44.68022100 | 0.62588800  | 1.58325900 L  |
| H-H_  | -42.79194500 | 2.36000000  | 0.21031000 L  |
| C-C_R | -40.76479100 | 1.67114000  | 0.23134200 L  |
| H-H_  | -41.13992900 | 1.48202200  | 4.06550700 L  |
| C-C_R | -39.82959200 | 1.21830300  | 2.39357300 L  |
| C-C_R | -46.83996700 | 2.36793400  | 1.55659300 L  |
| H-H_  | -45.56057100 | 3.73242800  | 2.61447500 L  |
| H-H_  | -43.83900200 | -0.05659500 | 1.60539200 L  |
| C-C_R | -45.86768200 | 0.25259600  | 0.97238000 L  |
| C-C_R | -39.67644800 | 1.25090200  | 1.00364500 L  |
| H-H_  | -40.66362400 | 1.75601300  | -0.84326500 L |
| H-H_  | -38.98332000 | 0.92723000  | 3.00273100 L  |
| H-H_  | -47.67832400 | 3.05536300  | 1.54600800 L  |
| C-C_R | -46.95640200 | 1.11893600  | 0.95761700 L  |
| H-H_  | -45.94499100 | -0.72821900 | 0.51730400 L  |
| C-C_R | -38.36411900 | 0.92905900  | 0.41545100 L  |
| H-H_  | -47.88595400 | 0.82159800  | 0.48661100 L  |
| N-N_R | -37.31679800 | 1.28441900  | 1.14399500 L  |
| C-C_R | -38.16824000 | 0.31506800  | -0.86420400 L |
| C-C_R | -36.09646400 | 1.16799100  | 0.62069800 L  |
| N-N_R | -36.96899900 | 0.28530500  | -1.41566500 L |
| C-C_R | -39.22978000 | -0.35556700 | -1.64211800 L |
| C-C_R | -35.91817600 | 0.73933600  | -0.71621700 L |
| C-C_R | -34.94385900 | 1.52002300  | 1.38744300 L  |
| C-C_R | -40.25218300 | -1.09284100 | -1.03581800 L |
| C-C_R | -39.17351200 | -0.32869900 | -3.03805400 L |
| C-C_R | -34.62078900 | 0.73337700  | -1.30003300 L |
| C-C_R | -33.69543500 | 1.48367800  | 0.80885800 L  |
| C-C_R | -35.09993000 | 1.94393100  | 2.73881000 L  |
| C-C_R | -41.19894600 | -1.75347800 | -1.79432900 L |
| H-H_  | -40.29246400 | -1.17302600 | 0.04290800 L  |
| H-H_  | -38.36500700 | 0.21003800  | -3.51661800 L |
| C-C_R | -40.13005100 | -0.96774900 | -3.80434000 L |
| C-C_R | -33.50073700 | 1.12871900  | -0.54472100 L |
| C-C_R | -34.49965200 | 0.25085200  | -2.63106100 L |
| H-H_  | -32.83967900 | 1.78330100  | 1.39918700 L  |
| N-N_R | -35.20103000 | 2.29199300  | 3.83876700 L  |
| H-H_  | -41.97186400 | -2.33689800 | -1.30951900 L |
| C-C_R | -41.16310100 | -1.68599700 | -3.19099300 L |
| H-H_  | -40.08591000 | -0.91241600 | -4.88463600 L |
| N-N_R | -34.39882500 | -0.14594400 | -3.71692000 L |
| N-N_R | -42.14336400 | -2.33362800 | -3.96002100 L |
| C-C_R | -43.48578200 | -2.33965400 | -3.52894900 L |

|       |              |             |               |
|-------|--------------|-------------|---------------|
| C-C_R | -41.79585400 | -2.95807500 | -5.17535800 L |
| C-C_R | -44.05636500 | -1.19220700 | -2.97426500 L |
| C-C_R | -44.26364400 | -3.49282500 | -3.65751700 L |
| C-C_R | -42.62831800 | -2.84571200 | -6.29151600 L |
| C-C_R | -40.61287400 | -3.69536500 | -5.27862600 L |
| H-H_  | -43.45786300 | -0.29416800 | -2.87980700 L |
| C-C_R | -45.37768100 | -1.20155800 | -2.55271400 L |
| H-H_  | -43.82357900 | -4.38649200 | -4.08278400 L |
| C-C_R | -45.58841000 | -3.49011800 | -3.24677000 L |
| H-H_  | -43.54172100 | -2.26705600 | -6.21829900 L |
| C-C_R | -42.28582600 | -3.46781200 | -7.48245300 L |
| H-H_  | -39.96785100 | -3.78932800 | -4.41373100 L |
| C-C_R | -40.27106600 | -4.29844700 | -6.47866400 L |
| H-H_  | -45.80400100 | -0.30034400 | -2.12776500 L |
| C-C_R | -46.15276700 | -2.34883700 | -2.68873700 L |
| H-H_  | -46.17980800 | -4.39186500 | -3.35170600 L |
| C-C_R | -41.10422700 | -4.19410000 | -7.58558800 L |
| H-H_  | -42.94093500 | -3.37093400 | -8.33994800 L |
| H-H_  | -39.34902800 | -4.86567900 | -6.54272000 L |
| H-H_  | -47.18746700 | -2.35006100 | -2.36768300 L |
| H-H_  | -40.83607300 | -4.67203900 | -8.52099300 L |
| C-C_R | 4.86037900   | -4.16986200 | 3.14849000 H  |
| H-H_  | 4.06696300   | -4.85212000 | 2.86582500 H  |
| C-C_R | 6.55284300   | -3.46286300 | 4.69298700 H  |
| H-H_  | 7.07494600   | -3.58545500 | 5.63540400 H  |
| C-C_R | 5.53181200   | -4.34112900 | 4.35283900 H  |
| H-H_  | 5.26232000   | -5.15159000 | 5.01949100 H  |
| C-C_R | 5.21001200   | -3.13923800 | 2.28880500 H  |
| C-C_R | 6.22862900   | -2.24935300 | 2.63510100 H  |
| H-H_  | 4.69590600   | -3.01805200 | 1.34269000 H  |
| N-N_R | 6.58820100   | -1.20164100 | 1.75569500 H  |
| C-C_R | 6.89757100   | -2.41598700 | 3.84938500 H  |
| C-C_R | 5.60218000   | -0.46798700 | 1.08737600 H  |
| C-C_R | 7.95503200   | -0.91579800 | 1.54221100 H  |
| H-H_  | 7.68593500   | -1.72465500 | 4.12414000 H  |
| C-C_R | 5.79102000   | -0.05538800 | -0.23720200 H |
| C-C_R | 4.39445700   | -0.14484600 | 1.71879000 H  |
| C-C_R | 8.87149500   | -1.94880400 | 1.33169900 H  |
| C-C_R | 8.40749300   | 0.40469100  | 1.56247700 H  |
| H-H_  | 6.70197400   | -0.33018300 | -0.75413600 H |
| C-C_R | 4.82067000   | 0.67521500  | -0.89736300 H |
| H-H_  | 4.22330700   | -0.46033500 | 2.74069500 H  |
| C-C_R | 3.42743900   | 0.57843300  | 1.05082400 H  |
| C-C_R | 10.21764600  | -1.66133300 | 1.15634500 H  |

|       |             |             |               |
|-------|-------------|-------------|---------------|
| H-H_  | 8.52041900  | -2.97398500 | 1.31267400 H  |
| H-H_  | 7.70055800  | 1.20776500  | 1.73738900 H  |
| C-C_R | 9.75464300  | 0.68241800  | 1.38363200 H  |
| C-C_R | 3.62550300  | 1.03145900  | -0.26043800 H |
| H-H_  | 4.98950700  | 0.94057200  | -1.93264000 H |
| H-H_  | 2.48999600  | 0.80865000  | 1.54176700 H  |
| H-H_  | 10.91786500 | -2.47261100 | 0.98907200 H  |
| C-C_R | 10.66807300 | -0.34609900 | 1.18310000 H  |
| H-H_  | 10.09191500 | 1.71041300  | 1.43117900 H  |
| C-C_R | 2.52957100  | 1.76570700  | -0.91898700 H |
| H-H_  | 11.72159400 | -0.12541100 | 1.05787600 H  |
| N-N_R | 1.32787800  | 1.51108900  | -0.45073000 H |
| C-C_R | 2.68377800  | 2.69240300  | -2.03286800 H |
| C-C_R | 0.24884500  | 2.02113000  | -1.06675300 H |
| N-N_R | 1.62300600  | 3.08727600  | -2.70411000 H |
| C-C_R | 3.96244000  | 3.25659300  | -2.49614400 H |
| C-C_R | 0.39979500  | 2.74246800  | -2.26841500 H |
| C-C_R | -1.04770000 | 1.79086300  | -0.53185100 H |
| C-C_R | 5.03185000  | 3.58040100  | -1.65271000 H |
| C-C_R | 4.10361100  | 3.53705600  | -3.85880200 H |
| C-C_R | -0.76297800 | 3.16050000  | -2.96434600 H |
| C-C_R | -2.17760400 | 2.26945700  | -1.19231700 H |
| C-C_R | -1.14698800 | 1.01979800  | 0.66625500 H  |
| C-C_R | 6.20778900  | 4.10017200  | -2.16128700 H |
| H-H_  | 4.94425300  | 3.43924100  | -0.58230100 H |
| H-H_  | 3.25939500  | 3.34862200  | -4.50694700 H |
| C-C_R | 5.28321300  | 4.02492000  | -4.38064600 H |
| C-C_R | -2.01157200 | 2.93641200  | -2.42358100 H |
| C-C_R | -0.64846900 | 3.83934400  | -4.21424800 H |
| N-N_R | -1.23687900 | 0.38747500  | 1.63104900 H  |
| H-H_  | 7.01626500  | 4.35574700  | -1.48839800 H |
| C-C_R | 6.37185100  | 4.29621100  | -3.54088200 H |
| H-H_  | 5.37626900  | 4.18448200  | -5.44744300 H |
| H-H_  | -2.88379200 | 3.29842900  | -2.95136300 H |
| N-N_R | -0.61348000 | 4.39167900  | -5.22968900 H |
| N-N_R | 7.57788400  | 4.75852600  | -4.07205100 H |
| C-C_R | 8.82086300  | 4.38522000  | -3.51307000 H |
| C-C_R | 7.56195500  | 5.58000100  | -5.23020100 H |
| C-C_R | 9.02589000  | 3.11073900  | -2.97754800 H |
| C-C_R | 9.88454200  | 5.28957400  | -3.52267300 H |
| C-C_R | 8.41733400  | 5.31137200  | -6.29919300 H |
| C-C_R | 6.69800800  | 6.67384300  | -5.30185400 H |
| H-H_  | 8.21665000  | 2.39042000  | -2.97838000 H |
| C-C_R | 10.26456500 | 2.76518900  | -2.45381300 H |

|       |              |            |               |
|-------|--------------|------------|---------------|
| H-H_  | 9.73576600   | 6.26841900 | -3.94884500 H |
| C-C_R | 11.12341500  | 4.93113100 | -3.01804400 H |
| H-H_  | 9.08833500   | 4.46186700 | -6.24456900 H |
| C-C_R | 8.41766900   | 6.13799400 | -7.41373900 H |
| H-H_  | 6.04603900   | 6.89198800 | -4.46411500 H |
| C-C_R | 6.68431000   | 7.47770800 | -6.43279700 H |
| H-H_  | 10.40459400  | 1.77329200 | -2.03767600 H |
| C-C_R | 11.32085900  | 3.66805500 | -2.47685700 H |
| H-H_  | 11.93586300  | 5.64910200 | -3.04464500 H |
| C-C_R | 7.54642500   | 7.21844800 | -7.49164100 H |
| H-H_  | 9.09324700   | 5.92363300 | -8.23457800 H |
| H-H_  | 6.01170300   | 8.32698100 | -6.47570600 H |
| H-H_  | 12.29092200  | 3.39587800 | -2.08287400 H |
| H-H_  | 7.54028400   | 7.85304500 | -8.36957400 H |
| C-C_R | -12.67598000 | 5.53322600 | 5.43982300 H  |
| H-H_  | -12.03256400 | 6.37690300 | 5.66267600 H  |
| C-C_R | -14.38977200 | 3.98777600 | 6.09728200 H  |
| H-H_  | -15.08098300 | 3.60623100 | 6.84092700 H  |
| C-C_R | -13.55700400 | 5.05756700 | 6.40386200 H  |
| H-H_  | -13.59735300 | 5.51980000 | 7.38302100 H  |
| C-C_R | -12.63098900 | 4.95454700 | 4.17953800 H  |
| C-C_R | -13.45579800 | 3.86953100 | 3.87704200 H  |
| H-H_  | -11.96205200 | 5.34224300 | 3.42030600 H  |
| N-N_R | -13.41489100 | 3.27382400 | 2.58952400 H  |
| C-C_R | -14.33366000 | 3.38593700 | 4.84797900 H  |
| C-C_R | -12.19372000 | 2.96855300 | 1.99080600 H  |
| C-C_R | -14.63691200 | 2.94149600 | 1.95744700 H  |
| H-H_  | -14.97608900 | 2.54478600 | 4.61419800 H  |
| C-C_R | -12.04341800 | 2.99212700 | 0.59577600 H  |
| C-C_R | -11.07549100 | 2.63950700 | 2.76953500 H  |
| C-C_R | -15.68789600 | 3.85853400 | 1.95876400 H  |
| C-C_R | -14.82367900 | 1.69201200 | 1.36299300 H  |
| H-H_  | -12.87933900 | 3.29079600 | -0.02394200 H |
| C-C_R | -10.84203000 | 2.64777400 | 0.00470300 H  |
| H-H_  | -11.16201600 | 2.62191000 | 3.84840000 H  |
| C-C_R | -9.87474800  | 2.32507500 | 2.16992500 H  |
| C-C_R | -16.91042600 | 3.52823400 | 1.39474600 H  |
| H-H_  | -15.53503600 | 4.82407800 | 2.41716500 H  |
| H-H_  | -14.01476600 | 0.97060200 | 1.36958600 H  |
| C-C_R | -16.04372500 | 1.37538600 | 0.78055300 H  |
| C-C_R | -9.73442800  | 2.27904800 | 0.77840500 H  |
| H-H_  | -10.76425100 | 2.69003000 | -1.07455700 H |
| H-H_  | -9.00765400  | 2.10134400 | 2.77535200 H  |
| H-H_  | -17.71947800 | 4.25009000 | 1.41489200 H  |

|       |              |             |               |
|-------|--------------|-------------|---------------|
| C-C_R | -17.09467400 | 2.28515400  | 0.80190900 H  |
| H-H_  | -16.17769500 | 0.40091700  | 0.32399900 H  |
| C-C_R | -8.41514100  | 1.92810800  | 0.22703500 H  |
| H-H_  | -18.05235600 | 2.02817200  | 0.36642000 H  |
| N-N_R | -7.38955000  | 2.27257300  | 0.97833600 H  |
| C-C_R | -8.17926300  | 1.27677600  | -1.05446700 H |
| C-C_R | -6.14240200  | 2.14341900  | 0.49784900 H  |
| N-N_R | -6.96015300  | 1.22395300  | -1.54195500 H |
| C-C_R | -9.20511700  | 0.63005700  | -1.89431100 H |
| C-C_R | -5.92932900  | 1.69125400  | -0.81947600 H |
| C-C_R | -5.02112200  | 2.53842700  | 1.27180600 H  |
| C-C_R | -10.36203000 | 0.02159500  | -1.39433300 H |
| C-C_R | -8.96571300  | 0.54637000  | -3.27198600 H |
| C-C_R | -4.62174900  | 1.69685600  | -1.37550300 H |
| C-C_R | -3.76101900  | 2.54416900  | 0.71198200 H  |
| C-C_R | -5.19731000  | 2.96773500  | 2.62099900 H  |
| C-C_R | -11.26018400 | -0.60302400 | -2.24108900 H |
| H-H_  | -10.55660400 | 0.00742200  | -0.32968300 H |
| H-H_  | -8.05523500  | 0.97957800  | -3.66718300 H |
| C-C_R | -9.86306200  | -0.06515500 | -4.12302900 H |
| C-C_R | -3.53864700  | 2.14477300  | -0.62241700 H |
| C-C_R | -4.46493200  | 1.19937700  | -2.70519000 H |
| H-H_  | -2.92516200  | 2.88605000  | 1.30716800 H  |
| N-N_R | -5.28887800  | 3.32158200  | 3.71810800 H  |
| H-H_  | -12.14436400 | -1.07701300 | -1.83410900 H |
| C-C_R | -11.03296900 | -0.64612400 | -3.62111600 H |
| H-H_  | -9.66562200  | -0.09244600 | -5.18768600 H |
| N-N_R | -4.33448900  | 0.79205400  | -3.78025600 H |
| N-N_R | -11.94341700 | -1.27537700 | -4.48149700 H |
| C-C_R | -13.33283400 | -1.13914900 | -4.26341400 H |
| C-C_R | -11.46999800 | -2.06721700 | -5.55086200 H |
| C-C_R | -13.87528800 | 0.10704900  | -3.94098300 H |
| C-C_R | -14.18330100 | -2.24121500 | -4.38190500 H |
| C-C_R | -12.13628000 | -2.08168800 | -6.77820300 H |
| C-C_R | -10.33054900 | -2.85918800 | -5.38986600 H |
| H-H_  | -13.22283500 | 0.96902800  | -3.86163800 H |
| C-C_R | -15.24184500 | 0.24312800  | -3.74250300 H |
| H-H_  | -13.76658300 | -3.21091100 | -4.62763400 H |
| C-C_R | -15.55032000 | -2.09128600 | -4.19745700 H |
| H-H_  | -13.01706500 | -1.46558800 | -6.91548300 H |
| C-C_R | -11.67455500 | -2.88489700 | -7.81156300 H |
| H-H_  | -9.80680800  | -2.85321600 | -4.44168900 H |
| C-C_R | -9.86996600  | -3.64784100 | -6.43286500 H |
| H-H_  | -15.64950300 | 1.21887800  | -3.50695500 H |

|       |              |             |               |
|-------|--------------|-------------|---------------|
| C-C_R | -16.08861800 | -0.85064900 | -3.87564500 H |
| H-H_  | -16.19778300 | -2.95491600 | -4.29701600 H |
| C-C_R | -10.54124500 | -3.67135000 | -7.64884900 H |
| H-H_  | -12.20554300 | -2.89216800 | -8.75736900 H |
| H-H_  | -8.98742600  | -4.25933900 | -6.28307000 H |
| H-H_  | -17.15730400 | -0.73567100 | -3.73604300 H |
| H-H_  | -10.18525000 | -4.29338100 | -8.46134600 H |
| C-C_R | 34.64431400  | -2.67592000 | 3.46706100 L  |
| H-H_  | 33.73390700  | -3.26169400 | 3.41065200 L  |
| C-C_R | 36.65587900  | -2.04589800 | 4.62485800 L  |
| H-H_  | 37.31034500  | -2.12398900 | 5.48529100 L  |
| C-C_R | 35.48605400  | -2.79737500 | 4.56714700 L  |
| H-H_  | 35.23149900  | -3.47186200 | 5.37711000 L  |
| C-C_R | 34.96392000  | -1.81783200 | 2.42924600 L  |
| C-C_R | 36.13844000  | -1.05733600 | 2.48885800 L  |
| H-H_  | 34.31628800  | -1.73511300 | 1.56522300 L  |
| N-N_R | 36.46125700  | -0.17710800 | 1.44223800 L  |
| C-C_R | 36.98417200  | -1.17768500 | 3.59908600 L  |
| C-C_R | 35.44832600  | 0.56116600  | 0.81068200 L  |
| C-C_R | 37.79571600  | -0.02654800 | 1.03108100 L  |
| H-H_  | 37.88195200  | -0.57412500 | 3.65438400 L  |
| C-C_R | 35.47592200  | 0.75199000  | -0.57527700 L |
| C-C_R | 34.39494000  | 1.10380900  | 1.55864000 L  |
| C-C_R | 38.64848200  | -1.13493800 | 0.97322300 L  |
| C-C_R | 38.28124000  | 1.23702900  | 0.67320700 L  |
| H-H_  | 36.26271000  | 0.29235100  | -1.16324500 L |
| C-C_R | 34.48606500  | 1.48963100  | -1.19297000 L |
| H-H_  | 34.36984500  | 0.96034500  | 2.63177800 L  |
| C-C_R | 33.40539700  | 1.83153600  | 0.92987500 L  |
| C-C_R | 39.96359300  | -0.97392300 | 0.57130400 L  |
| H-H_  | 38.26696400  | -2.11615100 | 1.23176100 L  |
| H-H_  | 37.62524200  | 2.09576600  | 0.73032900 L  |
| C-C_R | 39.59684500  | 1.38343800  | 0.26677000 L  |
| C-C_R | 33.44569700  | 2.06041800  | -0.45024600 L |
| H-H_  | 34.50398500  | 1.60895800  | -2.26854100 L |
| H-H_  | 32.57839300  | 2.23746300  | 1.49850900 L  |
| H-H_  | 40.61388900  | -1.84074700 | 0.52243600 L  |
| C-C_R | 40.44441100  | 0.28122100  | 0.21561000 L  |
| H-H_  | 39.96324100  | 2.36714100  | -0.00147000 L |
| C-C_R | 32.34218300  | 2.81339400  | -1.08876800 L |
| H-H_  | 41.47504600  | 0.40026700  | -0.09834800 L |
| N-N_R | 31.15027500  | 2.57216400  | -0.56015000 L |
| C-C_R | 32.48941600  | 3.67328400  | -2.20171200 L |
| C-C_R | 30.06556700  | 3.07438400  | -1.16019900 L |

|       |             |            |               |
|-------|-------------|------------|---------------|
| N-N_R | 31.40812000 | 4.10169800 | -2.85560300 L |
| C-C_R | 33.77481300 | 4.19267800 | -2.70437100 L |
| C-C_R | 30.20738500 | 3.79330700 | -2.38107200 L |
| C-C_R | 28.77411700 | 2.84914400 | -0.60518500 L |
| C-C_R | 34.83873600 | 4.51182900 | -1.85298400 L |
| C-C_R | 33.92215400 | 4.45211800 | -4.07197700 L |
| C-C_R | 29.02439700 | 4.20804700 | -3.07292100 L |
| C-C_R | 27.62261100 | 3.30953300 | -1.28048100 L |
| C-C_R | 28.70167000 | 2.08988200 | 0.59100400 L  |
| C-C_R | 36.01913200 | 5.02995400 | -2.34907900 L |
| H-H_  | 34.72797700 | 4.38581400 | -0.78254000 L |
| H-H_  | 33.09004800 | 4.24401600 | -4.73247500 L |
| C-C_R | 35.10390300 | 4.95926700 | -4.57825500 L |
| C-C_R | 27.78400400 | 3.95282800 | -2.52231200 L |
| C-C_R | 29.14357400 | 4.91574800 | -4.29983000 L |
| N-N_R | 28.65283700 | 1.46934400 | 1.57107800 L  |
| H-H_  | 36.82523900 | 5.29626200 | -1.67640900 L |
| C-C_R | 36.17292700 | 5.24702300 | -3.72308700 L |
| H-H_  | 35.20906400 | 5.13176800 | -5.64288600 L |
| H-H_  | 26.90581300 | 4.30548100 | -3.04653400 L |
| N-N_R | 29.22582600 | 5.49429200 | -5.30051100 L |
| N-N_R | 37.37838200 | 5.76305900 | -4.22960800 L |
| C-C_R | 38.60552400 | 5.30127700 | -3.72080200 L |
| C-C_R | 37.35478600 | 6.73802900 | -5.24722500 L |
| C-C_R | 38.77945500 | 3.94435300 | -3.42794200 L |
| C-C_R | 39.66610600 | 6.18572600 | -3.50600000 L |
| C-C_R | 38.28884600 | 6.69904500 | -6.28652400 L |
| C-C_R | 36.39117700 | 7.75019500 | -5.22971100 L |
| H-H_  | 37.96440600 | 3.25370100 | -3.60630000 L |
| C-C_R | 39.99033200 | 3.48910500 | -2.92942000 L |
| H-H_  | 39.53095000 | 7.23841900 | -3.72277600 L |
| C-C_R | 40.87435800 | 5.71905700 | -3.01466600 L |
| H-H_  | 39.02770400 | 5.90611100 | -6.31027100 L |
| C-C_R | 38.25973300 | 7.66161900 | -7.28326400 L |
| H-H_  | 35.67067900 | 7.78717500 | -4.42217300 L |
| C-C_R | 36.36346700 | 8.70011100 | -6.23982200 L |
| H-H_  | 40.11261100 | 2.43191000 | -2.72207300 L |
| C-C_R | 41.04604500 | 4.36912500 | -2.72208000 L |
| H-H_  | 41.68706900 | 6.41823300 | -2.85150200 L |
| C-C_R | 37.29741900 | 8.66507600 | -7.26866200 L |
| H-H_  | 38.98650500 | 7.61727500 | -8.08556600 L |
| H-H_  | 35.61012100 | 9.47819800 | -6.21348800 L |
| H-H_  | 41.99511700 | 4.00967800 | -2.34275600 L |
| H-H_  | 37.27340400 | 9.41088100 | -8.05346000 L |

|       |             |            |               |
|-------|-------------|------------|---------------|
| C-C_R | 17.25660600 | 6.74088300 | 5.33073200 L  |
| H-H_  | 17.95543000 | 7.55136500 | 5.50805300 L  |
| C-C_R | 15.44057000 | 5.35407400 | 6.06032200 L  |
| H-H_  | 14.72028300 | 5.06344200 | 6.81612700 L  |
| C-C_R | 16.33288100 | 6.39030700 | 6.30785300 L  |
| H-H_  | 16.31015800 | 6.91873800 | 7.25493700 L  |
| C-C_R | 17.28638700 | 6.07425600 | 4.11608500 L  |
| C-C_R | 16.39650400 | 5.02585600 | 3.87030500 L  |
| H-H_  | 17.99986800 | 6.35850300 | 3.35162600 L  |
| N-N_R | 16.42898200 | 4.33786300 | 2.63937400 L  |
| C-C_R | 15.47304100 | 4.66839600 | 4.85576600 L  |
| C-C_R | 17.65935800 | 4.01279700 | 2.04533400 L  |
| C-C_R | 15.22380600 | 3.95512900 | 2.01658000 L  |
| H-H_  | 14.78747900 | 3.85002900 | 4.67152000 L  |
| C-C_R | 17.81700900 | 4.08865900 | 0.65680400 L  |
| C-C_R | 18.75001200 | 3.61303000 | 2.82475100 L  |
| C-C_R | 14.13086700 | 4.82711800 | 1.99438100 L  |
| C-C_R | 15.10362500 | 2.69882900 | 1.41888800 L  |
| H-H_  | 16.99190200 | 4.43294100 | 0.04593900 L  |
| C-C_R | 19.01905600 | 3.74408100 | 0.06697100 L  |
| H-H_  | 18.64391800 | 3.55496300 | 3.90113600 L  |
| C-C_R | 19.95425400 | 3.29124400 | 2.22920200 L  |
| C-C_R | 12.94387900 | 4.44087500 | 1.39222200 L  |
| H-H_  | 14.22327600 | 5.80536800 | 2.45010400 L  |
| H-H_  | 15.94484400 | 2.01634600 | 1.44102100 L  |
| C-C_R | 13.91616500 | 2.32553700 | 0.80800900 L  |
| C-C_R | 20.10739800 | 3.32384300 | 0.83927400 L  |
| H-H_  | 19.12022300 | 3.82895400 | -1.00763600 L |
| H-H_  | 20.80052600 | 3.00017100 | 2.83836000 L  |
| H-H_  | 12.10652200 | 5.12833800 | 1.38163400 L  |
| C-C_R | 12.82744500 | 3.19187700 | 0.79324600 L  |
| H-H_  | 13.83985500 | 1.34475600 | 0.35293000 L  |
| C-C_R | 21.42072700 | 3.00203500 | 0.25107700 L  |
| H-H_  | 11.89789200 | 2.89453900 | 0.32224000 L  |
| N-N_R | 22.46704800 | 3.35736000 | 0.97962400 L  |
| C-C_R | 21.61560700 | 2.38800900 | -1.02857500 L |
| C-C_R | 23.68838200 | 3.24096600 | 0.45632500 L  |
| N-N_R | 22.81484700 | 2.35824600 | -1.58003600 L |
| C-C_R | 20.55406700 | 1.71737400 | -1.80648900 L |
| C-C_R | 23.86667000 | 2.81231200 | -0.88059100 L |
| C-C_R | 24.83998700 | 3.59296400 | 1.22307200 L  |
| C-C_R | 19.53166400 | 0.98010000 | -1.20018900 L |
| C-C_R | 20.61033400 | 1.74424200 | -3.20242500 L |
| C-C_R | 25.16305700 | 2.80631800 | -1.46440400 L |



|       |              |             |               |
|-------|--------------|-------------|---------------|
| C-C_R | 26.08841100  | 3.55661900  | 0.64448700 L  |
| C-C_R | 24.68391600  | 4.01687200  | 2.57443900 L  |
| C-C_R | 18.58490000  | 0.31946300  | -1.95870000 L |
| H-H_  | 19.49138200  | 0.89991400  | -0.12146300 L |
| H-H_  | 21.41883900  | 2.28297900  | -3.68098900 L |
| C-C_R | 19.65379600  | 1.10519200  | -3.96871100 L |
| C-C_R | 26.28311000  | 3.20166000  | -0.70909200 L |
| C-C_R | 25.28519300  | 2.32382800  | -2.79543500 L |
| H-H_  | 26.94416800  | 3.85624200  | 1.23481600 L  |
| N-N_R | 24.58281600  | 4.36493400  | 3.67439500 L  |
| H-H_  | 17.81298200  | -0.26392200 | -1.47389300 L |
| C-C_R | 18.62074600  | 0.38694400  | -3.35536400 L |
| H-H_  | 19.69793600  | 1.16052500  | -5.04900700 L |
| N-N_R | 25.38602100  | 1.92703100  | -3.88129300 L |
| N-N_R | 17.64048300  | -0.26068700 | -4.12439200 L |
| C-C_R | 16.29806500  | -0.26671400 | -3.69332000 L |
| C-C_R | 17.98799200  | -0.88513400 | -5.33972900 L |
| C-C_R | 15.72748200  | 0.88073300  | -3.13863600 L |
| C-C_R | 15.52020200  | -1.41988400 | -3.82188800 L |
| C-C_R | 17.15552800  | -0.77277100 | -6.45588700 L |
| C-C_R | 19.17097300  | -1.62242500 | -5.44299700 L |
| H-H_  | 16.32598300  | 1.77877300  | -3.04417800 L |
| C-C_R | 14.40716500  | 0.87141800  | -2.71708800 L |
| H-H_  | 15.96026800  | -2.31355100 | -4.24715500 L |
| C-C_R | 14.19543600  | -1.41717700 | -3.41114100 L |
| H-H_  | 16.24212500  | -0.19411500 | -6.38267000 L |
| C-C_R | 17.49802100  | -1.39487100 | -7.64682400 L |
| H-H_  | 19.81699500  | -1.71635300 | -4.57810500 L |
| C-C_R | 19.51278000  | -2.22550600 | -6.64303500 L |
| H-H_  | 13.97984600  | 1.77259600  | -2.29213600 L |
| C-C_R | 13.63108000  | -0.27589600 | -2.85310800 L |
| H-H_  | 13.60403900  | -2.31892400 | -3.51607700 L |
| C-C_R | 18.67961900  | -2.12115900 | -7.74995900 L |
| H-H_  | 16.84291100  | -1.29799300 | -8.50431900 L |
| H-H_  | 20.43481800  | -2.79273800 | -6.70709100 L |
| H-H_  | 12.59637900  | -0.27712000 | -2.53205400 L |
| H-H_  | 18.94777300  | -2.59909800 | -8.68536500 L |
| C-C_R | -25.19033500 | -3.93847700 | -4.26191500 L |
| H-H_  | -26.09974200 | -4.52421700 | -4.31832600 L |
| C-C_R | -23.17776400 | -3.30852200 | -3.10312600 L |
| H-H_  | -22.52329800 | -3.38661300 | -2.24269200 L |
| C-C_R | -24.34759500 | -4.05989700 | -3.16183100 L |
| H-H_  | -24.60315000 | -4.73441900 | -2.35186600 L |
| C-C_R | -24.87072800 | -3.08038900 | -5.29973000 L |

|       |              |             |                |
|-------|--------------|-------------|----------------|
| C-C_R | -23.69620800 | -2.31989300 | -5.24011800 L  |
| H-H_  | -25.51736100 | -2.99763500 | -6.16375500 L  |
| N-N_R | -23.37239200 | -1.43963000 | -6.28674100 L  |
| C-C_R | -22.85047600 | -2.44024200 | -4.12989000 L  |
| C-C_R | -24.38531700 | -0.70145800 | -6.91730200 L  |
| C-C_R | -22.03793300 | -1.28907000 | -6.69789700 L  |
| H-H_  | -21.95169700 | -1.83664800 | -4.07459400 L  |
| C-C_R | -24.35872700 | -0.51056700 | -8.30425300 L  |
| C-C_R | -25.43870900 | -0.15871400 | -6.17033800 L  |
| C-C_R | -21.18616000 | -2.39759700 | -6.75475800 L  |
| C-C_R | -21.55340900 | -0.02552800 | -7.05576800 L  |
| H-H_  | -23.57093900 | -0.97017100 | -8.89222400 L  |
| C-C_R | -25.34857700 | 0.22697200  | -8.92095100 L  |
| H-H_  | -25.46479700 | -0.30231400 | -5.09620300 L  |
| C-C_R | -26.42825200 | 0.56901300  | -6.79910300 L  |
| C-C_R | -19.87005600 | -2.23644500 | -7.15767400 L  |
| H-H_  | -21.56668500 | -3.37867300 | -6.49721700 L  |
| H-H_  | -22.20840000 | 0.83314200  | -6.99765500 L  |
| C-C_R | -20.23680400 | 0.12091600  | -7.46220900 L  |
| C-C_R | -26.38894500 | 0.79775900  | -8.17822700 L  |
| H-H_  | -25.33066300 | 0.34640100  | -9.99751700 L  |
| H-H_  | -27.25525600 | 0.97494100  | -6.23047000 L  |
| H-H_  | -19.22075900 | -3.10330400 | -7.20654000 L  |
| C-C_R | -19.38923100 | -0.98140400 | -7.51237400 L  |
| H-H_  | -19.87040200 | 1.10451600  | -7.72945400 L  |
| C-C_R | -27.49146600 | 1.55087200  | -8.81774700 L  |
| H-H_  | -18.35959600 | -0.86239200 | -7.82632900 L  |
| N-N_R | -28.68336800 | 1.30953900  | -8.28813400 L  |
| C-C_R | -27.34423300 | 2.41076200  | -9.93069000 L  |
| C-C_R | -29.76808200 | 1.81186200  | -8.88917800 L  |
| N-N_R | -28.42552900 | 2.83917600  | -10.58458100 L |
| C-C_R | -26.05883600 | 2.93015600  | -10.43335000 L |
| C-C_R | -29.62626400 | 2.53078500  | -10.11005100 L |
| C-C_R | -31.05953200 | 1.58662200  | -8.33416300 L  |
| C-C_R | -24.99491300 | 3.24930700  | -9.58196300 L  |
| C-C_R | -25.91149500 | 3.18959600  | -11.80095600 L |
| C-C_R | -30.81025100 | 2.94549000  | -10.80189700 L |
| C-C_R | -32.21203700 | 2.04697600  | -9.00945700 L  |
| C-C_R | -31.13197200 | 0.82725800  | -7.13698000 L  |
| C-C_R | -23.81451700 | 3.76743200  | -10.07805800 L |
| H-H_  | -25.10667100 | 3.12325700  | -8.51151600 L  |
| H-H_  | -26.74460100 | 2.98145900  | -12.46145100 L |
| C-C_R | -24.72974600 | 3.69674500  | -12.30723400 L |
| C-C_R | -32.04964500 | 2.69030600  | -10.25129000 L |

|       |              |            |                |
|-------|--------------|------------|----------------|
| C-C_R | -30.69107400 | 3.65319100 | -12.02880600 L |
| N-N_R | -31.18181100 | 0.20678700 | -6.15789800 L  |
| H-H_  | -23.00841000 | 4.03374000 | -9.40538800 L  |
| C-C_R | -23.66072200 | 3.98450100 | -11.45206600 L |
| H-H_  | -24.62458500 | 3.86924500 | -13.37186400 L |
| H-H_  | -32.92882900 | 3.04282200 | -10.77451500 L |
| N-N_R | -30.60782300 | 4.23177000 | -13.02948900 L |
| N-N_R | -22.45626600 | 4.50050200 | -11.95858300 L |
| C-C_R | -21.22912500 | 4.03872000 | -11.44977700 L |
| C-C_R | -22.47886300 | 5.47550700 | -12.97620400 L |
| C-C_R | -21.05419400 | 2.68183100 | -11.15692000 L |
| C-C_R | -20.16754300 | 4.92320400 | -11.23497900 L |
| C-C_R | -21.54479700 | 5.43642100 | -14.01450800 L |
| C-C_R | -23.44247200 | 6.48767300 | -12.95868900 L |
| H-H_  | -21.86923700 | 1.99107700 | -11.33428400 L |
| C-C_R | -19.84331700 | 2.22658300 | -10.65839900 L |
| H-H_  | -20.30269900 | 5.97589700 | -11.45175400 L |
| C-C_R | -18.95929100 | 4.45653500 | -10.74364500 L |
| H-H_  | -20.80594500 | 4.64358900 | -14.03924900 L |
| C-C_R | -21.57391000 | 6.39899400 | -15.01124800 L |
| H-H_  | -24.16297000 | 6.52465300 | -12.15115200 L |
| C-C_R | -23.47017500 | 7.43748600 | -13.96780600 L |
| H-H_  | -19.72103200 | 1.16928600 | -10.45005700 L |
| C-C_R | -18.78760400 | 3.10660300 | -10.45105800 L |
| H-H_  | -18.14657400 | 5.15560800 | -10.57948600 L |
| C-C_R | -22.53622400 | 7.40245200 | -14.99664600 L |
| H-H_  | -20.84713800 | 6.35465000 | -15.81354900 L |
| H-H_  | -24.22352800 | 8.21567600 | -13.94246600 L |
| H-H_  | -17.83853200 | 2.74715500 | -10.07173500 L |
| H-H_  | -22.56024500 | 8.14835900 | -15.78243900 L |
| C-C_R | -42.57704300 | 5.47836000 | -2.39824700 L  |
| H-H_  | -41.87821900 | 6.28884300 | -2.22092500 L  |
| C-C_R | -44.39307900 | 4.09155200 | -1.66865700 L  |
| H-H_  | -45.11336600 | 3.80092000 | -0.91285200 L  |
| C-C_R | -43.50076800 | 5.12778500 | -1.42112500 L  |
| H-H_  | -43.52349100 | 5.65621500 | -0.47404200 L  |
| C-C_R | -42.54726200 | 4.81173400 | -3.61289300 L  |
| C-C_R | -43.43714500 | 3.76333300 | -3.85867300 L  |
| H-H_  | -41.83378100 | 5.09598100 | -4.37735300 L  |
| N-N_R | -43.40466700 | 3.07534000 | -5.08960500 L  |
| C-C_R | -44.36060800 | 3.40587400 | -2.87321300 L  |
| C-C_R | -42.17429100 | 2.75027400 | -5.68364500 L  |
| C-C_R | -44.60984400 | 2.69260700 | -5.71239900 L  |
| H-H_  | -45.04617000 | 2.58750700 | -3.05745900 L  |

|       |              |             |                |
|-------|--------------|-------------|----------------|
| C-C_R | -42.01664000 | 2.82613700  | -7.07217400 L  |
| C-C_R | -41.08363100 | 2.35040600  | -4.90323300 L  |
| C-C_R | -45.70278200 | 3.56459600  | -5.73459800 L  |
| C-C_R | -44.73002400 | 1.43630600  | -6.31009100 L  |
| H-H_  | -42.84174700 | 3.17041800  | -7.68304000 L  |
| C-C_R | -40.81459300 | 2.48155800  | -7.66200700 L  |
| H-H_  | -41.18973100 | 2.29244000  | -3.82784200 L  |
| C-C_R | -39.87939500 | 2.02872200  | -5.49977700 L  |
| C-C_R | -46.88977000 | 3.17835300  | -6.33675600 L  |
| H-H_  | -45.61037300 | 4.54284600  | -5.27887500 L  |
| H-H_  | -43.88880500 | 0.75382300  | -6.28795800 L  |
| C-C_R | -45.91748400 | 1.06301500  | -6.92096900 L  |
| C-C_R | -39.72625100 | 2.06132100  | -6.88970400 L  |
| H-H_  | -40.71342000 | 2.56633000  | -8.73562000 L  |
| H-H_  | -39.03312300 | 1.73764900  | -4.89061900 L  |
| H-H_  | -47.72812700 | 3.86578100  | -6.34734200 L  |
| C-C_R | -47.00620400 | 1.92935400  | -6.93573200 L  |
| H-H_  | -45.99479300 | 0.08219900  | -7.37604500 L  |
| C-C_R | -38.41392100 | 1.73947800  | -7.47789900 L  |
| H-H_  | -47.93575000 | 1.63191400  | -7.40574400 L  |
| N-N_R | -37.36660100 | 2.09483800  | -6.74935400 L  |
| C-C_R | -38.21804200 | 1.12548700  | -8.75755300 L  |
| C-C_R | -36.14626000 | 1.97830700  | -7.27165600 L  |
| N-N_R | -37.01880200 | 1.09572400  | -9.30901400 L  |
| C-C_R | -39.27958200 | 0.45485200  | -9.53546700 L  |
| C-C_R | -35.96797800 | 1.54975500  | -8.60956700 L  |
| C-C_R | -34.99366200 | 2.33044200  | -6.50590700 L  |
| C-C_R | -40.30198500 | -0.28242200 | -8.92916700 L  |
| C-C_R | -39.22331500 | 0.48172000  | -10.93140300 L |
| C-C_R | -34.67059200 | 1.54379600  | -9.19338300 L  |
| C-C_R | -33.74523800 | 2.29409600  | -7.08449100 L  |
| C-C_R | -35.14972700 | 2.75424800  | -5.15354500 L  |
| C-C_R | -41.24874900 | -0.94305900 | -9.68767900 L  |
| H-H_  | -40.34226700 | -0.36260800 | -7.85044200 L  |
| H-H_  | -38.41481000 | 1.02045700  | -11.40996700 L |
| C-C_R | -40.17985300 | -0.15733100 | -11.69769000 L |
| C-C_R | -33.55053300 | 1.93903500  | -8.43707600 L  |
| C-C_R | -34.54945500 | 1.06127100  | -10.52441100 L |
| H-H_  | -32.88948100 | 2.59371900  | -6.49416300 L  |
| N-N_R | -35.25083300 | 3.10241100  | -4.05458300 L  |
| H-H_  | -42.02166600 | -1.52647900 | -9.20286900 L  |
| C-C_R | -41.21290300 | -0.87557800 | -11.08434300 L |
| H-H_  | -40.13571300 | -0.10199700 | -12.77798600 L |
| N-N_R | -34.44862700 | 0.66447400  | -11.61026900 L |

|       |              |             |                |
|-------|--------------|-------------|----------------|
| N-N_R | -42.19316600 | -1.52320900 | -11.85337100 L |
| C-C_R | -43.53558400 | -1.52923600 | -11.42229800 L |
| C-C_R | -41.84565700 | -2.14765600 | -13.06870700 L |
| C-C_R | -44.10616700 | -0.38178900 | -10.86761400 L |
| C-C_R | -44.31344700 | -2.68240700 | -11.55086700 L |
| C-C_R | -42.67812100 | -2.03529300 | -14.18486500 L |
| C-C_R | -40.66267000 | -2.88504900 | -13.17098000 L |
| H-H_  | -43.50766600 | 0.51625000  | -10.77315600 L |
| C-C_R | -45.42748400 | -0.39113900 | -10.44606400 L |
| H-H_  | -43.87337500 | -3.57617600 | -11.97513800 L |
| C-C_R | -45.63820600 | -2.67980200 | -11.13912500 L |
| H-H_  | -43.59152400 | -1.45663700 | -14.11164900 L |
| C-C_R | -42.33562800 | -2.65739400 | -15.37580200 L |
| H-H_  | -40.01765400 | -2.97891000 | -12.30708000 L |
| C-C_R | -40.32086900 | -3.48802900 | -14.37201300 L |
| H-H_  | -45.85380300 | 0.51007400  | -10.02111400 L |
| C-C_R | -46.20256900 | -1.53841800 | -10.58208700 L |
| H-H_  | -46.22961000 | -3.58144600 | -11.24505600 L |
| C-C_R | -41.15403000 | -3.38368100 | -15.47893700 L |
| H-H_  | -42.99073800 | -2.56051600 | -16.23329700 L |
| H-H_  | -39.39883100 | -4.05526000 | -14.43606900 L |
| H-H_  | -47.23727000 | -1.53964200 | -10.26103300 L |
| H-H_  | -40.88587600 | -3.86162000 | -16.41434300 L |
| C-C_R | 4.70158900   | -2.90200700 | -4.34410100 L  |
| H-H_  | 3.79218200   | -3.48774600 | -4.40051200 L  |
| C-C_R | 6.71415900   | -2.27205200 | -3.18531100 L  |
| H-H_  | 7.36862500   | -2.35014300 | -2.32487800 L  |
| C-C_R | 5.54432800   | -3.02342700 | -3.24401700 L  |
| H-H_  | 5.28877400   | -3.69794800 | -2.43405100 L  |
| C-C_R | 5.02219400   | -2.04388400 | -5.38191800 L  |
| C-C_R | 6.19671400   | -1.28338800 | -5.32230600 L  |
| H-H_  | 4.37456200   | -1.96116500 | -6.24594100 L  |
| N-N_R | 6.51953100   | -0.40316000 | -6.36892600 L  |
| C-C_R | 7.04244700   | -1.40373700 | -4.21207800 L  |
| C-C_R | 5.50660700   | 0.33501200  | -6.99948700 L  |
| C-C_R | 7.85399100   | -0.25259900 | -6.78008300 L  |
| H-H_  | 7.94022600   | -0.80017700 | -4.15678000 L  |
| C-C_R | 5.53319700   | 0.52590300  | -8.38643800 L  |
| C-C_R | 4.45321500   | 0.87775700  | -6.25252400 L  |
| C-C_R | 8.70676200   | -1.36109200 | -6.83694600 L  |
| C-C_R | 8.33851500   | 1.01094300  | -7.13795400 L  |
| H-H_  | 6.32098400   | 0.06630000  | -8.97440900 L  |
| C-C_R | 4.54434500   | 1.26347700  | -9.00313900 L  |
| H-H_  | 4.42812600   | 0.73419100  | -5.17839100 L  |

|       |             |             |                |
|-------|-------------|-------------|----------------|
| C-C_R | 3.46367100  | 1.60548400  | -6.88128900 L  |
| C-C_R | 10.02186700 | -1.19997500 | -7.23986000 L  |
| H-H_  | 8.32523800  | -2.34220300 | -6.57940300 L  |
| H-H_  | 7.68352300  | 1.86961200  | -7.07984000 L  |
| C-C_R | 9.65511900  | 1.15738600  | -7.54439400 L  |
| C-C_R | 3.50397800  | 1.83426400  | -8.26041500 L  |
| H-H_  | 4.56126000  | 1.38287100  | -10.07970200 L |
| H-H_  | 2.63666700  | 2.01141200  | -6.31265500 L  |
| H-H_  | 10.67116400 | -2.06683300 | -7.28872600 L  |
| C-C_R | 10.50269200 | 0.05506700  | -7.59455900 L  |
| H-H_  | 10.02152100 | 2.14098700  | -7.81163900 L  |
| C-C_R | 2.40045700  | 2.58734200  | -8.89993200 L  |
| H-H_  | 11.53332700 | 0.17411300  | -7.90851800 L  |
| N-N_R | 1.20855500  | 2.34601000  | -8.37032000 L  |
| C-C_R | 2.54769000  | 3.44723200  | -10.01287600 L |
| C-C_R | 0.12384100  | 2.84833200  | -8.97136300 L  |
| N-N_R | 1.46639400  | 3.87564600  | -10.66676700 L |
| C-C_R | 3.83308800  | 3.96662600  | -10.51553500 L |
| C-C_R | 0.26565900  | 3.56725500  | -10.19223600 L |
| C-C_R | -1.16760900 | 2.62309200  | -8.41634900 L  |
| C-C_R | 4.89701000  | 4.28577700  | -9.66414800 L  |
| C-C_R | 3.98042800  | 4.22606700  | -11.88314100 L |
| C-C_R | -0.91732900 | 3.98199500  | -10.88408500 L |
| C-C_R | -2.32011400 | 3.08344700  | -9.09164300 L  |
| C-C_R | -1.24004900 | 1.86372900  | -7.21916500 L  |
| C-C_R | 6.07740600  | 4.80390200  | -10.16024300 L |
| H-H_  | 4.78625200  | 4.15976200  | -8.59370400 L  |
| H-H_  | 3.14832200  | 4.01796400  | -12.54363900 L |
| C-C_R | 5.16217700  | 4.73321500  | -12.38941900 L |
| C-C_R | -2.15772100 | 3.72677600  | -10.33347600 L |
| C-C_R | -0.79915100 | 4.68966100  | -12.11099100 L |
| N-N_R | -1.28988800 | 1.24325700  | -6.24008300 L  |
| H-H_  | 6.88351300  | 5.07021100  | -9.48757300 L  |
| C-C_R | 6.23120200  | 5.02097100  | -11.53425100 L |
| H-H_  | 5.26733800  | 4.90571600  | -13.45405000 L |
| H-H_  | -3.03590700 | 4.07932700  | -10.85670300 L |
| N-N_R | -0.71590000 | 5.26824000  | -13.11167500 L |
| N-N_R | 7.43665600  | 5.53700700  | -12.04077200 L |
| C-C_R | 8.66279900  | 5.07519100  | -11.53196300 L |
| C-C_R | 7.41306000  | 6.51197700  | -13.05838900 L |
| C-C_R | 8.83772900  | 3.71830100  | -11.23910600 L |
| C-C_R | 9.72438000  | 5.95967400  | -11.31716400 L |
| C-C_R | 8.34712600  | 6.47289100  | -14.09669400 L |
| C-C_R | 6.44945100  | 7.52414300  | -13.04087500 L |

|       |              |            |                |
|-------|--------------|------------|----------------|
| H-H_  | 8.02268600   | 3.02754700 | -11.41646900 L |
| C-C_R | 10.04860700  | 3.26305300 | -10.74058400 L |
| H-H_  | 9.58922400   | 7.01236700 | -11.53394000 L |
| C-C_R | 10.93263200  | 5.49300500 | -10.82583000 L |
| H-H_  | 9.08597900   | 5.68005900 | -14.12143400 L |
| C-C_R | 8.31801400   | 7.43546500 | -15.09343300 L |
| H-H_  | 5.72895300   | 7.56112300 | -12.23333700 L |
| C-C_R | 6.42174800   | 8.47395700 | -14.04999100 L |
| H-H_  | 10.17089100  | 2.20575600 | -10.53224200 L |
| C-C_R | 11.10431900  | 4.14307300 | -10.53324400 L |
| H-H_  | 11.74534900  | 6.19207900 | -10.66167200 L |
| C-C_R | 7.35569900   | 8.43892200 | -15.07883100 L |
| H-H_  | 9.04478500   | 7.39112100 | -15.89573500 L |
| H-H_  | 5.66839600   | 9.25214600 | -14.02465200 L |
| H-H_  | 12.05339100  | 3.78362600 | -10.15392000 L |
| H-H_  | 7.33167800   | 9.18482900 | -15.86462400 L |
| C-C_R | -12.68512000 | 6.51483100 | -2.48043200 L  |
| H-H_  | -11.98629600 | 7.32531400 | -2.30311100 L  |
| C-C_R | -14.50115600 | 5.12802200 | -1.75084200 L  |
| H-H_  | -15.22144300 | 4.83739000 | -0.99503700 L  |
| C-C_R | -13.60884500 | 6.16425600 | -1.50331100 L  |
| H-H_  | -13.63156800 | 6.69268600 | -0.55622700 L  |
| C-C_R | -12.65533900 | 5.84820400 | -3.69507900 L  |
| C-C_R | -13.54522200 | 4.79980400 | -3.94085900 L  |
| H-H_  | -11.94185800 | 6.13245100 | -4.45953800 L  |
| N-N_R | -13.51274300 | 4.11181100 | -5.17179000 L  |
| C-C_R | -14.46868500 | 4.44234500 | -2.95539800 L  |
| C-C_R | -12.28236800 | 3.78674500 | -5.76583000 L  |
| C-C_R | -14.71792000 | 3.72907700 | -5.79458400 L  |
| H-H_  | -15.15424700 | 3.62397800 | -3.13964400 L  |
| C-C_R | -12.12471700 | 3.86260700 | -7.15436000 L  |
| C-C_R | -11.19170700 | 3.38687600 | -4.98541800 L  |
| C-C_R | -15.81085900 | 4.60106600 | -5.81678300 L  |
| C-C_R | -14.83810100 | 2.47277700 | -6.39227600 L  |
| H-H_  | -12.94982400 | 4.20688900 | -7.76522500 L  |
| C-C_R | -10.92267000 | 3.51802900 | -7.74419300 L  |
| H-H_  | -11.29780800 | 3.32891100 | -3.91002800 L  |
| C-C_R | -9.98747100  | 3.06519200 | -5.58196200 L  |
| C-C_R | -16.99784600 | 4.21482300 | -6.41894200 L  |
| H-H_  | -15.71845000 | 5.57931700 | -5.36106000 L  |
| H-H_  | -13.99688100 | 1.79029400 | -6.37014300 L  |
| C-C_R | -16.02556100 | 2.09948500 | -7.00315500 L  |
| C-C_R | -9.83432800  | 3.09779100 | -6.97189000 L  |
| H-H_  | -10.82149700 | 3.60280000 | -8.81780500 L  |

|       |              |             |                |
|-------|--------------|-------------|----------------|
| H-H_  | -9.14120000  | 2.77411900  | -4.97280400 L  |
| H-H_  | -17.83620400 | 4.90225200  | -6.42952700 L  |
| C-C_R | -17.11428100 | 2.96582500  | -7.01791800 L  |
| H-H_  | -16.10187100 | 1.11870400  | -7.45823400 L  |
| C-C_R | -8.52199800  | 2.77594800  | -7.56008400 L  |
| H-H_  | -18.04382700 | 2.66838500  | -7.48792900 L  |
| N-N_R | -7.47467700  | 3.13130800  | -6.83154000 L  |
| C-C_R | -8.32611900  | 2.16195700  | -8.83973900 L  |
| C-C_R | -6.25333800  | 3.01481200  | -7.35384500 L  |
| N-N_R | -7.12687800  | 2.13219400  | -9.39120000 L  |
| C-C_R | -9.38765900  | 1.49132200  | -9.61765300 L  |
| C-C_R | -6.07605500  | 2.58622500  | -8.69175200 L  |
| C-C_R | -5.10173900  | 3.36691200  | -6.58809200 L  |
| C-C_R | -10.41006200 | 0.75404800  | -9.01135300 L  |
| C-C_R | -9.33139200  | 1.51819000  | -11.01358900 L |
| C-C_R | -4.77866800  | 2.58026600  | -9.27556800 L  |
| C-C_R | -3.85331500  | 3.33056700  | -7.16667700 L  |
| C-C_R | -5.25780300  | 3.79071800  | -5.23573000 L  |
| C-C_R | -11.35682500 | 0.09341100  | -9.76986400 L  |
| H-H_  | -10.45034400 | 0.67386300  | -7.93262700 L  |
| H-H_  | -8.52288700  | 2.05692700  | -11.49215300 L |
| C-C_R | -10.28793000 | 0.87914000  | -11.77987500 L |
| C-C_R | -3.65861000  | 2.97550600  | -8.51926200 L  |
| C-C_R | -4.65653200  | 2.09777600  | -10.60659900 L |
| H-H_  | -2.99755800  | 3.63019000  | -6.57634800 L  |
| N-N_R | -5.35891000  | 4.13888200  | -4.13676800 L  |
| H-H_  | -12.12874400 | -0.48997400 | -9.28505700 L  |
| C-C_R | -11.32098000 | 0.16089200  | -11.16652800 L |
| H-H_  | -10.24378900 | 0.93447300  | -12.86017100 L |
| N-N_R | -4.55570500  | 1.70097900  | -11.69245700 L |
| N-N_R | -12.30124300 | -0.48673900 | -11.93555600 L |
| C-C_R | -13.64366100 | -0.49276500 | -11.50448400 L |
| C-C_R | -11.95373400 | -1.11118600 | -13.15089300 L |
| C-C_R | -14.21424400 | 0.65468200  | -10.94980000 L |
| C-C_R | -14.42152400 | -1.64593600 | -11.63305200 L |
| C-C_R | -12.78619700 | -0.99882300 | -14.26705100 L |
| C-C_R | -10.77074700 | -1.84857900 | -13.25316600 L |
| H-H_  | -13.61574300 | 1.55272100  | -10.85534200 L |
| C-C_R | -15.53456100 | 0.64536600  | -10.52825200 L |
| H-H_  | -13.98145200 | -2.53970500 | -12.05732400 L |
| C-C_R | -15.74628300 | -1.64333100 | -11.22131000 L |
| H-H_  | -13.69960000 | -0.42016700 | -14.19383400 L |
| C-C_R | -12.44370500 | -1.62092300 | -15.45798800 L |
| H-H_  | -10.12573100 | -1.94243900 | -12.38926600 L |



|       |              |             |                |
|-------|--------------|-------------|----------------|
| C-C_R | -10.42894500 | -2.45155800 | -14.45419900 L |
| H-H_  | -15.96188000 | 1.54654500  | -10.10330000 L |
| C-C_R | -16.31064600 | -0.50194800 | -10.66427200 L |
| H-H_  | -16.33768700 | -2.54497600 | -11.32724100 L |
| C-C_R | -11.26210600 | -2.34721100 | -15.56112300 L |
| H-H_  | -13.09881400 | -1.52404500 | -16.31548300 L |
| H-H_  | -9.50690800  | -3.01879000 | -14.51825500 L |
| H-H_  | -17.34534700 | -0.50317200 | -10.34321800 L |
| H-H_  | -10.99395300 | -2.82515000 | -16.49652800 L |
| C-C_R | 34.59451100  | -1.86550200 | -4.42628900 L  |
| H-H_  | 33.68410500  | -2.45127600 | -4.48269700 L  |
| C-C_R | 36.60608300  | -1.23558100 | -3.26749700 L  |
| H-H_  | 37.26054800  | -1.31367200 | -2.40706300 L  |
| C-C_R | 35.43625200  | -1.98695600 | -3.32620200 L  |
| H-H_  | 35.18169600  | -2.66144300 | -2.51624000 L  |
| C-C_R | 34.91411700  | -1.00741300 | -5.46410400 L  |
| C-C_R | 36.08863800  | -0.24691700 | -5.40449200 L  |
| H-H_  | 34.26648600  | -0.92469400 | -6.32812600 L  |
| N-N_R | 36.41145400  | 0.63331100  | -6.45111200 L  |
| C-C_R | 36.93437000  | -0.36726600 | -4.29426400 L  |
| C-C_R | 35.39853000  | 1.37148300  | -7.08167300 L  |
| C-C_R | 37.74591400  | 0.78387100  | -6.86226800 L  |
| H-H_  | 37.83214900  | 0.23629300  | -4.23896500 L  |
| C-C_R | 35.42611900  | 1.56240800  | -8.46862700 L  |
| C-C_R | 34.34513800  | 1.91422700  | -6.33470900 L  |
| C-C_R | 38.59868600  | -0.32462200 | -6.91913200 L  |
| C-C_R | 38.23143700  | 2.04744800  | -7.22014200 L  |
| H-H_  | 36.21290700  | 1.10277000  | -9.05659500 L  |
| C-C_R | 34.43626900  | 2.29994800  | -9.08532500 L  |
| H-H_  | 34.32004900  | 1.77066100  | -5.26057600 L  |
| C-C_R | 33.35559400  | 2.64195400  | -6.96347500 L  |
| C-C_R | 39.91379000  | -0.16350500 | -7.32204500 L  |
| H-H_  | 38.21716100  | -1.30573200 | -6.66158800 L  |
| H-H_  | 37.57544600  | 2.90608300  | -7.16202600 L  |
| C-C_R | 39.54704200  | 2.19385700  | -7.62658000 L  |
| C-C_R | 33.39590100  | 2.87073500  | -8.34260100 L  |
| H-H_  | 34.45418300  | 2.41937600  | -10.16189000 L |
| H-H_  | 32.52859000  | 3.04788200  | -6.39484100 L  |
| H-H_  | 40.56408700  | -1.03032800 | -7.37091400 L  |
| C-C_R | 40.39461500  | 1.09153700  | -7.67674500 L  |
| H-H_  | 39.91344400  | 3.17745700  | -7.89382500 L  |
| C-C_R | 32.29238100  | 3.62381200  | -8.98211800 L  |
| H-H_  | 41.42525000  | 1.21058300  | -7.99070300 L  |
| N-N_R | 31.10047800  | 3.38248000  | -8.45250500 L  |

|       |             |             |                |
|-------|-------------|-------------|----------------|
| C-C_R | 32.43961400 | 4.48370300  | -10.09506100 L |
| C-C_R | 30.01576400 | 3.88480300  | -9.05354900 L  |
| N-N_R | 31.35831800 | 4.91211700  | -10.74895200 L |
| C-C_R | 33.72501100 | 5.00309700  | -10.59772100 L |
| C-C_R | 30.15758300 | 4.60372600  | -10.27442200 L |
| C-C_R | 28.72431400 | 3.65956200  | -8.49853400 L  |
| C-C_R | 34.78893400 | 5.32224800  | -9.74633400 L  |
| C-C_R | 33.87235200 | 5.26253700  | -11.96532700 L |
| C-C_R | 28.97459500 | 5.01846500  | -10.96627000 L |
| C-C_R | 27.57280900 | 4.11995200  | -9.17383100 L  |
| C-C_R | 28.65187400 | 2.90019900  | -7.30135100 L  |
| C-C_R | 35.96932900 | 5.84037200  | -10.24242900 L |
| H-H_  | 34.67817500 | 5.19623200  | -8.67589000 L  |
| H-H_  | 33.04024500 | 5.05443400  | -12.62582500 L |
| C-C_R | 35.05410100 | 5.76968600  | -12.47160500 L |
| C-C_R | 27.73420200 | 4.76324700  | -10.41566100 L |
| C-C_R | 29.09377100 | 5.72616600  | -12.19317900 L |
| N-N_R | 28.60303500 | 2.27976200  | -6.32227200 L  |
| H-H_  | 36.77543700 | 6.10668100  | -9.56975900 L  |
| C-C_R | 36.12312500 | 6.05744100  | -11.61643700 L |
| H-H_  | 35.15926100 | 5.94218600  | -13.53623500 L |
| H-H_  | 26.85601700 | 5.11579700  | -10.93888900 L |
| N-N_R | 29.17602300 | 6.30471000  | -13.19386000 L |
| N-N_R | 37.32857900 | 6.57347700  | -12.12295700 L |
| C-C_R | 38.55572100 | 6.11169600  | -11.61415100 L |
| C-C_R | 37.30498300 | 7.54844700  | -13.14057500 L |
| C-C_R | 38.72965300 | 4.75477200  | -11.32129100 L |
| C-C_R | 39.61630400 | 6.99614500  | -11.39935000 L |
| C-C_R | 38.23904900 | 7.50936200  | -14.17887900 L |
| C-C_R | 36.34137500 | 8.56061400  | -13.12306000 L |
| H-H_  | 37.91460900 | 4.06401800  | -11.49865500 L |
| C-C_R | 39.94053000 | 4.29952400  | -10.82277000 L |
| H-H_  | 39.48114700 | 8.04883700  | -11.61612500 L |
| C-C_R | 40.82455500 | 6.52947600  | -10.90801600 L |
| H-H_  | 38.97790200 | 6.71652900  | -14.20362000 L |
| C-C_R | 38.20993700 | 8.47193500  | -15.17561900 L |
| H-H_  | 35.62087700 | 8.59759400  | -12.31552300 L |
| C-C_R | 36.31367100 | 9.51042700  | -14.13217700 L |
| H-H_  | 40.06281500 | 3.24222700  | -10.61442800 L |
| C-C_R | 40.99624200 | 5.17954400  | -10.61542900 L |
| H-H_  | 41.63727300 | 7.22854900  | -10.74385700 L |
| C-C_R | 37.24762300 | 9.47539300  | -15.16101700 L |
| H-H_  | 38.93670800 | 8.42759100  | -15.97792000 L |
| H-H_  | 35.56031900 | 10.28861700 | -14.10683700 L |

|       |             |             |                |
|-------|-------------|-------------|----------------|
| H-H_  | 41.94531400 | 4.82009600  | -10.23610600 L |
| H-H_  | 37.22360100 | 10.22129900 | -15.94681000 L |
| C-C_R | 17.20680300 | 7.55130100  | -2.56261800 L  |
| H-H_  | 17.90562700 | 8.36178400  | -2.38529700 L  |
| C-C_R | 15.39076800 | 6.16449300  | -1.83302800 L  |
| H-H_  | 14.67048000 | 5.87386100  | -1.07722300 L  |
| C-C_R | 16.28307800 | 7.20072600  | -1.58549600 L  |
| H-H_  | 16.26035500 | 7.72915600  | -0.63841300 L  |
| C-C_R | 17.23658400 | 6.88467500  | -3.77726400 L  |
| C-C_R | 16.34670100 | 5.83627400  | -4.02304400 L  |
| H-H_  | 17.95006500 | 7.16892200  | -4.54172400 L  |
| N-N_R | 16.37918000 | 5.14828100  | -5.25397600 L  |
| C-C_R | 15.42323800 | 5.47881500  | -3.03758400 L  |
| C-C_R | 17.60955600 | 4.82321500  | -5.84801600 L  |
| C-C_R | 15.17400300 | 4.76554800  | -5.87677000 L  |
| H-H_  | 14.73767600 | 4.66044800  | -3.22183000 L  |
| C-C_R | 17.76720700 | 4.89907800  | -7.23654500 L  |
| C-C_R | 18.70021600 | 4.42334600  | -5.06760400 L  |
| C-C_R | 14.08106400 | 5.63753600  | -5.89896900 L  |
| C-C_R | 15.05382300 | 3.50924700  | -6.47446200 L  |
| H-H_  | 16.94209900 | 5.24335900  | -7.84741100 L  |
| C-C_R | 18.96925300 | 4.55449900  | -7.82637800 L  |
| H-H_  | 18.59411500 | 4.36538100  | -3.99221400 L  |
| C-C_R | 19.90445200 | 4.10166300  | -5.66414800 L  |
| C-C_R | 12.89407700 | 5.25129300  | -6.50112700 L  |
| H-H_  | 14.17347300 | 6.61578700  | -5.44324600 L  |
| H-H_  | 15.89504200 | 2.82676400  | -6.45232900 L  |
| C-C_R | 13.86636200 | 3.13595600  | -7.08534000 L  |
| C-C_R | 20.05759500 | 4.13426200  | -7.05407500 L  |
| H-H_  | 19.07042700 | 4.63927000  | -8.89999100 L  |
| H-H_  | 20.75072400 | 3.81059000  | -5.05499000 L  |
| H-H_  | 12.05671900 | 5.93875700  | -6.51171500 L  |
| C-C_R | 12.77764200 | 4.00229500  | -7.10010300 L  |
| H-H_  | 13.79005200 | 2.15517500  | -7.54041900 L  |
| C-C_R | 21.37092500 | 3.81245300  | -7.64227200 L  |
| H-H_  | 11.84809600 | 3.70485500  | -7.57011500 L  |
| N-N_R | 22.41724600 | 4.16777800  | -6.91372500 L  |
| C-C_R | 21.56580400 | 3.19842800  | -8.92192400 L  |
| C-C_R | 23.63858600 | 4.05128300  | -7.43603000 L  |
| N-N_R | 22.76504500 | 3.16866400  | -9.47338500 L  |
| C-C_R | 20.50426400 | 2.52779300  | -9.69983800 L  |
| C-C_R | 23.81686800 | 3.62273100  | -8.77394100 L  |
| C-C_R | 24.79018400 | 4.40338300  | -6.67027800 L  |
| C-C_R | 19.48186100 | 1.79051900  | -9.09353800 L  |

|       |             |             |                |
|-------|-------------|-------------|----------------|
| C-C_R | 20.56053200 | 2.55466000  | -11.09577400 L |
| C-C_R | 25.11325500 | 3.61673700  | -9.35775400 L  |
| C-C_R | 26.03860900 | 4.36703700  | -7.24886200 L  |
| C-C_R | 24.63412000 | 4.82718900  | -5.31791600 L  |
| C-C_R | 18.53509800 | 1.12988100  | -9.85205000 L  |
| H-H_  | 19.44158000 | 1.71033300  | -8.01481300 L  |
| H-H_  | 21.36903600 | 3.09339700  | -11.57433900 L |
| C-C_R | 19.60399300 | 1.91561000  | -11.86206100 L |
| C-C_R | 26.23331400 | 4.01197600  | -8.60144700 L  |
| C-C_R | 25.23539100 | 3.13424700  | -10.68878500 L |
| H-H_  | 26.89436500 | 4.66666000  | -6.65853400 L  |
| N-N_R | 24.53301400 | 5.17535200  | -4.21895400 L  |
| H-H_  | 17.76317900 | 0.54649600  | -9.36724300 L  |
| C-C_R | 18.57094300 | 1.19736200  | -11.24871400 L |
| H-H_  | 19.64813400 | 1.97094300  | -12.94235700 L |
| N-N_R | 25.33621800 | 2.73745000  | -11.77464300 L |
| N-N_R | 17.59068000 | 0.54973100  | -12.01774200 L |
| C-C_R | 16.24826200 | 0.54370500  | -11.58666900 L |
| C-C_R | 17.93819000 | -0.07471500 | -13.23307800 L |
| C-C_R | 15.67767900 | 1.69115200  | -11.03198500 L |
| C-C_R | 15.47040000 | -0.60946600 | -11.71523800 L |
| C-C_R | 17.10572600 | 0.03764700  | -14.34923600 L |
| C-C_R | 19.12117600 | -0.81210800 | -13.33535100 L |
| H-H_  | 16.27618100 | 2.58919100  | -10.93752700 L |
| C-C_R | 14.35736200 | 1.68183600  | -10.61043700 L |
| H-H_  | 15.91047200 | -1.50323500 | -12.13950900 L |
| C-C_R | 14.14564000 | -0.60686100 | -11.30349600 L |
| H-H_  | 16.19232300 | 0.61630400  | -14.27602000 L |
| C-C_R | 17.44821800 | -0.58445300 | -15.54017300 L |
| H-H_  | 19.76719200 | -0.90593400 | -12.47145400 L |
| C-C_R | 19.46297800 | -1.41508800 | -14.53638400 L |
| H-H_  | 13.93004300 | 2.58301500  | -10.18548500 L |
| C-C_R | 13.58127700 | 0.53452300  | -10.74645800 L |
| H-H_  | 13.55423600 | -1.50850500 | -11.40942700 L |
| C-C_R | 18.62981700 | -1.31074000 | -15.64330800 L |
| H-H_  | 16.79310900 | -0.48757500 | -16.39766800 L |
| H-H_  | 20.38501500 | -1.98231900 | -14.60044000 L |
| H-H_  | 12.54657600 | 0.53329900  | -10.42540400 L |
| H-H_  | 18.89797100 | -1.78867900 | -16.57871400 L |
